# Supplementary material
Source: PubMed Central journal article supplement (PMC4817545)
Supplement: NIHMS772906-supplement-SI.pdf [file NIHMS772906-supplement-SI.pdf]

Supplementary Materials for

**Functionalization of C(sp<sup>3</sup>)-H bonds Using a Transient Directing Group**

Fang-Lin Zhang,\* Kai Hong,\* Tuan-Jie Li,\* Hojoon Park, Jin-Quan Yu†

The Scripps Research Institute, 10550 N. Torrey Pines Road, La Jolla, California 92037, USA.

\*These authors contributed equally to this work.

†Corresponding author. Email: [yu200@scripps.edu](mailto:yu200@scripps.edu)

## Table of Contents

|                                                                                                                        |      |
|------------------------------------------------------------------------------------------------------------------------|------|
| General Information.....                                                                                               | S2   |
| Experimental Section.....                                                                                              | S3   |
| I. Substrate Preparation (Fig. 4).....                                                                                 | S3   |
| II. Pd(II)-Catalyzed Benzylic C(sp <sup>3</sup> )-H Arylation of Aldehydes (Fig. 2).....                               | S8   |
| General Procedure.....                                                                                                 | S8   |
| Table S1. Optimization of Pd(II)-Catalyzed Benzylic C(sp <sup>3</sup> )-H Arylation of Aldehydes.....                  | S8   |
| Full Characterization of Reaction Products.....                                                                        | S9   |
| III. Pd(II)-Catalyzed C(sp <sup>3</sup> )-H Arylation of Ketones (Fig. 3).....                                         | S22  |
| General Procedure.....                                                                                                 | S22  |
| Table S2. Optimization of Pd(II)-Catalyzed C(sp <sup>3</sup> )-H Arylation of Ketones.....                             | S22  |
| Full Characterization of Reaction Products and Proof of Stereochemistry.....                                           | S23  |
| IV. Pd(II)-Catalyzed Enantioselective Benzylic C(sp <sup>3</sup> )-H Arylation of Aldehydes (Fig. 4).....              | S33  |
| General Procedure.....                                                                                                 | S33  |
| Table S3. Optimization of Pd(II)-Catalyzed Enantioselective Benzylic C(sp <sup>3</sup> )-H Arylation of Aldehydes..... | S33  |
| Full Characterization of Reaction Products and Proof of Stereochemistry.....                                           | S34  |
| <sup>1</sup> H and <sup>13</sup> C NMR Spectra.....                                                                    | S44  |
| HPLC Spectra.....                                                                                                      | S124 |
| X-Ray Crystallographic Data.....                                                                                       | S140 |
| References.....                                                                                                        | S152 |

## General Information

Unless otherwise noted all commercial materials were used without further purification. Solvents were obtained from Oakwood and Acros and used directly without further purification. Analytical thin layer chromatography was performed on 0.25 mm silica gel 60-F254. Visualization was carried out with UV light.  $^1\text{H}$  NMR spectra were recorded on Bruker DPX-400 instrument (400 MHz), Bruker DRX-500 (500 MHz) or Bruker DRX-600 instrument (600 MHz). Chemical shifts were quoted in parts per million (ppm) referenced to 0.0 ppm for tetramethylsilane. The following abbreviations (or combinations thereof) were used to explain multiplicities: s = singlet, d = doublet, t = triplet, q = quartet, m = multiplet, br = broad. Coupling constants,  $J$ , were reported in Hertz unit (Hz).  $^{13}\text{C}$  NMR spectra were recorded on Bruker DPX-400 instrument (100 MHz), Bruker DRX-500 (125 MHz) or Bruker DRX-600 instrument (150 MHz), and were fully decoupled by broad band proton decoupling. Chemical shifts were reported in ppm referenced to the center line of a triplet at 77.0 ppm of chloroform-d.  $^{19}\text{F}$  NMR spectra were recorded on Bruker DPX-400 instrument (376 MHz) and Chemical shifts were reported in ppm. High-resolution mass spectra (HRMS) were recorded on an Agilent Mass spectrometer using ESI-TOF (electrospray ionization-time of flight). Enantiomeric ratios (er) were determined on a Hitachi LaChrom Elite HPLC system using commercially available chiral columns. IR spectrums were recorded on Thermo Scientific Nicolet 380 Fourier transform infrared spectrometer. The single crystal X-ray diffraction studies were carried out on a Bruker Kappa APEX-II CCD diffractometer equipped with Mo  $K_{\alpha}$  radiation ( $\lambda = 0.71073$ ).

## Experimental Section

### I. Substrate Preparation (Fig. 4)

#### Method A:

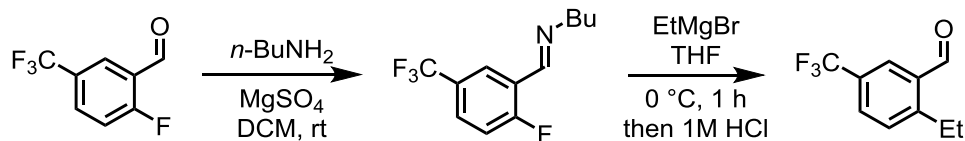

The aldehyde **5a** was prepared according to the literature procedure with modification (31). To a solution of 2-fluoro-5-(trifluoromethyl)benzaldehyde (1.92 g, 10.0 mmol) in DCM (10 mL) was added butylamine (1.04 mL, 10.5 mmol) and anhydrous MgSO<sub>4</sub> (1.0 g). The reaction was allowed to stir overnight at ambient temperature. Upon completion, the reaction mixture was filtered, concentrated and the crude product was used in the next step without further purification.

To a solution of *N*-butyl-1-(2-fluoro-5-(trifluoromethyl)phenyl)methanimine (max. 10.0 mmol) in THF (15 mL) was added ethylmagnesium bromide (6.7 mL, 20.0 mmol, 3.0 M in diethyl ether) dropwise at 0 °C. After stirring for 1 h, the reaction was quenched at 0 °C with 1 M HCl, and stirred for 30 min. The layers were separated, and the aqueous layer was extracted with ethyl acetate. The combined organic layers were dried over anhydrous MgSO<sub>4</sub>, filtered and concentrated *in vacuo*. The crude reaction mixture was purified on silica gel to afford the desired product as a pale yellow oil.

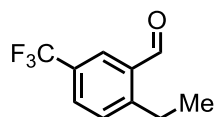

#### 2-ethyl-5-(trifluoromethyl)benzaldehyde (5a)

<sup>1</sup>H NMR (CDCl<sub>3</sub>, 500 MHz): δ 10.33 (s, 1H), 8.09 (d, *J* = 1.5 Hz, 1H), 7.75 (dd, *J* = 8.0, 1.5 Hz, 1H), 7.45 (d, *J* = 8.0 Hz, 1H), 3.14 (q, *J* = 7.6 Hz, 2H), 1.31 (t, *J* = 7.6 Hz, 3H);

<sup>13</sup>C NMR (CDCl<sub>3</sub>, 125 MHz): δ 190.78, 150.72, 133.73, 130.96, 130.15 (q, *J*<sub>CF</sub> = 3.4 Hz), 129.21 (q, *J*<sub>CF</sub> = 33.3 Hz), 128.22 (q, *J*<sub>CF</sub> = 3.8 Hz), 123.70 (d, *J*<sub>CF</sub> = 272.3 Hz), 25.66, 16.07;

<sup>19</sup>F NMR (CDCl<sub>3</sub>, 376 MHz): δ - 63.08;

IR (neat): 1703, 1618, 1330, 1200, 1163, 1117, 1083, 1049, 899, 843 cm<sup>-1</sup>;

HRMS (ESI-TOF): *m/z* calculated for C<sub>10</sub>H<sub>10</sub>F<sub>3</sub>O<sup>+</sup> [M+H]<sup>+</sup> 203.0678, found 203.0683.

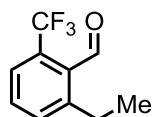

#### 2-ethyl-6-(trifluoromethyl)benzaldehyde (5c)

<sup>1</sup>H NMR (CDCl<sub>3</sub>, 600 MHz): δ 10.54 (q, *J* = 2.7 Hz, 1H); 7.63 (d, *J* = 7.7 Hz, 1H), 7.55 (t, *J* = 7.7 Hz, 1H), 7.51 (d, *J* = 7.7 Hz, 1H), 2.94 (q, *J* = 7.5 Hz, 2H), 1.25 (t, *J* = 7.5 Hz, 3H);

$^{13}\text{C}$  NMR ( $\text{CDCl}_3$ , 150 MHz):  $\delta$  192.07, 146.89, 134.30, 132.88, 131.81, 130.96 (q,  $J_{\text{CF}} = 31.5$  Hz), 123.98 (q,  $J_{\text{CF}} = 5.9$  Hz), 123.93 (q,  $J_{\text{CF}} = 274.5$  Hz), 26.94, 15.89;  
 $^{19}\text{F}$  NMR ( $\text{CDCl}_3$ , 376 MHz):  $\delta - 55.82$ ;  
IR (neat): 2360.9, 2341.3, 1705.6, 1309.3, 1163.1, 1118.9, 1087.7, 809.3, 719.8, 669.5  $\text{cm}^{-1}$ ;  
HRMS (ESI-TOF):  $m/z$  calculated for  $\text{C}_{10}\text{H}_{10}\text{F}_3\text{O}^+ [\text{M}+\text{H}]^+$  203.0678, found 203.0680.

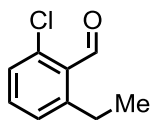

#### 2-chloro-6-ethylbenzaldehyde (5e)

$^1\text{H}$  NMR ( $\text{CDCl}_3$ , 600 MHz):  $\delta$  10.64 (s, 1H), 7.39 (t,  $J = 7.8$  Hz, 1H), 7.31 (dd,  $J = 7.8, 1.3$  Hz, 1H), 7.20 (d,  $J = 7.8$  Hz, 1H), 2.97 (q,  $J = 7.5$  Hz, 2H), 1.21 (t,  $J = 7.5$  Hz, 3H);  
 $^{13}\text{C}$  NMR ( $\text{CDCl}_3$ , 150 MHz):  $\delta$  192.35, 148.54, 138.73, 133.67, 130.55, 129.18, 128.25, 26.83, 15.61;  
IR (neat): 2972.6, 2872.0, 2360.2, 2341.4, 1693.1, 1588.8, 1560.4, 1453.6, 1404.2, 1265.0, 1182.8, 785.1, 683.6  $\text{cm}^{-1}$ ;  
HRMS (ESI-TOF):  $m/z$  calculated for  $\text{C}_9\text{H}_{10}\text{ClO}^+ [\text{M}+\text{H}]^+$  169.0415, found 169.0412.

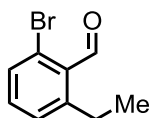

#### 2-bromo-6-ethylbenzaldehyde (5f)

$^1\text{H}$  NMR ( $\text{CDCl}_3$ , 600 MHz):  $\delta$  10.51 (s, 1H), 7.51 (dd,  $J = 7.8, 1.2$  Hz, 1H), 7.30 (t,  $J = 7.8$  Hz, 1H), 7.25-7.24 (m, 1H), 2.96 (q,  $J = 7.5$  Hz, 2H), 1.22 (t,  $J = 7.5$  Hz, 3H);  
 $^{13}\text{C}$  NMR ( $\text{CDCl}_3$ , 150 MHz):  $\delta$  194.36, 148.65, 133.77, 131.65, 131.60, 129.90, 127.82, 26.81, 15.71;  
IR (neat): 2970.8, 2871.8, 2359.0, 2340.7, 1692.9, 1587.5, 1557.4, 1450.7, 1401.7, 1262.8, 1183.5, 854.5, 770.6, 669.5  $\text{cm}^{-1}$ ;  
HRMS (ESI-TOF):  $m/z$  calculated for  $\text{C}_9\text{H}_{10}\text{BrO}^+ [\text{M}+\text{H}]^+$  212.9910, found 212.9913.

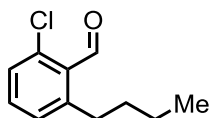

#### 2-butyl-6-chlorobenzaldehyde (5g)

$^1\text{H}$  NMR ( $\text{CDCl}_3$ , 600 MHz):  $\delta$  10.62 (s, 1H), 7.36 (t,  $J = 7.8$  Hz, 1H), 7.29 (dd,  $J = 7.8, 1.2$  Hz, 1H), 7.17 (d,  $J = 7.8$  Hz, 1H), 2.95-2.92 (m, 2H), 1.56-1.51 (m, 2H), 1.43-1.36 (m, 2H), 0.93 (t,  $J = 7.3$  Hz, 3H);  
 $^{13}\text{C}$  NMR ( $\text{CDCl}_3$ , 150 MHz):  $\delta$  192.35, 147.27, 138.68, 133.42, 130.71, 129.93, 128.24, 33.71, 33.33, 22.69, 13.90;  
IR (neat): 2957.1, 2929.9, 2869.8, 2359.0, 2341.4, 1696.9, 1589.4, 1558.9, 1454.1, 1404.3, 1182.5, 786.3  $\text{cm}^{-1}$ ;  
HRMS (ESI-TOF):  $m/z$  calculated for  $\text{C}_{11}\text{H}_{14}\text{ClO}^+ [\text{M}+\text{H}]^+$  197.0728, found 197.0730.

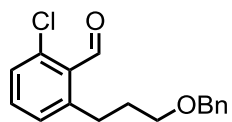

**2-(3-(benzyloxy)propyl)-6-chlorobenzaldehyde (5h)**

$^1\text{H}$  NMR ( $\text{CDCl}_3$ , 600 MHz):  $\delta$  10.61 (s, 1H), 7.35-7.32 (m, 5H), 7.30-7.27 (m, 2H), 7.16 (d,  $J = 7.5$  Hz, 1H), 4.51 (s, 2H), 3.51 (t,  $J = 6.2$  Hz, 2H), 3.04-3.02 (m, 2H), 1.91-1.87 (m, 2H);

$^{13}\text{C}$  NMR ( $\text{CDCl}_3$ , 150 MHz):  $\delta$  192.27, 146.33, 138.89, 138.49, 133.51, 130.70, 130.15, 128.46, 128.31, 127.65, 127.48, 72.80, 69.46, 31.15, 30.28;

IR (neat): 2856.2, 1694.1, 1588.8, 1453.4, 1181.7, 1099.8, 1027.6, 787.5, 734.0, 696.7  $\text{cm}^{-1}$ ;

HRMS (ESI-TOF):  $m/z$  calculated for  $\text{C}_{17}\text{H}_{18}\text{ClO}_2^+$   $[\text{M}+\text{H}]^+$  289.0990, found 289.0988.

**Method B:**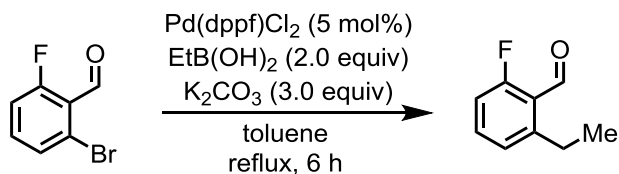

To a mixture of ethylboronic acid (0.734 g, 10.0 mmol), 2-bromo-6-fluorobenzaldehyde (1.02 g, 5.0 mmol), and K<sub>2</sub>CO<sub>3</sub> (2.08 g, 15.0 mmol) in dry toluene (15 mL) was added PdCl<sub>2</sub>(dppf) (183 mg, 0.25 mmol). The resulting reaction mixture was heated under reflux for 6 h. Upon completion, the reaction mixture was cooled to room temperature. The solvent was removed and the crude mixture was diluted with DCM, washed with brine, dried over MgSO<sub>4</sub>, filtered, and concentrated *in vacuo*. The crude residue was purified by flash chromatography to afford aldehyde **5d** as a colorless oil.

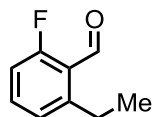**2-fluoro-6-ethylbenzaldehyde (5d)**

<sup>1</sup>H NMR (CDCl<sub>3</sub>, 600 MHz): δ 10.54 (s, 1H), 7.45-7.49 (m, 1H), 7.07 (d, *J* = 7.4 Hz, 1H), 7.03-6.99 (m, 1H), 3.03 (q, *J* = 7.2 Hz, 2H), 1.22 (t, *J* = 7.2 Hz, 3H);

<sup>13</sup>C NMR (CDCl<sub>3</sub>, 150 MHz): δ 189.05 (d, *J*<sub>CF</sub> = 11.1 Hz), 166.28 (d, *J*<sub>CF</sub> = 257.6 Hz), 148.79, 135.21 (d, *J*<sub>CF</sub> = 10.5 Hz), 125.94 (d, *J*<sub>CF</sub> = 3.2 Hz), 122.03 (d, *J*<sub>CF</sub> = 4.8 Hz), 113.75 (d, *J*<sub>CF</sub> = 21.8 Hz), 26.71, 15.35;

<sup>19</sup>F NMR (CDCl<sub>3</sub>, 376 MHz): δ -121.25;

IR (neat): 1697, 1610, 1571, 1472, 1416, 1272, 1244, 1189, 829, 799 cm<sup>-1</sup>;

HRMS (ESI-TOF): *m/z* calculated for C<sub>9</sub>H<sub>10</sub>FO<sup>+</sup> [M+H]<sup>+</sup> 153.0710, found 153.0712.

### Method C:

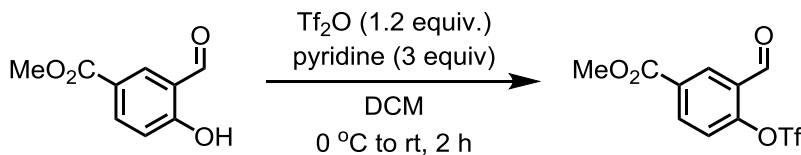

To a solution of methyl 3-formyl-4-hydroxybenzoate (607.8 mg, 3.37 mmol) in DCM was added pyridine at room temperature. After cooling the reaction mixture to  $0\text{ }^\circ\text{C}$  with ice bath,  $\text{Tf}_2\text{O}$  was added dropwise. The reaction mixture was stirred for 1 h at  $0\text{ }^\circ\text{C}$ , and 1 h at room temperature. After removing solvent *in vacuo*, the crude residue was purified by flash column chromatography (hexanes : ethyl acetate = 10:1).

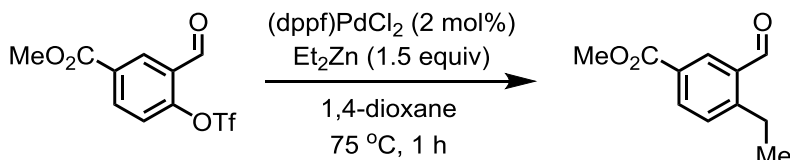

An oven-dried round-bottom flask was charged with methyl 3-formyl-4-((trifluoromethyl)sulfonyl)oxybenzoate (862.5 mg, 2.76 mmol) and 1,4-dioxane under  $\text{N}_2$  atmosphere. After adding  $(\text{dppf})\text{PdCl}_2$  (40.4 mg,  $55.2\text{ }\mu\text{mol}$ ) to the stirring solution,  $\text{Et}_2\text{Zn}$  solution (1.5 M in toluene, 2.76 ml, 4.14 mmol) was added dropwise. The reaction mixture was heated to  $75\text{ }^\circ\text{C}$  and stirred for 1 h. After cooling down to room temperature, reaction was quenched with dropwise addition of water. 1,4-Dioxane was removed *in vacuo*, and the aqueous layer was extracted with ethyl acetate. After drying the combined organic layers with  $\text{MgSO}_4$ , the residue was purified by flash column chromatography (hexanes : ethyl acetate = 10 : 1).

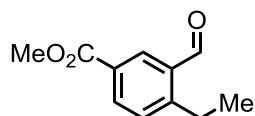

### methyl 4-ethyl-3-formylbenzoate (5b)

$^1\text{H}$  NMR ( $\text{CDCl}_3$ , 600 MHz):  $\delta$  10.29 (s, 1H), 8.48 (d,  $J = 1.9\text{ Hz}$ , 1H), 8.16 (dd,  $J = 8.0, 1.9\text{ Hz}$ , 1H), 7.40 (d,  $J = 8.0\text{ Hz}$ , 1H), 3.95 (s, 3H), 3.13 (q,  $J = 7.6\text{ Hz}$ , 2H), 1.29 (t,  $J = 7.5\text{ Hz}$ , 3H);

$^{13}\text{C}$  NMR ( $\text{CDCl}_3$ , 150 MHz):  $\delta$  191.70, 166.10, 151.83, 134.43, 133.57, 133.54, 130.57, 128.67, 52.33, 26.03, 15.81;

IR (neat): 1720, 1695, 1285, 1266, 1234, 1195, 1173, 1127, 1108,  $764\text{ cm}^{-1}$ ;

HRMS (ESI-TOF):  $m/z$  calculated for  $\text{C}_{11}\text{H}_{13}\text{O}_3^+$   $[\text{M}+\text{H}]^+$  193.0859, found 193.0864.



## II. Pd(II)-Catalyzed Benzylic C(sp<sup>3</sup>)-H Arylation of Aldehydes (Fig. 2)

### General Procedure

A reaction tube (10 mL) with magnetic stir bar was charged with aldehyde substrate (0.24 mmol), aryl iodide (0.20 mmol), silver trifluoroacetate (66.3 mg, 0.30 mmol), palladium acetate (4.5 mg, 0.02 mmol), glycine (6.0 mg, 0.08 mmol), acetic acid (1.8 mL) and H<sub>2</sub>O (0.2 mL) in air. The reaction tube was sealed and allowed to stir at ambient temperature for 10 minutes, then heated to 90 °C for 36 hours. Upon completion, the reaction mixture was cooled to room temperature, filtered through a silica gel plug, and concentrated *in vacuo*. The crude reaction mixture was purified on preparative TLC using hexanes/EtOAc as the eluent to afford the desired product.

**Table S1. Optimization of Pd(II)-Catalyzed Benzylic C(sp<sup>3</sup>)-H Arylation of Aldehydes<sup>\*,†</sup>**

Reaction scheme: 1a (2-allylbenzaldehyde) reacts with 10 mol% Pd(OAc)<sub>2</sub>, 40% amino acid, 1.5 equiv. 4-iodoanisole, and 1.5 equiv. AgTFA at 90 °C for 36 h to yield 2a (2-allyl-4-iodobenzaldehyde) and S1 (2-allyl-4-(4-methoxyphenyl)benzaldehyde). Ar = 4-MeOC<sub>6</sub>H<sub>4</sub>.

| entry                 | solvent                          | amino acid     | conversion (%) | 2a (%)                     | S1 (%)       |
|-----------------------|----------------------------------|----------------|----------------|----------------------------|--------------|
| 1                     | DCE                              | glycine        | -              | <2                         | <2           |
| 2                     | toluene                          | glycine        | -              | <2                         | <2           |
| 3                     | dioxane                          | glycine        | -              | <2                         | <2           |
| 4                     | MeCN                             | glycine        | -              | <2                         | <2           |
| 5                     | HFIP                             | glycine        | 60             | 18                         | 11           |
| 6                     | AcOH                             | glycine        | 90             | 52                         | 10           |
| 7                     | AcOH:HFIP (9:1)                  | glycine        | 94             | 59                         | 6            |
| 8                     | AcOH:H <sub>2</sub> O (9:1)      | glycine        | 93             | 71                         | 11           |
| 9                     | AcOH:H <sub>2</sub> O (4:1)      | glycine        | 84             | 63                         | 11           |
| <b>10<sup>‡</sup></b> | <b>AcOH:H<sub>2</sub>O (9:1)</b> | <b>glycine</b> | <b>95</b>      | <b>81 (72)<sup>§</sup></b> | <b>&lt;3</b> |
| 11 <sup>‡</sup>       | AcOH:H <sub>2</sub> O (9:1)      | L-alanine      | -              | 76                         | <3           |
| 12 <sup>‡</sup>       | AcOH:H <sub>2</sub> O (9:1)      | L-valine       | -              | 78                         | <3           |
| 13 <sup>‡</sup>       | AcOH:H <sub>2</sub> O (9:1)      | L-norvaline    | -              | 76                         | <3           |
| 14 <sup>‡</sup>       | AcOH:H <sub>2</sub> O (9:1)      | Ac-Gly-OH      | -              | <2                         | <2           |

<sup>\*</sup>Conditions: 0.1 mmol of **1a**, 1.5 equiv of 4-iodoanisole, 10 mol% of Pd(OAc)<sub>2</sub>, 40 mol% of amino acid, 1.5 equiv of AgTFA, 1.0 mL of solvent, 90 °C, 36 h. <sup>†</sup>The yield was determined by <sup>1</sup>H NMR analysis of the crude product using CH<sub>2</sub>Br<sub>2</sub> as the internal standard. <sup>‡</sup>0.12 mmol of **1a** and 0.1 mmol of 4-iodoanisole were used. <sup>§</sup>isolated yield.

## Full Characterization of Reaction Products

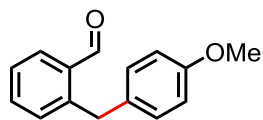

### 2-(4-methoxybenzyl)benzaldehyde (2a)

The compound **2a** was prepared according to the general procedure and was purified by preparative TLC to give a colorless oil in 72% yield (33 mg).

$^1\text{H NMR}$  ( $\text{CDCl}_3$ , 400 MHz):  $\delta$  10.26 (s, 1H), 7.85 (d,  $J = 7.6$  Hz, 1H), 7.52 (t,  $J = 7.6$  Hz, 1H), 7.40 (t,  $J = 7.6$  Hz, 1H), 7.25 (d,  $J = 7.6$  Hz, 1H), 7.06 (d,  $J = 8.4$  Hz, 2H), 6.81 (d,  $J = 8.4$  Hz, 2H), 4.38 (s, 2H), 3.77 (s, 3H);

$^{13}\text{C NMR}$  (100 MHz,  $\text{CDCl}_3$ )  $\delta$  192.37, 158.03, 143.48, 133.87, 133.84, 132.34, 131.89, 131.46, 129.70, 126.87, 113.96, 55.21, 37.13;

IR (neat): 2930, 1693, 1598, 1715, 1509, 1244, 1177, 1304, 772, 753  $\text{cm}^{-1}$ ;

HRMS (ESI-TOF):  $m/z$  calculated for  $\text{C}_{15}\text{H}_{15}\text{O}_2^+$   $[\text{M}+\text{H}]^+$  227.1067, found 227.1073.

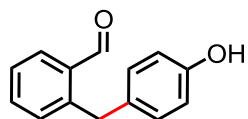

### 2-(4-hydroxybenzyl)benzaldehyde (2b)

The compound **2b** was prepared according to the general procedure and was purified by preparative TLC to give a colorless oil in 82% yield (35 mg).

$^1\text{H NMR}$  ( $\text{CDCl}_3$ , 400 MHz):  $\delta$  10.23 (s, 1H), 7.85 (d,  $J = 7.6$  Hz, 1H), 7.52 (t,  $J = 7.6$  Hz, 1H), 7.40 (t,  $J = 7.6$  Hz, 1H), 7.26 (d,  $J = 7.2$  Hz, 1H), 6.98 (d,  $J = 8.4$  Hz, 2H), 6.73 (d,  $J = 8.4$  Hz, 2H), 5.45 (s, 1H), 4.36 (s, 2H);

$^{13}\text{C NMR}$  ( $\text{CDCl}_3$ , 100 MHz):  $\delta$  192.84, 154.11, 143.60, 134.07, 133.72, 132.30, 131.98, 131.53, 129.83, 126.93, 115.43, 37.19.

IR (neat): 3337 (br), 2927, 1684, 1597, 1511, 1442, 1210, 906, 725, 647  $\text{cm}^{-1}$ ;

HRMS (ESI-TOF):  $m/z$  calculated for  $\text{C}_{14}\text{H}_{13}\text{O}_2^+$   $[\text{M}+\text{H}]^+$  213.0910, found 213.0907.

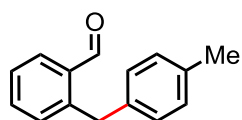

### 2-(4-methylbenzyl)benzaldehyde (2c)

The compound **2c** was prepared according to the general procedure and was purified by preparative TLC to give a colorless oil in 74% yield (31 mg).

$^1\text{H NMR}$  ( $\text{CDCl}_3$ , 400 MHz):  $\delta$  10.26 (s, 1H), 7.85 (d,  $J = 7.6$  Hz, 1H), 7.51 (t,  $J = 7.6$  Hz, 1H), 7.40 (t,  $J$

= 7.6 Hz, 1H), 7.26 (t,  $J = 7.6$  Hz, 1H), 7.08 (d,  $J = 8.0$  Hz, 2H), 7.02 (d,  $J = 8.0$  Hz, 2H), 4.40 (s, 2H), 2.30 (s, 3H);

$^{13}\text{C}$  NMR ( $\text{CDCl}_3$ , 100 MHz):  $\delta$  192.33, 143.30, 137.20, 135.79, 133.89, 133.87, 131.78, 131.56, 129.24, 128.62, 126.88, 37.57, 20.97;

IR (neat): 2920, 1695, 1598, 1513, 1451, 1290, 1208, 750  $\text{cm}^{-1}$ ;

HRMS (ESI-TOF):  $m/z$  calculated for  $\text{C}_{15}\text{H}_{15}\text{O}^+$   $[\text{M}+\text{H}]^+$  211.1117, found 211.1113.

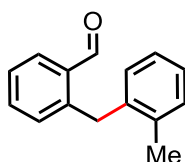

### 2-(2-methylbenzyl)benzaldehyde (2d)

The compound **2d** was prepared according to the general procedure and was purified by preparative TLC to give a colorless oil in 43% yield (18 mg).

$^1\text{H}$  NMR ( $\text{CDCl}_3$ , 600 MHz):  $\delta$  10.24 (s, 1H), 7.88 (dd,  $J = 7.6, 1.5$  Hz, 1H), 7.48 (td,  $J = 7.5, 1.5$  Hz, 1H), 7.42 (t,  $J = 7.5$  Hz, 1H), 7.20 (d,  $J = 7.5$  Hz, 1H), 7.16 (td,  $J = 7.4, 1.1$  Hz, 1H), 7.11 (t,  $J = 7.4$  Hz, 1H), 7.05 (d,  $J = 7.5$  Hz, 1H), 6.87 (d,  $J = 7.5$  Hz, 1H), 4.43 (s, 2H), 2.27 (s, 3H).

$^{13}\text{C}$  NMR ( $\text{CDCl}_3$ , 150 MHz):  $\delta$  192.60, 142.64, 138.19, 136.49, 134.02, 133.92, 132.34, 130.75, 130.23, 129.42, 126.77, 126.59, 126.17, 35.70, 19.64;

IR (neat): 2362, 2339, 2017, 1694, 1599, 1194, 743  $\text{cm}^{-1}$ ;

HRMS (ESI-TOF):  $m/z$  calculated for  $\text{C}_{15}\text{H}_{15}\text{O}^+$   $[\text{M}+\text{H}]^+$  211.1117, found 211.1110.

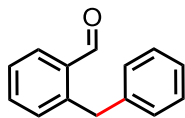

### 2-benzylbenzaldehyde (2e)

The compound **2e** was prepared according to the general procedure and was purified by preparative TLC to give a colorless oil in 70% yield (27 mg).

$^1\text{H}$  NMR ( $\text{CDCl}_3$ , 600 MHz):  $\delta$  10.26 (s, 1H), 7.87 (dd,  $J = 7.7, 1.4$  Hz, 1H), 7.53 (td,  $J = 7.5, 1.5$  Hz, 1H), 7.42 (t,  $J = 7.6$  Hz, 1H), 7.29-7.26 (m, 3H), 7.20 (t,  $J = 7.6$  Hz, 1H), 7.14 (d,  $J = 7.5$  Hz, 2H), 4.46 (s, 2H);

$^{13}\text{C}$  NMR ( $\text{CDCl}_3$ , 150 MHz):  $\delta$  192.37, 142.98, 140.26, 133.91, 132.03, 131.65, 128.77, 128.56, 126.99, 126.28, 38.03;

IR (neat): 2360, 2341, 1695, 1597, 1195, 755, 730  $\text{cm}^{-1}$ ;

HRMS (ESI-TOF):  $m/z$  calculated for  $\text{C}_{14}\text{H}_{13}\text{O}^+$   $[\text{M}+\text{H}]^+$  197.0961, found 197.0956.

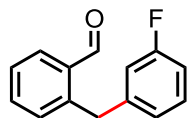

### 2-(3-fluorobenzyl)benzaldehyde (2f)

The compound **2f** was prepared according to the general procedure and was purified by preparative TLC to give a colorless oil in 81% yield (35 mg).

$^1\text{H}$  NMR ( $\text{CDCl}_3$ , 400 MHz):  $\delta$  10.20 (s, 1H), 7.86 (d,  $J = 7.6$  Hz, 1H), 7.54 (td,  $J = 7.6, 1.6$  Hz, 1H), 7.45 (t,  $J = 7.6$  Hz, 1H), 7.27-7.20 (m, 2H), 6.94 (d,  $J = 7.6$  Hz, 1H), 6.90-6.86 (m, 1H), 6.82 (d,  $J = 10.0$  Hz, 1H), 4.45 (s, 2H);

$^{13}\text{C}$  NMR ( $\text{CDCl}_3$ , 100 MHz):  $\delta$  192.41, 162.95 (d,  $J_{\text{CF}} = 245.9$  Hz), 142.81 (d,  $J_{\text{CF}} = 7.3$  Hz), 141.95, 133.93, 133.88, 132.96, 131.69, 129.88 (d,  $J_{\text{CF}} = 8.3$  Hz), 127.25, 124.41 (d,  $J_{\text{CF}} = 2.7$  Hz), 115.65 (d,  $J_{\text{CF}} = 21.4$  Hz), 113.15 (d,  $J_{\text{CF}} = 21.0$  Hz), 37.82 (d,  $J_{\text{CF}} = 1.8$  Hz);

$^{19}\text{F}$  NMR ( $\text{CDCl}_3$ , 376 MHz):  $\delta$  -113.58;

IR (neat): 2829, 1697, 1614, 1589, 1486, 1448, 1247, 770, 749  $\text{cm}^{-1}$ ;

HRMS (ESI-TOF):  $m/z$  calculated for  $\text{C}_{14}\text{H}_{12}\text{FO}^+$   $[\text{M}+\text{H}]^+$  215.0867, found 215.0869.

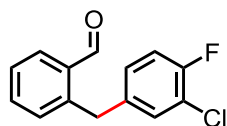

### 2-(3-chloro-4-fluorobenzyl)benzaldehyde (2g)

The compound **2g** was prepared according to the general procedure and was purified by preparative TLC to give a colorless oil in 79% yield (39 mg).

$^1\text{H}$  NMR ( $\text{CDCl}_3$ , 400 MHz):  $\delta$  10.16 (s, 1H), 7.85 (d,  $J = 7.5$  Hz, 1H), 7.56 (t,  $J = 7.5$  Hz, 1H), 7.47 (t,  $J = 7.5$  Hz, 1H), 7.25 (d,  $J = 6.8$  Hz, 1H), 7.16 (d,  $J = 6.8$  Hz, 1H), 7.02-7.03 (m, 2H), 4.40 (s, 2H);

$^{13}\text{C}$  NMR ( $\text{CDCl}_3$ , 150 MHz):  $\delta$  192.60, 156.69 (d,  $J_{\text{CF}} = 246.5$  Hz), 141.65, 137.28 (d,  $J_{\text{CF}} = 3.8$  Hz), 133.99, 133.84, 133.78, 131.65, 130.68, 128.43 (d,  $J_{\text{CF}} = 6.6$  Hz), 127.39, 120.80 (d,  $J_{\text{CF}} = 17.6$  Hz), 116.43 (d,  $J_{\text{CF}} = 20.9$  Hz), 37.22;

$^{19}\text{F}$  NMR ( $\text{CDCl}_3$ , 376 MHz):  $\delta$  -119.55;

IR (neat): 2924, 1697, 1599, 1498, 1406, 1246, 783, 753  $\text{cm}^{-1}$ ;

HRMS (ESI-TOF):  $m/z$  calculated for  $\text{C}_{14}\text{H}_{11}\text{ClFO}^+$   $[\text{M}+\text{H}]^+$  249.0477, found 249.0480.

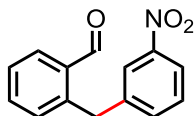

### 2-(3-nitrobenzyl)benzaldehyde (2h)

The compound **2h** was prepared according to the general procedure and was purified by preparative TLC to give a colorless oil in 83% yield (40 mg).

$^1\text{H NMR}$  ( $\text{CDCl}_3$ , 400 MHz):  $\delta$  10.13 (s, 1H), 8.04 (d,  $J = 8.0$  Hz, 1H), 7.99 (s, 1H), 7.86 (d,  $J = 7.2$  Hz, 1H), 7.57-7.61 (m, 1H), 7.49-7.53 (m, 2H), 7.41-7.45 (m, 1H), 7.31 (d,  $J = 7.6$  Hz, 1H), 4.55 (s, 2H);

$^{13}\text{C NMR}$  ( $\text{CDCl}_3$ , 100 MHz):  $\delta$  192.72, 148.34, 142.36, 140.69, 135.07, 134.69, 134.06, 133.81, 131.87, 129.22, 127.65, 123.49, 121.35, 38.01;

IR (neat): 2923, 1692, 1522, 1344, 1192, 1096, 803, 754, 726  $\text{cm}^{-1}$ ;

HRMS (ESI-TOF):  $m/z$  calculated for  $\text{C}_{14}\text{H}_{12}\text{NO}_3^+$   $[\text{M}+\text{H}]^+$  242.0812, found 242.0816.

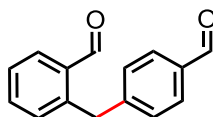

### 2-(4-formylbenzyl)benzaldehyde (2i)

The compound **2i** was prepared according to the general procedure and was purified by preparative TLC to give a colorless oil in 81% yield (36 mg).

$^1\text{H NMR}$  ( $\text{CDCl}_3$ , 600 MHz):  $\delta$  10.16 (s, 1H), 9.96 (s, 1H), 7.86 (dd,  $J = 7.6, 1.5$  Hz, 1H), 7.79 (d,  $J = 8.2$  Hz, 2H), 7.57 (td,  $J = 7.6, 1.5$  Hz, 1H), 7.48 (td,  $J = 7.6, 1.2$  Hz, 1H), 7.32 (d,  $J = 8.0$  Hz, 2H), 7.28 (d,  $J = 7.6$  Hz, 1H), 4.54 (s, 2H);

$^{13}\text{C NMR}$  ( $\text{CDCl}_3$ , 150 MHz):  $\delta$  192.56, 191.87, 147.57, 141.28, 134.69, 133.97, 133.89, 133.81, 131.85, 129.98, 129.41, 127.43, 38.48;

IR (neat): 1686, 1598, 1573, 1304, 1210, 1167, 1108, 848, 751  $\text{cm}^{-1}$ ;

HRMS (ESI-TOF):  $m/z$  calculated for  $\text{C}_{15}\text{H}_{13}\text{O}_2^+$   $[\text{M}+\text{H}]^+$  225.0910, found 225.0908.

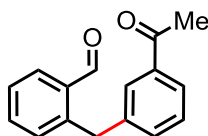

### 2-(3-acetylbenzyl)benzaldehyde (2j)

The compound **2j** was prepared according to the general procedure and was purified by preparative TLC to give a colorless oil in 76% yield (36 mg).

$^1\text{H NMR}$  ( $\text{CDCl}_3$ , 400 MHz):  $\delta$  10.20 (s, 1H), 7.85 (d,  $J = 7.6$  Hz, 1H), 7.78-7.89 (m, 2H), 7.55 (t,  $J = 7.6$  Hz, 1H), 7.45 (t,  $J = 7.6$  Hz, 1H), 7.34-7.39 (m, 2H), 7.27 (d,  $J = 6.8$  Hz, 1H), 4.51 (s, 2H), 2.56 (s, 3H);

$^{13}\text{C NMR}$  ( $\text{CDCl}_3$ , 100 MHz):  $\delta$  198.11, 192.53, 142.02, 140.86, 137.35, 133.96, 133.83, 133.56, 133.33,

131.66, 128.72, 128.51, 127.23, 126.41, 38.00, 26.64;

IR (neat): 2923, 1679, 1597, 1434, 1357, 1269, 1193, 755, 692  $\text{cm}^{-1}$ ;

HRMS (ESI-TOF):  $m/z$  calculated for  $\text{C}_{16}\text{H}_{15}\text{O}_2^+$   $[\text{M}+\text{H}]^+$  239.1067, found 239.1066.

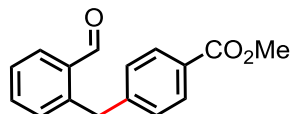

#### methyl 4-(2-formylbenzyl)benzoate (**2k**)

The compound **2k** was prepared according to the general procedure and was purified by preparative TLC to give a colorless oil in 74% yield (38 mg).

$^1\text{H}$  NMR ( $\text{CDCl}_3$ , 400 MHz):  $\delta$  10.18 (s, 1H), 7.94 (d,  $J = 8.0$  Hz, 2H), 7.86 (d,  $J = 7.6$  Hz, 1H), 7.53-7.57 (m, 1H), 7.46 (t,  $J = 7.6$  Hz, 1H), 7.26 (d,  $J = 8.0$  Hz, 1H), 7.21 (d,  $J = 8.0$  Hz, 2H), 4.51 (s, 2H), 3.89 (s, 3H);

$^{13}\text{C}$  NMR ( $\text{CDCl}_3$ , 100 MHz):  $\delta$  192.45, 166.94, 145.65, 141.76, 133.93, 133.91, 133.26, 131.74, 129.82, 128.80, 128.22, 127.28, 52.01, 38.21;

IR (neat): 2925, 1717, 1696, 1610, 1434, 1279, 1193, 1109, 749  $\text{cm}^{-1}$ ;

HRMS (ESI-TOF):  $m/z$  calculated for  $\text{C}_{16}\text{H}_{15}\text{O}_3^+$   $[\text{M}+\text{H}]^+$  255.1016, found 255.1018.

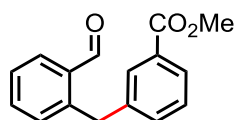

#### methyl 3-(2-formylbenzyl)benzoate (**2l**)

The compound **2l** was prepared according to the general procedure and was purified by preparative TLC to give a colorless oil in 78% yield (40 mg).

$^1\text{H}$  NMR ( $\text{CDCl}_3$ , 400 MHz):  $\delta$  10.21 (s, 1H), 7.88-7.84 (m, 3H), 7.54 (t,  $J = 7.6$  Hz, 1H), 7.44 (t,  $J = 7.6$  Hz, 1H), 7.37-7.32 (m, 2H), 7.26 (d,  $J = 7.6$  Hz, 1H), 4.50 (s, 2H), 3.88 (s, 3H);

$^{13}\text{C}$  NMR ( $\text{CDCl}_3$ , 100 MHz):  $\delta$  192.46, 167.01, 142.11, 140.61, 133.95, 133.83, 133.42, 133.09, 131.65, 130.38, 129.84, 128.56, 127.55, 127.19, 52.07, 37.90;

IR (neat): 2922, 1716, 1692, 1597, 1433, 1280, 1195, 1106, 987, 741  $\text{cm}^{-1}$ ;

HRMS (ESI-TOF):  $m/z$  calculated for  $\text{C}_{16}\text{H}_{15}\text{O}_3^+$   $[\text{M}+\text{H}]^+$  255.1016, found 255.1014.

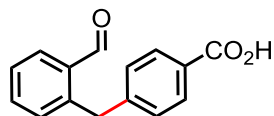

#### 4-(2-formylbenzyl)benzoic acid (**2m**)

The compound **2m** was prepared according to the general procedure and was purified by preparative TLC to give a colorless oil in 73% yield (35 mg).

$^1\text{H NMR}$  ( $\text{CDCl}_3$ , 400 MHz):  $\delta$  10.18 (s, 1H), 8.01 (d,  $J = 8.0$  Hz, 2H), 7.86 (d,  $J = 7.6$  Hz, 1H), 7.57-7.53 (m, 1H), 7.46 (t,  $J = 7.4$  Hz, 1H), 7.28-7.24 (m, 3H), 4.53 (s, 2H);

$^{13}\text{C NMR}$  ( $\text{CDCl}_3$ , 100 MHz):  $\delta$  192.56, 171.97, 146.69, 141.56, 133.97, 133.88, 133.49, 131.78, 130.45, 128.91, 127.34, 38.30;

IR (neat): 2920, 1686, 1610, 1418, 1279, 1178, 1046, 749  $\text{cm}^{-1}$ ;

HRMS (ESI-TOF):  $m/z$  calculated for  $\text{C}_{15}\text{H}_{11}\text{O}_3^-$   $[\text{M}-\text{H}]^-$  239.0714, found 239.0711.

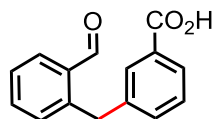

#### 3-(2-formylbenzyl)benzoic acid (**2n**)

The compound **2n** was prepared according to the general procedure and was purified by preparative TLC to give a colorless oil in 74% yield (36 mg).

$^1\text{H NMR}$  ( $\text{CDCl}_3$ , 400 MHz):  $\delta$  10.20 (s, 1H), 7.94 (d,  $J = 7.6$  Hz, 1H), 7.91 (s, 1H), 7.86 (d,  $J = 7.6$  Hz, 1H), 7.55 (t,  $J = 7.6$  Hz, 1H), 7.47-7.36 (m, 3H), 7.27 (d,  $J = 8.0$  Hz, 1H), 4.52 (s, 2H);

$^{13}\text{C NMR}$  ( $\text{CDCl}_3$ , 100 MHz):  $\delta$  192.59, 172.01, 141.96, 140.79, 134.34, 134.00, 133.83, 133.35, 131.69, 130.41, 129.52, 128.68, 128.19, 127.27, 37.90.

IR (neat): 2922, 1692, 1598, 1451, 1411, 1289, 1196, 744  $\text{cm}^{-1}$ ;

HRMS (ESI-TOF):  $m/z$  calculated for  $\text{C}_{15}\text{H}_{11}\text{O}_3^-$   $[\text{M}-\text{H}]^-$  239.0714, found 239.0715.

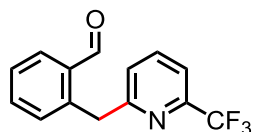

#### 2-((6-(trifluoromethyl)pyridin-2-yl)methyl)benzaldehyde (**2o**)

The compound **2o** was prepared according to the general procedure for 48 h and was purified by preparative TLC to give a colorless oil in 71% yield (38 mg).

$^1\text{H NMR}$  ( $\text{CDCl}_3$ , 600 MHz):  $\delta$  10.27 (s, 1H), 7.87 (dd,  $J = 7.6, 1.5$  Hz, 1H), 7.73 (t,  $J = 7.8$  Hz, 1H), 7.56 (td,  $J = 7.5, 1.5$  Hz, 1H), 7.49 (dd,  $J = 7.7, 0.9$  Hz, 1H), 7.46 (td,  $J = 7.6, 1.2$  Hz, 1H), 7.40 (d,  $J = 7.6$  Hz, 1H), 7.29 (d,  $J = 7.9$  Hz, 1H), 4.69 (s, 2H);

$^{13}\text{C NMR}$  ( $\text{CDCl}_3$ , 150 MHz):  $\delta$  192.75, 160.89, 147.75 (q,  $J_{\text{CF}} = 34.4$  Hz), 140.09, 137.79, 134.11,

133.97, 133.00, 132.05, 127.50, 125.84, 121.44 (q,  $J_{CF} = 274.0$  Hz), 118.03 (q,  $J_{CF} = 2.5$  Hz), 40.53;  
 $^{19}\text{F}$  NMR ( $\text{CDCl}_3$ , 376 MHz):  $\delta -68.31$ ;  
IR (neat): 2945, 1693, 1461, 1341, 1182, 1134, 1022, 748  $\text{cm}^{-1}$ ;  
HRMS (ESI-TOF):  $m/z$  calculated for  $\text{C}_{14}\text{H}_{11}\text{F}_3\text{NO}^+$   $[\text{M}+\text{H}]^+$  266.0787, found 266.0787.

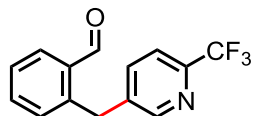

### 2-((6-(trifluoromethyl)pyridin-3-yl)methyl)benzaldehyde (2p)

The compound **2p** was prepared according to the general procedure for 48 h and was purified by preparative TLC to give a colorless oil in 68% yield (36 mg).

$^1\text{H}$  NMR ( $\text{CDCl}_3$ , 600 MHz):  $\delta$  10.10 (s, 1H), 8.58 (d,  $J = 1.3$  Hz, 1H), 7.85 (dd,  $J = 7.5, 1.5$  Hz, 1H), 7.64 (dd,  $J = 8.1, 1.5$  Hz, 1H), 7.59 (td,  $J = 7.5, 1.5$  Hz, 1H), 7.57 (d,  $J = 8.1$  Hz, 1H), 7.52 (td,  $J = 7.5, 1.1$  Hz, 1H); 7.30 (d,  $J = 7.5$  Hz, 1H), 4.53 (s, 2H);

$^{13}\text{C}$  NMR ( $\text{CDCl}_3$ , 150 MHz):  $\delta$  192.91, 150.34, 146.10 (q,  $J_{CF} = 35.1$  Hz), 140.00, 139.18, 137.41, 135.45, 134.07, 133.79, 131.88, 127.81, 121.61 (q,  $J_{CF} = 273.7$  Hz), 120.13 (q,  $J_{CF} = 2.8$  Hz), 35.73;

$^{19}\text{F}$  NMR ( $\text{CDCl}_3$ , 376 MHz):  $\delta -68.05$ ;

IR (neat): 2937, 1449, 1337, 1127, 1085, 1019, 746, 686  $\text{cm}^{-1}$ ;

HRMS (ESI-TOF):  $m/z$  calculated for  $\text{C}_{14}\text{H}_{11}\text{F}_3\text{NO}^+$   $[\text{M}+\text{H}]^+$  266.0787, found 266.0781.

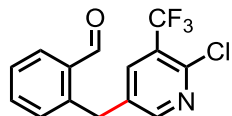

### 2-((6-chloro-5-(trifluoromethyl)pyridin-3-yl)methyl)benzaldehyde (2q)

The compound **2q** was prepared according to the general procedure for 48 h and was purified by preparative TLC to give a colorless oil in 52% yield (31 mg).

$^1\text{H}$  NMR ( $\text{CDCl}_3$ , 600 MHz):  $\delta$  10.07 (s, 1H), 8.41 (d,  $J = 2.1$  Hz, 1H), 7.85 (dd,  $J = 7.5, 1.5$  Hz, 1H), 7.80 (d,  $J = 2.3$  Hz, 1H), 7.62 (td,  $J = 7.5, 1.5$  Hz, 1H), 7.55 (td,  $J = 7.5, 1.5$  Hz, 1H), 7.32 (d,  $J = 7.5$  Hz, 1H), 4.48 (s, 2H);

$^{13}\text{C}$  NMR ( $\text{CDCl}_3$ , 150 MHz):  $\delta$  193.08, 152.39, 146.57, 139.39, 136.79 (q,  $J_{CF} = 4.7$  Hz), 136.11, 135.05, 134.18, 133.69, 131.85, 128.06, 124.81 (q,  $J_{CF} = 33.0$  Hz), 122.13 (d,  $J_{CF} = 272.9$  Hz), 35.15;

$^{19}\text{F}$  NMR ( $\text{CDCl}_3$ , 376 MHz):  $\delta -63.91$ ;

IR (neat): 2926, 1696, 1575, 1436, 1322, 1241, 1131, 1047, 752, 659  $\text{cm}^{-1}$ ;

HRMS (ESI-TOF):  $m/z$  calculated for  $\text{C}_{14}\text{H}_{10}\text{ClF}_3\text{NO}^+$   $[\text{M}+\text{H}]^+$  300.0398, found 300.0394.



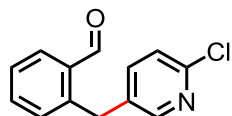

### 2-((6-chloropyridin-3-yl)methyl)benzaldehyde (2r)

The compound **2n** was prepared according to the general procedure for 48 h and was purified by preparative TLC to give a colorless oil in 57% yield (26 mg).

$^1\text{H}$  NMR ( $\text{CDCl}_3$ , 400 MHz):  $\delta$  10.16 (s, 1H), 8.24 (d,  $J = 2.4$  Hz, 1H), 7.84 (dd,  $J = 7.6$ , 1.6 Hz, 1H), 7.57 (td,  $J = 7.6$ , 1.6 Hz, 1H), 7.49 (td,  $J = 7.6$ , 1.6 Hz, 1H), 7.44 (dd,  $J = 8.0$ , 2.4 Hz, 1H), 7.27 (d,  $J = 7.6$  Hz, 1H), 7.27 (d,  $J = 8.4$  Hz, 1H), 4.43 (s, 2H);

$^{13}\text{C}$  NMR ( $\text{CDCl}_3$ , 100 MHz):  $\delta$  192.81, 149.84, 149.32, 140.69, 139.18, 134.98, 134.74, 134.00, 133.74, 131.66, 127.60, 123.94, 34.98;

IR (neat): 2983, 1734, 1460, 1373, 1238, 1044, 915, 731, 647  $\text{cm}^{-1}$ ;

HRMS (ESI-TOF):  $m/z$  calculated for  $\text{C}_{13}\text{H}_{11}\text{ClNO}^+$   $[\text{M}+\text{H}]^+$  232.0524, found 232.0523.

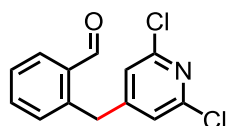

### 2-((2,6-dichloropyridin-4-yl)methyl)benzaldehyde (2s)

The compound **2s** was prepared according to the general procedure for 48 h and was purified by preparative TLC to give a colorless oil in 47% yield (25 mg).

$^1\text{H}$  NMR ( $\text{CDCl}_3$ , 400 MHz):  $\delta$  10.06 (s, 1H), 7.86 (dd,  $J = 7.2$ , 1.2 Hz, 1H), 7.72 (td,  $J = 7.2$  Hz,  $J = 1.2$  Hz, 1H), 7.57 (t,  $J = 7.6$  Hz, 1H), 7.30 (d,  $J = 7.5$  Hz, 1H), 7.03 (s, 2H), 4.41 (s, 2H);

$^{13}\text{C}$  NMR ( $\text{CDCl}_3$ , 150 MHz):  $\delta$  192.91, 155.35, 138.30, 135.80, 134.16, 133.81, 132.21, 132.20, 128.22, 122.99, 37.62;

IR (neat): 2922, 1697, 1581, 1541, 1377, 1168, 774, 732, 649  $\text{cm}^{-1}$ ;

HRMS (ESI-TOF):  $m/z$  calculated for  $\text{C}_{13}\text{H}_{10}\text{Cl}_2\text{NO}^+$   $[\text{M}+\text{H}]^+$  266.0134, found 266.0131.

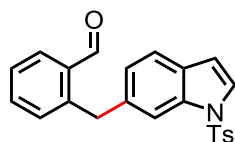

### 2-((1-tosyl-1H-indol-6-yl)methyl)benzaldehyde (2t)

The compound **2t** was prepared according to the general procedure for 48 h and was purified by preparative TLC to give a colorless oil in 72% yield (56 mg).

$^1\text{H}$  NMR ( $\text{CDCl}_3$ , 400 MHz):  $\delta$  10.22 (s, 1H), 7.89 (d,  $J = 7.6$  Hz, 1H), 7.72 (s, 1H), 7.61 (d,  $J = 8.4$  Hz, 2H), 7.55 (t,  $J = 7.6$  Hz, 1H), 7.49 (d,  $J = 3.6$  Hz, 1H), 7.46 (t,  $J = 7.6$  Hz, 1H), 7.40 (d,  $J = 8.0$  Hz, 1H), 7.26 (d,  $J = 7.6$  Hz, 1H), 7.16 (d,  $J = 8.0$  Hz, 2H), 7.05 (d,  $J = 8.4$  Hz, 1H), 6.58 (d,  $J = 3.6$  Hz, 1H), 4.56

(s, 2H), 2.34 (s, 3H);

$^{13}\text{C}$  NMR ( $\text{CDCl}_3$ , 100 MHz):  $\delta$  192.19, 144.86, 143.16, 137.11, 135.07, 134.92, 133.93, 133.85, 132.06, 131.63, 129.80, 129.14, 127.05, 126.76, 126.22, 124.38, 121.29, 113.76, 108.80, 38.36, 21.54;

HRMS (ESI-TOF):  $m/z$  calculated for  $\text{C}_{23}\text{H}_{20}\text{NO}_3\text{S}^+$   $[\text{M}+\text{H}]^+$  390.1158, found 390.1154.

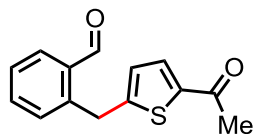

### 2-((5-acetylthiophen-2-yl)methyl)benzaldehyde (2u)

The compound **2u** was prepared according to the general procedure for 48 h and was purified by preparative TLC to give a colorless oil in 58% yield (28 mg).

$^1\text{H}$  NMR ( $\text{CDCl}_3$ , 400 MHz):  $\delta$  10.16 (s, 1H), 7.84 (d,  $J = 7.6$  Hz, 1H), 7.57 (t,  $J = 7.6$  Hz, 1H), 7.51-7.49 (m, 2H), 7.35 (d,  $J = 7.6$  Hz, 1H), 6.83 (d,  $J = 7.6$  Hz, 1H), 4.63 (s, 2H), 2.48 (s, 3H);

$^{13}\text{C}$  NMR ( $\text{CDCl}_3$ , 100 MHz):  $\delta$  192.56, 190.43, 153.06, 142.94, 140.64, 134.19, 134.08, 133.54, 132.67, 131.43, 127.79, 126.62, 33.50, 26.45;

IR (neat): 2923, 1694, 1651, 1448, 1359, 1276, 1195, 1209, 909, 751, 659  $\text{cm}^{-1}$ ;

HRMS (ESI-TOF):  $m/z$  calculated for  $\text{C}_{14}\text{H}_{13}\text{O}_2\text{S}^+$   $[\text{M}+\text{H}]^+$  245.0631, found 245.0632.

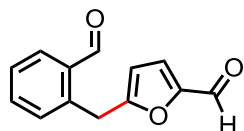

### 5-(2-formylbenzyl)furan-2-carbaldehyde (2v)

The compound **2v** was prepared according to the general procedure for 48 h and was purified by preparative TLC to give a colorless oil in 54% yield (23 mg).

$^1\text{H}$  NMR ( $\text{CDCl}_3$ , 400 MHz):  $\delta$  10.16 (s, 1H), 9.53 (s, 1H), 7.85 (d,  $J = 7.6$  Hz, 1H), 7.58 (t,  $J = 7.2$  Hz, 1H), 7.51 (t,  $J = 7.6$  Hz, 1H), 7.37 (d,  $J = 7.6$  Hz, 1H), 7.14 (d,  $J = 3.6$  Hz, 1H), 6.20 (d,  $J = 3.2$  Hz, 1H), 4.55 (s, 2H);

$^{13}\text{C}$  NMR ( $\text{CDCl}_3$ , 125 MHz):  $\delta$  192.64, 177.17, 160.89, 152.19, 137.74, 134.38, 134.07, 133.77, 131.75, 127.91, 110.15, 31.76;

IR (neat): 2937, 1672, 1599, 1513, 1398, 1248, 1194, 1022, 790, 755  $\text{cm}^{-1}$ ;

HRMS (ESI-TOF):  $m/z$  calculated for  $\text{C}_{13}\text{H}_{11}\text{O}_3^+$   $[\text{M}+\text{H}]^+$  215.0703, found 215.0699.

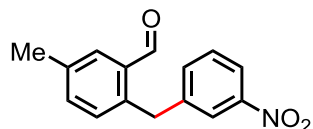

#### 5-methyl-2-(3-nitrobenzyl)benzaldehyde (2w)

The compound **2w** was prepared according to the general procedure and was purified by preparative TLC to give a colorless oil in 77% yield (39 mg).

$^1\text{H}$  NMR ( $\text{CDCl}_3$ , 600 MHz):  $\delta$  10.09 (s, 1H), 8.05-8.02 (m, 1H), 7.97 (s, 1H), 7.65 (d,  $J = 2.0$  Hz, 1H), 7.51 (d,  $J = 7.6$  Hz, 1H), 7.42 (t,  $J = 7.8$  Hz, 1H), 7.39 (dd,  $J = 7.8, 1.5$  Hz, 1H), 7.19 (d,  $J = 7.7$  Hz, 1H), 4.50 (s, 2H), 2.44 (s, 3H);

$^{13}\text{C}$  NMR ( $\text{CDCl}_3$ , 150 MHz):  $\delta$  192.84, 148.31, 142.70, 137.69, 137.52, 135.12, 135.01, 134.80, 133.62, 131.87, 129.16, 123.39, 121.25, 37.59, 20.77;

IR (neat): 2928, 1692, 1610, 1526, 1350, 1156, 909, 729  $\text{cm}^{-1}$ ;

HRMS (ESI-TOF):  $m/z$  calculated for  $\text{C}_{15}\text{H}_{14}\text{NO}_3^+$   $[\text{M}+\text{H}]^+$  256.0968, found 256.0974.

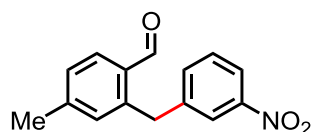

#### 4-methyl-2-(3-nitrobenzyl)benzaldehyde (2x)

The compound **2x** was prepared according to the general procedure and was purified by preparative TLC to give a colorless oil in 84% yield (43 mg).

$^1\text{H}$  NMR ( $\text{CDCl}_3$ , 400 MHz):  $\delta$  10.06 (s, 1H), 8.04 (d,  $J = 8.0$  Hz, 1H), 7.99 (s, 1H), 7.74 (d,  $J = 7.6$  Hz, 1H), 7.52 (d,  $J = 8.0$  Hz, 1H), 7.42 (t,  $J = 8.0$  Hz, 1H), 7.30 (d,  $J = 8.0$  Hz, 1H), 7.10 (s, 1H), 4.51 (s, 2H), 2.43 (s, 3H);

$^{13}\text{C}$  NMR ( $\text{CDCl}_3$ , 100 MHz):  $\delta$  192.31, 148.34, 145.19, 142.53, 140.65, 135.08, 135.02, 132.71, 131.57, 129.17, 128.34, 123.46, 121.30, 37.99, 21.78;

IR (neat): 2925, 1693, 1607, 1527, 1348, 1218, 1096, 804, 729  $\text{cm}^{-1}$ ;

HRMS (ESI-TOF):  $m/z$  calculated for  $\text{C}_{15}\text{H}_{14}\text{NO}_3^+$   $[\text{M}+\text{H}]^+$  256.0968, found 256.0970.

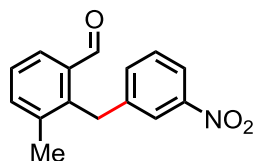

#### 3-methyl-2-(3-nitrobenzyl)benzaldehyde (2y)

The compound **2y** was prepared according to the general procedure and was purified by preparative TLC to give a colorless oil in 73% yield (37 mg).

$^1\text{H}$  NMR ( $\text{CDCl}_3$ , 400 MHz):  $\delta$  10.14 (s, 1H), 8.02 (d,  $J = 8.0$  Hz, 1H), 7.86 (s, 1H), 7.75 (d,  $J = 7.6$  Hz, 1H), 7.51-7.37 (m, 4H), 4.62 (s, 2H), 2.31 (s, 3H);

$^{13}\text{C}$  NMR ( $\text{CDCl}_3$ , 100 MHz):  $\delta$  193.17, 148.41, 141.79, 139.00, 138.23, 136.31, 134.62, 134.31, 132.64, 129.21, 127.57, 122.81, 121.20, 33.31, 19.55;  
IR (neat): 2982, 1735, 1696, 1529, 1372, 1349, 1236, 1043, 847, 786, 729, 634, 607  $\text{cm}^{-1}$ ;  
HRMS (ESI-TOF):  $m/z$  calculated for  $\text{C}_{15}\text{H}_{14}\text{NO}_3^+$   $[\text{M}+\text{H}]^+$  256.0968, found 256.0973.

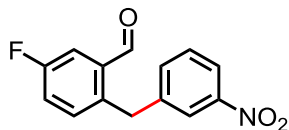

#### 5-fluoro-2-(3-nitrobenzyl)benzaldehyde (2z)

The compound **2z** was prepared according to the general procedure and was purified by preparative TLC to give a colorless oil in 64% yield (33 mg).

$^1\text{H}$  NMR ( $\text{CDCl}_3$ , 400 MHz):  $\delta$  10.10 (s, 1H), 8.06 (d,  $J = 7.6$  Hz, 1H), 7.97 (s, 1H), 7.56 (d,  $J = 8.4$  Hz, 1H), 7.50-7.43 (m, 2H), 7.31-7.29 (m, 2H), 4.51 (s, 2H);

$^{13}\text{C}$  NMR ( $\text{CDCl}_3$ , 100 MHz):  $\delta$  190.88, 161.90 (d,  $J_{\text{CF}} = 247.9$  Hz), 148.43, 142.08, 136.51 (d,  $J_{\text{CF}} = 3.6$  Hz), 135.29 (d,  $J_{\text{CF}} = 5.6$  Hz), 134.86, 133.67 (d,  $J_{\text{CF}} = 7.0$  Hz), 129.42, 123.37, 121.57, 121.16 (d,  $J_{\text{CF}} = 21.0$  Hz), 119.89 (d,  $J_{\text{CF}} = 21.9$  Hz), 37.20;

$^{19}\text{F}$  NMR ( $\text{CDCl}_3$ , 376 MHz):  $\delta$  -113.80;

IR (neat): 2926, 1696, 1575, 1436, 1322, 1241, 1131, 1047, 752, 659  $\text{cm}^{-1}$ ;

HRMS (ESI-TOF):  $m/z$  calculated for  $\text{C}_{14}\text{H}_{11}\text{FNO}_3^+$   $[\text{M}+\text{H}]^+$  260.0717, found 260.0710.

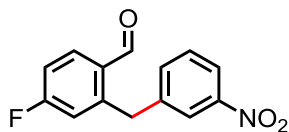

#### 4-fluoro-2-(3-nitrobenzyl)benzaldehyde (2aa)

The compound **2aa** was prepared according to the general procedure and was purified by preparative TLC to give a colorless oil in 76% yield (39 mg).

$^1\text{H}$  NMR ( $\text{CDCl}_3$ , 400 MHz):  $\delta$  10.09 (s, 1H), 8.08 (d,  $J = 8.0$  Hz, 1H), 8.01 (s, 1H), 7.89 (dd,  $J = 8.4, 2.0$  Hz, 1H), 7.52 (d,  $J = 7.6$  Hz, 1H), 7.47 (t,  $J = 7.6$  Hz, 1H), 7.17 (td,  $J = 8.0, 2.4$  Hz, 1H), 6.97 (dd,  $J = 9.2, 2.4$  Hz, 1H), 4.56 (s, 2H);

$^{13}\text{C}$  NMR ( $\text{CDCl}_3$ , 100 MHz):  $\delta$  190.99, 165.68 (d,  $J_{\text{CF}} = 256.7$  Hz), 148.43, 144.30 (d,  $J_{\text{CF}} = 8.8$  Hz), 141.39, 137.35 (d,  $J_{\text{CF}} = 10.1$  Hz), 135.06, 130.44 (d,  $J_{\text{CF}} = 2.7$  Hz), 129.45, 123.55, 121.67, 118.91 (d,  $J_{\text{CF}} = 22.2$  Hz), 114.73 (d,  $J_{\text{CF}} = 21.6$  Hz), 37.82 (d,  $J_{\text{CF}} = 1.6$  Hz);

$^{19}\text{F}$  NMR ( $\text{CDCl}_3$ , 376 MHz):  $\delta$  -102.63;

IR (neat): 2868, 1696, 1605, 1583, 1528, 1349, 1244, 805, 727  $\text{cm}^{-1}$ ;

HRMS (ESI-TOF):  $m/z$  calculated for  $\text{C}_{14}\text{H}_{11}\text{FNO}_3^+$   $[\text{M}+\text{H}]^+$  260.0717, found 260.0722.

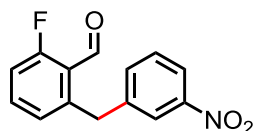

#### 2-fluoro-6-(3-nitrobenzyl)benzaldehyde (**2ab**)

The compound **2ab** was prepared according to the general procedure and was purified by preparative TLC to give a colorless oil in 81% yield (42 mg).

$^1\text{H}$  NMR ( $\text{CDCl}_3$ , 400 MHz):  $\delta$  10.49 (s, 1H), 8.05 (d,  $J = 8.4$  Hz, 1H), 7.99 (s, 1H), 7.59-7.53 (m, 2H), 7.44 (t,  $J = 8.0$  Hz, 1H), 7.14 (dd,  $J = 10.7, 8.4$  Hz, 1H), 7.07 (d,  $J = 7.6$  Hz, 1H), 4.51 (s, 2H);

$^{13}\text{C}$  NMR ( $\text{CDCl}_3$ , 100 MHz):  $\delta$  188.61 (d,  $J_{\text{CF}} = 11.9$  Hz), 166.83 (d,  $J_{\text{CF}} = 257.3$  Hz), 148.32, 142.52, 141.84, 135.67 (d,  $J_{\text{CF}} = 10.3$  Hz), 135.22, 129.17, 127.62 (d,  $J_{\text{CF}} = 3.4$  Hz), 123.52, 122.09 (d,  $J_{\text{CF}} = 5.5$  Hz), 121.41, 115.27 (d,  $J_{\text{CF}} = 21.7$  Hz), 38.38 (d,  $J_{\text{CF}} = 2.2$  Hz);

$^{19}\text{F}$  NMR ( $\text{CDCl}_3$ , 376 MHz):  $\delta$  -120.44;

IR (neat): 2887, 1697, 1611, 1572, 1527, 1350, 1255, 910, 818, 727  $\text{cm}^{-1}$ ;

HRMS (ESI-TOF):  $m/z$  calculated for  $\text{C}_{14}\text{H}_{11}\text{FNO}_3^+$   $[\text{M}+\text{H}]^+$  260.0717, found 260.0720.

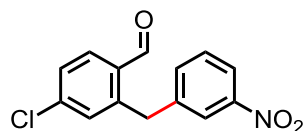

#### 4-chloro-2-(3-nitrobenzyl)benzaldehyde (**2ac**)

The compound **2ac** was prepared according to the general procedure and was purified by preparative TLC to give a colorless oil in 60% yield (33 mg).

$^1\text{H}$  NMR ( $\text{CDCl}_3$ , 400 MHz):  $\delta$  10.09 (s, 1H), 8.08 (d,  $J = 8.0$  Hz, 1H), 8.00 (s, 1H), 7.80 (d,  $J = 8.4$  Hz, 1H), 7.52-7.44 (m, 3H), 7.27-7.26 (m, 1H), 4.53 (s, 2H);

$^{13}\text{C}$  NMR ( $\text{CDCl}_3$ , 100 MHz):  $\delta$  191.31, 148.44, 142.55, 141.42, 140.53, 135.75, 135.01, 132.21, 131.87, 129.45, 127.97, 123.53, 121.69, 37.68;

IR (neat): 2926, 1590, 1561, 1528, 1349, 1196, 1092, 913, 804, 728  $\text{cm}^{-1}$ ;

HRMS (ESI-TOF):  $m/z$  calculated for  $\text{C}_{14}\text{H}_{11}\text{ClNO}_3^+$   $[\text{M}+\text{H}]^+$  276.0422, found 276.0425.

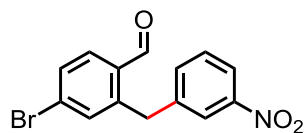

#### 4-bromo-2-(3-nitrobenzyl)benzaldehyde (**2ad**)

The compound **2ad** was prepared according to the general procedure and was purified by preparative TLC to give a colorless oil in 68% yield (44 mg).

$^1\text{H}$  NMR ( $\text{CDCl}_3$ , 400 MHz):  $\delta$  10.09 (s, 1H), 8.08 (d,  $J = 8.0$  Hz, 1H), 8.00 (s, 1H), 7.72 (d,  $J = 8.0$  Hz, 1H), 7.65 (dd,  $J = 8.4, 1.6$  Hz, 1H), 7.51-7.44 (m, 3H), 4.52 (s, 2H);

$^{13}\text{C}$  NMR ( $\text{CDCl}_3$ , 100 MHz):  $\delta$  191.50, 148.42, 142.53, 141.43, 135.71, 134.98, 134.83, 132.58, 131.02, 129.45, 129.41, 123.51, 121.69, 37.60;

IR (neat): 2851, 1697, 1585, 1557, 1526, 1348, 1195, 1080, 879, 805, 727  $\text{cm}^{-1}$ ;

HRMS (ESI-TOF):  $m/z$  calculated for  $\text{C}_{14}\text{H}_{11}\text{BrNO}_3^+$   $[\text{M}+\text{H}]^+$  319.9917, found 319.9916.

### III. Pd(II)-Catalyzed C(sp<sup>3</sup>)-H Arylation of Ketones (Fig. 3)

#### General Procedure

In air, a reaction tube (10 mL) with magnetic stir bar was charged with ketone substrate (0.20 mmol), aryl iodide (0.40 mmol), silver trifluoroacetate (66.3 mg, 0.30 mmol), palladium acetate (4.5 mg, 0.020 mmol) and glycine (7.5 mg, 0.10 mmol), followed by the mixture of HFIP (0.75 mL) and acetic acid (0.25 mL). The reaction tube was sealed and allowed to stir at ambient temperature for 10 minutes, then heated to 110 °C for 36 hours. Upon completion, the reaction mixture was cooled to room temperature, filtered through a silica gel plug, and concentrated *in vacuo*. The crude reaction mixture was purified on silica gel using hexanes/ EtOAc as the eluent to afford the desired product.

**Table S2. Optimization of Pd(II)-Catalyzed C(sp<sup>3</sup>)-H Arylation of Ketones<sup>\*,†</sup>**

| entry | solvent                     | amino acid                    | NMR yield (%)              |
|-------|-----------------------------|-------------------------------|----------------------------|
| 1     | HOAc/H <sub>2</sub> O (9:1) | glycine (40%)                 | <2                         |
| 2     | HOAc                        | glycine (40%)                 | 25                         |
| 3     | HFIP                        | glycine (40%)                 | 19                         |
| 4     | HFIP/HOAc (1:1)             | glycine (40%)                 | 53                         |
| 5     | HFIP/HOAc (3:1)             | glycine (40%)                 | 62                         |
| 6     | HFIP/HOAc (5:1)             | glycine (40%)                 | 57                         |
| 7     | <b>HFIP/HOAc (3:1)</b>      | <b>glycine (50%)</b>          | <b>71 (71)<sup>‡</sup></b> |
| 8     | HFIP/HOAc (3:1)             | glycine (60%)                 | 55                         |
| 9     | HFIP/HOAc (3:1)             | L-alanine (50%)               | 60                         |
| 10    | HFIP/HOAc (3:1)             | L-valine (50%)                | 48                         |
| 11    | HFIP/HOAc (3:1)             | L- <i>tert</i> -leucine (50%) | 44                         |

<sup>\*</sup>Conditions: 0.2 mmol of **3a**, 2.0 equiv of methyl 4-iodobenzoate, 10 mol% of Pd(OAc)<sub>2</sub>, 40-60 mol% amino acid, 1.5 equiv of AgTFA, 1.0 mL of solvent, 110 °C, 36 h. <sup>†</sup>The yield was determined by <sup>1</sup>H NMR analysis of the crude product using CH<sub>2</sub>Br<sub>2</sub> as the internal standard. <sup>‡</sup>isolated yield.

## Full Characterization of Reaction Products and Proof of Stereochemistry

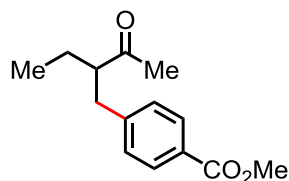

### methyl 4-(2-ethyl-3-oxobutyl)benzoate (**4a**)

The compound **4a** was prepared according to the general procedure and was purified by preparative TLC to give a colorless oil in 71% yield (33 mg).

$^1\text{H NMR}$  (400 MHz,  $\text{CDCl}_3$ )  $\delta$  7.94 (d,  $J = 8.0$  Hz, 2H), 7.21 (d,  $J = 8.0$  Hz, 2H), 3.89 (s, 3H), 2.93 (dd,  $J = 12.4, 7.6$  Hz, 1H), 2.79-2.69 (m, 2H), 2.01 (s, 3H), 1.68-1.62 (m, 1H), 1.56-1.51 (m, 1H), 0.90 (t,  $J = 7.2$  Hz, 3H);

$^{13}\text{C NMR}$  (125 MHz,  $\text{CDCl}_3$ )  $\delta$  211.64, 166.96, 145.30, 129.75, 128.87, 128.24, 55.71, 51.98, 37.10, 30.19, 24.57, 11.43;

IR (neat): 2960, 1715, 1610, 1435, 1278, 1179, 1109, 1020, 764, 706  $\text{cm}^{-1}$ ;

HRMS (ESI-TOF):  $m/z$  calculated for  $\text{C}_{14}\text{H}_{19}\text{O}_3$   $[\text{M}+\text{H}]^+$ : 235.1329; found: 235.1329.

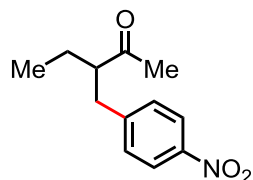

### 3-(4-nitrobenzyl)pentan-2-one (**4b**)

The compound **4b** was prepared according to the general procedure and was purified by preparative TLC to give a colorless oil in 65% yield (29 mg).

$^1\text{H NMR}$  (400 MHz,  $\text{CDCl}_3$ )  $\delta$  8.13 (d,  $J = 8.4$  Hz, 2H), 7.31 (d,  $J = 8.4$  Hz, 2H), 3.02 (dd,  $J = 12.4, 7.6$  Hz, 1H), 2.83-2.73 (m, 2H), 2.04 (s, 3H), 1.73-1.64 (m, 1H), 1.59-1.53 (m, 1H), 0.92 (t,  $J = 7.6$  Hz, 3H);

$^{13}\text{C NMR}$  (125 MHz,  $\text{CDCl}_3$ )  $\delta$  210.89, 147.80, 146.58, 129.71, 123.67, 55.50, 36.50, 30.09, 24.67, 11.32;

IR (neat): 2929, 1707, 1599, 1514, 1342, 1165, 1109, 853, 800, 731, 695  $\text{cm}^{-1}$ ;

HRMS (ESI-TOF):  $m/z$  calculated for  $\text{C}_{12}\text{H}_{16}\text{NO}_3$   $[\text{M}+\text{H}]^+$ : 222.1125; found: 222.1131.

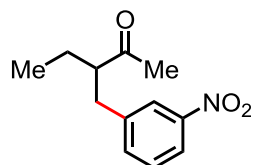

### 3-(3-nitrobenzyl)pentan-2-one (**4c**)

The compound **4c** was prepared according to the general procedure and was purified by preparative TLC to give a colorless oil in 62% yield (27 mg).



$^1\text{H}$  NMR (400 MHz,  $\text{CDCl}_3$ )  $\delta$  8.06-8.02 (m, 2H), 7.49-7.41 (m, 2H), 3.03 (dd,  $J = 12.8, 7.6$  Hz, 1H), 2.84-2.73 (m, 2H), 2.06 (s, 3H), 1.74-1.64 (m, 1H), 1.59-1.53 (m, 1H), 0.92 (t,  $J = 7.6$  Hz, 3H);  
 $^{13}\text{C}$  NMR (125 MHz,  $\text{CDCl}_3$ )  $\delta$  210.94, 148.31, 141.95, 135.26, 129.30, 123.56, 121.42, 55.51, 36.19, 30.03, 24.53, 11.29;  
IR (neat): 2928, 1707, 1524, 1459, 1346, 1162, 1098, 806, 729, 686  $\text{cm}^{-1}$ ;  
HRMS (ESI-TOF):  $m/z$  calculated for  $\text{C}_{12}\text{H}_{16}\text{NO}_3$   $[\text{M}+\text{H}]^+$ : 222.1125; found: 222.1131.

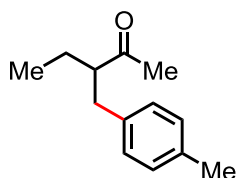

### 3-(4-methylbenzyl)pentan-2-one (4d)

The compound **4d** was prepared according to the general procedure with 3 equiv. of aryl iodide at 130  $^{\circ}\text{C}$  and was purified by preparative TLC to give a colorless oil in 60% yield (23 mg).

$^1\text{H}$  NMR (400 MHz,  $\text{CDCl}_3$ )  $\delta$  7.08 (d,  $J = 8.0$  Hz, 2H), 7.03 (d,  $J = 8.0$  Hz, 2H), 2.84 (dd,  $J = 13.0, 7.6$  Hz, 1H), 2.76-2.70 (m, 1H), 2.64 (dd,  $J = 13.0, 6.4$  Hz, 1H), 2.03 (s, 3H), 2.01 (s, 3H), 1.68-1.61 (m, 1H), 1.55-1.48 (m, 1H), 0.88 (t,  $J = 7.6$  Hz, 3H);

$^{13}\text{C}$  NMR (125 MHz,  $\text{CDCl}_3$ )  $\delta$  212.46, 136.52, 135.66, 129.09, 128.67, 56.25, 37.02, 30.10, 24.45, 20.96, 11.58;

IR (neat): 2923, 1709, 1514, 1458, 1349, 1159, 1021, 800, 751  $\text{cm}^{-1}$ ;

HRMS (ESI-TOF):  $m/z$  calculated for  $\text{C}_{13}\text{H}_{19}\text{O}$   $[\text{M}+\text{H}]^+$ : 191.1430; found: 191.1424.

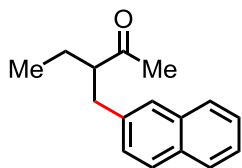

### 3-(naphthalen-2-ylmethyl)pentan-2-one (4e)

The compound **4e** was prepared according to the general procedure and was purified by preparative TLC to give a colorless oil in 53% yield (24 mg).

$^1\text{H}$  NMR (400 MHz,  $\text{CDCl}_3$ )  $\delta$  7.82-7.76 (m, 3H), 7.59 (s, 1H), 7.48-7.41 (m, 2H), 7.30 (d,  $J = 8.0$  Hz, 1H), 3.09-3.02 (m, 1H), 2.90-2.82 (m, 2H), 2.02 (s, 3H), 1.74-1.67 (m, 1H), 1.61-1.52 (m, 1H), 0.91 (t,  $J = 8.0$  Hz, 3H);

$^{13}\text{C}$  NMR (125 MHz,  $\text{CDCl}_3$ )  $\delta$  212.26, 137.24, 133.51, 132.11, 128.08, 127.59, 127.49, 127.29, 127.21, 126.01, 125.38, 56.07, 37.56, 30.24, 24.60, 11.60;

IR (neat): 2931, 1709, 1508, 1459, 1359, 1163, 856, 820, 751  $\text{cm}^{-1}$ ;

HRMS (ESI-TOF):  $m/z$  calculated for  $\text{C}_{16}\text{H}_{19}\text{O}$   $[\text{M}+\text{H}]^+$ : 227.1430; found: 227.1432.

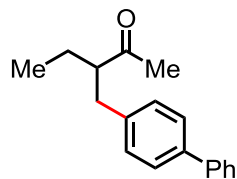

### 3-((1,1'-biphenyl)-4-ylmethyl)pentan-2-one (**4f**)

The compound **4f** was prepared according to the general procedure and was purified by preparative TLC to give a colorless oil in 47% yield (24 mg).

$^1\text{H NMR}$  (400 MHz,  $\text{CDCl}_3$ )  $\delta$  7.58 (d,  $J = 8.0$  Hz, 2H), 7.51 (d,  $J = 8.0$  Hz, 2H), 7.43 (t,  $J = 7.6$  Hz, 2H), 7.33 (t,  $J = 7.2$  Hz, 1H), 7.22 (d,  $J = 8.0$  Hz, 2H), 2.94 (dd,  $J = 13.0, 7.8$  Hz, 1H), 2.84-2.77 (m, 1H), 2.73 (dd,  $J = 13.0, 6.3$  Hz, 1H), 2.05 (s, 3H), 1.76-1.64 (m, 1H), 1.60-1.53 (m, 1H), 0.92 (t,  $J = 7.6$  Hz, 3H);

$^{13}\text{C NMR}$  (125 MHz,  $\text{CDCl}_3$ )  $\delta$  212.23, 140.85, 139.13, 138.81, 129.25, 128.71, 127.13, 127.11, 126.94, 56.10, 36.96, 30.15, 24.55, 11.57;

IR (neat): 2931, 1709, 1486, 1409, 1351, 1160, 841, 763, 698  $\text{cm}^{-1}$ ;

HRMS (ESI-TOF):  $m/z$  calculated for  $\text{C}_{18}\text{H}_{21}\text{O}$   $[\text{M}+\text{H}]^+$ : 253.1587; found: 253.1593.

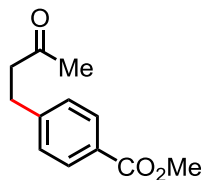

### methyl 4-(3-oxobutyl)benzoate (**4g**)

The compound **4g** was prepared according to the general procedure and was purified by preparative TLC to give a colorless oil in 47% yield (19 mg).

$^1\text{H NMR}$  (400 MHz,  $\text{CDCl}_3$ )  $\delta$  7.94 (d,  $J = 8.1$  Hz, 2H), 7.24 (d,  $J = 8.1$  Hz, 2H), 3.89 (s, 3H), 2.94 (t,  $J = 7.6$  Hz, 2H), 2.77 (t,  $J = 7.6$  Hz, 2H), 2.13 (s, 3H);

$^{13}\text{C NMR}$  (125 MHz,  $\text{CDCl}_3$ )  $\delta$  207.20, 166.95, 146.48, 129.78, 128.32, 128.10, 51.95, 44.51, 30.02, 29.57;

IR (neat): 2952, 1709, 1610, 1434, 1355, 1273, 1161, 1104, 764, 703  $\text{cm}^{-1}$ ;

HRMS (ESI-TOF):  $m/z$  calculated for  $\text{C}_{14}\text{H}_{19}\text{O}_3$   $[\text{M}+\text{H}]^+$ : 207.1016; found: 207.1012.

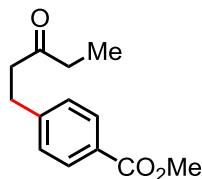

### methyl 4-(3-oxopentyl)benzoate (**4h**)

The compound **4h** was prepared according to the general procedure and was purified by preparative TLC to give a colorless oil in 59% yield (26 mg).

$^1\text{H}$  NMR (400 MHz,  $\text{CDCl}_3$ )  $\delta$  7.94 (d,  $J = 8.0$  Hz, 2H), 7.25 (d,  $J = 8.0$  Hz, 2H), 3.90 (s, 3H), 2.95 (t,  $J = 8.0$  Hz, 2H), 2.75 (t,  $J = 7.6$  Hz, 2H), 2.40 (q,  $J = 8.0$  Hz, 2H), 1.04 (t,  $J = 8.0$  Hz, 3H);

$^{13}\text{C}$  NMR (125 MHz,  $\text{CDCl}_3$ )  $\delta$  210.08, 167.04, 146.69, 129.81, 128.37, 128.10, 51.99, 43.26, 36.14, 29.73, 7.72;

IR (neat): 2950, 1709, 1610, 1434, 1274, 1178, 1103, 762, 703  $\text{cm}^{-1}$ ;

HRMS (ESI-TOF):  $m/z$  calculated for  $\text{C}_{13}\text{H}_{17}\text{O}_3$   $[\text{M}+\text{H}]^+$ : 221.1172; found: 221.1166.

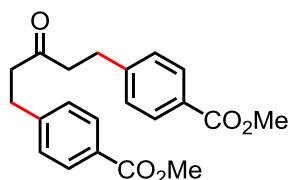

#### dimethyl 4,4'-(3-oxopentane-1,5-diyl)dibenzoate (**4h'**)

The compound **4h'** was isolated in 26% yield (18 mg).

$^1\text{H}$  NMR (400 MHz,  $\text{CDCl}_3$ )  $\delta$  7.93 (d,  $J = 8.0$  Hz, 4H), 7.21 (d,  $J = 8.0$  Hz, 4H), 3.90 (s, 6H), 2.93 (t,  $J = 7.2$  Hz, 4H), 2.72 (t,  $J = 7.2$  Hz, 4H);

$^{13}\text{C}$  NMR (125 MHz,  $\text{CDCl}_3$ )  $\delta$  207.90, 166.96, 146.35, 129.83, 128.35, 128.19, 51.99, 43.89, 29.56;

IR (neat): 2952, 1714, 1608, 1436, 1274, 1177, 1105, 765, 707  $\text{cm}^{-1}$ ;

HRMS (ESI-TOF):  $m/z$  calculated for  $\text{C}_{21}\text{H}_{23}\text{O}_5$   $[\text{M}+\text{H}]^+$ : 355.1540; found: 355.1546.

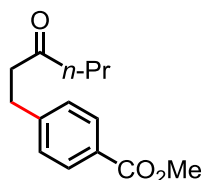

#### methyl 4-(3-oxohexyl)benzoate (**4i**)

The compound **4i** was prepared according to the general procedure and was purified by preparative TLC to give a colorless oil in 60% yield (28 mg).

$^1\text{H}$  NMR (400 MHz,  $\text{CDCl}_3$ )  $\delta$  7.94 (d,  $J = 8.4$  Hz, 2H), 7.25 (d,  $J = 8.4$  Hz, 2H), 3.90 (s, 3H), 2.94 (t,  $J = 7.6$  Hz, 2H), 2.74 (t,  $J = 7.6$  Hz, 2H), 2.36 (t,  $J = 7.2$  Hz, 2H), 1.61-1.56 (m, 2H), 0.89 (t,  $J = 7.6$  Hz, 3H);

$^{13}\text{C}$  NMR (125 MHz,  $\text{CDCl}_3$ )  $\delta$  209.61, 167.02, 146.71, 129.80, 128.38, 128.08, 51.98, 44.93, 43.65, 29.64, 17.21, 13.69;

IR (neat): 2955, 1714, 1610, 1435, 1278, 1179, 1108, 765, 707  $\text{cm}^{-1}$ ;

HRMS (ESI-TOF):  $m/z$  calculated for  $\text{C}_{14}\text{H}_{19}\text{O}_3$   $[\text{M}+\text{H}]^+$ : 235.1329; found: 235.1325.

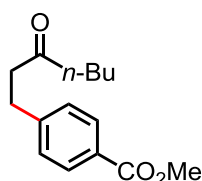

**methyl 4-(3-oxoheptyl)benzoate (4j)**

The compound **4j** was prepared according to the general procedure and was purified by preparative TLC to give a colorless oil in 48% yield (24 mg).

$^1\text{H}$  NMR (400 MHz,  $\text{CDCl}_3$ )  $\delta$  7.94 (d,  $J = 8.4$  Hz, 2H), 7.25 (d,  $J = 8.4$  Hz, 2H), 3.90 (s, 3H), 2.94 (t,  $J = 7.6$  Hz, 2H), 2.74 (t,  $J = 7.6$  Hz, 2H), 2.38 (t,  $J = 7.2$  Hz, 2H), 1.57-1.50 (m, 2H), 1.33-1.23 (m, 2H), 0.88 (t,  $J = 7.2$  Hz, 3H);

$^{13}\text{C}$  NMR (125 MHz,  $\text{CDCl}_3$ )  $\delta$  209.71, 167.01, 146.71, 129.80, 128.37, 128.08, 51.98, 43.62, 42.75, 29.67, 25.85, 22.29, 13.79;

IR (neat): 2954, 1713, 1610, 1434, 1274, 1179, 1105, 763, 704  $\text{cm}^{-1}$ ;

HRMS (ESI-TOF):  $m/z$  calculated for  $\text{C}_{15}\text{H}_{21}\text{O}_3$   $[\text{M}+\text{H}]^+$ : 249.1485; found: 249.1480.

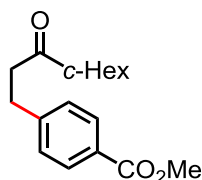**methyl 4-(3-cyclohexyl-3-oxopropyl)benzoate (4k)**

The compound **4k** was prepared according to the general procedure and was purified by preparative TLC to give a colorless oil in 40% yield (22 mg).

$^1\text{H}$  NMR (400 MHz,  $\text{CDCl}_3$ )  $\delta$  7.93 (d,  $J = 8.0$  Hz, 2H), 7.23 (d,  $J = 8.0$  Hz, 2H), 3.88 (s, 3H), 2.92 (t,  $J = 8.0$  Hz, 2H), 2.76 (t,  $J = 8.0$  Hz, 2H), 2.32-2.26 (m, 1H), 1.79-1.74 (m, 4H), 1.65-1.62 (m, 1H), 1.33-1.14 (m, 5H);

$^{13}\text{C}$  NMR (125 MHz,  $\text{CDCl}_3$ )  $\delta$  212.51, 166.99, 146.93, 129.72, 128.35, 127.97, 51.92, 50.89, 41.56, 29.58, 28.32, 25.74, 25.55;

IR (neat): 2930, 1709, 1610, 1435, 1278, 1109, 1019, 732, 702  $\text{cm}^{-1}$ ;

HRMS (ESI-TOF):  $m/z$  calculated for  $\text{C}_{17}\text{H}_{23}\text{O}_3$   $[\text{M}+\text{H}]^+$ : 275.1642; found: 275.1638.

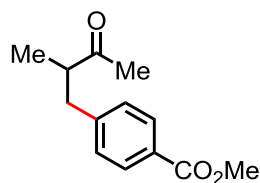**methyl 4-(2-methyl-3-oxobutyl)benzoate (4l)**

The compound **4l** was prepared according to the general procedure and was purified by preparative TLC to give a colorless oil in 57% yield (25 mg).

$^1\text{H}$  NMR (400 MHz,  $\text{CDCl}_3$ )  $\delta$  7.91 (d,  $J = 8.4$  Hz, 2H), 7.18 (d,  $J = 8.4$  Hz, 2H), 3.86 (s, 3H), 3.01 (dd,  $J = 13.2, 7.4$  Hz, 1H), 2.86-2.77 (m, 1H), 2.57 (dd,  $J = 13.2, 7.4$  Hz, 1H), 2.06 (s, 3H), 1.06 (d,  $J = 7.2, 3\text{H}$ );

$^{13}\text{C}$  NMR (125 MHz,  $\text{CDCl}_3$ )  $\delta$  211.35, 166.86, 145.16, 129.63, 128.88, 128.16, 51.88, 48.34, 38.57, 28.72, 16.22;

IR (neat): 2952, 1709, 1610, 1434, 1273, 1104, 1019, 766, 702  $\text{cm}^{-1}$ ;

HRMS (ESI-TOF):  $m/z$  calculated for  $C_{13}H_{17}O_3$   $[M+H]^+$ : 221.1172; found: 221.1168.

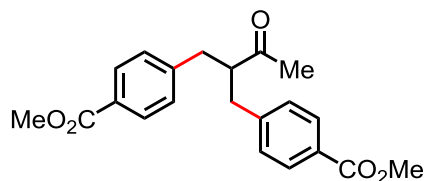

**dimethyl 4,4'-(2-acetylpropane-1,3-diyl)dibenzoate (4l')**

The compound **4l'** was isolated in 21% yield (15 mg).

$^1H$  NMR (400 MHz,  $CDCl_3$ )  $\delta$  7.95 (d,  $J = 8.4$  Hz, 4H), 7.20 (d,  $J = 8.4$  Hz, 4H), 3.90 (s, 6H), 3.21-3.13 (m, 1H), 3.01-2.96 (m, 2H), 2.77-2.72 (m, 2H), 1.78 (s, 3H);

$^{13}C$  NMR (125 MHz,  $CDCl_3$ )  $\delta$  210.89, 166.88, 144.42, 129.92, 128.90, 128.57, 55.75, 52.06, 37.99, 31.58;

IR (neat): 2950, 1712, 1609, 1434, 1274, 1103, 1020, 765, 706  $cm^{-1}$ ;

HRMS (ESI-TOF):  $m/z$  calculated for  $C_{21}H_{23}O_5$   $[M+H]^+$ : 355.1540; found: 355.1537.

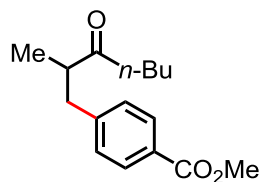

**methyl 4-(2-methyl-3-oxoheptyl)benzoate (4m)**

The compound **4m** was prepared according to the general procedure and was purified by preparative TLC to give a colorless oil in 38% yield (20 mg).

$^1H$  NMR (400 MHz,  $CDCl_3$ )  $\delta$  7.93 (d,  $J = 8.0$  Hz, 2H), 7.20 (d,  $J = 8.0$  Hz, 2H), 3.89 (s, 3H), 3.02 (dd,  $J = 13.6, 7.6$  Hz, 1H), 2.88-2.79 (m, 1H), 2.59 (dd,  $J = 13.6, 7.2$  Hz, 1H), 2.44-2.36 (m, 1H), 2.28-2.20 (m, 1H), 1.49-1.42 (m, 2H), 1.26-1.16 (m, 2H), 1.07 (d,  $J = 6.8$  Hz, 3H), 0.84 (t,  $J = 7.6$  Hz, 3H);

$^{13}C$  NMR (125 MHz,  $CDCl_3$ )  $\delta$  213.70, 166.98, 145.42, 129.67, 128.97, 128.17, 51.96, 47.72, 41.64, 38.88, 25.53, 22.22, 16.64, 13.77;

IR (neat): 2959, 1714, 1611, 1435, 1277, 1108, 1020, 733, 702  $cm^{-1}$ ;

HRMS (ESI-TOF):  $m/z$  calculated for  $C_{16}H_{23}O_3$   $[M+H]^+$ : 263.1642; found: 263.1638.

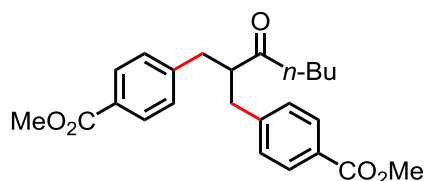

**dimethyl 4,4'-(2-pentanoylpropane-1,3-diyl)dibenzoate (4m')**

The compound **4m'** was isolated in 15% yield (12 mg).

$^1\text{H}$  NMR (400 MHz,  $\text{CDCl}_3$ )  $\delta$  7.94 (d,  $J = 8.0$  Hz, 4H), 7.18 (d,  $J = 8.0$  Hz, 4H), 3.90 (s, 6H), 3.16-3.10 (m, 1H), 2.97 (dd,  $J = 12.0, 8.0$  Hz, 2H), 2.72 (dd,  $J = 12.0, 8.0$  Hz, 2H), 1.91 (t,  $J = 8.0$  Hz, 2H), 1.25-1.18 (m, 2H), 1.05-0.95 (m, 2H), 0.69 (t,  $J = 8.0$  Hz, 3H);

$^{13}\text{C}$  NMR (125 MHz,  $\text{CDCl}_3$ )  $\delta$  212.98, 166.90, 144.59, 129.85, 128.96, 128.49, 55.26, 52.05, 44.47, 38.28, 24.85, 21.92, 13.63;

IR (neat): 2952, 1719, 1610, 1435, 1278, 1107, 1020, 764, 706  $\text{cm}^{-1}$ ;

HRMS (ESI-TOF):  $m/z$  calculated for  $\text{C}_{24}\text{H}_{29}\text{O}_5$   $[\text{M}+\text{H}]^+$ : 397.2010; found: 397.2005.

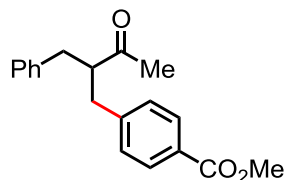

#### methyl 4-(2-benzyl-3-oxobutyl)benzoate (**4n**)

The compound **4n** was prepared according to the general procedure and was purified by preparative TLC to give a colorless oil in 55% yield (33 mg).

$^1\text{H}$  NMR (400 MHz,  $\text{CDCl}_3$ )  $\delta$  7.90 (d,  $J = 8.0$  Hz, 2H), 7.23 (d,  $J = 8.0$  Hz, 2H), 7.18-7.15 (m, 3H), 7.09 (d,  $J = 8.0$  Hz, 2H), 3.86 (s, 3H), 3.16-3.09 (m, 1H), 2.97-2.87 (m, 2H), 2.75-2.65 (m, 2H), 1.74 (s, 3H);

$^{13}\text{C}$  NMR (125 MHz,  $\text{CDCl}_3$ )  $\delta$  211.45, 166.92, 144.87, 138.89, 129.83, 128.90, 128.82, 128.60, 128.38, 126.53, 56.09, 52.03, 38.28, 37.84, 31.57;

IR (neat): 2951, 1709, 1609, 1435, 1276, 1103, 1020, 908, 727, 699  $\text{cm}^{-1}$ ;

HRMS (ESI-TOF):  $m/z$  calculated for  $\text{C}_{19}\text{H}_{21}\text{O}_3$   $[\text{M}+\text{H}]^+$ : 297.1485; found: 297.1484.

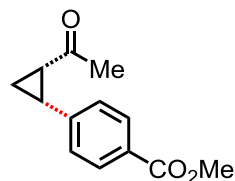

#### methyl 4-(2-acetylcyclopropyl)benzoate (**4o**)

The compound **4o** was prepared according to the general procedure and was purified by preparative TLC to give a colorless oil in 39% yield (17 mg). Analysis of crude reaction mixture by  $^1\text{H}$  NMR showed a 20:1 diastereomer ratio. The relative stereochemistry was determined by NOESY analysis.

$^1\text{H}$  NMR (400 MHz,  $\text{CDCl}_3$ )  $\delta$  7.93 (d,  $J = 8.0$  Hz, 2H), 7.27 (d,  $J = 8.0$  Hz, 2H), 3.88 (s, 3H), 2.73-2.67 (m, 1H), 2.52-2.46 (m, 1H), 2.04 (s, 3H), 1.90-1.85 (m, 1H), 1.39-1.33 (m, 1H);

$^{13}\text{C}$  NMR (125 MHz,  $\text{CDCl}_3$ )  $\delta$  203.74, 166.96, 141.49, 129.27, 129.07, 128.53, 51.98, 31.39, 30.40, 28.16, 12.00;

IR (neat): 2952, 1718, 1611, 1435, 1279, 1111, 1018, 778, 737, 705  $\text{cm}^{-1}$ ;

HRMS (ESI-TOF):  $m/z$  calculated for  $\text{C}_{13}\text{H}_{15}\text{O}_3$   $[\text{M}+\text{H}]^+$ : 219.1016; found: 219.1013.

The following NOEs were observed:

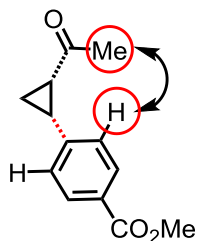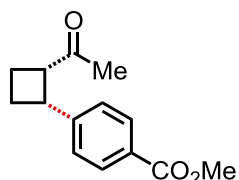

#### methyl 4-(2-acetylcyclobutyl)benzoate (**4p**)

The compound **4p** was prepared according to the general procedure and was purified by preparative TLC to give a colorless oil in 52% yield (24 mg). Analysis of crude reaction mixture by  $^1\text{H}$  NMR showed a > 20:1 diastereomer ratio. The relative stereochemistry was assigned by analogy to compound **4o** and **4q**.

$^1\text{H}$  NMR (400 MHz,  $\text{CDCl}_3$ )  $\delta$  7.98 (d,  $J = 8.0$  Hz, 2H), 7.30 (d,  $J = 8.0$  Hz, 2H), 3.90 (s, 3H), 3.80-3.72 (m, 1H), 3.34-3.27 (m, 1H), 2.27-2.12 (m, 4H), 2.05 (s, 3H);

$^{13}\text{C}$  NMR (125 MHz,  $\text{CDCl}_3$ )  $\delta$  208.34, 166.97, 148.99, 129.82, 128.33, 126.62, 53.53, 52.02, 42.06, 27.74, 24.54, 21.42;

IR (neat): 2951, 1718, 1610, 1435, 1278, 1110, 738, 685  $\text{cm}^{-1}$ ;

HRMS (ESI-TOF):  $m/z$  calculated for  $\text{C}_{14}\text{H}_{17}\text{O}_3$   $[\text{M}+\text{H}]^+$ : 233.1172; found: 233.1176.

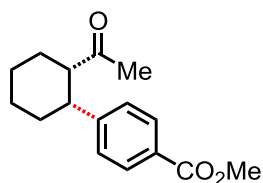

#### methyl 4-(2-acetylcyclohexyl)benzoate (**4q**)

The compound **4q** was prepared according to the general procedure and was purified by preparative TLC to give a colorless oil in 54% yield (29 mg). Analysis of crude reaction mixture by  $^1\text{H}$  NMR showed a > 20:1 diastereomer ratio. The relative stereochemistry was determined by NOESY analysis.

$^1\text{H}$  NMR (400 MHz,  $\text{CDCl}_3$ )  $\delta$  7.93 (d,  $J = 8.0$  Hz, 2H), 7.24 (d,  $J = 8.0$  Hz, 2H), 3.88 (s, 3H), 2.86-2.75 (m, 2H), 1.97-1.86 (m, 4H), 1.82 (s, 3H), 1.53-1.36 (m, 4H);

$^{13}\text{C}$  NMR (125 MHz,  $\text{CDCl}_3$ )  $\delta$  211.44, 166.97, 150.35, 129.87, 128.34, 127.36, 56.95, 51.97, 46.20, 34.08, 29.88, 29.51, 26.05, 25.50;

IR (neat): 2927, 1709, 1609, 1434, 1273, 1108, 768, 706  $\text{cm}^{-1}$ ;

HRMS (ESI-TOF):  $m/z$  calculated for  $\text{C}_{16}\text{H}_{21}\text{O}_3$   $[\text{M}+\text{H}]^+$ : 261.1485; found: 261.1482.

The following NOEs were observed:

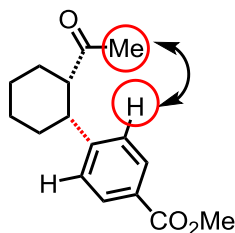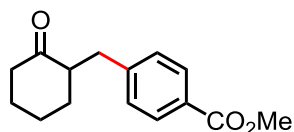

**methyl 4-((2-oxocyclohexyl)methyl)benzoate (4r)**

The compound **4r** was prepared according to the general procedure and was purified by preparative TLC to give a colorless oil in 60% yield (30 mg).

$^1\text{H}$  NMR (400 MHz,  $\text{CDCl}_3$ )  $\delta$  7.93 (d,  $J = 8.0$  Hz, 2H), 7.22 (d,  $J = 8.0$  Hz, 2H), 3.89 (s, 3H), 3.26 (dd,  $J = 14.0, 5.2$  Hz, 1H), 2.61-2.53 (m, 1H), 2.48-2.41 (m, 2H), 2.36-2.28 (m, 1H), 2.09-1.96 (m, 2H), 1.88-1.81 (m, 1H), 1.71-1.54 (m, 2H), 1.41-1.31 (m, 1H);

$^{13}\text{C}$  NMR (125 MHz,  $\text{CDCl}_3$ )  $\delta$  211.92, 167.06, 146.04, 129.61, 129.14, 127.99, 52.16, 51.96, 42.14, 35.54, 33.53, 27.96, 25.08;

IR (neat): 2939, 1708, 1611, 1435, 1265, 1109, 731, 701  $\text{cm}^{-1}$ ;

HRMS (ESI-TOF):  $m/z$  calculated for  $\text{C}_{15}\text{H}_{19}\text{O}_3$   $[\text{M}+\text{H}]^+$ : 247.1329; found: 247.1327.

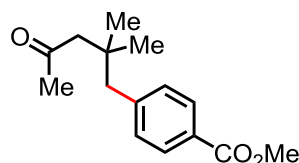

**methyl 4-(2,2-dimethyl-4-oxopentyl)benzoate (4s)**

The compound **4s** was prepared according to the general procedure and was purified by preparative TLC to give a colorless oil in 49% yield (24 mg).

$^1\text{H}$  NMR (400 MHz,  $\text{CDCl}_3$ )  $\delta$  7.93 (d,  $J = 8.0$  Hz, 2H), 7.19 (d,  $J = 8.0$  Hz, 2H), 3.90 (s, 3H), 2.75 (s, 2H), 2.27 (s, 2H), 2.11 (s, 3H), 1.01 (s, 6H);

$^{13}\text{C}$  NMR (125 MHz,  $\text{CDCl}_3$ )  $\delta$  208.62, 167.16, 144.41, 130.56, 129.08, 128.05, 52.92, 51.97, 47.26, 34.50, 32.38, 27.39;

IR (neat): 2954, 1714, 1610, 1434, 1275, 1110, 744, 707  $\text{cm}^{-1}$ ;

HRMS (ESI-TOF):  $m/z$  calculated for  $\text{C}_{15}\text{H}_{21}\text{O}_3$   $[\text{M}+\text{H}]^+$ : 249.1485; found: 249.1485.



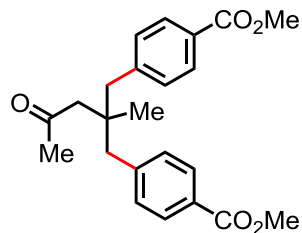

**dimethyl 4,4'-(2-methyl-2-(2-oxopropyl)propane-1,3-diyl)dibenzoate (4s')**

The compound **4s'** was isolated in 12% yield (9.2 mg).

$^1\text{H NMR}$  (400 MHz,  $\text{CDCl}_3$ )  $\delta$  7.94 (d,  $J = 8.0$  Hz, 4H), 7.17 (d,  $J = 8.0$  Hz, 4H), 3.90 (s, 6H), 3.08 (d,  $J = 12.0$  Hz, 2H), 2.76 (d,  $J = 12.0$  Hz, 2H), 2.10 (s, 2H), 2.06 (s, 3H), 0.90 (s, 3H);

$^{13}\text{C NMR}$  (125 MHz,  $\text{CDCl}_3$ )  $\delta$  208.59, 167.08, 143.95, 130.65, 129.22, 128.27, 52.03, 48.90, 45.41, 38.06, 31.85, 24.93;

IR (neat): 2953, 1713, 1434, 1276, 1108, 782, 762, 712  $\text{cm}^{-1}$ ;

HRMS (ESI-TOF):  $m/z$  calculated for  $\text{C}_{23}\text{H}_{27}\text{O}_5$   $[\text{M}+\text{H}]^+$ : 383.1853; found: 383.1847.

#### IV. Pd(II)-Catalyzed Enantioselective Benzylic C(sp<sup>3</sup>)-H Arylation of Aldehydes (Fig. 4)

##### General Procedure

In air, a reaction tube (10 mL) with magnetic stir bar was charged with aldehyde substrate (0.20 mmol), aryl iodide (0.60 mmol), silver trifluoroacetate (88.4 mg, 0.40 mmol), palladium acetate (4.5 mg, 0.020 mmol) and *L-tert*-leucine (5.2 mg, 0.040 mmol), followed by the mixture of HFIP (0.9 mL), acetic acid (0.1 mL) and H<sub>2</sub>O (10.8 μL). The reaction tube was sealed and allowed to stir at ambient temperature for 10 minutes, then heated to 100 °C for 24 hours. Upon completion, the reaction mixture was cooled to room temperature, diluted with EtOAc, filtered through a silica gel plug, and concentrated *in vacuo*. The crude reaction mixture was purified on silica gel using hexanes/ EtOAc as the eluent to afford the desired product.

**Table S3. Optimization of Pd(II)-Catalyzed Enantioselective Benzylic C(sp<sup>3</sup>)-H Arylation of Aldehydes<sup>\*,†</sup>**

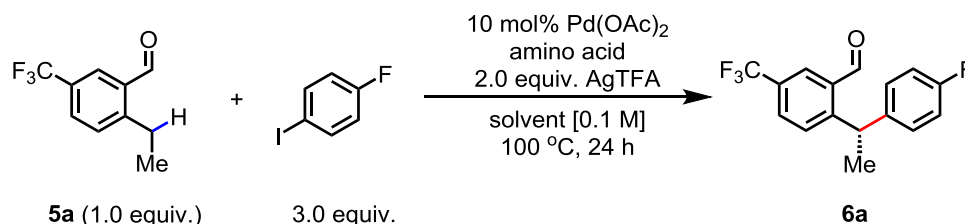

| entry | amino acid                         | solvent                            | additive                    | conversion (%) | NMR yield (%)              | er          |
|-------|------------------------------------|------------------------------------|-----------------------------|----------------|----------------------------|-------------|
| 1     | L-valine (40%)                     | AcOH:H <sub>2</sub> O (9:1)        | -                           | 42             | 10                         | -           |
| 2     | L-valine (40%)                     | AcOH                               | -                           | 70             | 21                         | -           |
| 3     | L-valine (40%)                     | HFIP                               | -                           | 10             | <2                         | -           |
| 4     | L-valine (40%)                     | HFIP:AcOH (9:1)                    | -                           | 96             | 88                         | 85:15       |
| 5     | <i>L-tert</i> -leucine (40%)       | HFIP:AcOH (9:1)                    | -                           | 60             | 30                         | 98:2        |
| 6     | <i>L-tert</i> -leucine (20%)       | HFIP:AcOH (9:1)                    | -                           | 96             | 87                         | 98:2        |
| 7     | <b><i>L-tert</i>-leucine (20%)</b> | <b>HFIP:AcOH (9:1)<sup>‡</sup></b> | -                           | <b>98</b>      | <b>90</b>                  | <b>98:2</b> |
| 8     | <b><i>L-tert</i>-leucine (20%)</b> | <b>HFIP:AcOH (9:1)<sup>‡</sup></b> | <b>H<sub>2</sub>O (3.0)</b> | <b>96</b>      | <b>88 (80)<sup>§</sup></b> | <b>98:2</b> |

<sup>\*</sup>Conditions: 0.2 mmol of **5a**, 3.0 equiv of 4-fluoroiodobenzene, 10 mol% of Pd(OAc)<sub>2</sub>, 40 mol% or 20 mol% of amino acid, 3.0 equiv of AgTFA, 1.0 or 2.0 mL solvent, 100 °C, 24 h. <sup>†</sup>The yield was determined by <sup>1</sup>H NMR analysis of the crude product using CH<sub>2</sub>Br<sub>2</sub> as the internal standard. <sup>‡</sup>[0.2 M] instead of [0.1 M]. <sup>§</sup>isolated yield.

## Full Characterization of Reaction Products and Proof of Stereochemistry

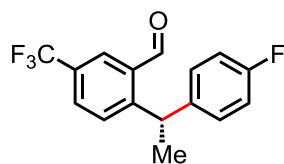

### (S)-2-(1-(4-fluorophenyl)ethyl)-5-(trifluoromethyl)benzaldehyde (**6a**)

The compound **6a** was prepared according to the general procedure and was purified by preparative TLC to give a colorless oil in 80% yield (47 mg).

$^1\text{H}$  NMR ( $\text{CDCl}_3$ , 600 MHz):  $\delta$  10.31 (s, 1H), 8.08 (d,  $J = 2.1$  Hz, 1H), 7.77 (dd,  $J = 8.2, 2.1$  Hz, 1H), 7.47 (d,  $J = 8.2$  Hz, 1H), 7.17-7.13 (m, 2H), 7.01-6.97 (m, 2H), 5.27 (q,  $J = 7.1$  Hz, 1H), 1.67 (d,  $J = 7.1$  Hz, 3H);

$^{13}\text{C}$  NMR ( $\text{CDCl}_3$ , 150 MHz):  $\delta$  190.83, 161.49 (d,  $J_{CF} = 245.4$  Hz), 152.03, 140.21 (d,  $J_{CF} = 3.3$  Hz), 133.45, 130.18 (q,  $J_{CF} = 3.6$  Hz), 129.43 (q,  $J_{CF} = 33.4$  Hz), 129.19 (d,  $J_{CF} = 8.5$  Hz), 129.15, 128.99 (q,  $J_{CF} = 3.9$  Hz), 123.52 (q,  $J_{CF} = 272.1$  Hz), 115.50 (d,  $J_{CF} = 21.0$  Hz), 38.27, 22.14;

$^{19}\text{F}$  NMR ( $\text{CDCl}_3$ , 376 MHz):  $\delta$  -63.14, -116.44;

HPLC Chiralpak® AS-H column (1% isopropanol in hexanes, 0.5 mL/min)  $t_r = 12.77$  min (minor), 13.51 min (major): 98:2 er.

IR (neat): 1705, 1618, 1508, 1330, 1225, 1162, 1124, 1085, 901, 836, 550  $\text{cm}^{-1}$ ;

HRMS (ESI-TOF):  $m/z$  calculated for  $\text{C}_{16}\text{H}_{13}\text{F}_4\text{O}^+$   $[\text{M}+\text{H}]^+$  297.0897, found 297.0899.

The absolute stereochemistry was assigned by analogy to compound **6c**.

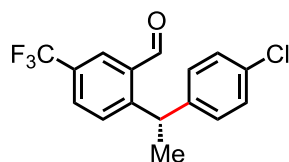

### (S)-2-(1-(4-chlorophenyl)ethyl)-5-(trifluoromethyl)benzaldehyde (**6b**)

The compound **6b** was prepared according to the general procedure and was purified by preparative TLC to give a colorless oil in 72% yield (45 mg).

$^1\text{H}$  NMR ( $\text{CDCl}_3$ , 600 MHz):  $\delta$  10.29 (s, 1H), 8.08 (d,  $J = 1.6$  Hz, 1H), 7.77 (dd,  $J = 8.2, 1.6$  Hz, 1H), 7.46 (d,  $J = 8.2$  Hz, 1H), 7.29-7.23 (m, 2H), 7.15-7.10 (m, 2H), 5.27 (q,  $J = 7.2$  Hz, 1H), 1.67 (d,  $J = 7.2$  Hz, 3H);

$^{13}\text{C}$  NMR ( $\text{CDCl}_3$ , 150 MHz):  $\delta$  190.86, 151.67, 142.99, 133.47, 132.49, 130.21 (q,  $J_{CF} = 3.4$  Hz), 129.53 (q,  $J_{CF} = 33.2$  Hz), 129.25 (q,  $J_{CF} = 3.0$  Hz), 129.19, 129.09, 128.82, 123.50 (q,  $J_{CF} = 272.1$  Hz), 38.42, 21.94;

$^{19}\text{F}$  NMR ( $\text{CDCl}_3$ , 376 MHz):  $\delta$  -63.15;

HPLC Chiralpak® AS-H column (1% isopropanol in hexanes, 0.5 mL/min)  $t_r = 12.81$  min (minor), 13.81 min (major): 97:3 er.

IR (neat): 1698, 1618, 1492, 1330, 1165, 1127, 1088, 1014, 848, 831  $\text{cm}^{-1}$ ;

HRMS (ESI-TOF):  $m/z$  calculated for  $C_{16}H_{13}ClF_3O^+$   $[M+H]^+$  313.0602, found 313.0597.

The absolute stereochemistry was assigned by analogy to compound **6c**.

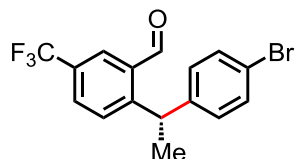

**(S)-2-(1-(4-bromophenyl)ethyl)-5-(trifluoromethyl)benzaldehyde (6c)**

The compound **6c** was prepared according to the general procedure and was purified by preparative TLC to give a colorless oil in 77% yield (55 mg).

$^1H$  NMR ( $CDCl_3$ , 400 MHz):  $\delta$  10.29 (s, 1H), 8.08 (s, 1H), 7.77 (d,  $J = 7.3$  Hz, 1H), 7.47 (d,  $J = 8.2$  Hz, 1H), 7.42 (d,  $J = 8.3$  Hz, 2H), 7.07 (d,  $J = 8.3$  Hz, 2H), 5.26 (q,  $J = 7.2$  Hz, 1H), 1.66 (d,  $J = 7.2$  Hz, 3H);

$^{13}C$  NMR ( $CDCl_3$ , 150 MHz):  $\delta$  190.85, 151.55, 143.52, 133.46, 131.75, 130.20 (q,  $J_{CF} = 3.1$  Hz), 129.52 (q,  $J_{CF} = 33.4$  Hz), 129.47, 129.27 (q,  $J_{CF} = 3.7$  Hz), 129.19, 123.48 (q,  $J_{CF} = 272.2$  Hz), 120.53, 38.47, 21.86;

$^{19}F$  NMR ( $CDCl_3$ , 376 MHz):  $\delta$  -63.14;

HPLC Chiralpak® AS-H column (1% isopropanol in hexanes, 0.5 mL/min)  $t_r =$  12.65 min (minor), 13.73 min (major): 98:2 er.

IR (neat): 1696, 1618, 1488, 1328, 1164, 1123, 1076, 1009, 901, 825, 768, 731, 692, 640, 539  $cm^{-1}$ ;

HRMS (ESI-TOF):  $m/z$  calculated for  $C_{16}H_{13}BrF_3O^+$   $[M+H]^+$  357.0096, found 357.0090.

The absolute stereochemistry was assigned by X-ray crystallography:

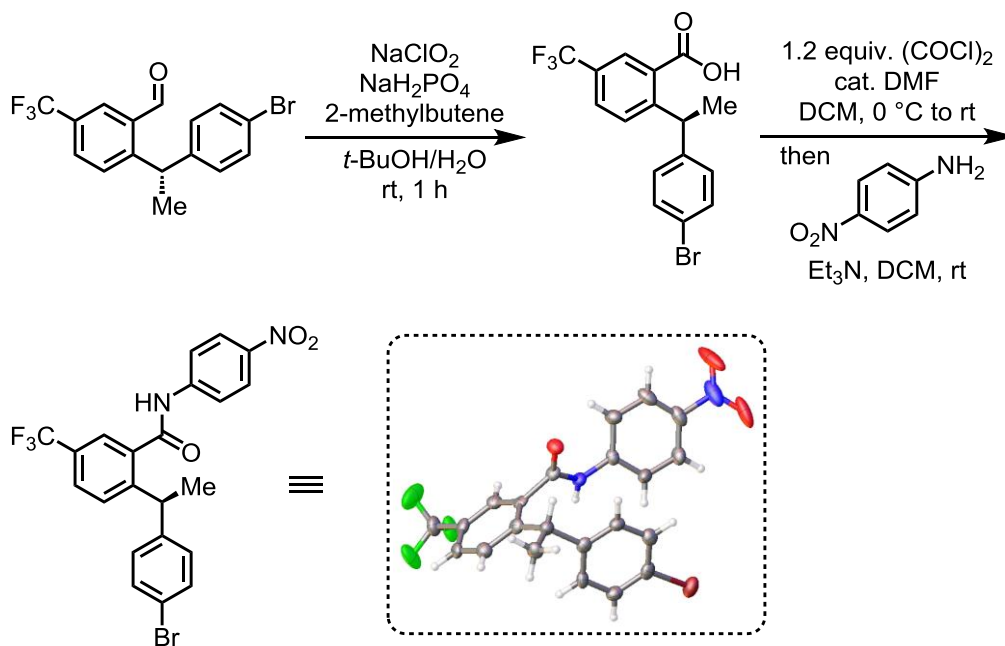

Metric parameters for the structure are available free of charge from the Cambridge Crystallographic Data Centre under reference number CCDC 1434263.

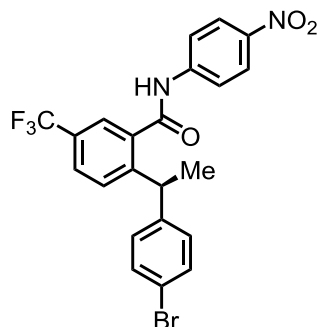

**(S)-2-(1-(4-bromophenyl)ethyl)-N-(4-nitrophenyl)-5-(trifluoromethyl)benzamide (S2)**

$^1\text{H}$  NMR ( $\text{CDCl}_3$ , 600 MHz):  $\delta$  8.24-8.22 (m, 2H), 7.75-7.74 (m, 1H), 7.69 (s, 1H), 7.60-7.58 (m, 3H), 7.38 (s, 1H), 7.32-7.30 (m, 2H), 7.02-7.00 (m, 2H), 4.69 (q,  $J = 7.2$  Hz, 1H), 1.66 (d,  $J = 7.2$  Hz, 3H);

$^{13}\text{C}$  NMR ( $\text{CDCl}_3$ , 150 MHz):  $\delta$  166.82, 147.72, 144.03, 143.79, 142.84, 136.48, 131.75, 129.48, 129.13 (q,  $J_{\text{CF}} = 33.2$  Hz), 128.66, 127.61 (q,  $J_{\text{CF}} = 3.9$  Hz), 125.07, 123.75 (q,  $J_{\text{CF}} = 3.6$  Hz), 123.48 (q,  $J_{\text{CF}} = 272.5$  Hz), 120.59, 119.32, 40.28, 21.66;

$^{19}\text{F}$  NMR ( $\text{CDCl}_3$ , 376 MHz):  $\delta$  -62.88.

IR (neat): 2017, 1667, 1615, 1597, 1549, 1509, 1405, 1337, 1304, 1256, 1173, 1129, 1088, 853  $\text{cm}^{-1}$ ;

HRMS (ESI-TOF):  $m/z$  calculated for  $\text{C}_{22}\text{H}_{17}\text{BrF}_3\text{N}_2\text{O}_3^+$   $[\text{M}+\text{H}]^+$  493.0369, found 383.493.0372.

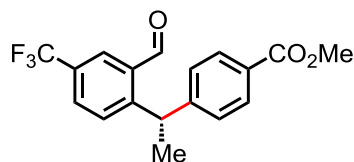

**methyl (S)-4-(1-(2-formyl-4-(trifluoromethyl)phenyl)ethyl)benzoate (6d)**

The compound **6d** was prepared according to the general procedure and was purified by preparative TLC to give a colorless oil in 73% yield (49 mg).

$^1\text{H}$  NMR ( $\text{CDCl}_3$ , 600 MHz):  $\delta$  10.29 (s, 1H), 8.09 (d,  $J = 2.0$  Hz, 1H), 7.98-7.96 (m, 2H), 7.78 (dd,  $J = 8.2, 2.1$  Hz, 1H), 7.47 (d,  $J = 8.2$  Hz, 1H), 7.26 (d,  $J = 8.3$  Hz, 2H), 5.36 (q,  $J = 7.1$  Hz, 1H), 3.90 (s, 3H), 1.71 (d,  $J = 7.2$  Hz, 3H);

$^{13}\text{C}$  NMR ( $\text{CDCl}_3$ , 150 MHz):  $\delta$  190.84, 166.75, 151.28, 149.69, 133.50, 130.22 (q,  $J_{\text{CF}} = 3.2$  Hz), 129.98, 129.59 (q,  $J_{\text{CF}} = 33.6$  Hz), 129.38 (q,  $J_{\text{CF}} = 3.6$  Hz), 129.31, 128.59, 127.79, 123.47 (q,  $J_{\text{CF}} = 272.3$  Hz), 52.09, 39.03, 21.76;

$^{19}\text{F}$  NMR ( $\text{CDCl}_3$ , 376 MHz):  $\delta$  -63.15;

HPLC Chiralpak® AS-H column (10% isopropanol in hexanes, 0.5 mL/min)  $t_r = 15.22$  min (major), 19.73 min (minor): 98:2 er.

IR (neat): 1713.1, 1609.8, 1436.2, 1331.3, 1279.5, 1166.3, 1126.9, 1018.9, 850.5, 730.9  $\text{cm}^{-1}$ ;

HRMS (ESI-TOF):  $m/z$  calculated for  $\text{C}_{18}\text{H}_{16}\text{F}_3\text{O}_3^+$   $[\text{M}+\text{H}]^+$  337.1046, found 337.1042.

The absolute stereochemistry was assigned by analogy to compound **6c**.

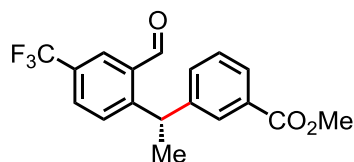

**methyl (S)-3-(1-(2-formyl-4-(trifluoromethyl)phenyl)ethyl)benzoate (6e)**

The compound **6e** was prepared according to the general procedure and was purified by preparative TLC to give a colorless oil in 88% yield (59 mg).

<sup>1</sup>H NMR (CDCl<sub>3</sub>, 600 MHz): δ 10.32 (s, 1H), 8.09 (d, *J* = 2.1 Hz, 1H), 7.91-7.89 (m, 2H), 7.77 (dd, *J* = 8.2, 2.1 Hz, 1H), 7.47 (d, *J* = 8.2 Hz, 1H), 7.38-7.37 (m, 2H), 5.36 (q, *J* = 7.1 Hz, 1H), 3.90 (s, 2H), 1.72 (d, *J* = 7.1 Hz, 3H);

<sup>13</sup>C NMR (CDCl<sub>3</sub>, 150 MHz): δ 190.85, 166.89, 151.59, 144.83, 133.44, 132.49, 130.59, 130.24 (q, *J*<sub>CF</sub> = 3.5 Hz), 129.49 (q, *J*<sub>CF</sub> = 33.1 Hz), 129.32, 129.22 (q, *J*<sub>CF</sub> = 3.4 Hz), 128.76, 128.64, 127.93, 123.49 (q, *J*<sub>CF</sub> = 272.1 Hz), 52.17, 38.81, 21.93;

<sup>19</sup>F NMR (CDCl<sub>3</sub>, 376 MHz): δ -63.14;

HPLC Chiralpak® AS-H column (5% isopropanol in hexanes, 0.5 mL/min) *t*<sub>r</sub> = 13.96 min (minor), 16.10 min (major): 98:2 er.

IR (neat): 1715, 1618, 1435, 1329, 1283, 1164, 1122, 1084, 970, 902, 845, 749, 731, 695 cm<sup>-1</sup>;

HRMS (ESI-TOF): *m/z* calculated for C<sub>18</sub>H<sub>16</sub>F<sub>3</sub>O<sub>3</sub><sup>+</sup> [M+H]<sup>+</sup> 337.1046, found 337.1053.

The absolute stereochemistry was assigned by analogy to compound **6c**.

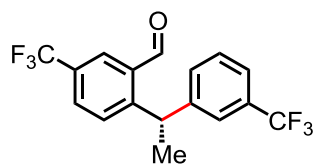

**(S)-5-(trifluoromethyl)-2-(1-(3-(trifluoromethyl)phenyl)ethyl)benzaldehyde (6f)**

The compound **6f** was prepared according to the general procedure at 110 °C and was purified by preparative TLC to give a colorless oil in 77% yield (53 mg).

<sup>1</sup>H NMR (CDCl<sub>3</sub>, 600 MHz): δ 10.28 (s, 1H), 8.09 (d, *J* = 2.0 Hz, 1H), 7.79 (dd, *J* = 8.2, 2.0 Hz, 1H), 7.50-7.45 (m, 3H), 7.42 (t, *J* = 7.7 Hz, 1H), 7.37 (d, *J* = 7.8 Hz, 1H), 5.40 (q, *J* = 7.2 Hz, 1H), 1.71 (d, *J* = 7.2 Hz, 3H);

<sup>13</sup>C NMR (CDCl<sub>3</sub>, 150 MHz): δ 190.98, 151.18, 145.38, 133.46, 131.34, 131.02 (q, *J*<sub>CF</sub> = 32.1 Hz), 130.31 (q, *J*<sub>CF</sub> = 3.4 Hz), 129.85 (q, *J*<sub>CF</sub> = 3.4 Hz), 129.68 (q, *J*<sub>CF</sub> = 33.6 Hz), 129.29, 129.12, 124.02 (q, *J*<sub>CF</sub> = 272.6 Hz), 124.31 (q, *J*<sub>CF</sub> = 3.4 Hz), 123.59 (q, *J*<sub>CF</sub> = 3.6 Hz), 123.45 (q, *J*<sub>CF</sub> = 272.5 Hz), 38.73, 21.87;

<sup>19</sup>F NMR (CDCl<sub>3</sub>, 376 MHz): δ -62.85, -63.17;

HPLC Chiralpak® AS-H column (1% isopropanol in hexanes, 0.5 mL/min) *t*<sub>r</sub> = 9.45 min (minor), 10.41 min (major): 98:2 er.

IR (neat): 1704, 1619, 1325, 1161, 1115, 1074, 900, 846, 804, 771, 702 cm<sup>-1</sup>;

HRMS (ESI-TOF): *m/z* calculated for C<sub>17</sub>H<sub>13</sub>F<sub>6</sub>O<sup>+</sup> [M+H]<sup>+</sup> 347.0865, found 347.0866.

The absolute stereochemistry was assigned by analogy to compound **6c**.

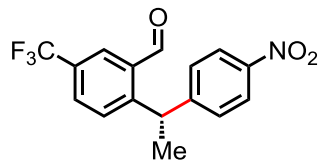

**(S)-2-(1-(4-nitrophenyl)ethyl)-5-(trifluoromethyl)benzaldehyde (6g)**

The compound **6g** was prepared according to the general procedure at 110 °C and was purified by preparative TLC to give a colorless oil in 63% yield (41 mg).

<sup>1</sup>H NMR (CDCl<sub>3</sub>, 600 MHz): δ 10.22 (s, 1H), 8.17-8.14 (m, 2H), 8.09 (d, *J* = 2.0 Hz, 1H), 7.82 (dd, *J* = 8.2, 2.0 Hz, 1H), 7.51 (d, *J* = 8.1 Hz, 1H), 7.38-7.35 (m, 2H), 5.48 (q, *J* = 7.2 Hz, 1H), 1.72 (d, *J* = 7.2 Hz, 3H);

<sup>13</sup>C NMR (CDCl<sub>3</sub>, 150 MHz): δ 191.14, 152.06, 150.18, 146.61, 133.51, 130.75 (q, *J*<sub>CF</sub> = 3.4 Hz), 130.37 (q, *J*<sub>CF</sub> = 3.4 Hz), 129.97 (q, *J*<sub>CF</sub> = 33.6 Hz), 129.25, 128.66, 123.84, 123.35 (q, *J*<sub>CF</sub> = 272.3 Hz), 38.93, 21.68;

<sup>19</sup>F NMR (CDCl<sub>3</sub>, 376 MHz): δ -63.19;

HPLC Chiralpak® AS-H column (20% isopropanol in hexanes, 0.5 mL/min) *t*<sub>r</sub> = 17.96 min (minor), 24.87 min (major): 98:2 er.

IR (neat): 2360, 2341, 1706, 1598, 1519, 1332, 1167, 1128, 1087, 857 cm<sup>-1</sup>;

HRMS (ESI-TOF): *m/z* calculated for C<sub>16</sub>H<sub>13</sub>F<sub>3</sub>NO<sub>3</sub><sup>+</sup> [M+H]<sup>+</sup> 324.0842, found 324.0850.

The absolute stereochemistry was assigned by analogy to compound **6c**.

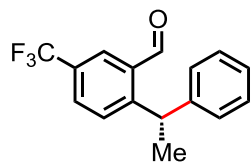

**(S)-2-(1-phenylethyl)-5-(trifluoromethyl)benzaldehyde (6h)**

The compound **6h** was prepared according to the general procedure and was purified by preparative TLC to give a colorless oil in 62% yield (35 mg).

<sup>1</sup>H NMR (CDCl<sub>3</sub>, 600 MHz): δ 10.35 (s, 1H), 8.10 (s, 1H), 7.77 (d, *J* = 8.1 Hz, 1H), 7.50 (d, *J* = 8.2 Hz, 1H), 7.30 (t, *J* = 7.6 Hz, 2H), 7.23-7.18 (m, 3H), 5.25 (q, *J* = 7.1 Hz, 1H), 1.70 (d, *J* = 7.1 Hz, 3H);

<sup>13</sup>C NMR (CDCl<sub>3</sub>, 150 MHz): δ 190.76, 152.26, 144.49, 133.48, 130.13 (q, *J*<sub>CF</sub> = 3.7 Hz), 129.27 (q, *J*<sub>CF</sub> = 33.3 Hz), 129.25, 128.72, 128.29 (q, *J*<sub>CF</sub> = 3.9 Hz), 127.68, 126.66, 123.56 (q, *J*<sub>CF</sub> = 272.5 Hz), 39.01, 22.02;

<sup>19</sup>F NMR (CDCl<sub>3</sub>, 376 MHz): δ -63.12;

HPLC Chiralcel® AS-H column (1% isopropanol in hexanes, 0.5 mL/min) *t*<sub>r</sub> = 10.68 min (minor), 11.76 min (major): 98:2 er.

IR (neat): 1694, 1618, 1328, 1163, 1119, 1083, 900, 846, 752, 720, 699 cm<sup>-1</sup>;

HRMS (ESI-TOF): *m/z* calculated for C<sub>16</sub>H<sub>14</sub>F<sub>3</sub>O<sup>+</sup> [M+H]<sup>+</sup> 279.0991, found 279.0997.

The absolute stereochemistry was assigned by analogy to compound **6c**.

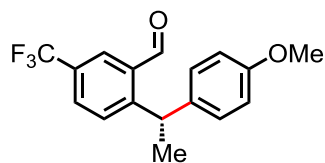

**(S)-2-(1-(4-methoxyphenyl)ethyl)-5-(trifluoromethyl)benzaldehyde (6i)**

The compound **6i** was prepared according to the general procedure and was purified by preparative TLC to give a colorless oil in 63% yield (39 mg).

$^1\text{H}$  NMR ( $\text{CDCl}_3$ , 600 MHz):  $\delta$  10.36 (s, 1H), 8.09 (d,  $J = 1.6$  Hz, 1H), 7.75 (dd,  $J = 8.2, 1.8$  Hz, 1H), 7.48 (d,  $J = 8.2$  Hz, 1H), 7.12-7.07 (m, 2H), 6.87-6.82 (m, 2H), 5.18 (q,  $J = 7.1$  Hz, 1H), 3.78 (s, 3H), 1.67 (d,  $J = 7.2$  Hz, 3H);

$^{13}\text{C}$  NMR ( $\text{CDCl}_3$ , 150 MHz):  $\delta$  190.76, 158.24, 152.73, 136.63, 133.46, 130.11 (q,  $J_{\text{CF}} = 3.5$  Hz), 129.21 (q,  $J_{\text{CF}} = 33.3$  Hz), 129.14, 128.67, 128.19 (q,  $J_{\text{CF}} = 3.6$  Hz), 123.60 (q,  $J_{\text{CF}} = 272.4$  Hz), 114.09, 55.26, 38.26, 22.22;

$^{19}\text{F}$  NMR ( $\text{CDCl}_3$ , 376 MHz):  $\delta$  -63.11;

HPLC Chiralcel® OD-H column (3% isopropanol in hexanes, 0.5 mL/min)  $t_r = 15.85$  min (minor), 16.79 min (major): 95:5 er.

IR (neat): 1702, 1615, 1510, 1246, 1330, 1163, 1121, 1084, 1032, 832  $\text{cm}^{-1}$ ;

HRMS (ESI-TOF):  $m/z$  calculated for  $\text{C}_{17}\text{H}_{16}\text{F}_3\text{O}_2^+$   $[\text{M}+\text{H}]^+$  309.1097, found 309.1098.

The absolute stereochemistry was assigned by analogy to compound **6c**.

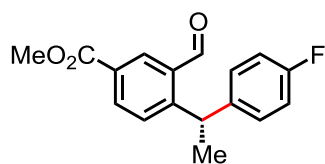

**methyl (S)-3-(1-(4-fluorophenyl)ethyl)-4-formylbenzoate (6j)**

The compound **6j** was prepared according to the general procedure with 0.5 mL of solvent and was purified by preparative TLC to give a colorless oil in 71% yield (41 mg).

$^1\text{H}$  NMR ( $\text{CDCl}_3$ , 600 MHz):  $\delta$  10.27 (s, 1H), 8.47 (d,  $J = 1.9$  Hz, 1H), 8.17 (dd,  $J = 8.2, 1.9$  Hz, 1H), 7.42 (d,  $J = 8.2$  Hz, 1H), 7.18-7.04 (m, 2H), 7.02-6.91 (m, 2H), 5.32 (q,  $J = 7.1$  Hz, 1H), 3.95 (s, 3H), 1.65 (d,  $J = 7.1$  Hz, 3H);

$^{13}\text{C}$  NMR ( $\text{CDCl}_3$ , 150 MHz):  $\delta$  191.79, 165.86, 161.41 (d,  $J_{\text{CF}} = 245.2$  Hz), 153.06, 140.46, 134.38 (d,  $J_{\text{CF}} = 12.1$  Hz), 133.27, 129.23 (d,  $J_{\text{CF}} = 7.9$  Hz), 128.92, 128.74, 115.36 (d,  $J_{\text{CF}} = 21.1$  Hz), 52.40, 38.35, 22.05;

$^{19}\text{F}$  NMR ( $\text{CDCl}_3$ , 376 MHz):  $\delta$  -116.74.

HPLC Chiralpak® AS-H column (5% isopropanol in hexanes, 0.5 mL/min)  $t_r = 23.81$  min (minor), 26.61 min (major): 96:4 er.

IR (neat): 1720, 1695, 1508, 1288, 1221, 1195, 1173, 1160, 835, 746  $\text{cm}^{-1}$ ;

HRMS (ESI-TOF):  $m/z$  calculated for  $\text{C}_{17}\text{H}_{16}\text{FO}_3^+$   $[\text{M}+\text{H}]^+$  287.1078, found 287.1079.



The absolute stereochemistry was assigned by analogy to compound **6c**.

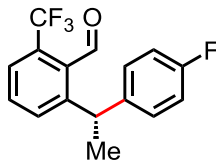

**(S)-2-(1-(4-fluorophenyl)ethyl)-6-(trifluoromethyl)benzaldehyde (6k)**

The compound **6k** was prepared according to the general procedure with 0.5 mL of solvent at 110 °C and was purified by preparative TLC to give a colorless oil in 69% yield (41 mg).

<sup>1</sup>H NMR (CDCl<sub>3</sub>, 600 MHz): δ 10.50 (q, *J* = 2.9 Hz, 1H), 7.63 (d, *J* = 7.6 Hz, 1H), 7.53 (t, *J* = 7.9 Hz, 1H), 7.48 (d, *J* = 7.9 Hz, 1H), 7.17-7.14 (m, 2H), 7.00-6.96 (m, 2H), 4.94 (q, *J* = 7.2 Hz, 1H), 1.61 (d, *J* = 7.2 Hz, 3H);

<sup>13</sup>C NMR (CDCl<sub>3</sub>, 150 MHz): δ 192.92, 161.40 (d, *J*<sub>CF</sub> = 245.4 Hz), 148.24, 140.41 (d, *J*<sub>CF</sub> = 3.2 Hz), 133.45, 132.43, 131.61, 130.41 (q, *J*<sub>CF</sub> = 31.6 Hz), 129.32 (d, *J*<sub>CF</sub> = 7.7 Hz), 124.17 (q, *J*<sub>CF</sub> = 5.8 Hz), 123.83 (q, *J*<sub>CF</sub> = 274.7 Hz), 115.27 (d, *J*<sub>CF</sub> = 21.3 Hz), 38.48, 22.14;

<sup>19</sup>F NMR (CDCl<sub>3</sub>, 376 MHz): δ -55.93, -116.86;

HPLC Chiralpak® AS-H column (1% isopropanol in hexanes, 0.5 mL/min) *t*<sub>r</sub> = 9.42 min (minor), 11.01 min (major): 97:3 er.

IR (neat): 1707, 1602, 1509, 1308, 1225, 1162, 1121, 838, 809 cm<sup>-1</sup>;

HRMS (ESI-TOF): *m/z* calculated for C<sub>16</sub>H<sub>13</sub>F<sub>4</sub>O<sup>+</sup> [M+H]<sup>+</sup> 297.0897, found 297.0893.

The absolute stereochemistry was assigned by analogy to compound **6c**.

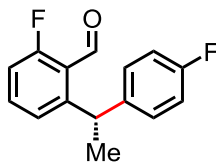

**(S)-2-fluoro-6-(1-(4-fluorophenyl)ethyl)benzaldehyde (6l)**

The compound **6l** was prepared according to the general procedure with 5 mol% Pd(OAc)<sub>2</sub>, 10 mol% *L-tert-leucine* and 1 mL of solvent. The crude residue was purified by preparative TLC to give a colorless oil in 64% yield (32 mg).

<sup>1</sup>H NMR (CDCl<sub>3</sub>, 500 MHz): δ 10.52 (s, 1H), 7.47 (td, *J* = 8.1, 5.8 Hz, 1H), 7.18-7.15 (m, 2H), 7.08 (d, *J* = 7.9 Hz, 1H), 7.04-7.00 (m, 1H), 6.97-6.94 (m, 2H), 5.34 (q, *J* = 7.2 Hz, 1H), 1.58 (d, *J* = 7.2 Hz, 3H);

<sup>13</sup>C NMR (CDCl<sub>3</sub>, 150 MHz): δ 189.30 (d, *J*<sub>CF</sub> = 12.0 Hz), 166.26 (d, *J*<sub>CF</sub> = 257.9 Hz), 161.29 (d, *J*<sub>CF</sub> = 244.4 Hz), 150.39, 140.84 (d, *J*<sub>CF</sub> = 3.3 Hz), 135.22 (d, *J*<sub>CF</sub> = 10.5 Hz), 129.31 (d, *J*<sub>CF</sub> = 7.9 Hz), 124.22 (d, *J*<sub>CF</sub> = 3.3 Hz), 121.76 (d, *J*<sub>CF</sub> = 5.0 Hz), 115.05 (d, *J*<sub>CF</sub> = 21.2 Hz), 114.05 (d, *J*<sub>CF</sub> = 21.8 Hz), 38.05 (d, *J*<sub>CF</sub> = 2.0 Hz), 22.05;

<sup>19</sup>F NMR (CDCl<sub>3</sub>, 376 MHz): δ -117.25, -120.78;

HPLC Chiralpak® AS-H column (3% isopropanol in hexanes, 0.5 mL/min) *t*<sub>r</sub> = 9.55 min (minor), 10.29 min (major): 96:4 er.

IR (neat): 1694, 1609, 1570, 1507, 1496, 1417, 1284, 1221, 1158, 825, 797, 735  $\text{cm}^{-1}$ ;  
HRMS (ESI-TOF):  $m/z$  calculated for  $\text{C}_{15}\text{H}_{13}\text{F}_2\text{O}^+$   $[\text{M}+\text{H}]^+$  247.0929, found 247.0930.  
The absolute stereochemistry was assigned by analogy to compound **6c**.

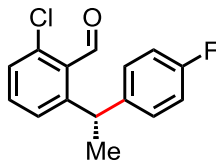

**(S)-2-chloro-6-(1-(4-fluorophenyl)ethyl)benzaldehyde (6m)**

The compound **6m** was prepared according to the general procedure with 5 mol%  $\text{Pd}(\text{OAc})_2$ , 10 mol% *L-tert-leucine* and 1 mL of solvent. The crude residue was purified by preparative TLC to give a colorless oil in 67% yield (35 mg).

$^1\text{H}$  NMR ( $\text{CDCl}_3$ , 600 MHz):  $\delta$  10.59 (s, 1H), 7.38 (t,  $J = 7.9$  Hz, 1H), 7.31 (dd,  $J = 8.0, 1.2$  Hz, 1H), 7.19 (d,  $J = 7.8$  Hz, 1H), 7.17-7.14 (m, 2H), 6.98-6.94 (m, 2H), 5.19 (q,  $J = 7.2$  Hz, 1H), 1.58 (d,  $J = 7.2$  Hz, 3H);

$^{13}\text{C}$  NMR ( $\text{CDCl}_3$ , 150 MHz):  $\delta$  192.88, 161.29 (d,  $J_{CF} = 244.4$  Hz), 150.04, 140.85 (d,  $J_{CF} = 3.4$  Hz), 138.36, 133.53, 130.78, 129.33 (d,  $J_{CF} = 7.8$  Hz), 128.47, 127.40, 115.08 (d,  $J_{CF} = 21.1$  Hz), 37.96, 22.13;

$^{19}\text{F}$  NMR ( $\text{CDCl}_3$ , 376 MHz):  $\delta$  -117.20;

HPLC Chiralpak® AS-H column (3% isopropanol in hexanes, 0.5 mL/min)  $t_r = 9.23$  min (minor), 9.95 min (major): 97:3 er.

IR (neat): 1694, 1587, 1559, 1506, 1450, 1405, 1221, 1178, 1159, 1138, 835, 791, 746, 548  $\text{cm}^{-1}$ ;

HRMS (ESI-TOF):  $m/z$  calculated for  $\text{C}_{15}\text{H}_{13}\text{ClFO}^+$   $[\text{M}+\text{H}]^+$  263.0633, found 263.0627.

The absolute stereochemistry was assigned by analogy to compound **6c**.

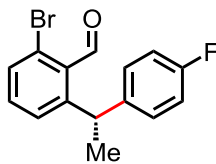

**(S)-2-bromo-6-(1-(4-fluorophenyl)ethyl)benzaldehyde (6n)**

The compound **6n** was prepared according to the general procedure with 5 mol%  $\text{Pd}(\text{OAc})_2$ , 10 mol% *L-tert-leucine* and 1 mL of solvent. The crude residue was purified by preparative TLC to give a colorless oil in 60% yield (37 mg).

$^1\text{H}$  NMR ( $\text{CDCl}_3$ , 500 MHz):  $\delta$  10.45 (s, 1H), 7.51 (dd,  $J = 7.9, 1.0$  Hz, 1H), 7.28 (t,  $J = 7.9$  Hz, 1H), 7.23 (d,  $J = 7.8$  Hz, 1H), 7.16-7.14 (m, 2H), 6.97-6.94 (m, 2H), 5.15 (q,  $J = 7.2$  Hz, 1H), 1.57 (d,  $J = 7.2$  Hz, 3H);

$^{13}\text{C}$  NMR ( $\text{CDCl}_3$ , 150 MHz):  $\delta$  194.75, 161.30 (d,  $J_{CF} = 244.9$  Hz), 150.07, 140.82 (d,  $J_{CF} = 3.1$  Hz), 133.58, 131.99, 131.75, 129.33 (d,  $J_{CF} = 7.8$  Hz), 128.07, 127.22, 115.10 (d,  $J_{CF} = 21.0$  Hz), 37.97, 22.15;

$^{19}\text{F}$  NMR ( $\text{CDCl}_3$ , 376 MHz):  $\delta$  -117.17;

HPLC Chiralpak® AS-H column (3% isopropanol in hexanes, 0.5 mL/min)  $t_r = 9.77$  min (minor), 10.61

min (major): 97:3 er.

IR (neat): 1693.4, 1554.4, 1505.8, 1446.0, 1220.4, 1181.2, 1158.7, 834.5, 781.5, 746.2, 723.7, 545.7  $\text{cm}^{-1}$ ;

HRMS (ESI-TOF):  $m/z$  calculated for  $\text{C}_{15}\text{H}_{13}\text{BrFO}^+$   $[\text{M}+\text{H}]^+$  307.0128, found 307.0129.

The absolute stereochemistry was assigned by analogy to compound **6c**.

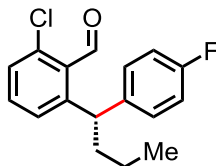

#### (S)-2-chloro-6-(1-(4-fluorophenyl)butyl)benzaldehyde (**6o**)

The compound **6o** was prepared according to the general procedure with 0.5 mL of solvent and was purified by preparative TLC to give a colorless oil in 68% yield (40 mg).

$^1\text{H}$  NMR ( $\text{CDCl}_3$ , 600 MHz):  $\delta$  10.59 (s, 1H), 7.40 (t,  $J = 7.9$  Hz, 1H), 7.32-7.29 (m, 2H), 7.22-7.20 (m, 2H), 6.97-6.93 (m, 2H), 5.06 (t,  $J = 7.7$  Hz, 1H), 1.98-1.87 (m, 2H), 1.30-1.23 (m, 2H), 0.90 (t,  $J = 7.4$  Hz, 1H);

$^{13}\text{C}$  NMR ( $\text{CDCl}_3$ , 150 MHz):  $\delta$  193.07, 161.30 (d,  $J_{CF} = 244.7$  Hz), 148.81, 139.59 (d,  $J_{CF} = 3.3$  Hz), 138.32, 133.44, 131.24, 129.74 (d,  $J_{CF} = 7.8$  Hz), 128.34, 127.16, 115.09 (d,  $J_{CF} = 21.1$  Hz), 43.01, 38.46, 20.91, 14.01;

$^{19}\text{F}$  NMR ( $\text{CDCl}_3$ , 376 MHz):  $\delta$  -117.13;

HPLC Chiralcel® OD-H column (1% isopropanol in hexanes, 0.5 mL/min)  $t_r = 9.34$  min (minor), 10.70 min (major): 97:3 er.

IR (neat): 2957, 2930, 2871, 2361, 2340, 1695, 1587, 1559, 1506, 1452, 1405, 1221, 1178, 1158, 836, 794, 743  $\text{cm}^{-1}$ ;

HRMS (ESI-TOF):  $m/z$  calculated for  $\text{C}_{17}\text{H}_{17}\text{ClFO}^+$   $[\text{M}+\text{H}]^+$  291.0946, found 291.0948.

The absolute stereochemistry was assigned by analogy to compound **6c**.

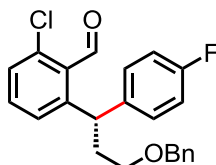

#### (S)-2-(3-(benzyloxy)-1-(4-fluorophenyl)propyl)-6-chlorobenzaldehyde (**6p**)

The compound **6p** was prepared according to the general procedure with 0.5 mL of solvent at 110  $^\circ\text{C}$  and was purified by preparative TLC to give a colorless oil in 54% yield (41 mg).

$^1\text{H}$  NMR ( $\text{CDCl}_3$ , 600 MHz):  $\delta$  10.52 (s, 1H), 7.40 (t,  $J = 7.9$  Hz, 1H), 7.34-7.27 (m, 7H), 7.22-7.20 (m, 2H), 6.95-6.92 (m, 2H), 5.19 (t,  $J = 7.7$  Hz, 1H), 4.42 (s, 2H), 3.43-3.36 (m, 2H), 2.34-2.24 (m, 2H);

$^{13}\text{C}$  NMR ( $\text{CDCl}_3$ , 150 MHz):  $\delta$  192.83, 161.35 (d,  $J_{CF} = 244.3$  Hz), 147.86, 139.06 (d,  $J_{CF} = 3.3$  Hz), 138.19, 138.10, 133.36, 131.47, 129.71 (d,  $J_{CF} = 8.0$  Hz), 128.53, 128.32, 127.62, 127.55, 127.07, 115.16

(d,  $J_{CF} = 21.0$  Hz), 72.92, 67.91, 39.85, 35.93;

$^{19}\text{F}$  NMR ( $\text{CDCl}_3$ , 376 MHz):  $\delta$  -116.87.

HPLC Chiralcel® OD-H column (1% isopropanol in hexanes, 0.5 mL/min)  $t_r = 26.57$  min (minor), 28.09 min (major): 98:2 er.

IR (neat): 1697, 1587, 1507, 1453, 1221, 1159, 1099, 835, 804, 733, 696  $\text{cm}^{-1}$ ;

HRMS (ESI-TOF):  $m/z$  calculated for  $\text{C}_{23}\text{H}_{21}\text{ClFO}_2^+$   $[\text{M}+\text{H}]^+$  383.1209, found 383.1211.

The absolute stereochemistry was assigned by analogy to compound **6c**.

# <sup>1</sup>H and <sup>13</sup>C NMR Spectra

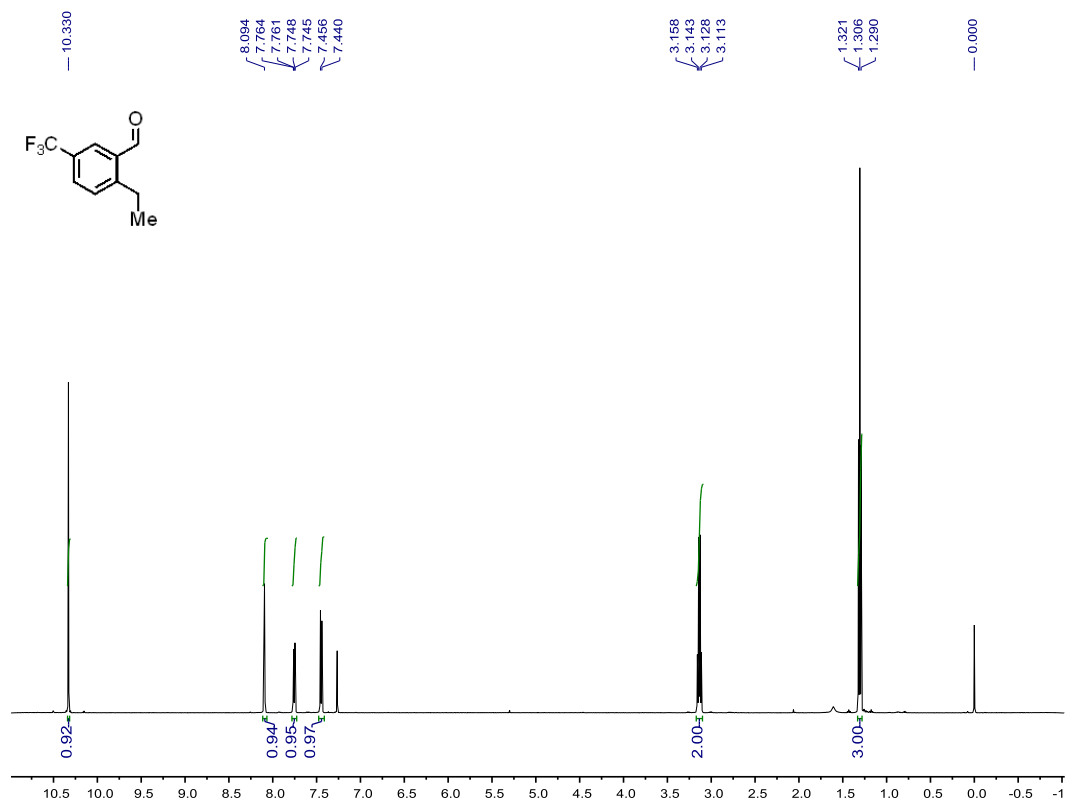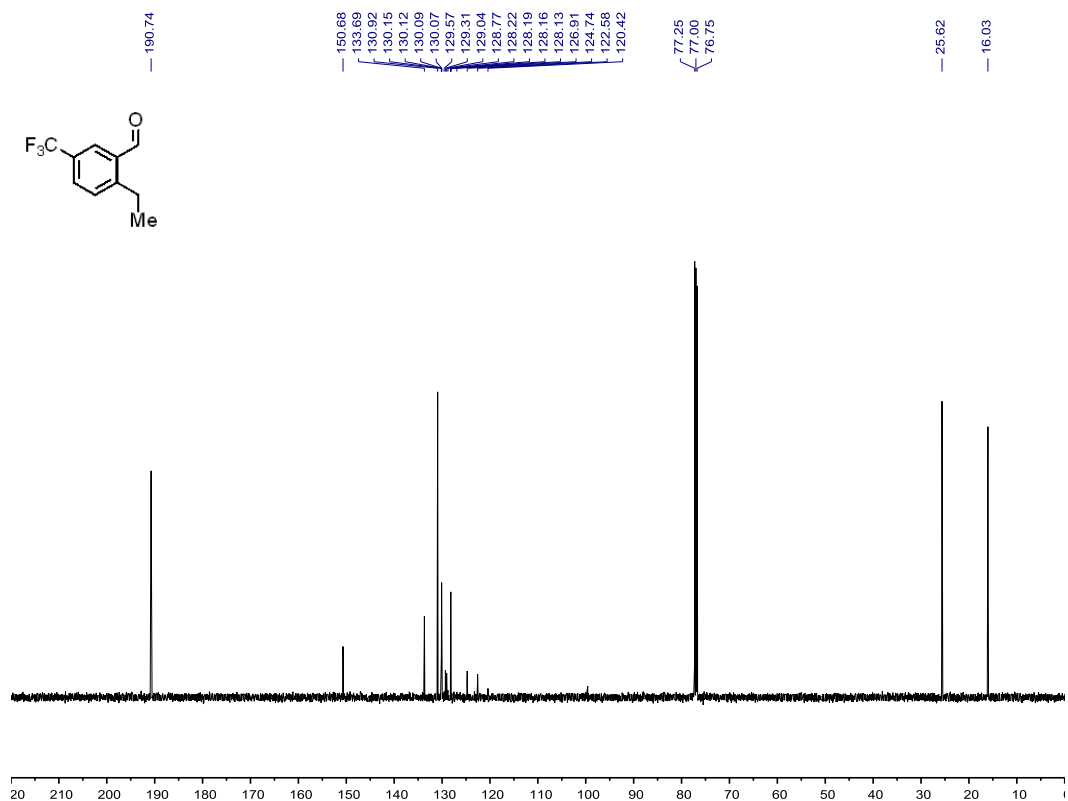

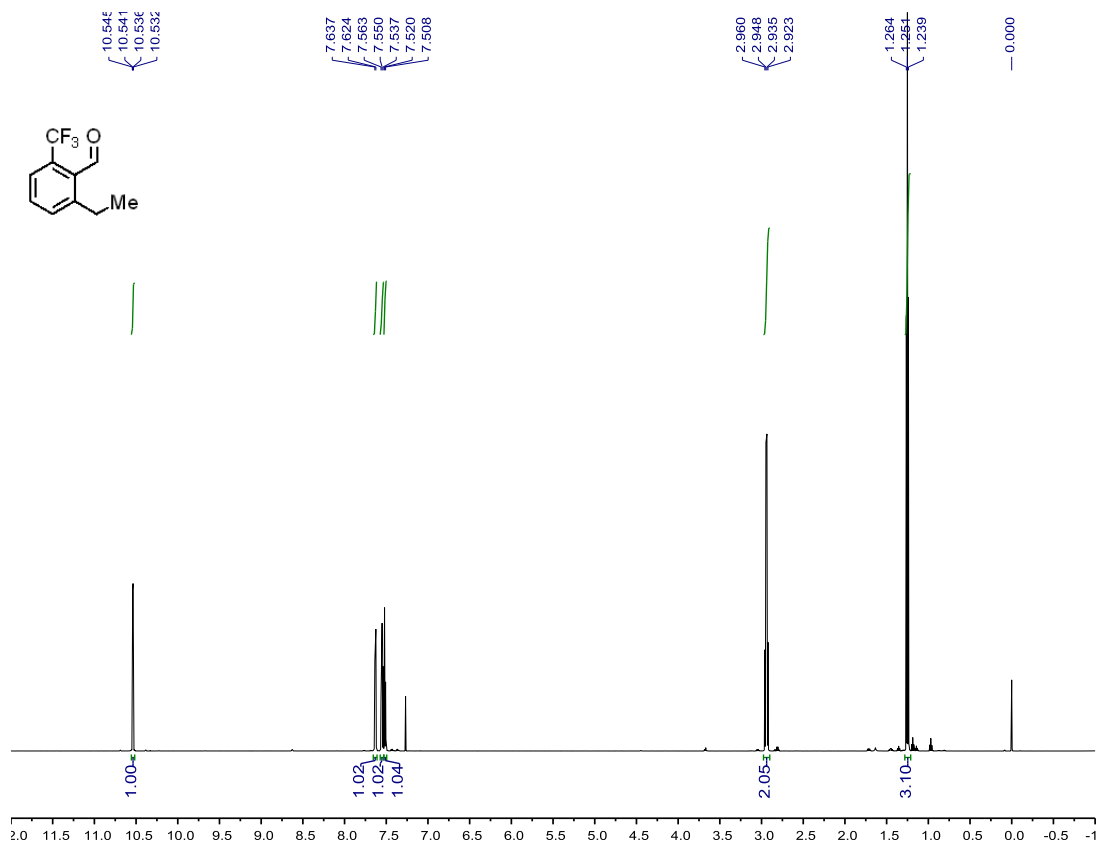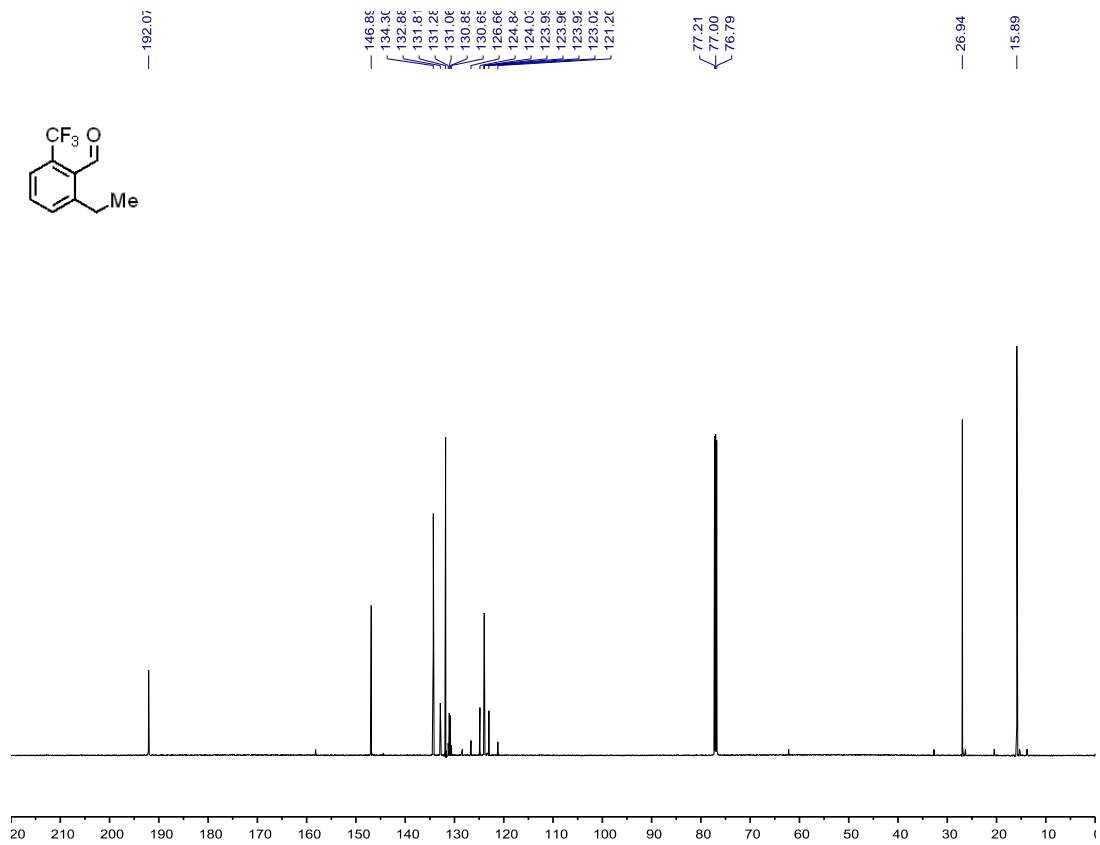

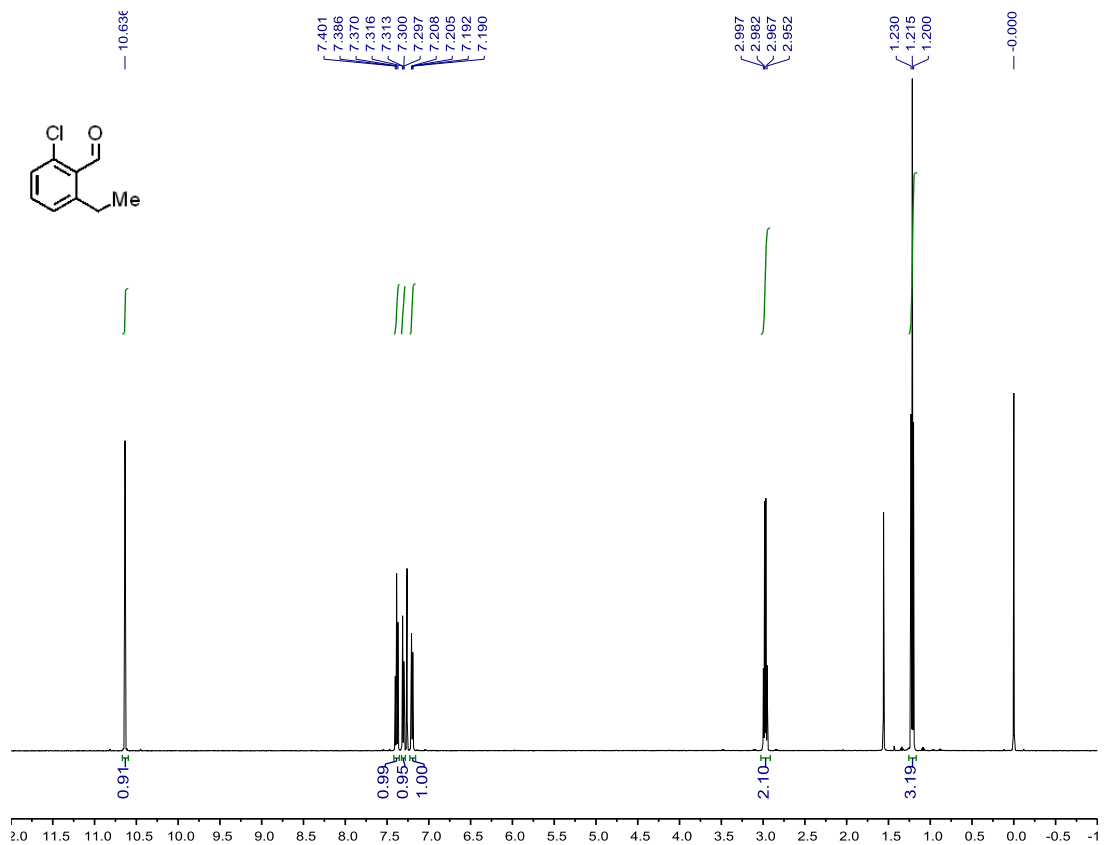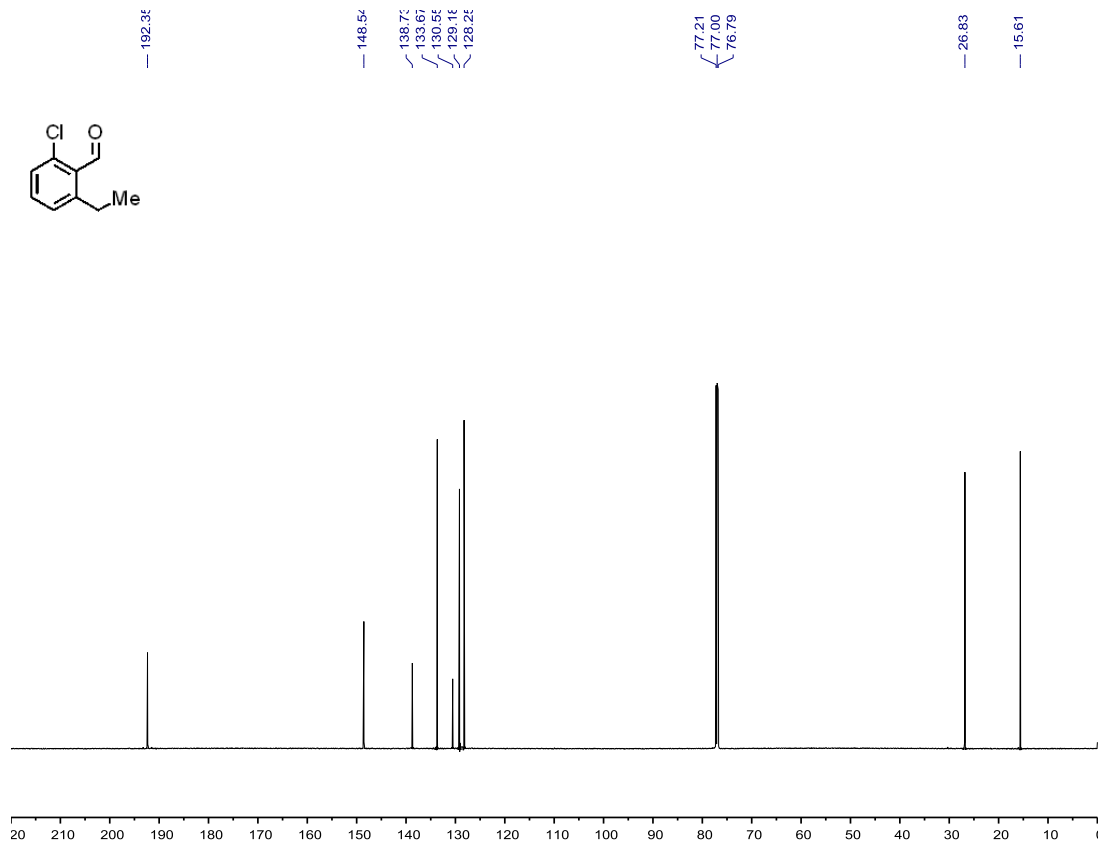

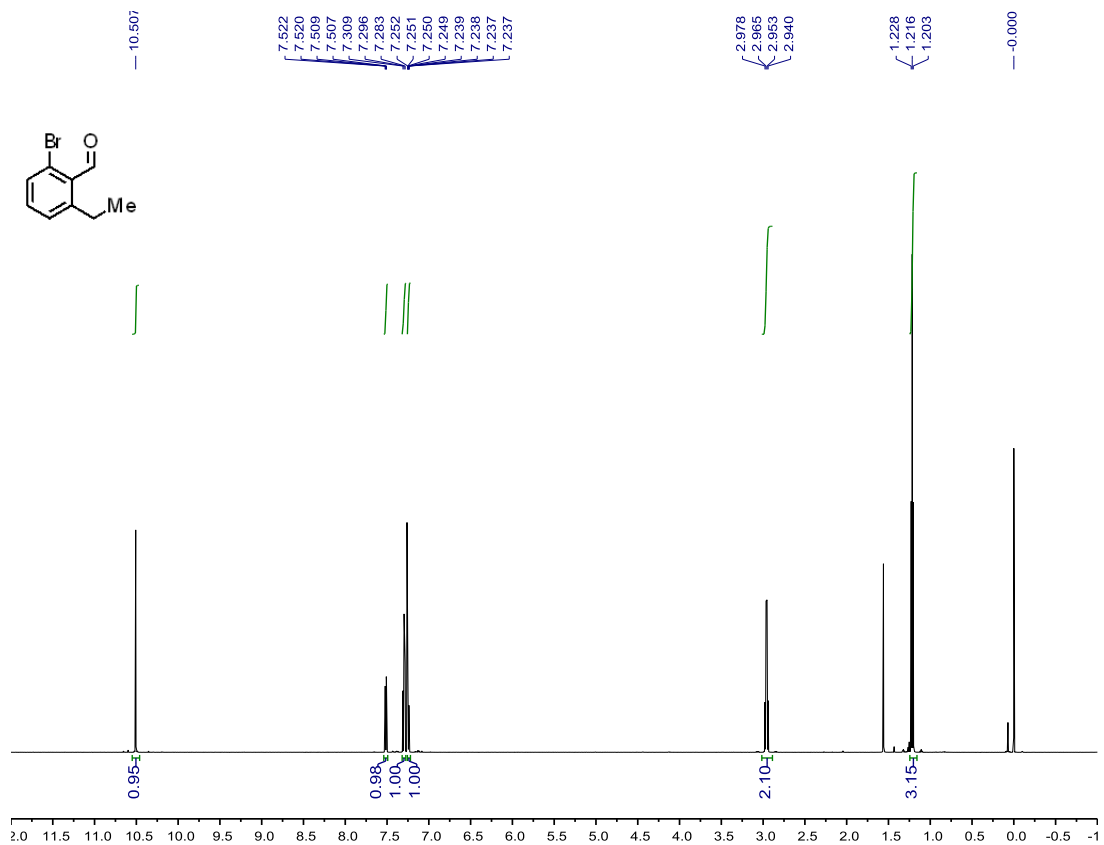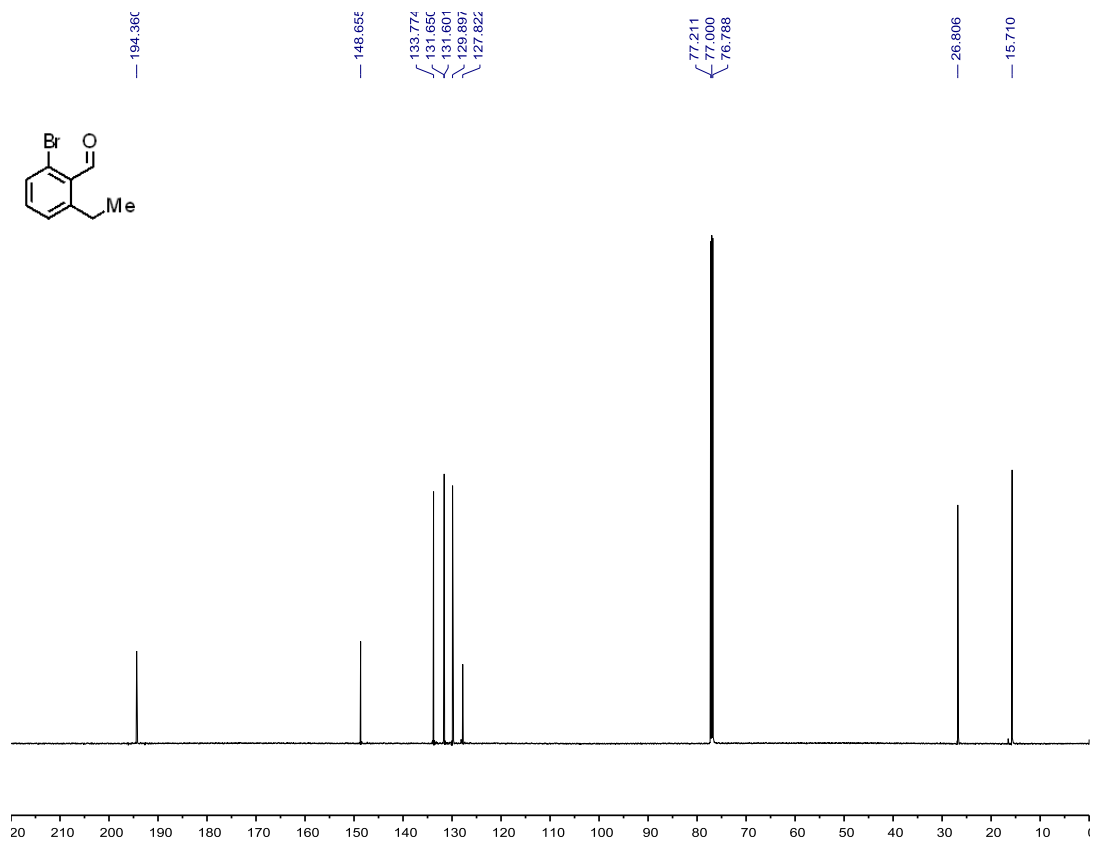



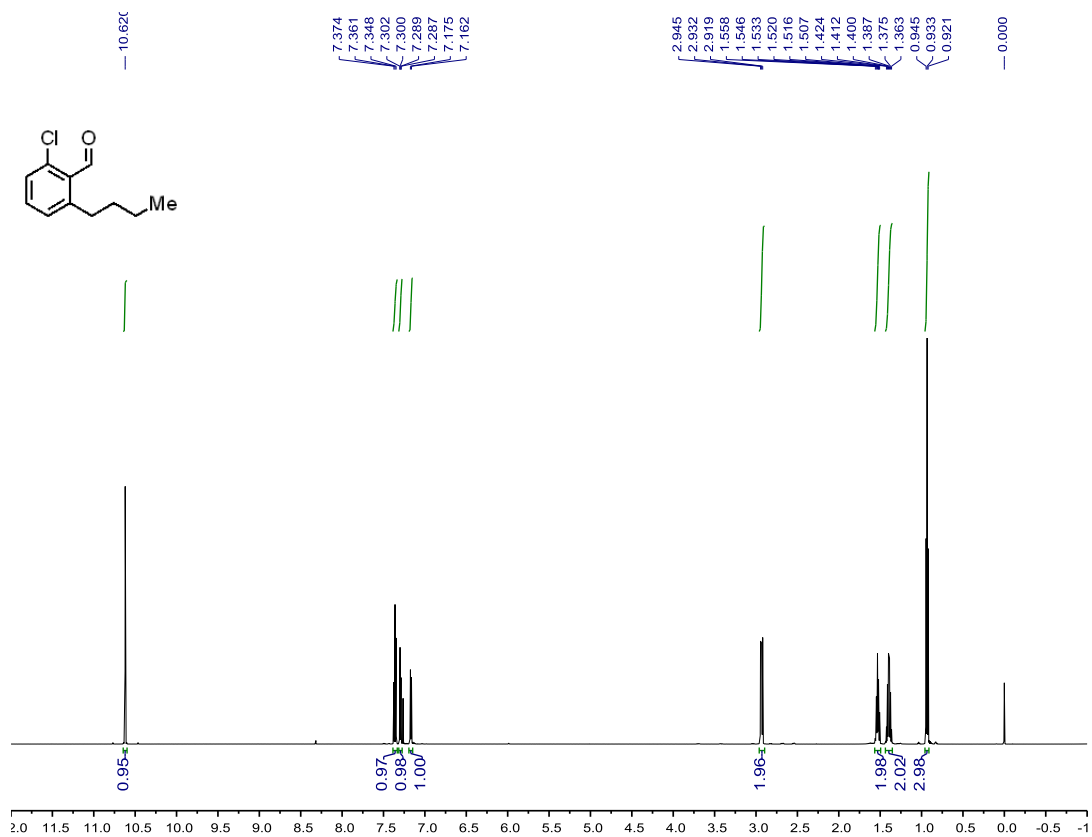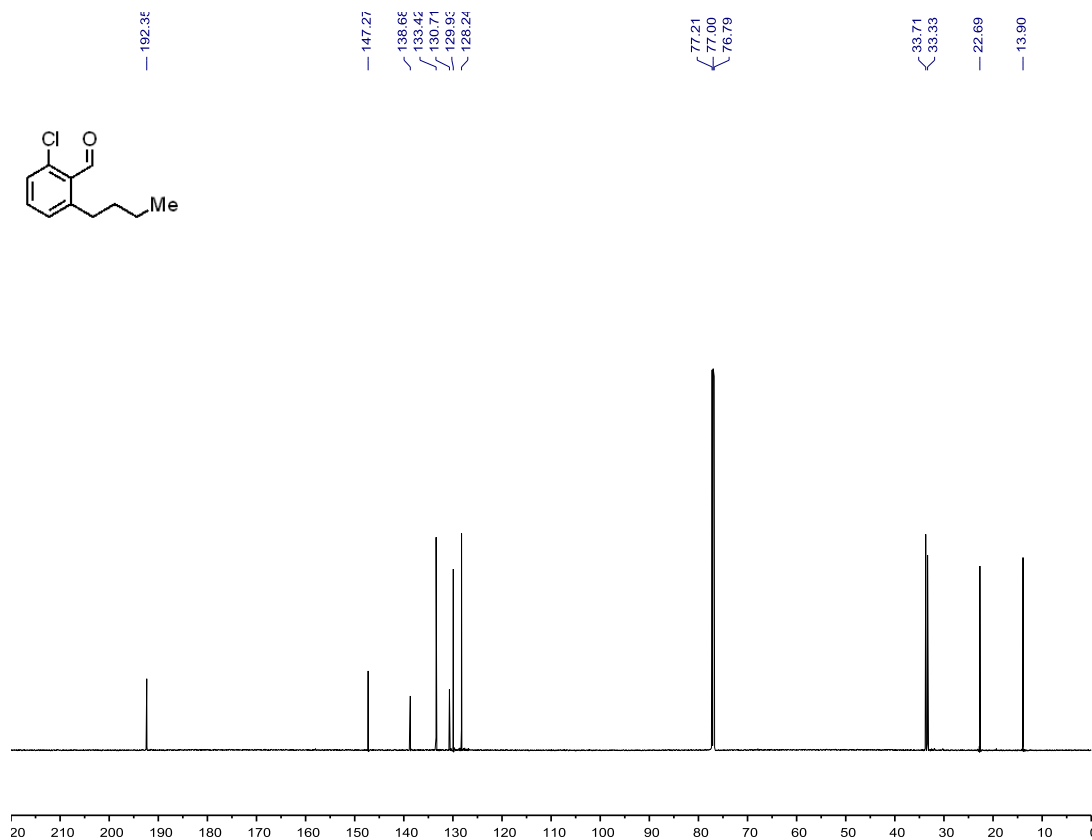

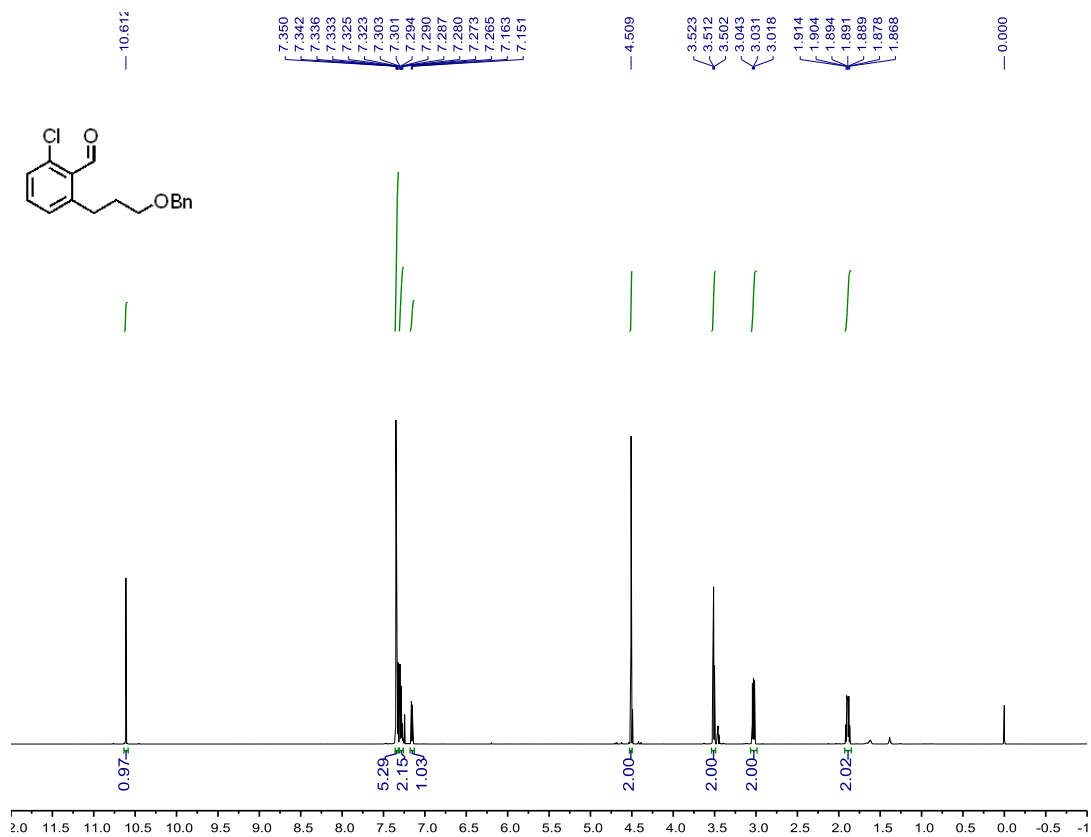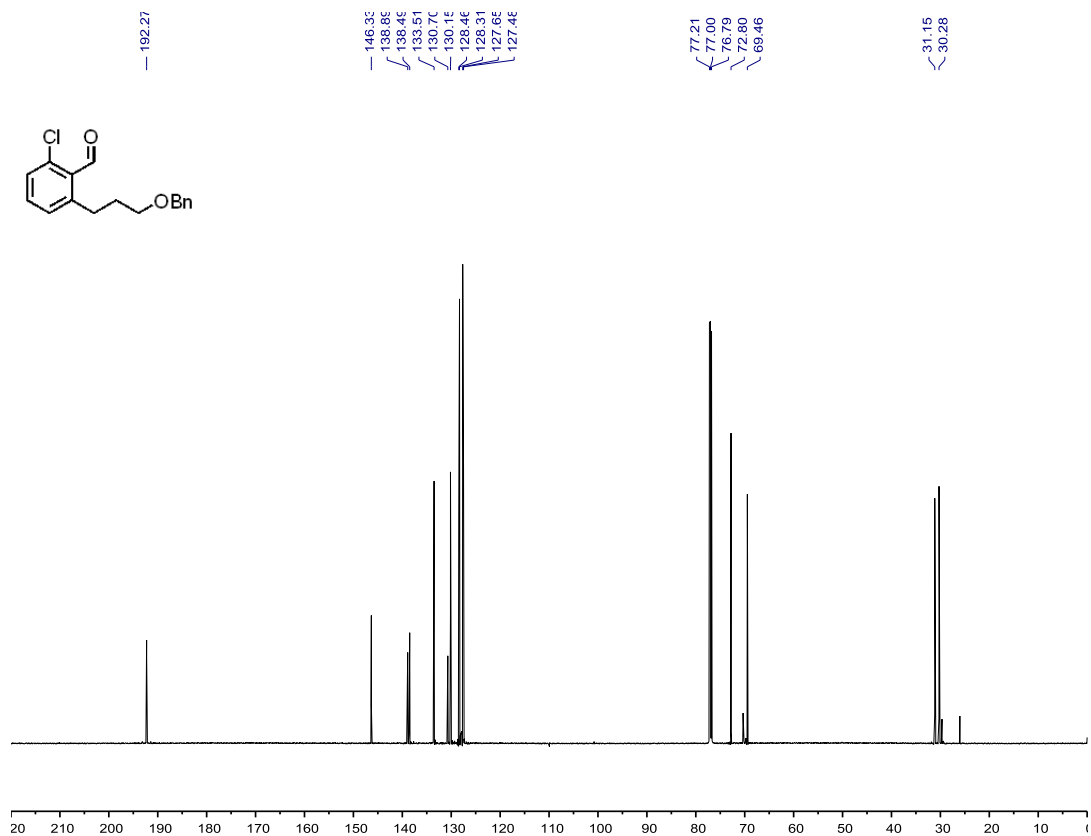

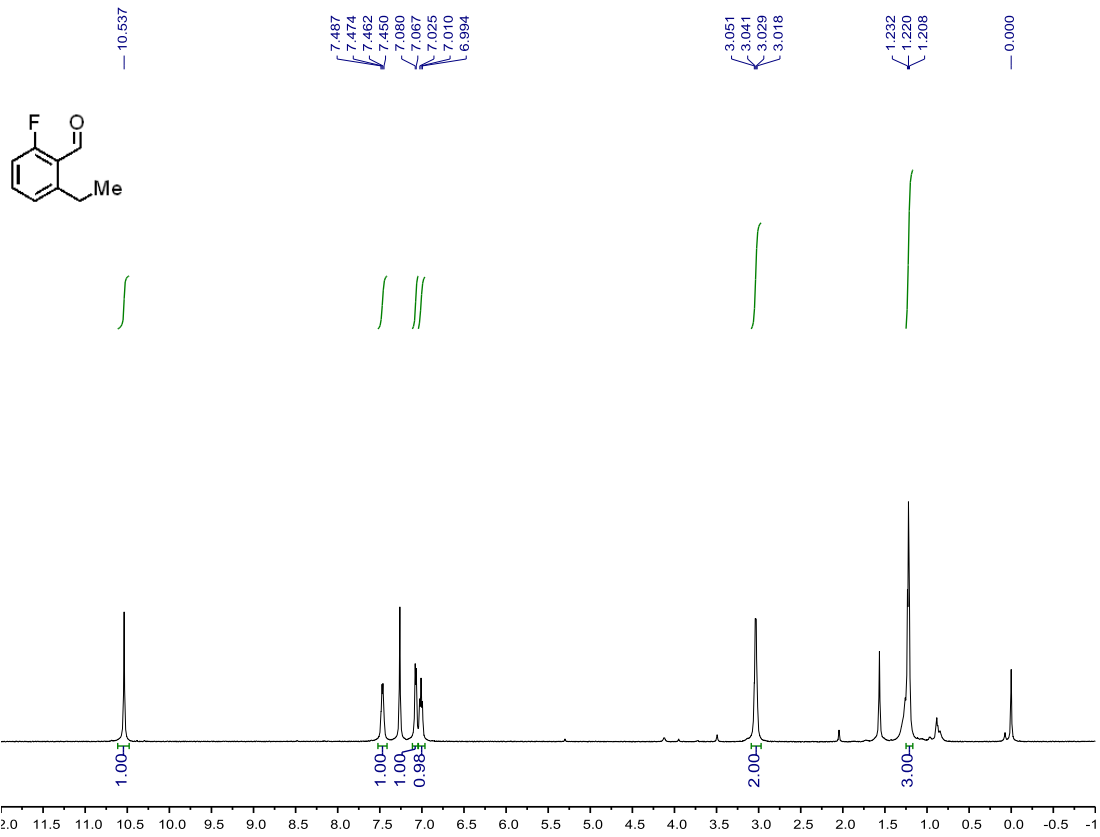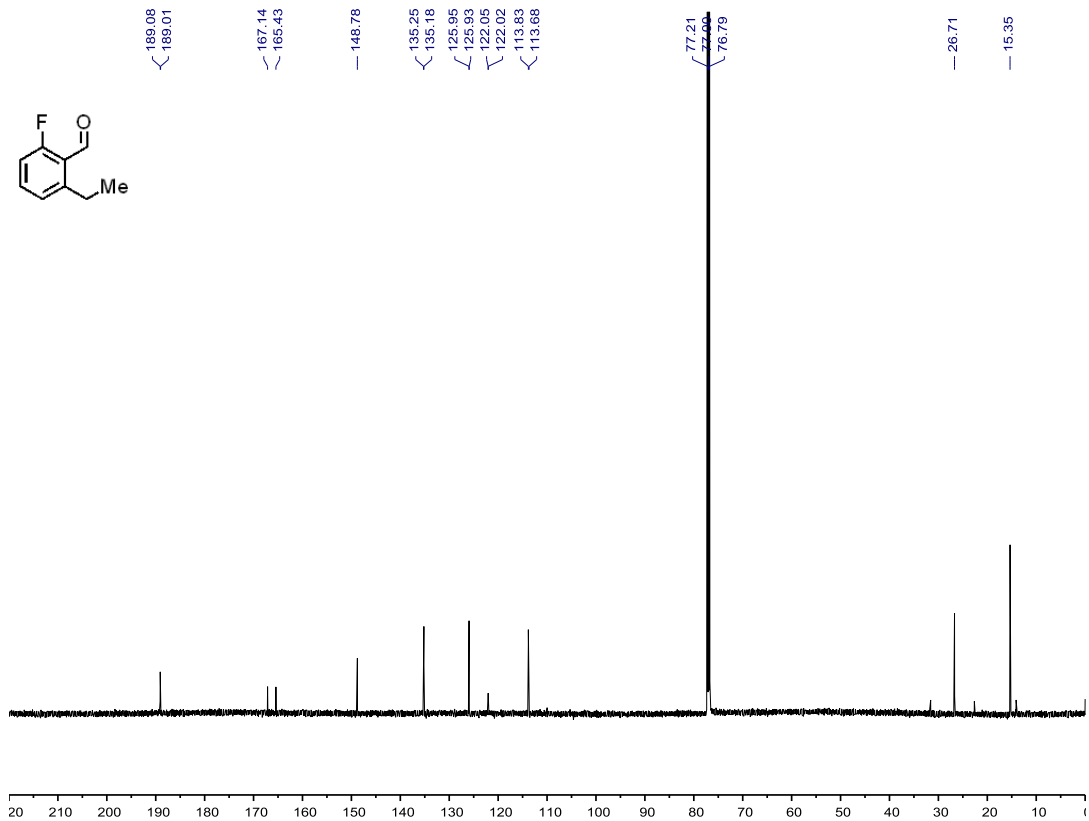

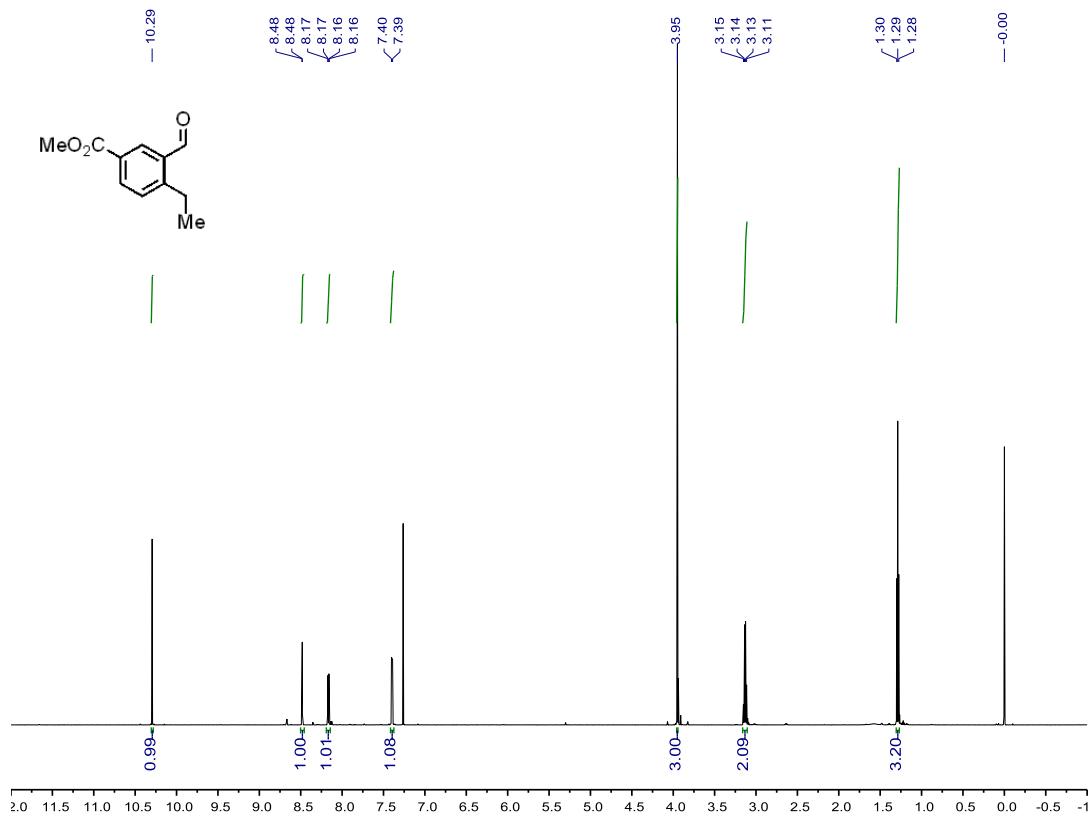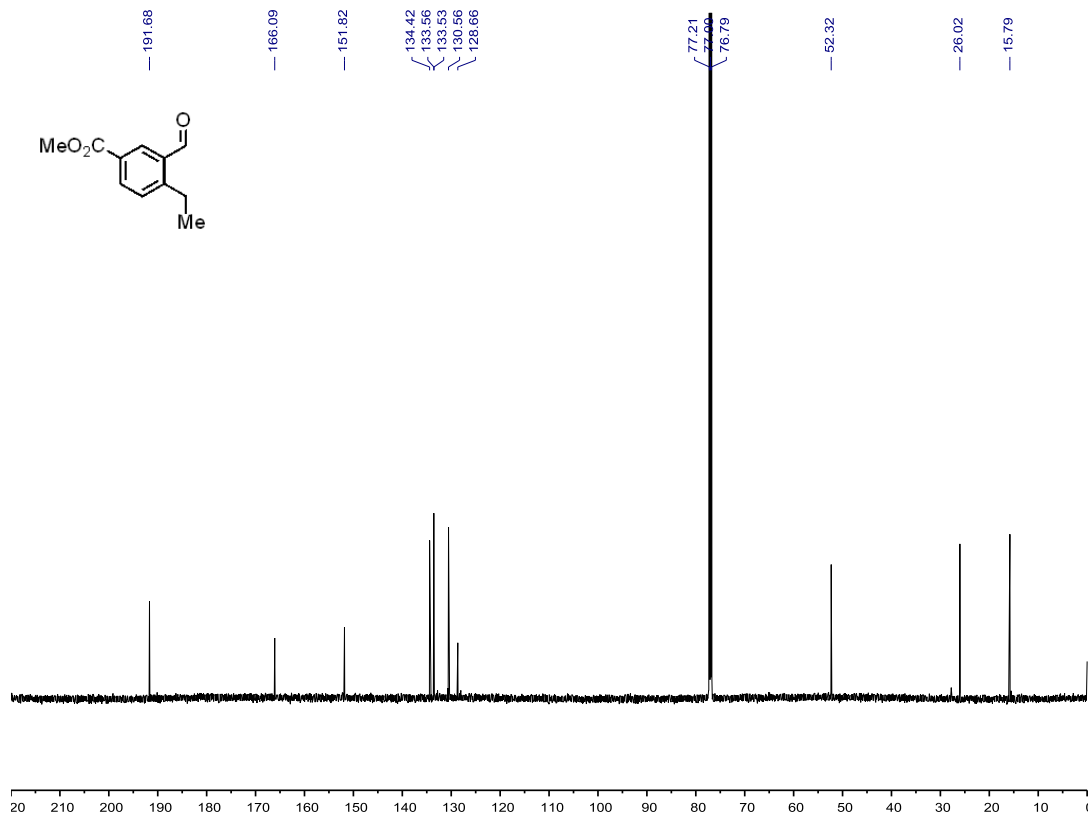

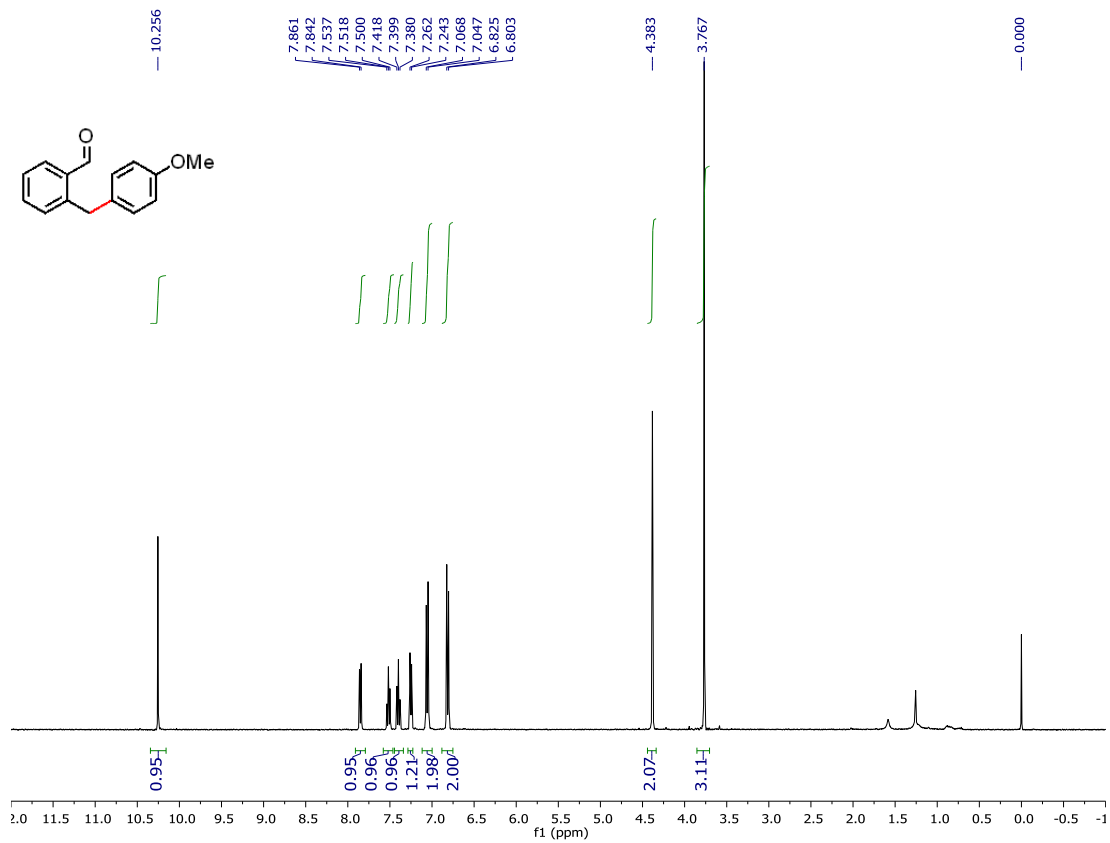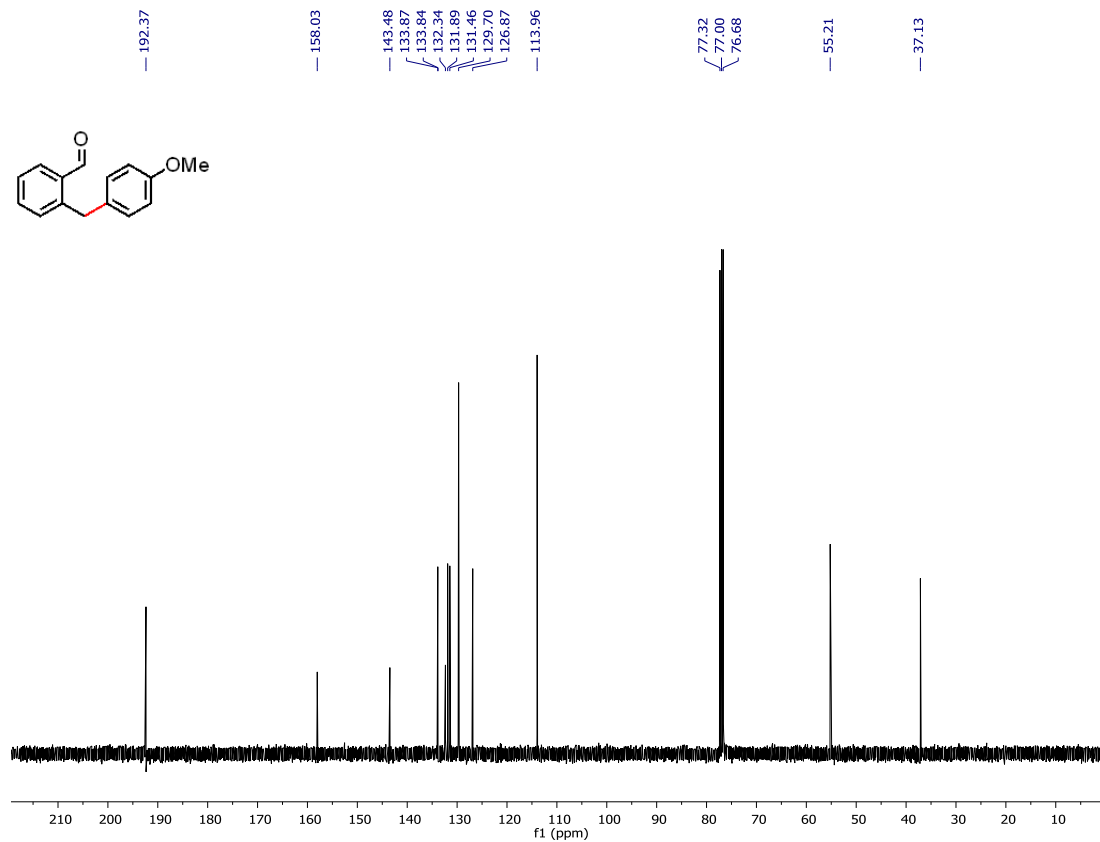

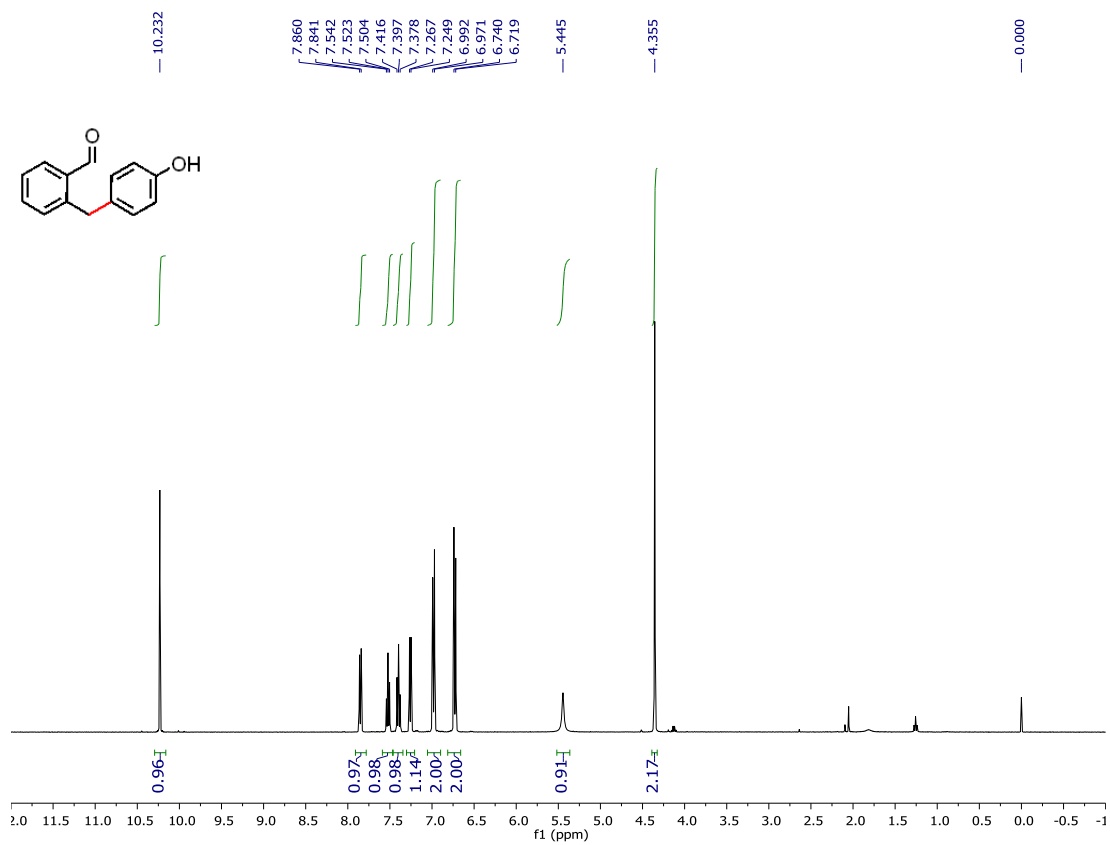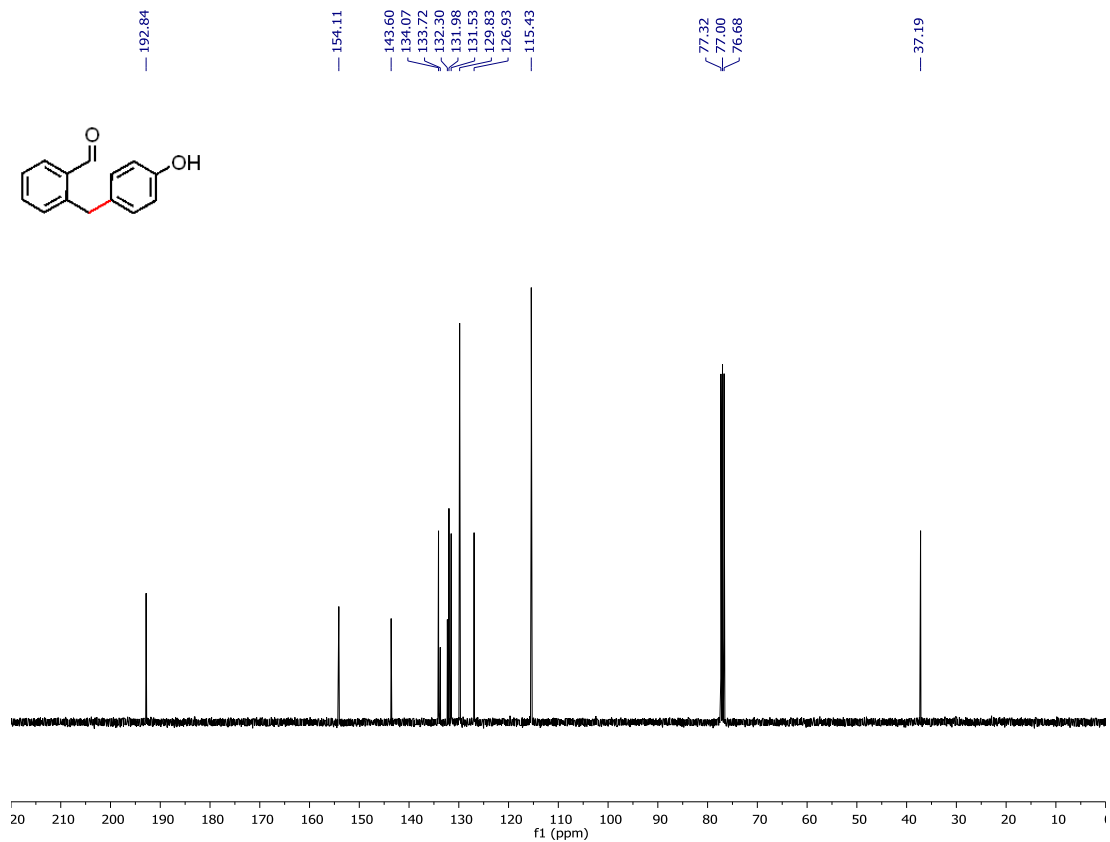

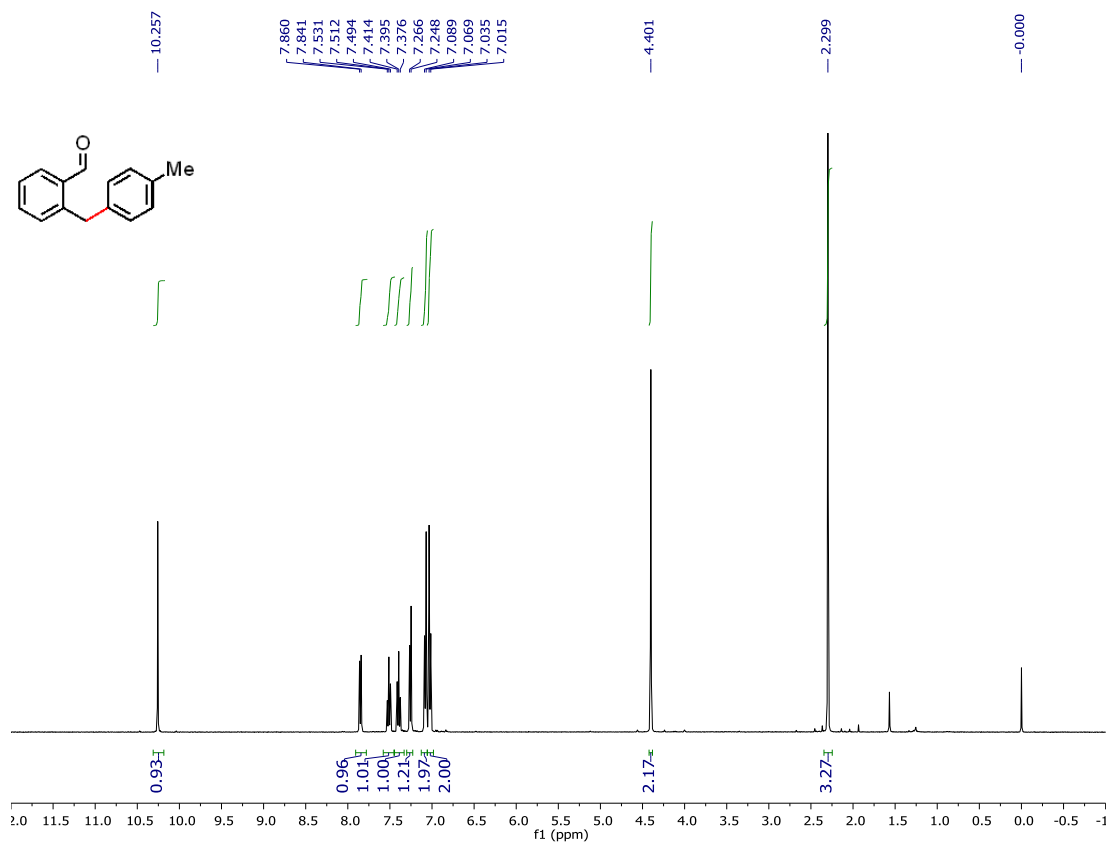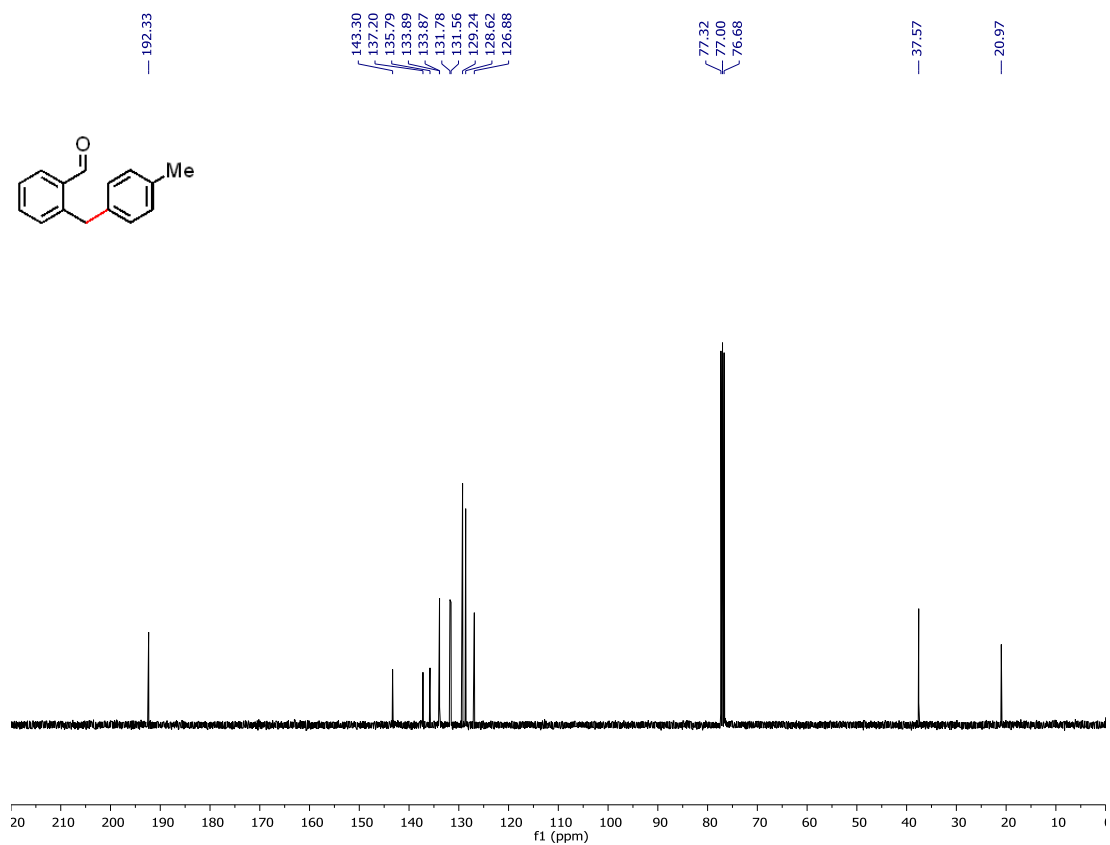

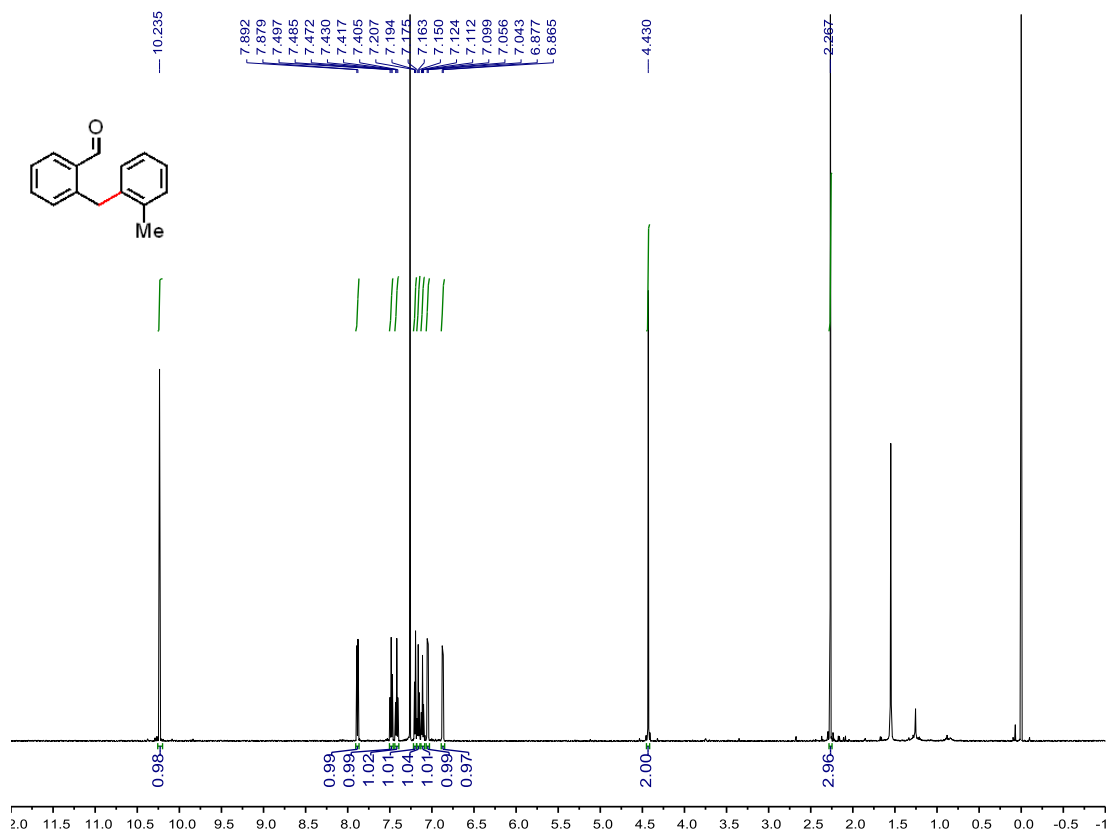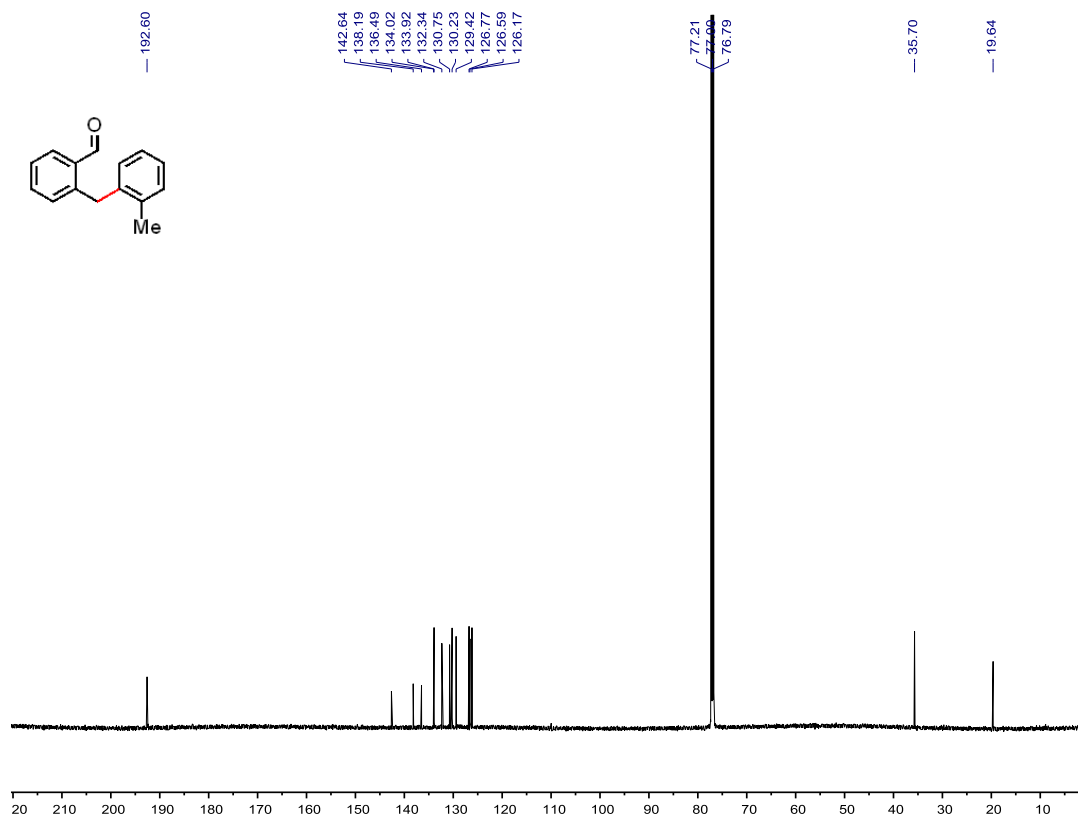



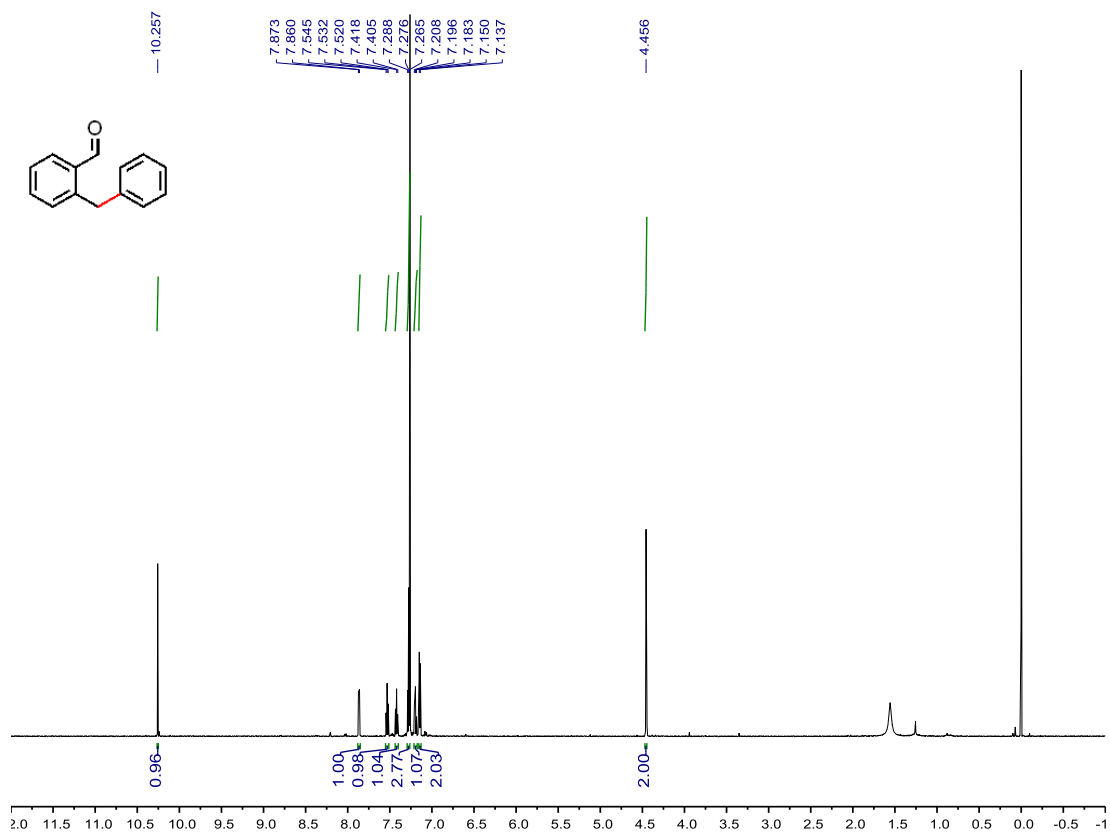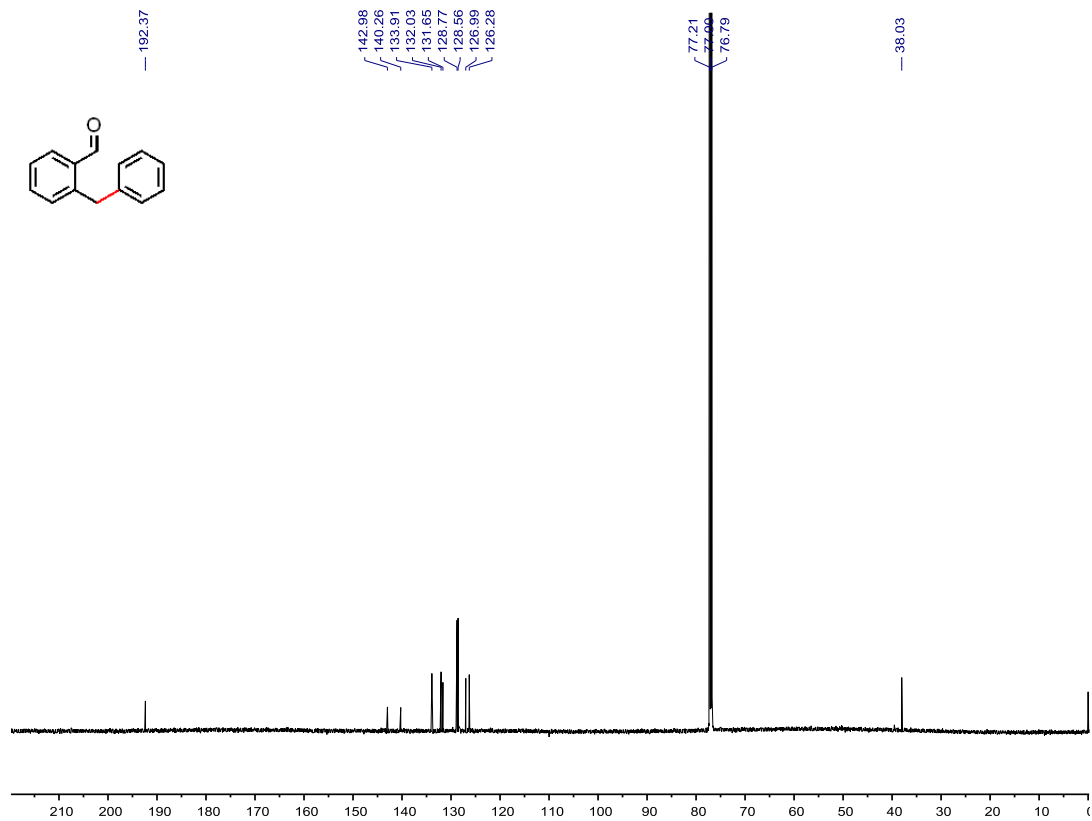

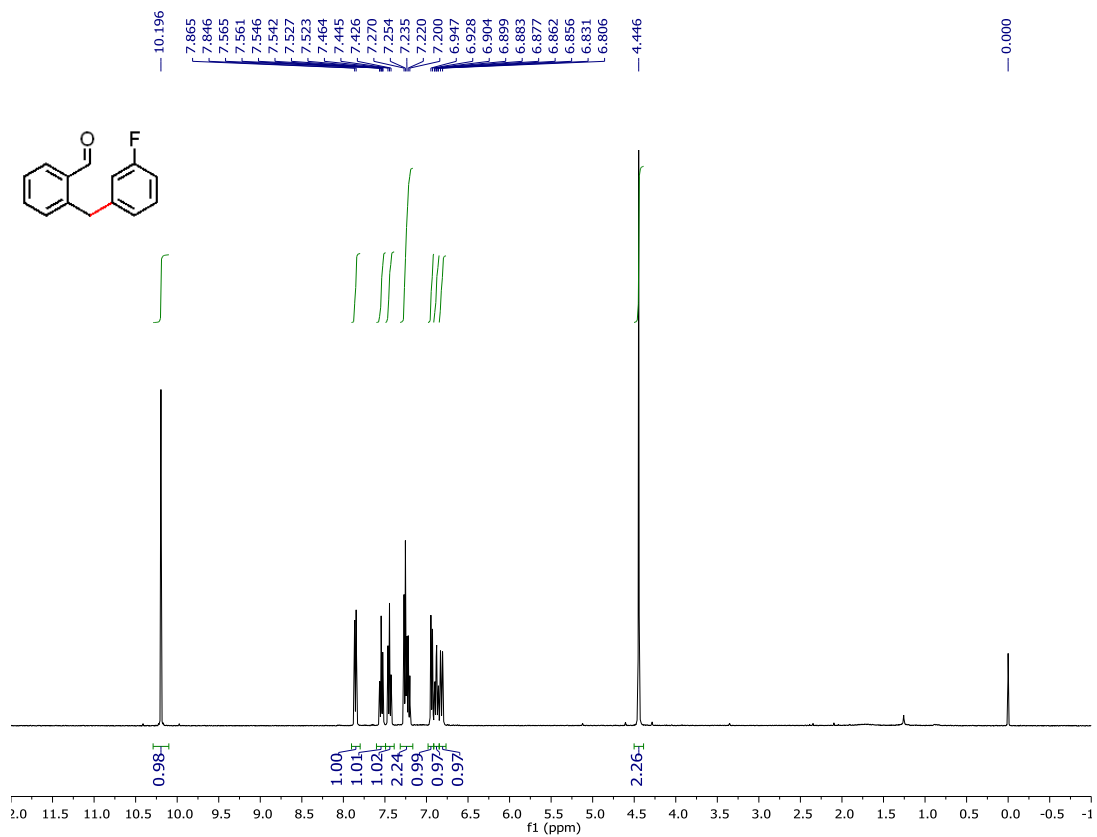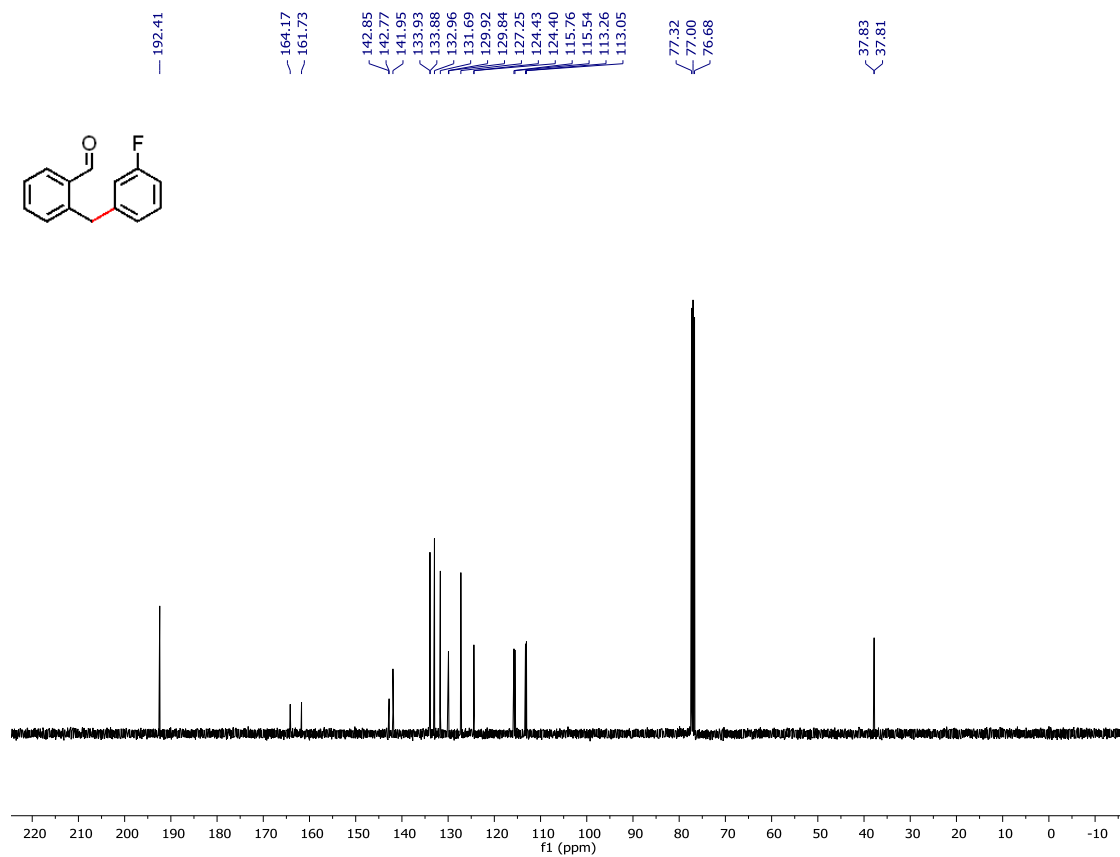

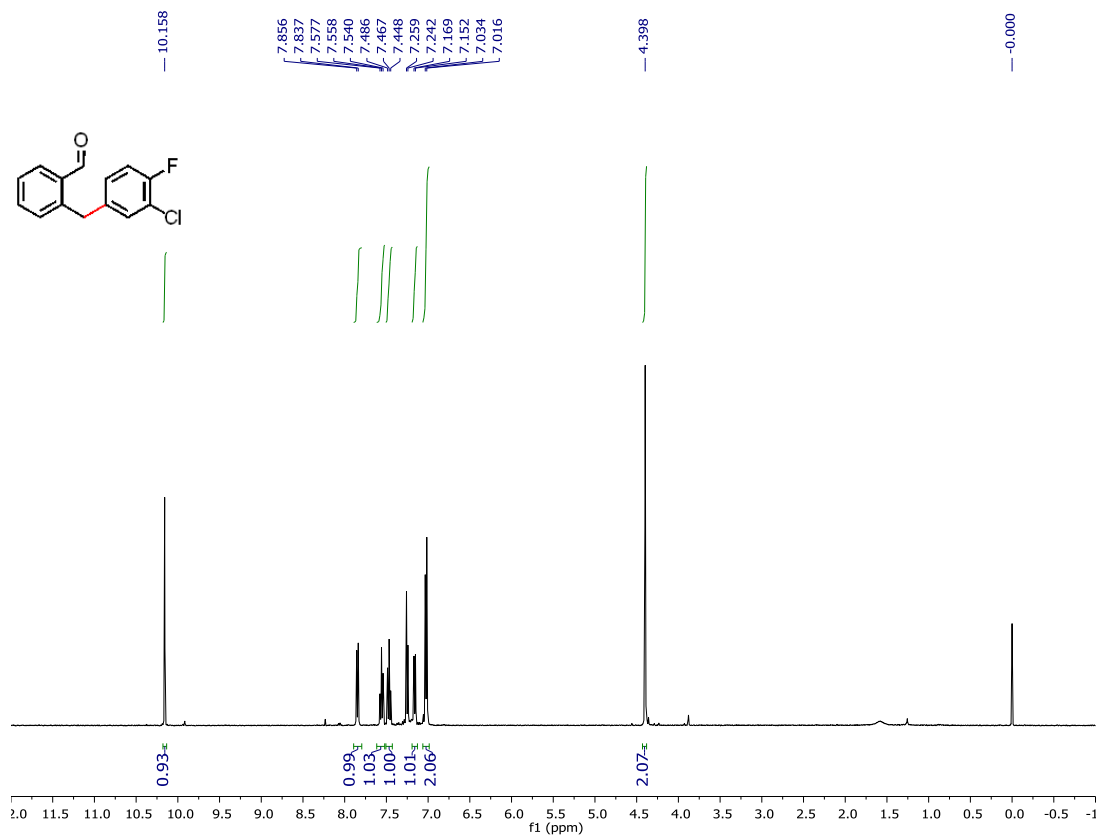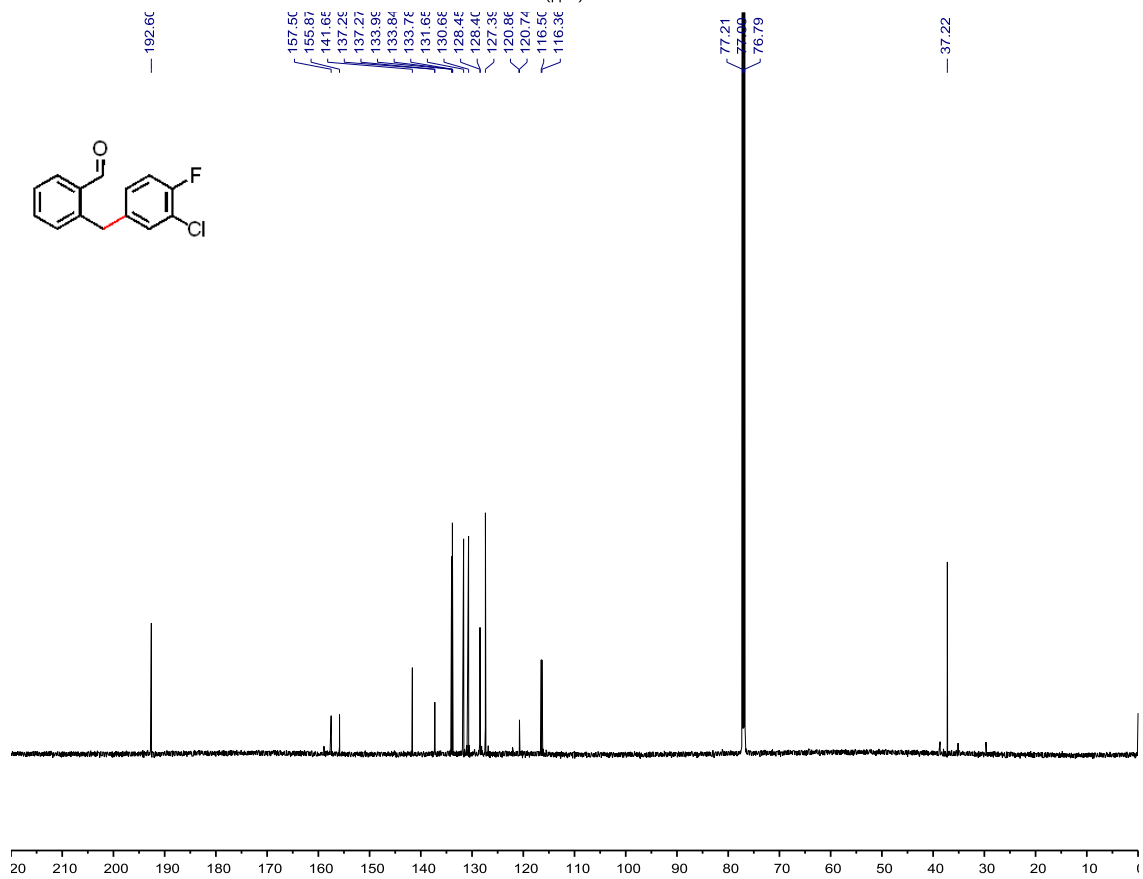

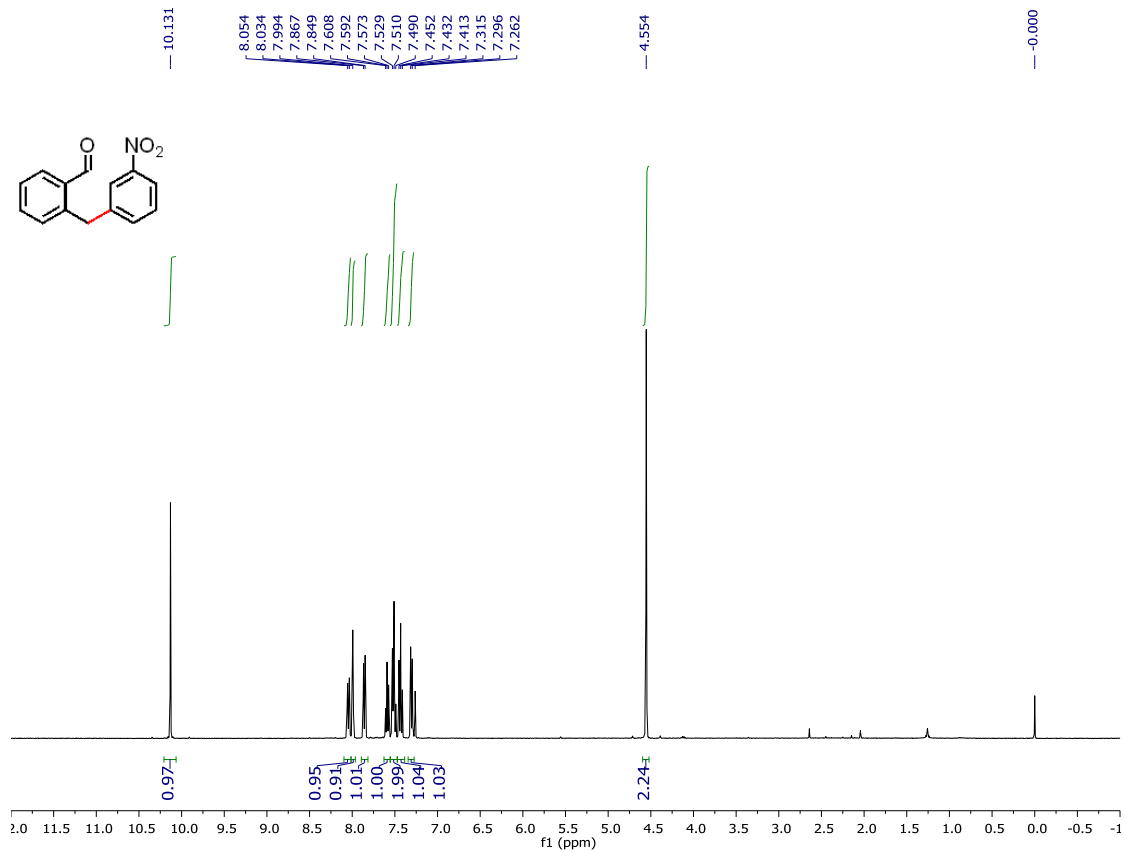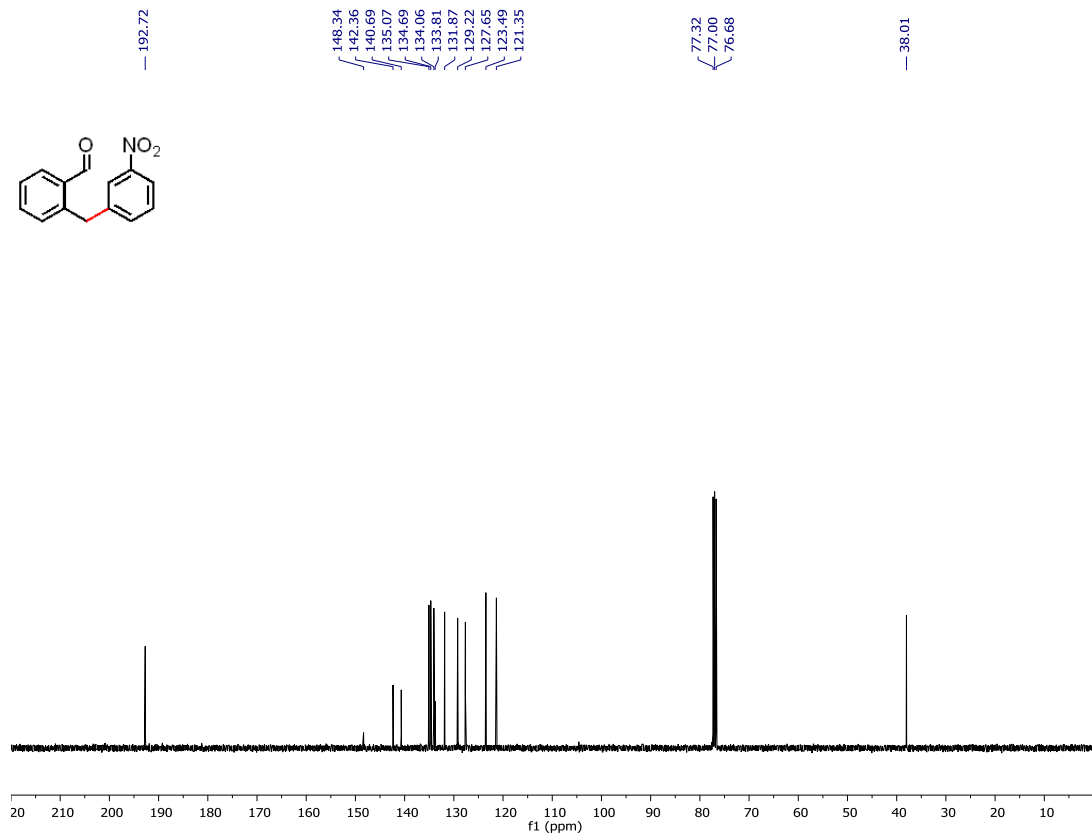

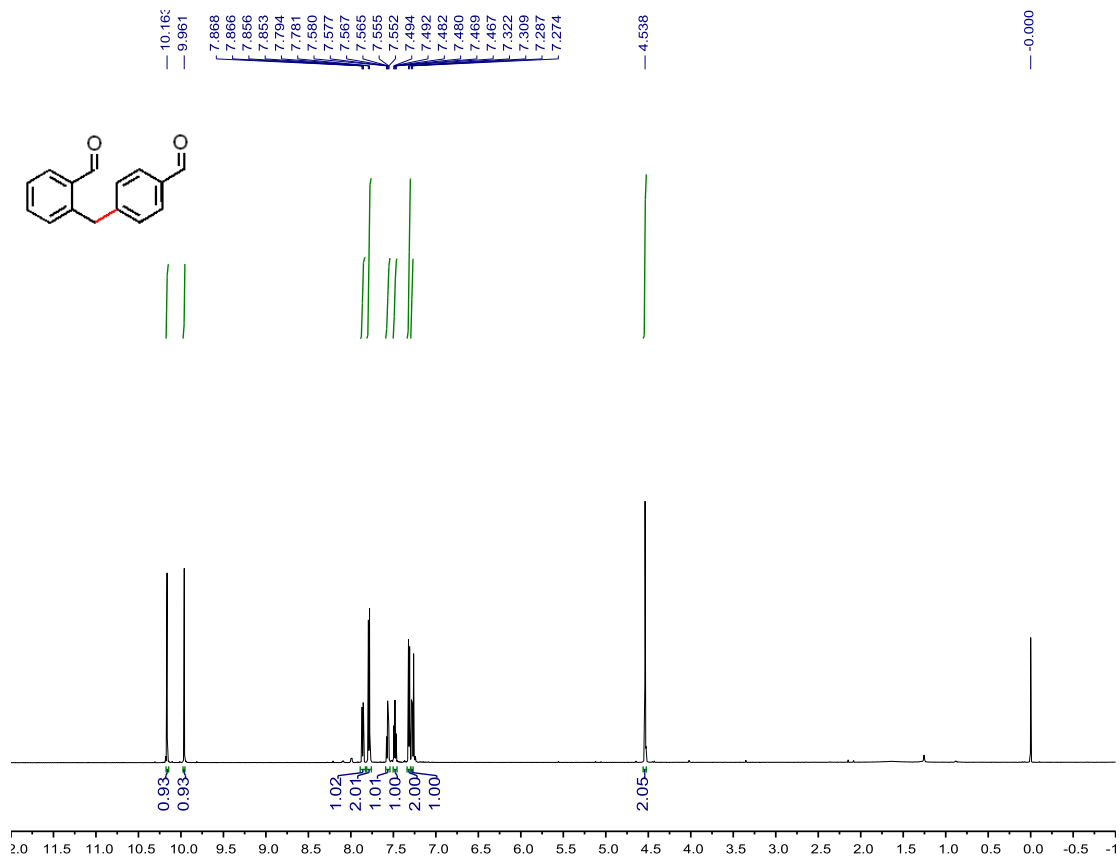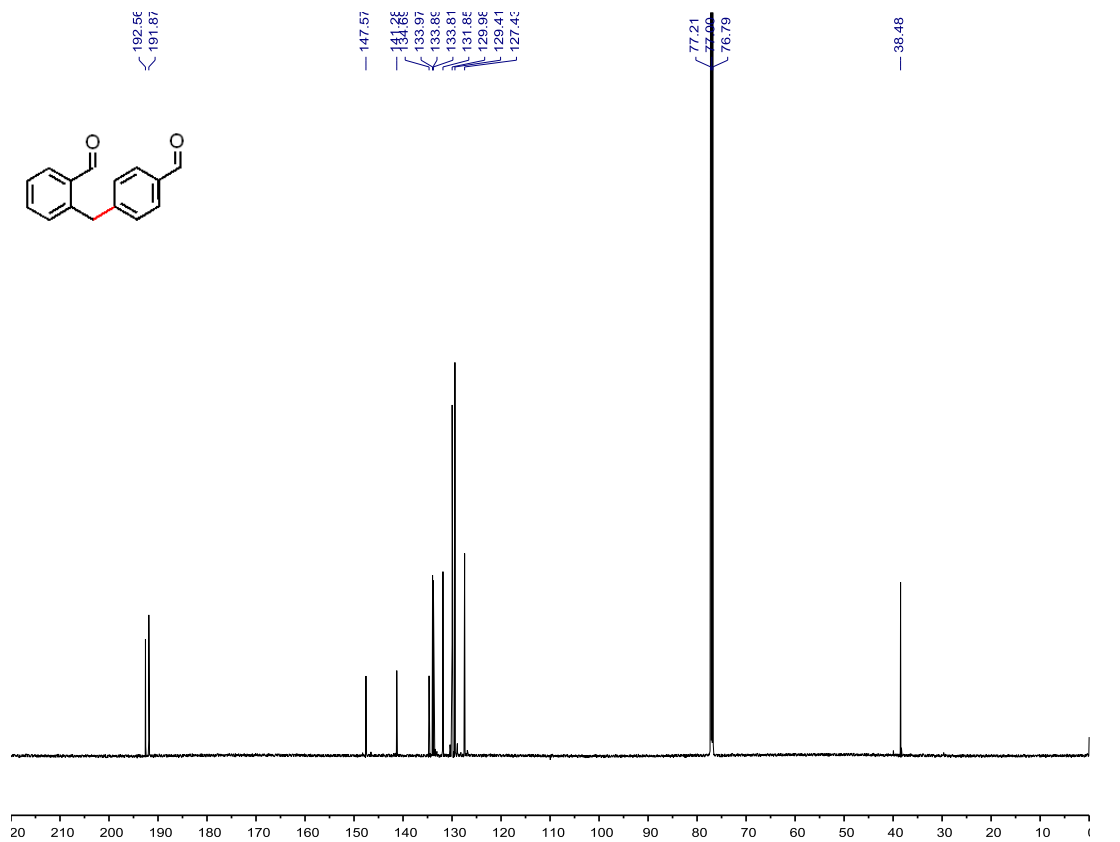

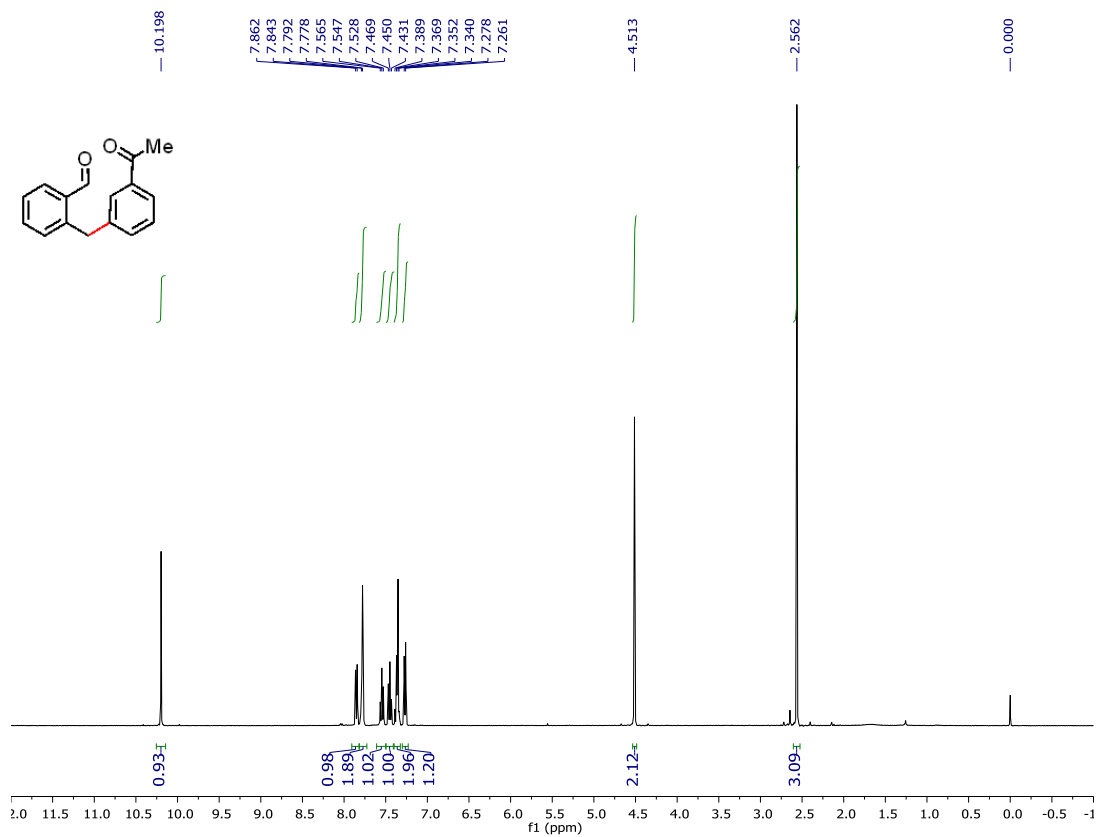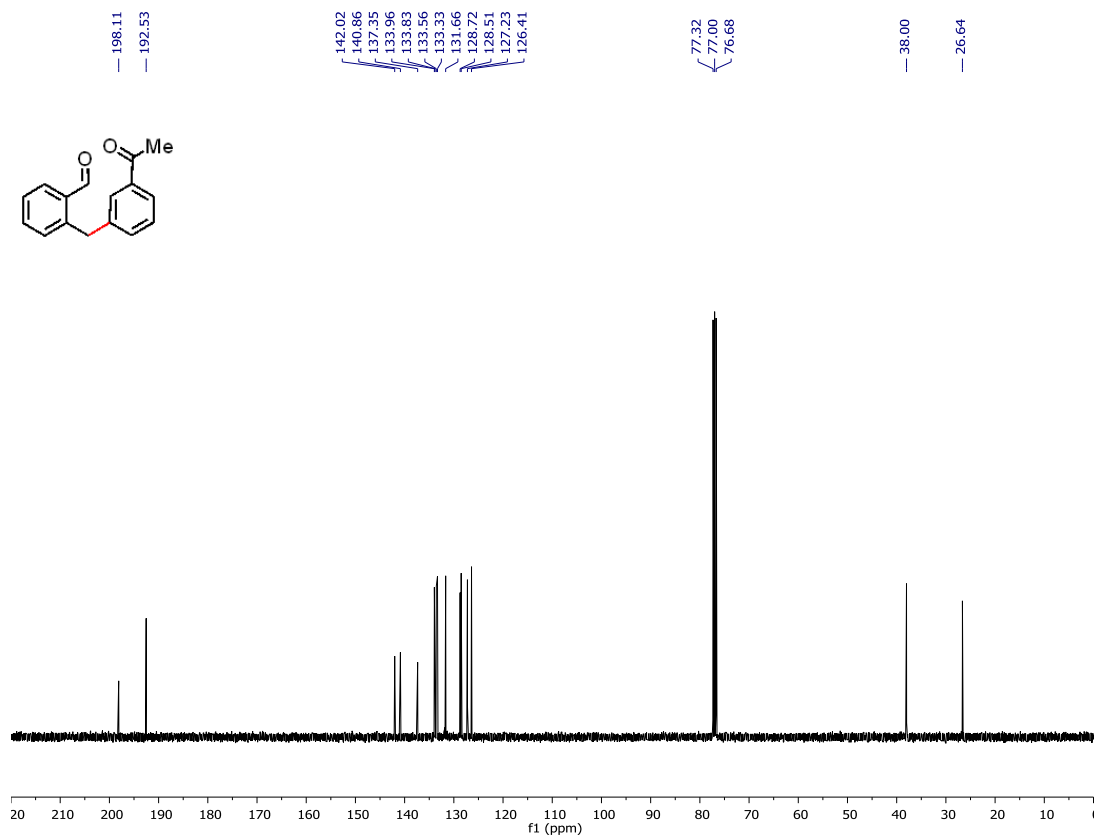

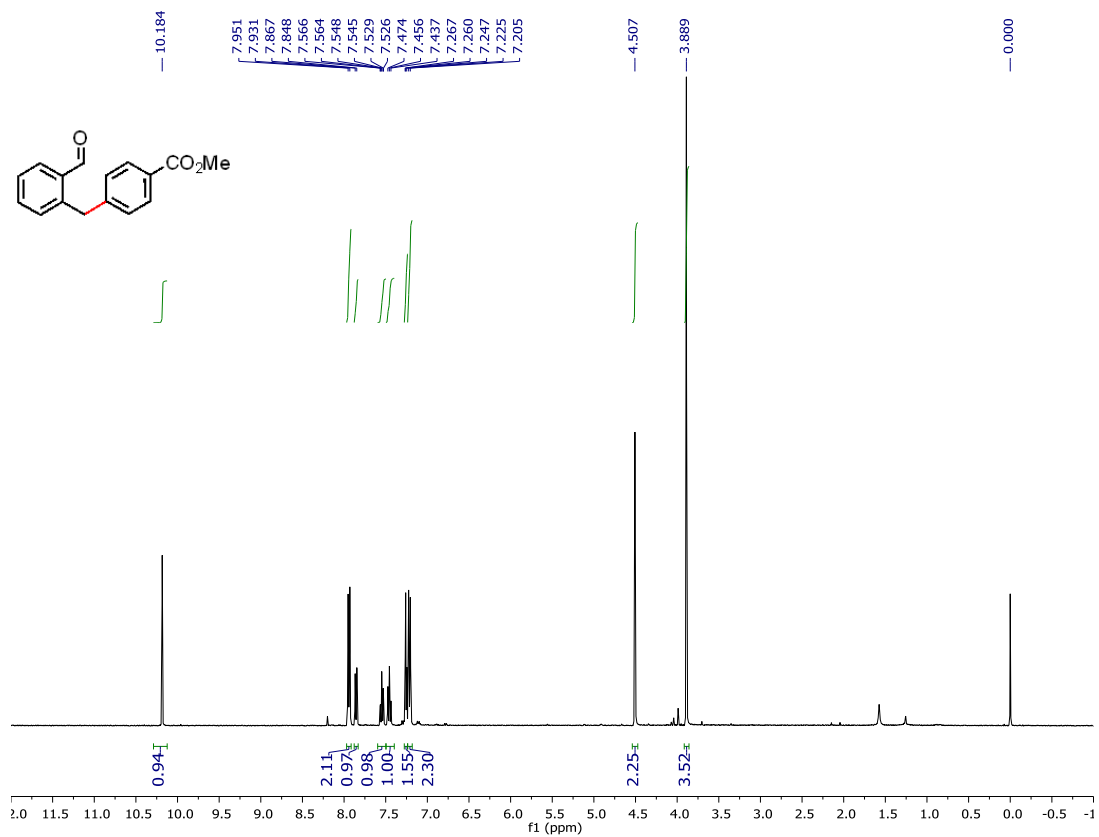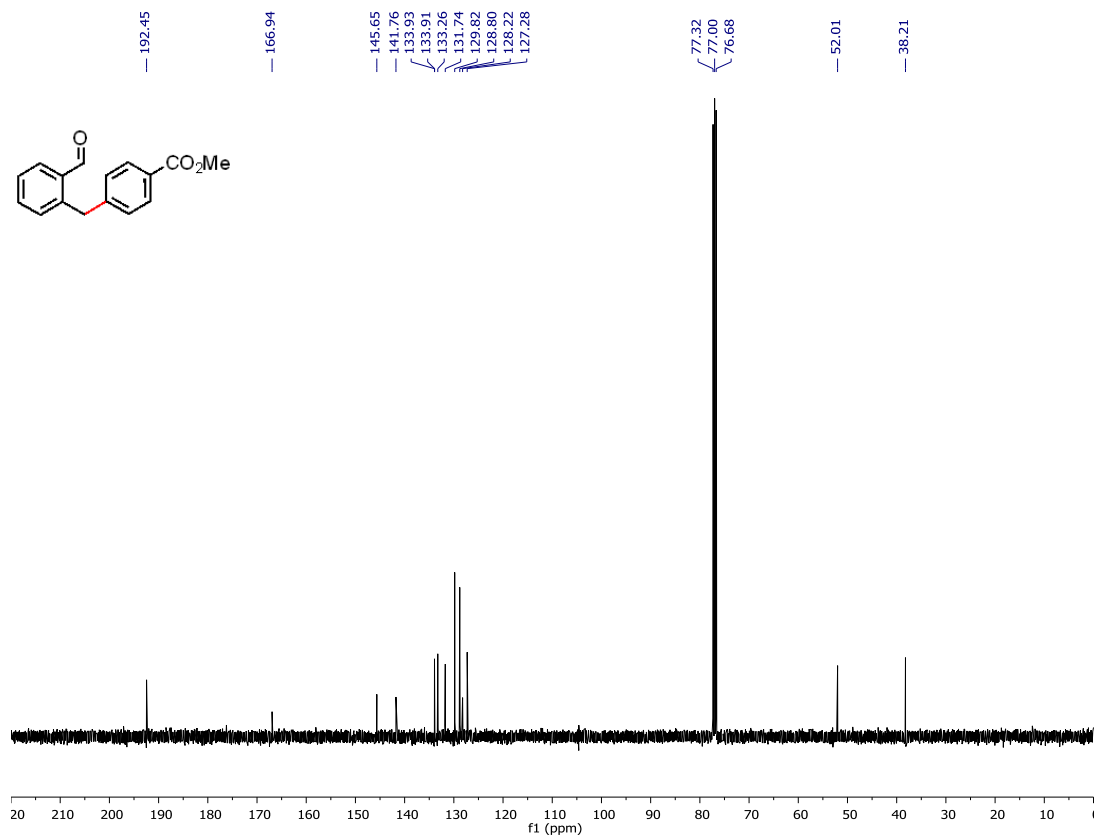

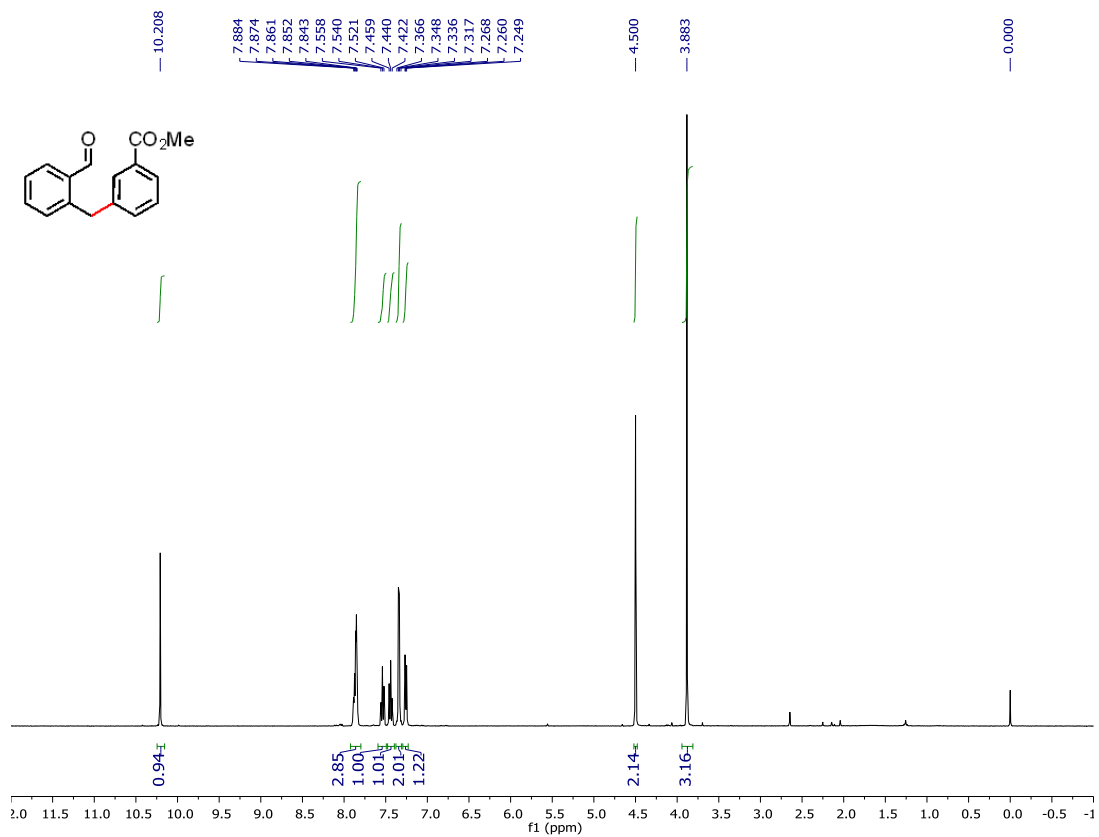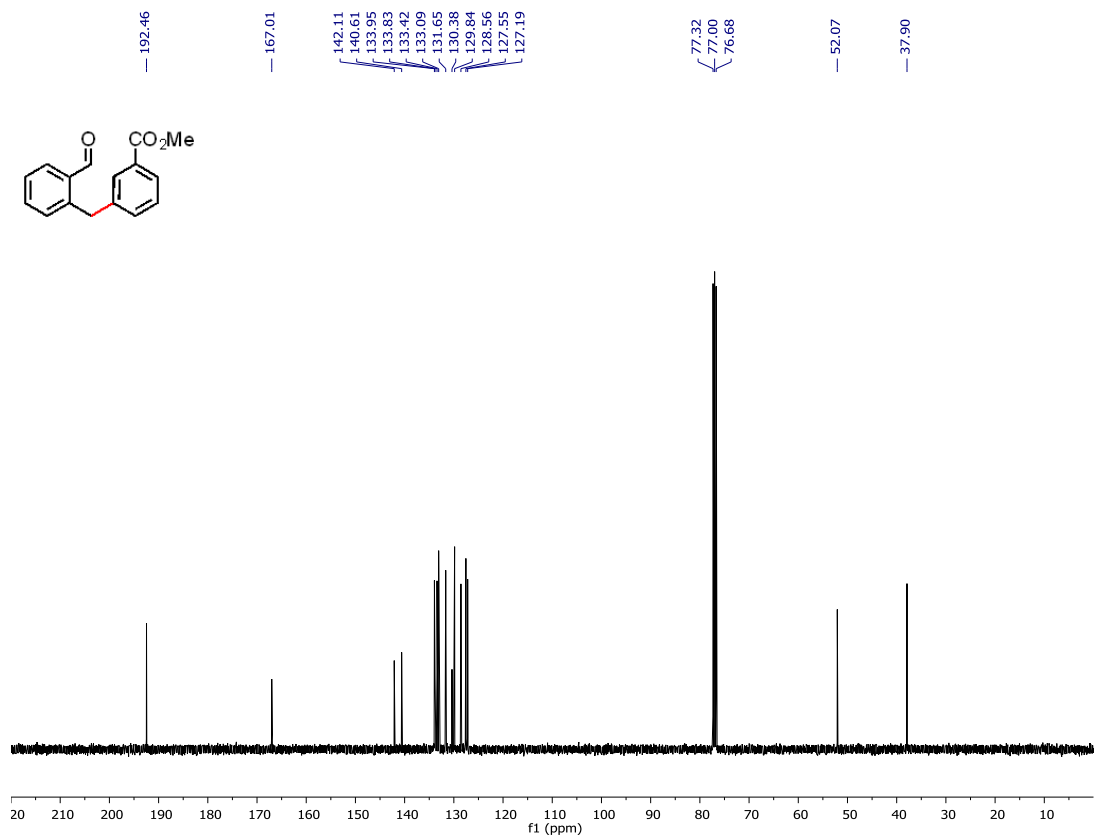



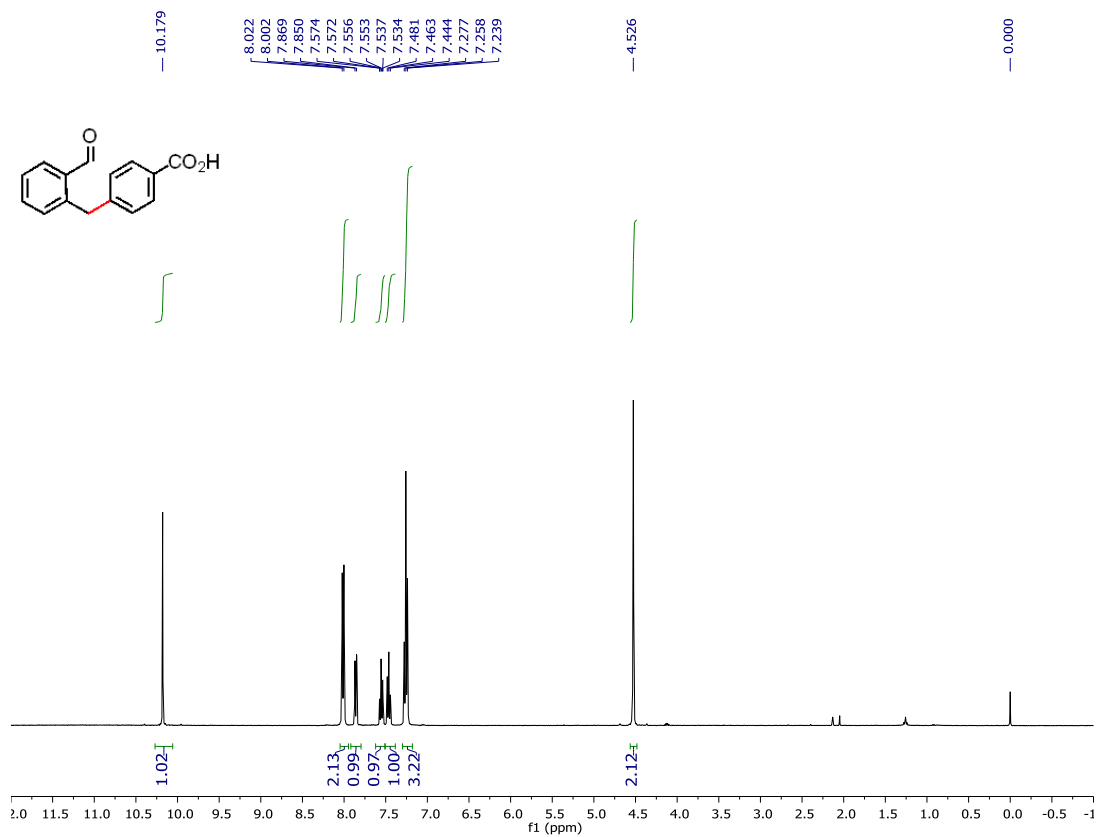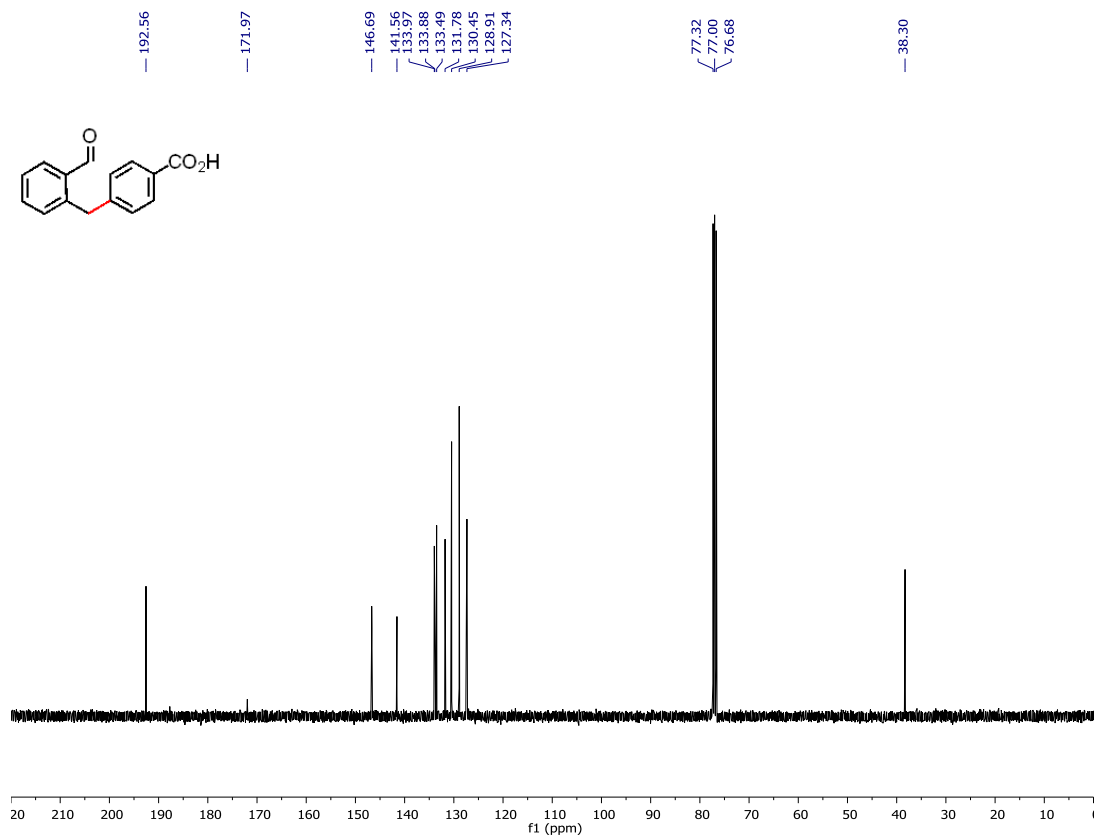

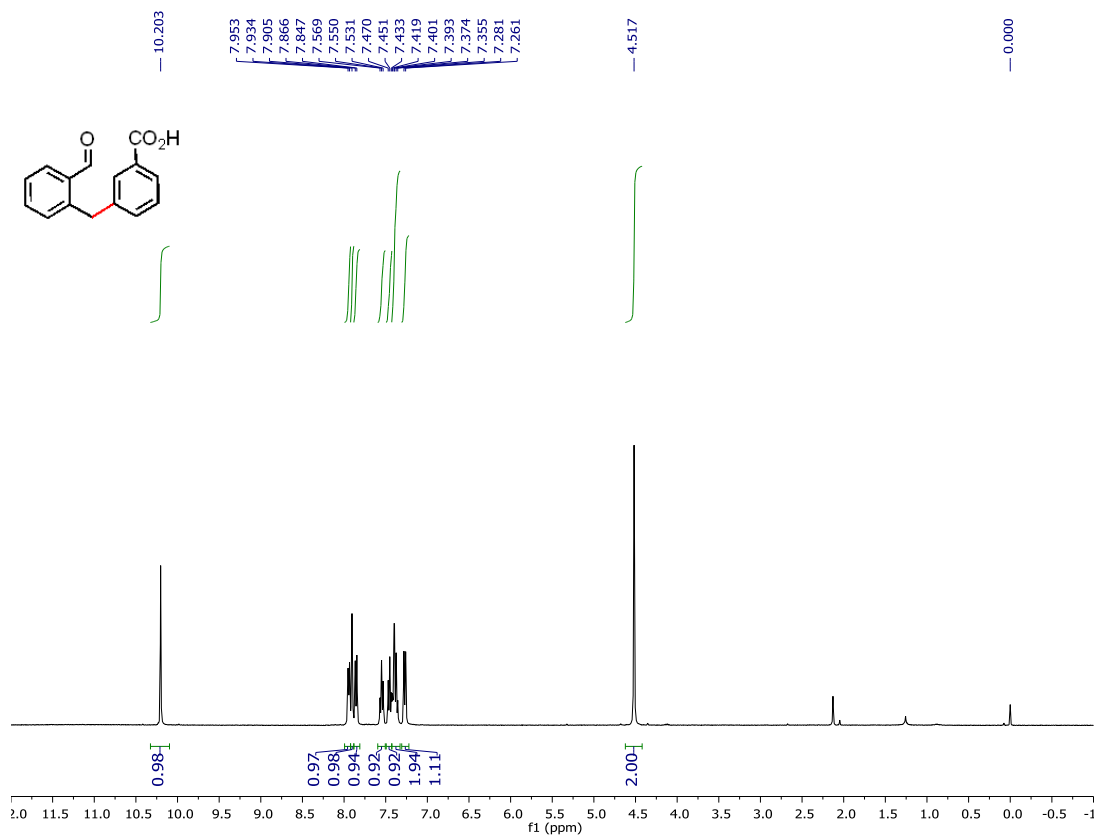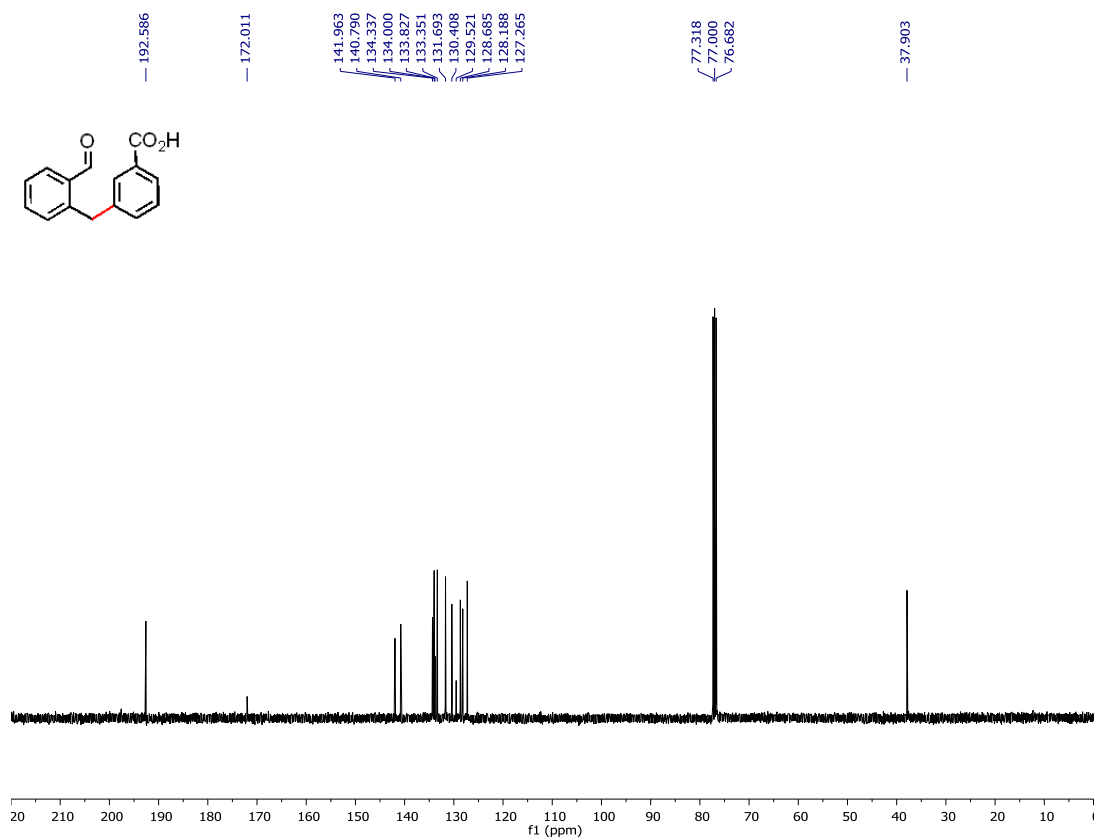

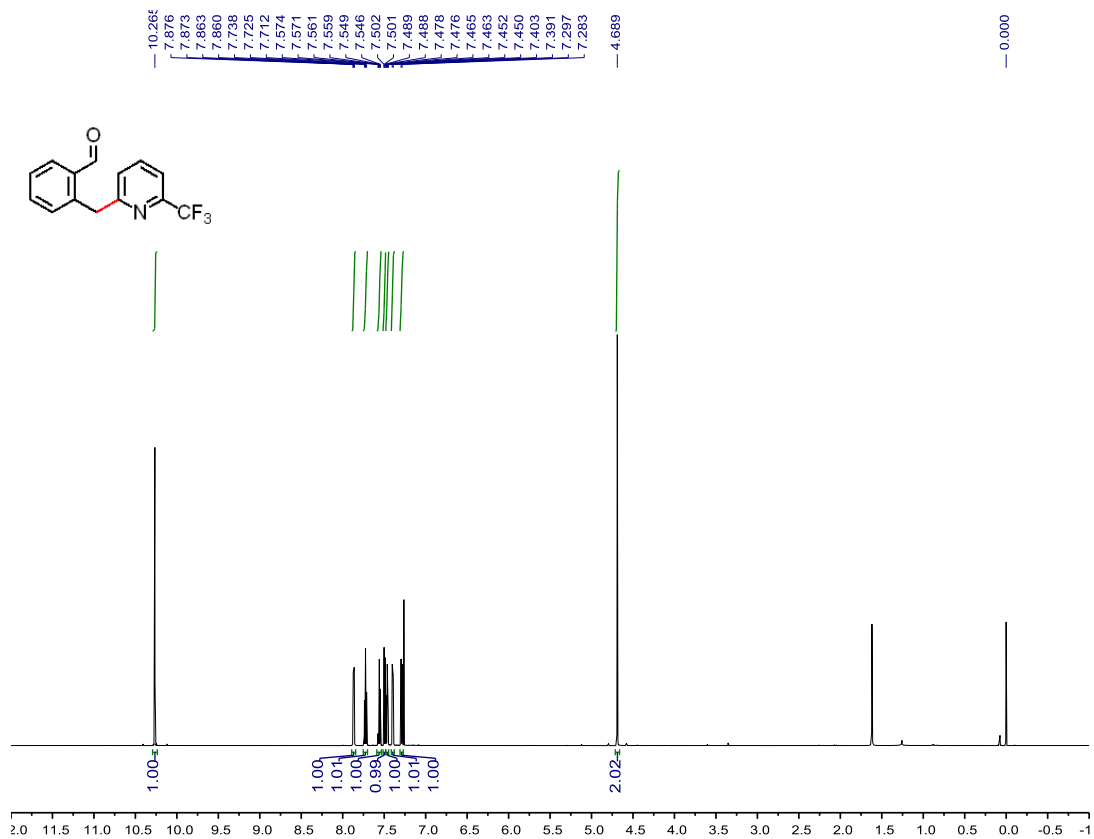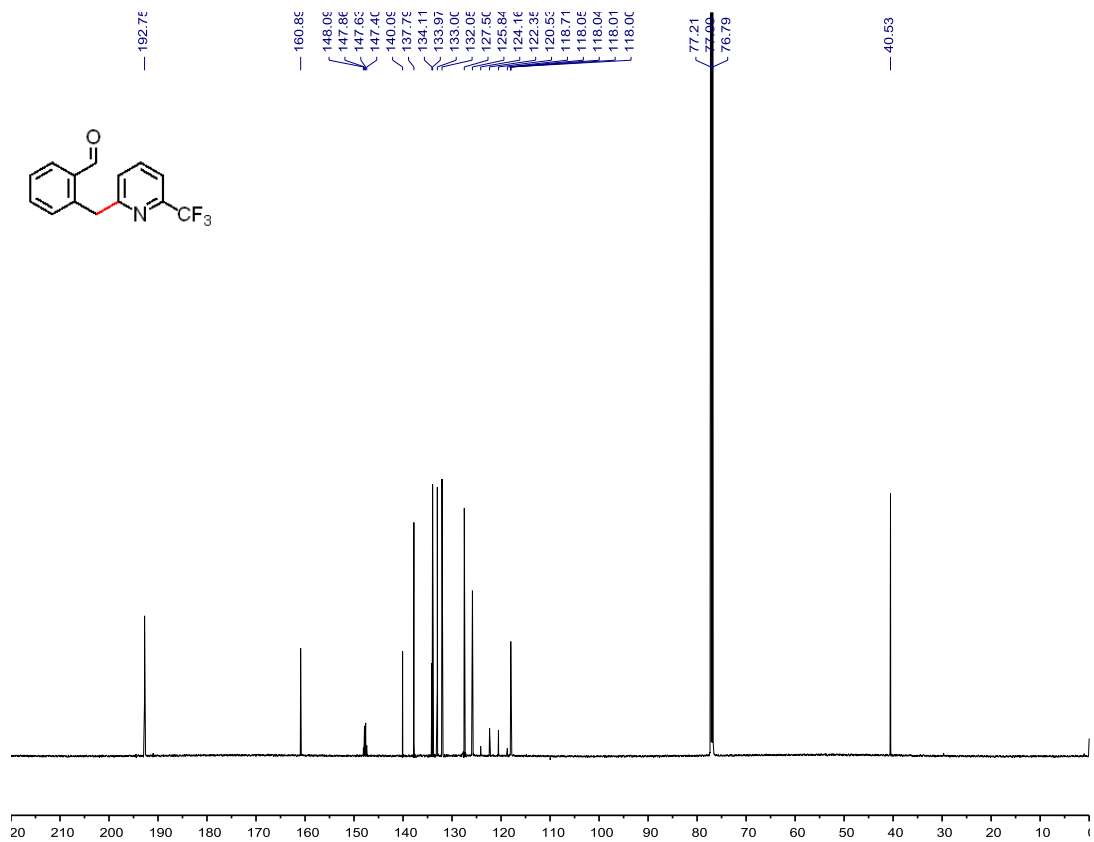

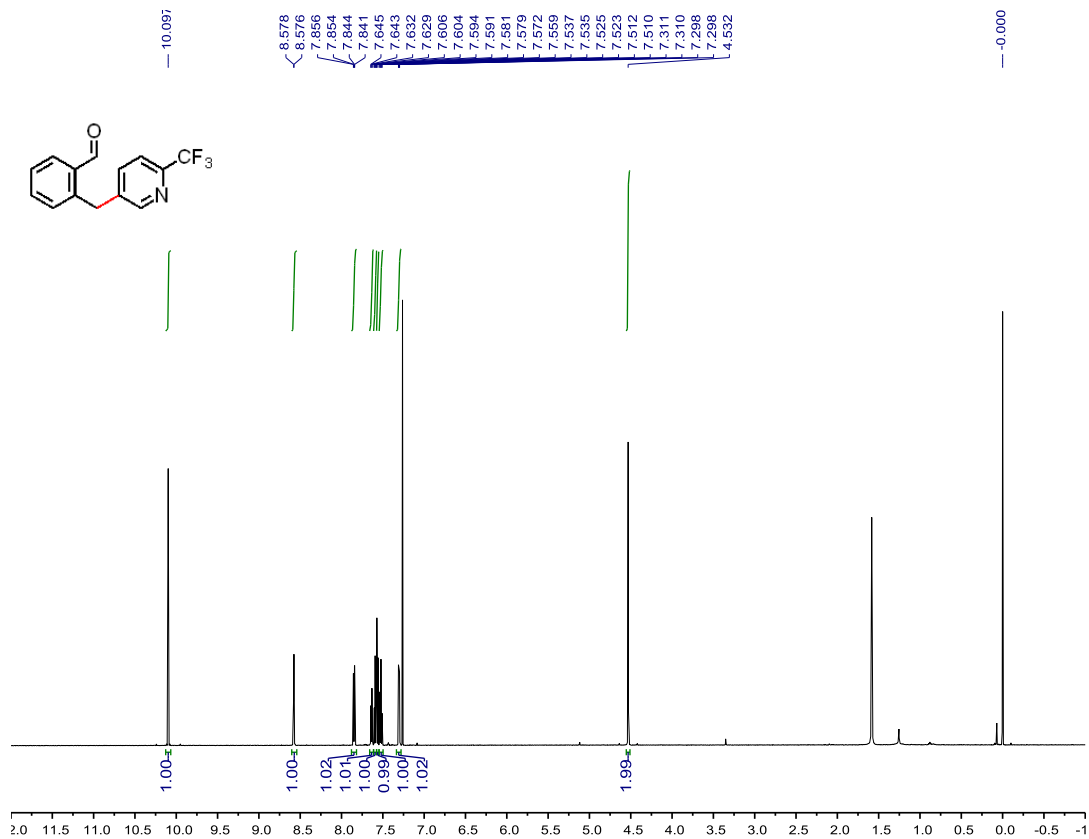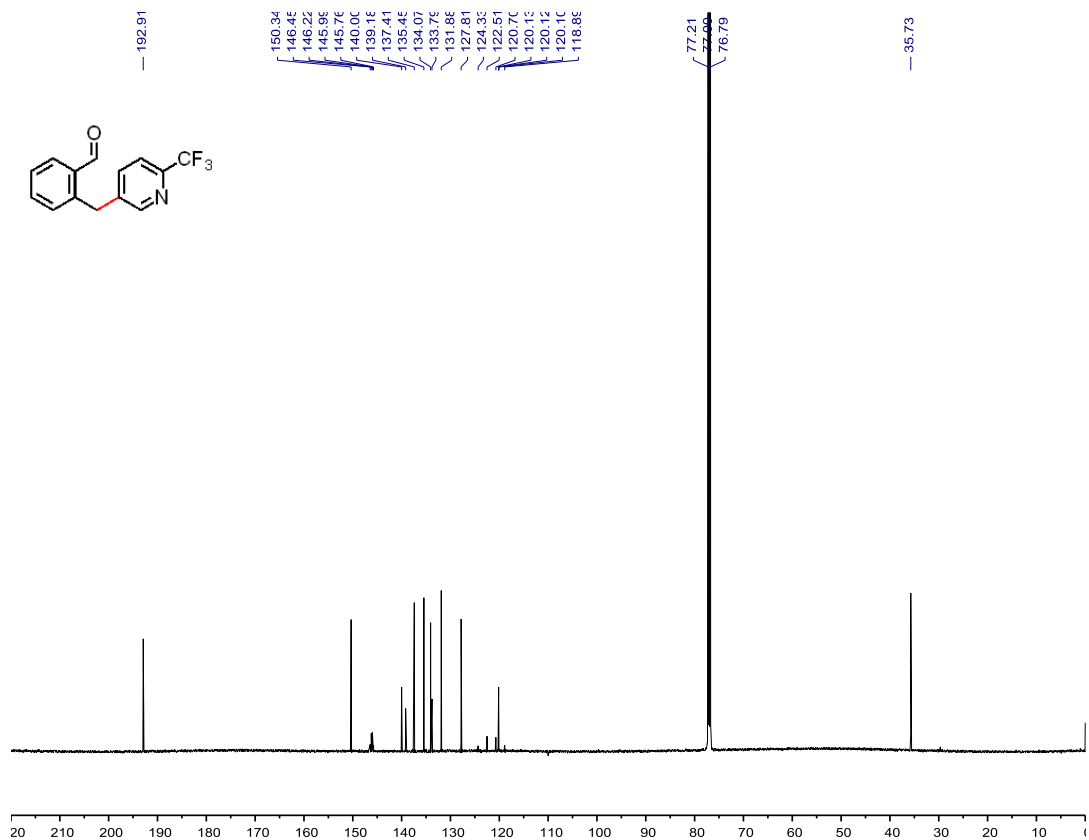

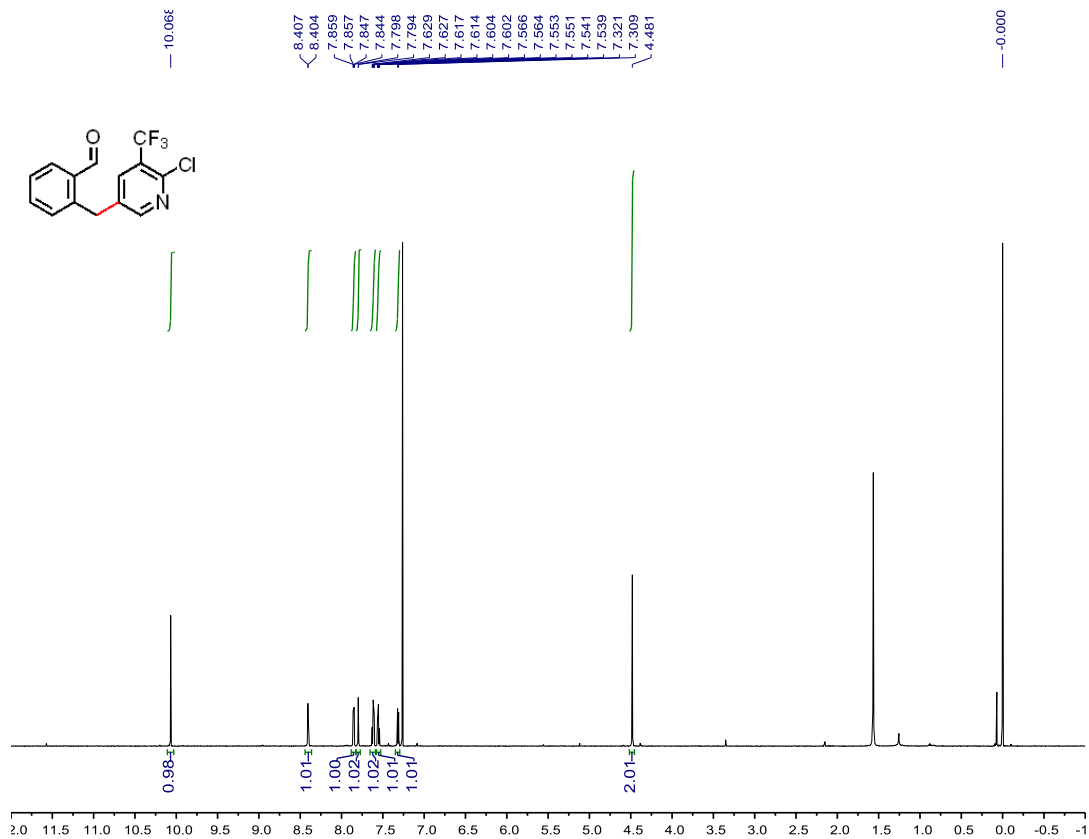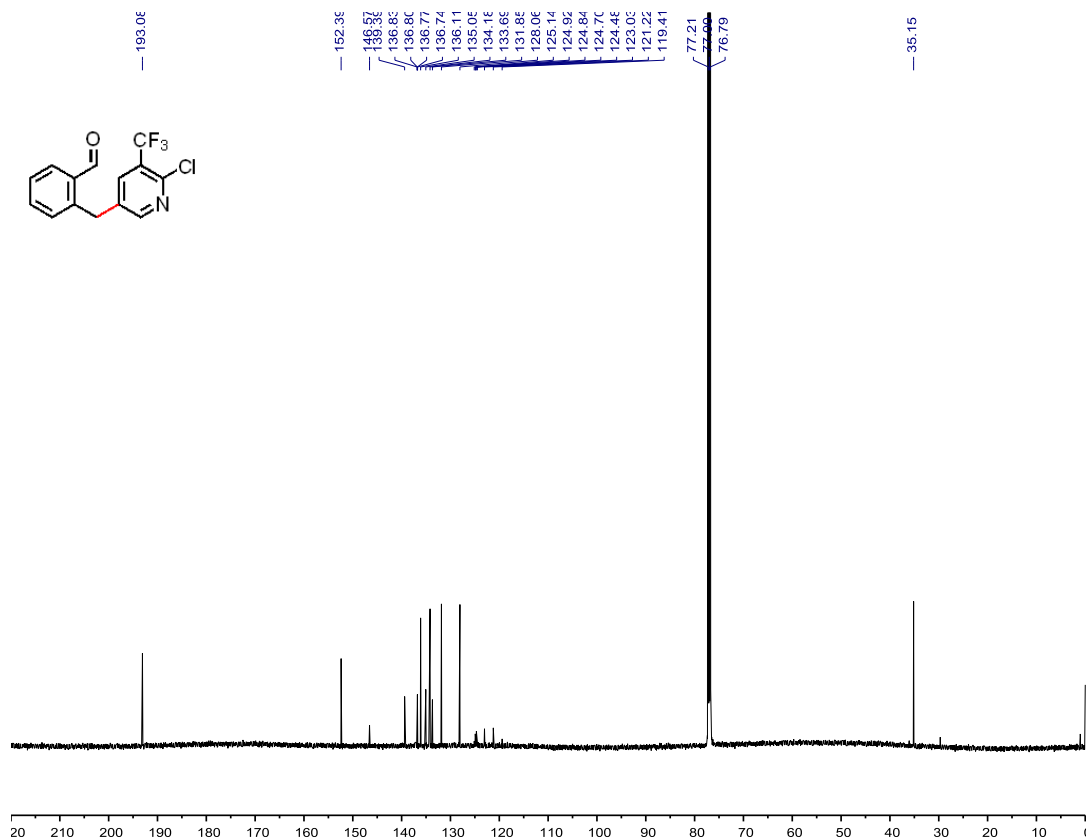

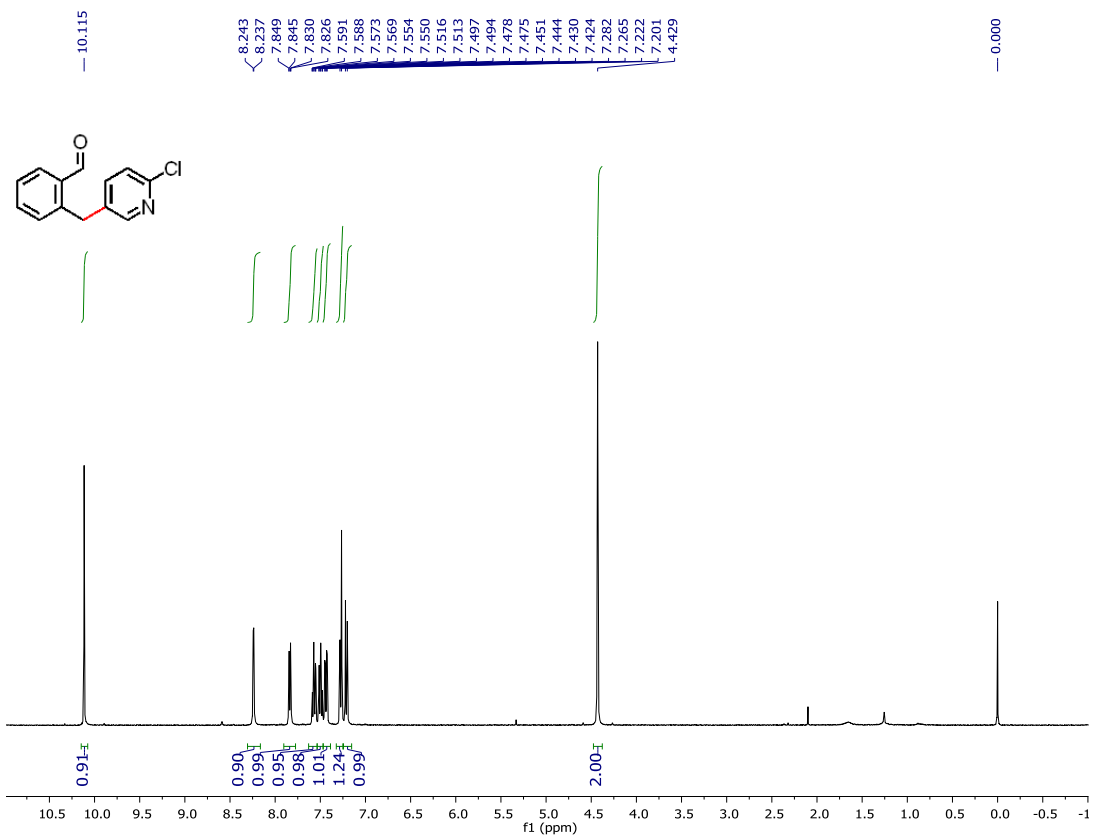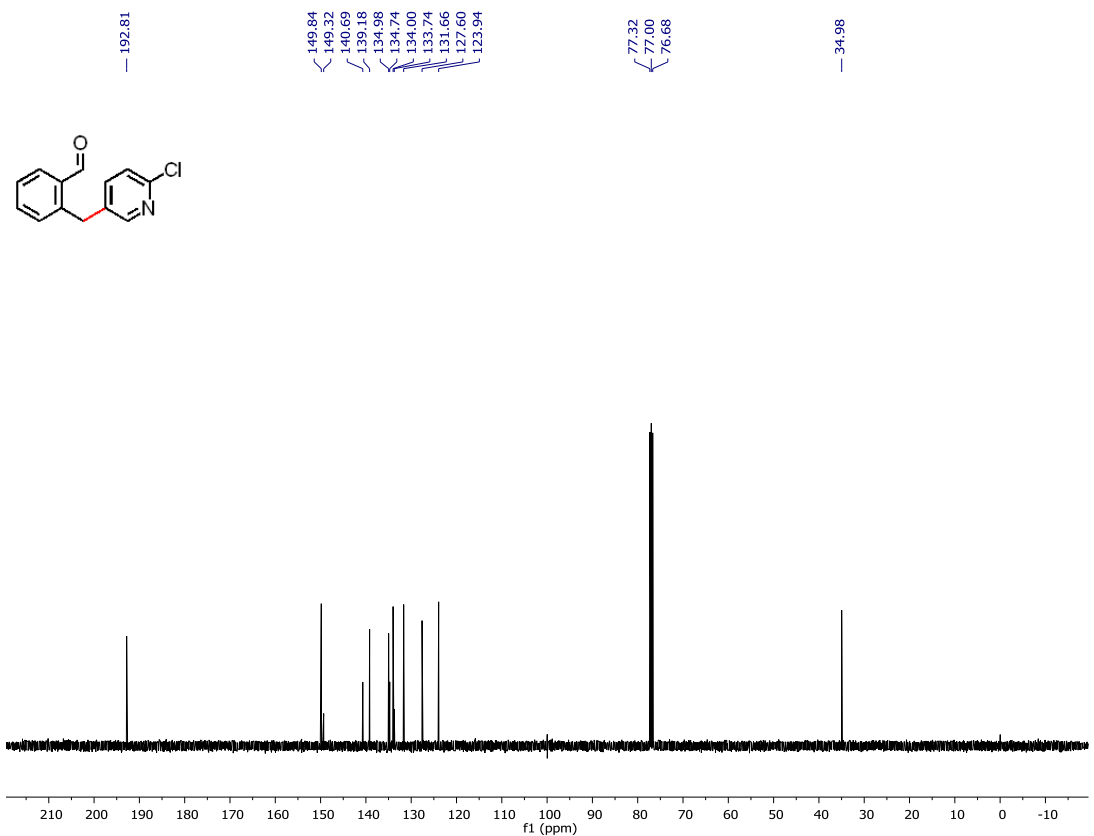

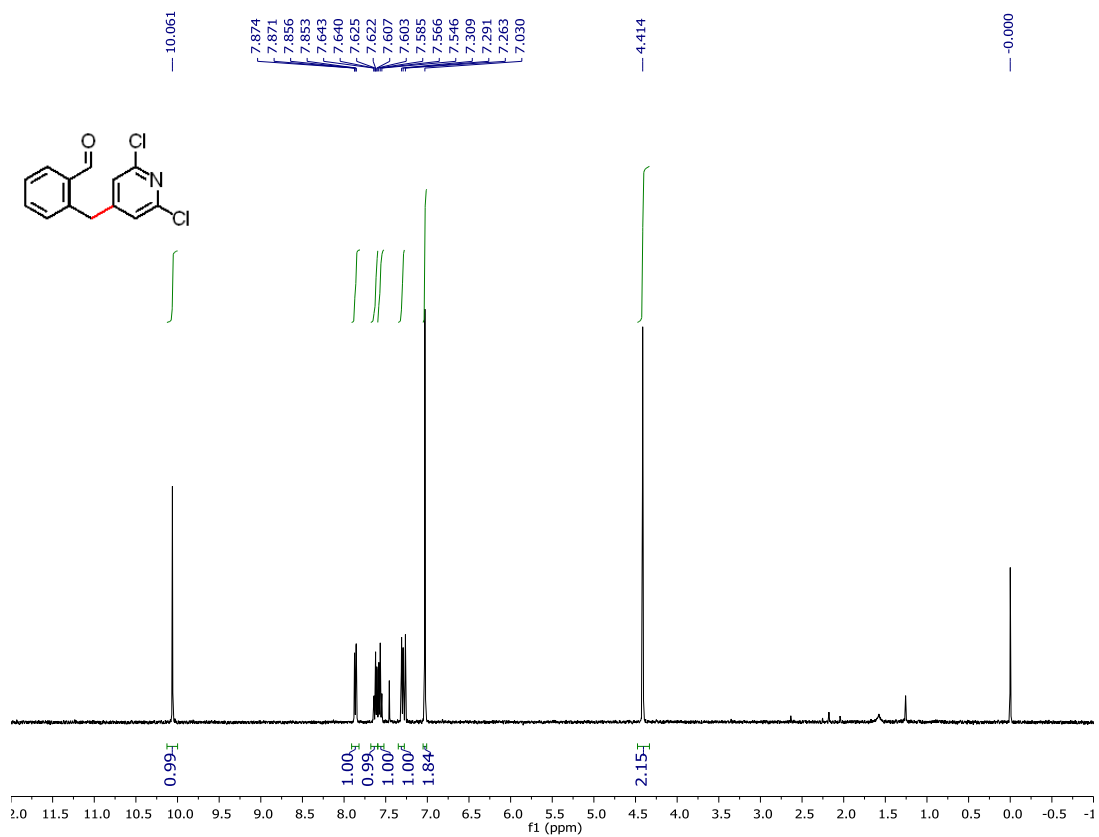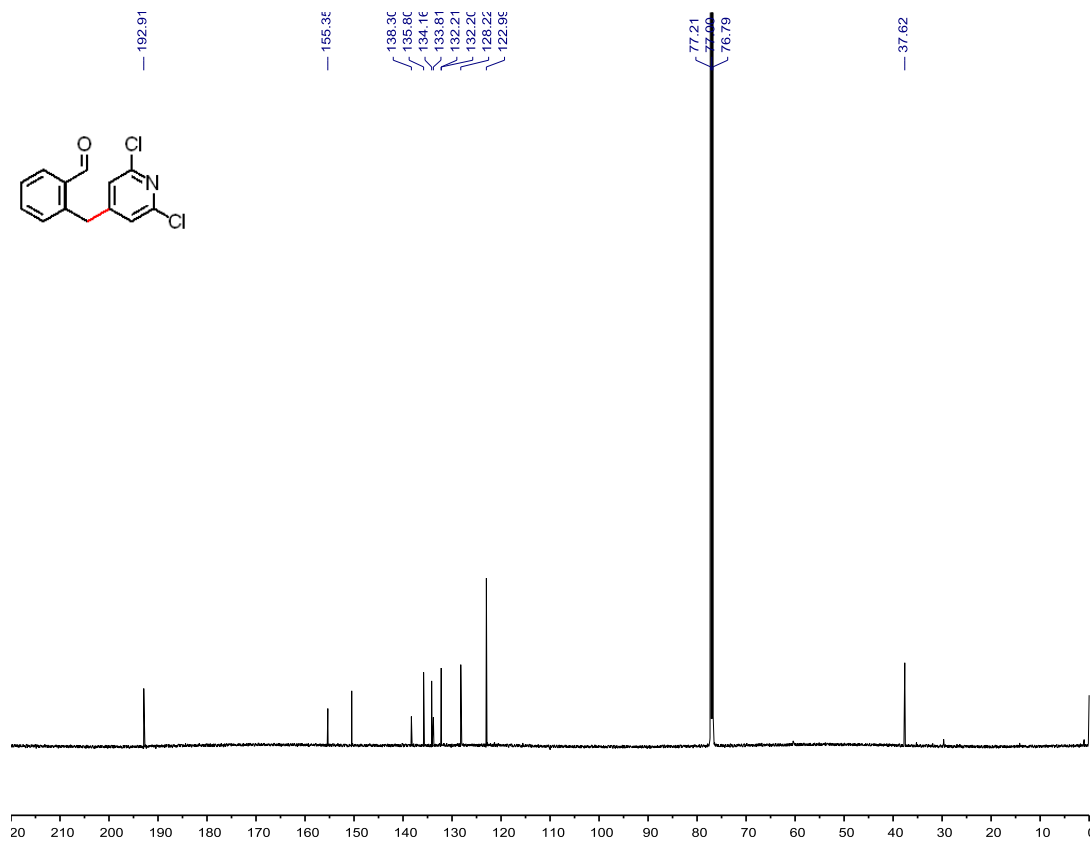

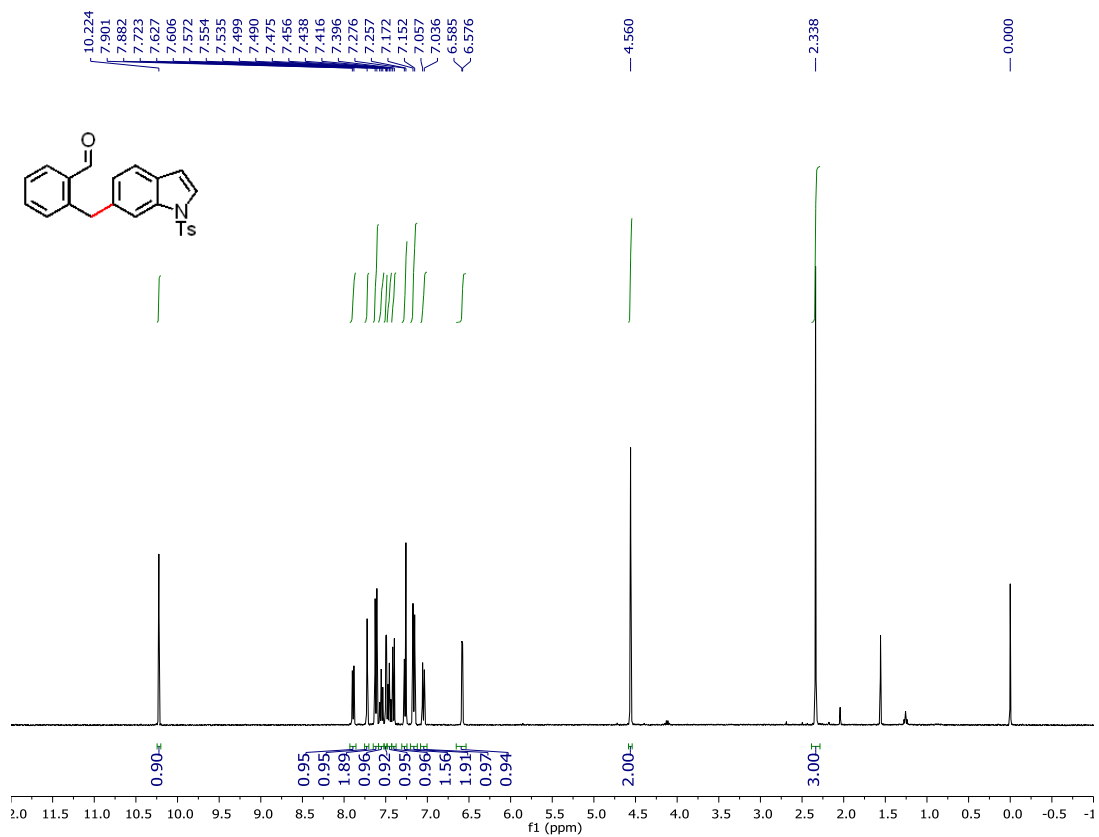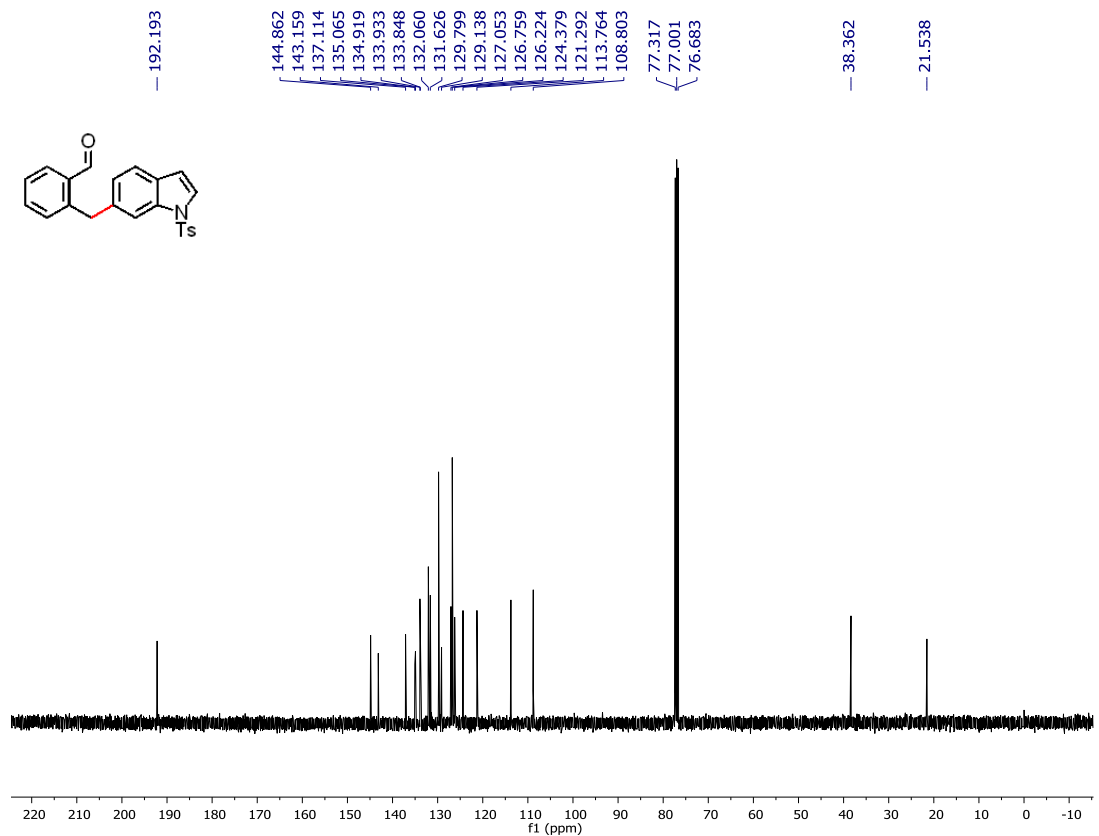



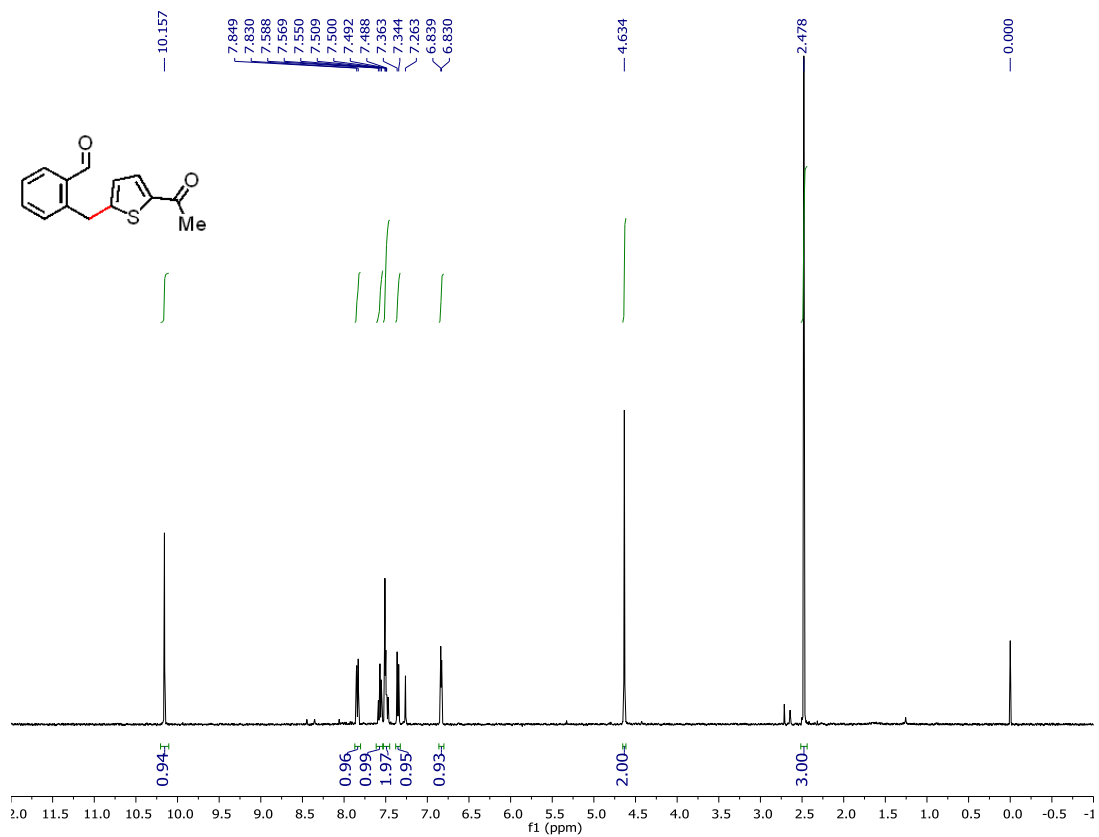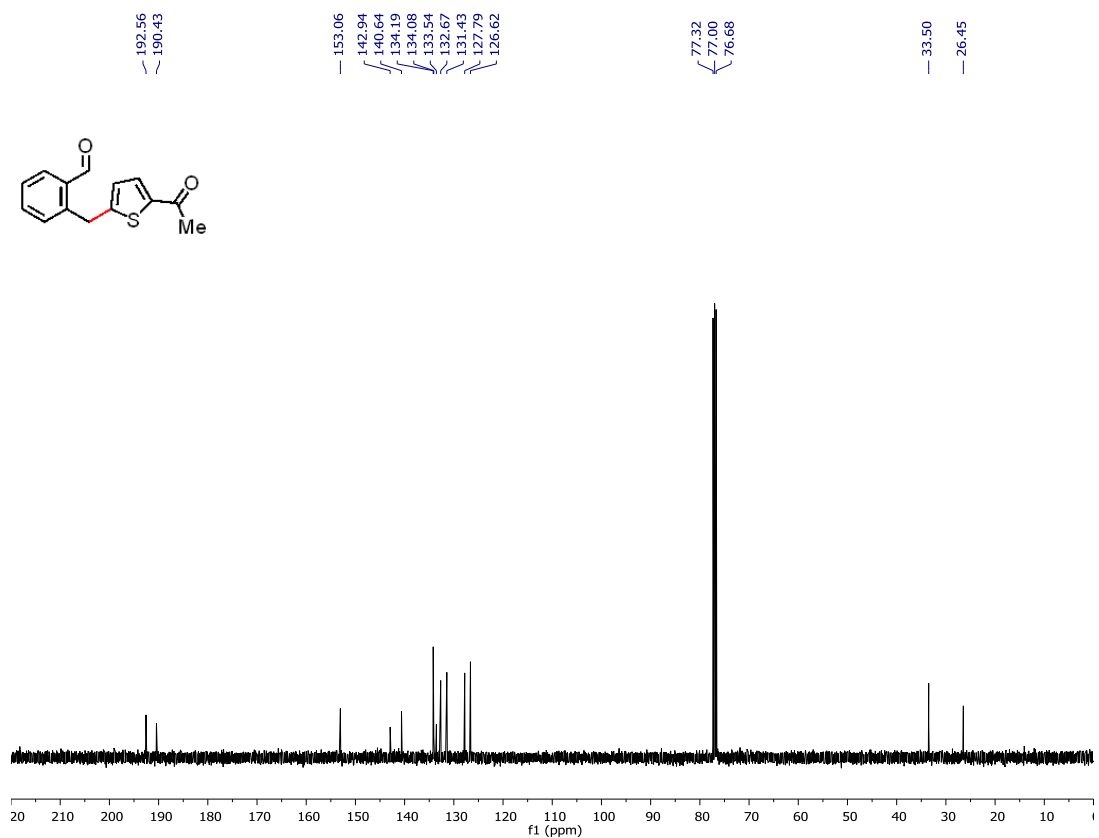

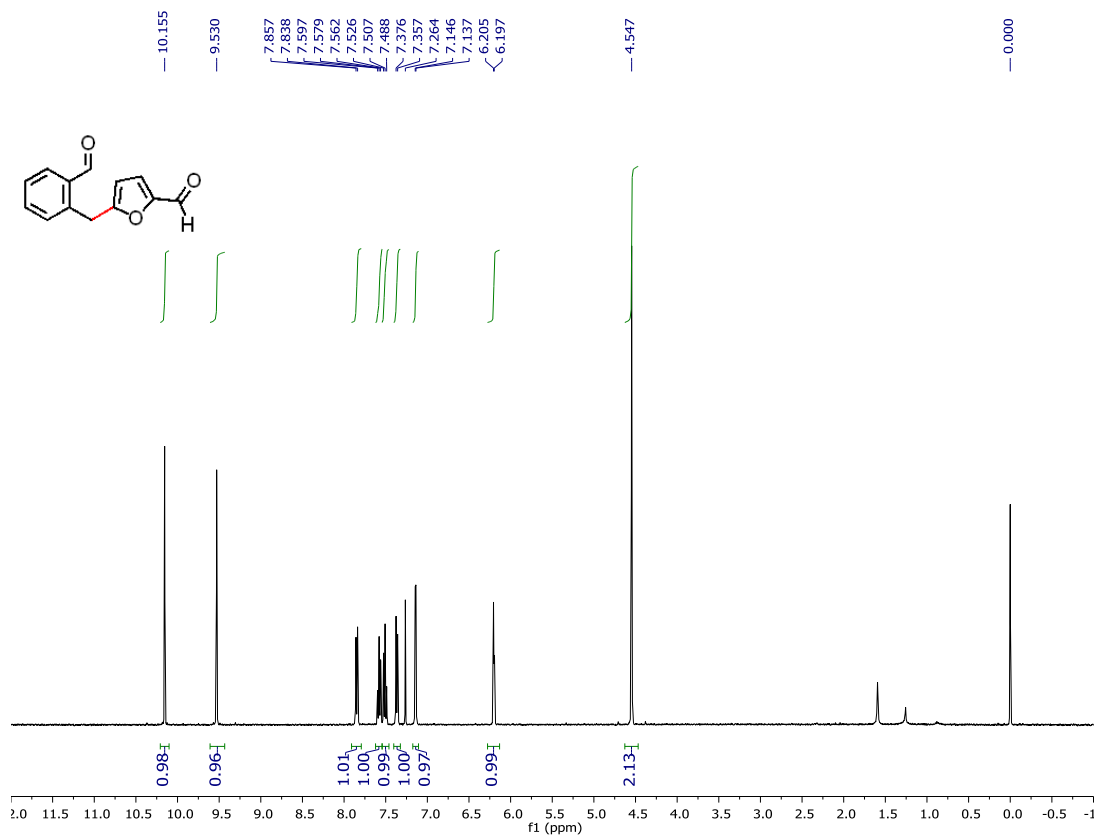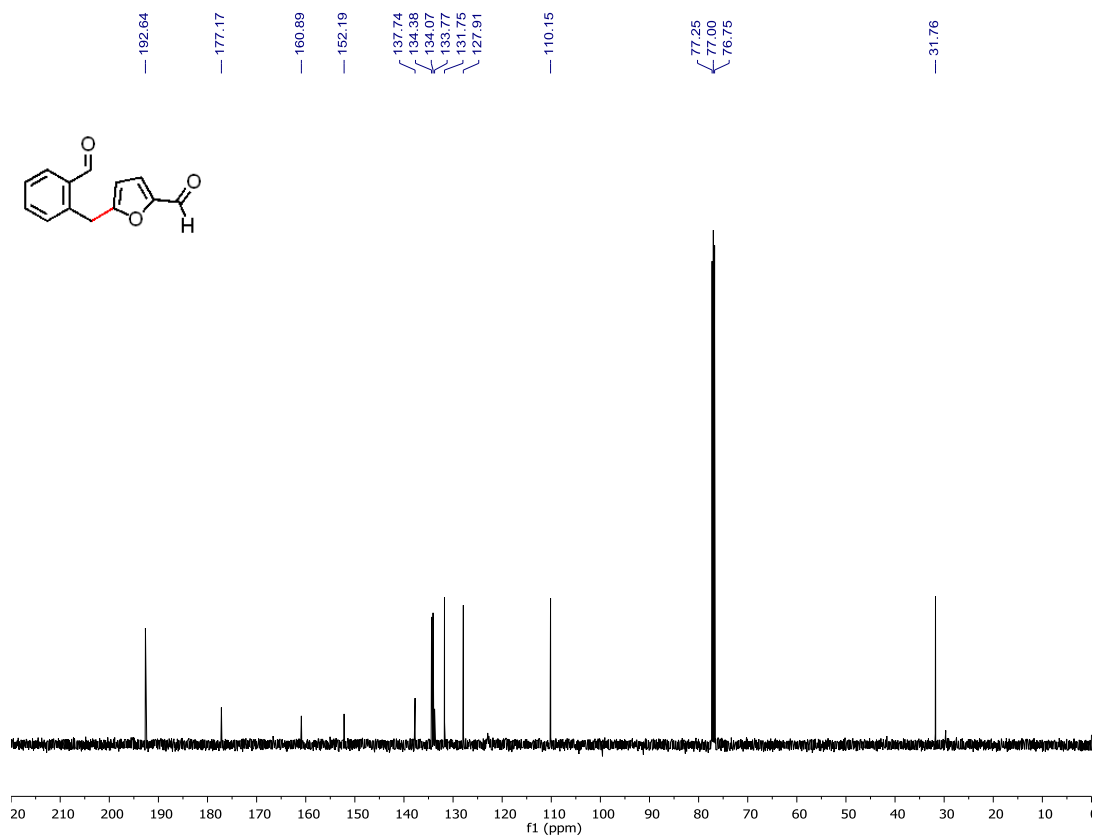

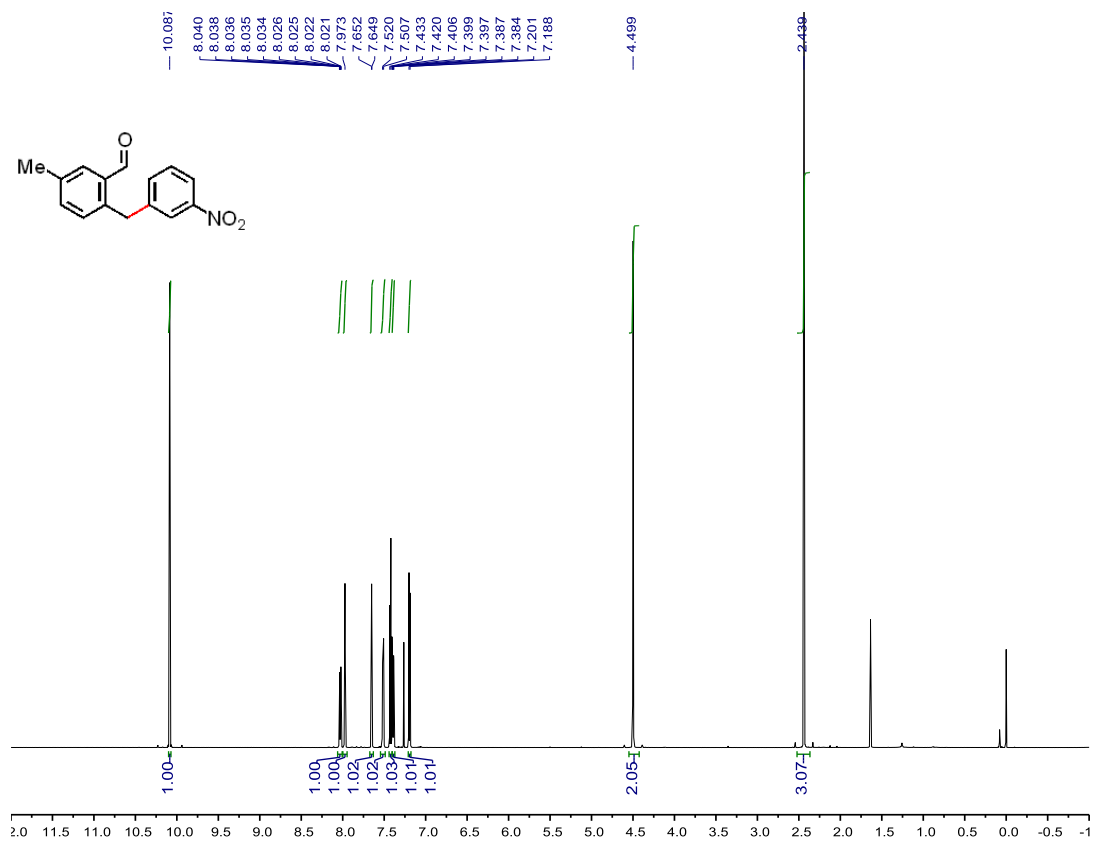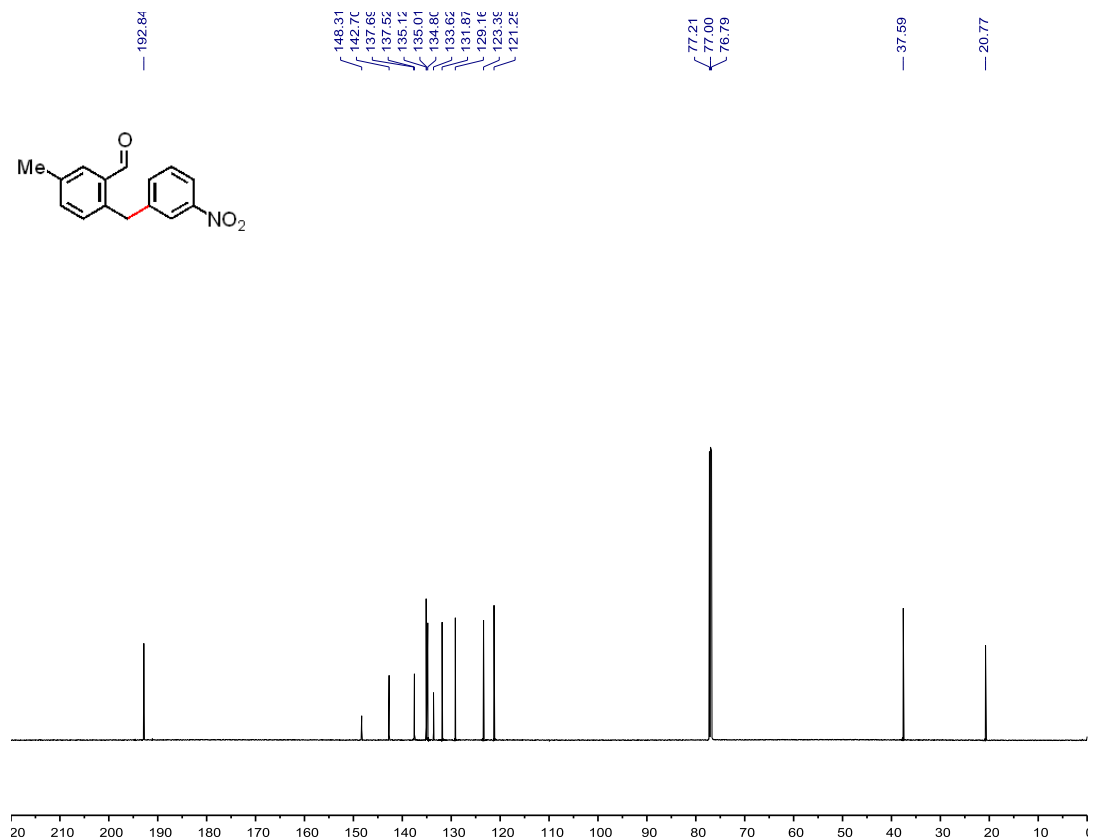

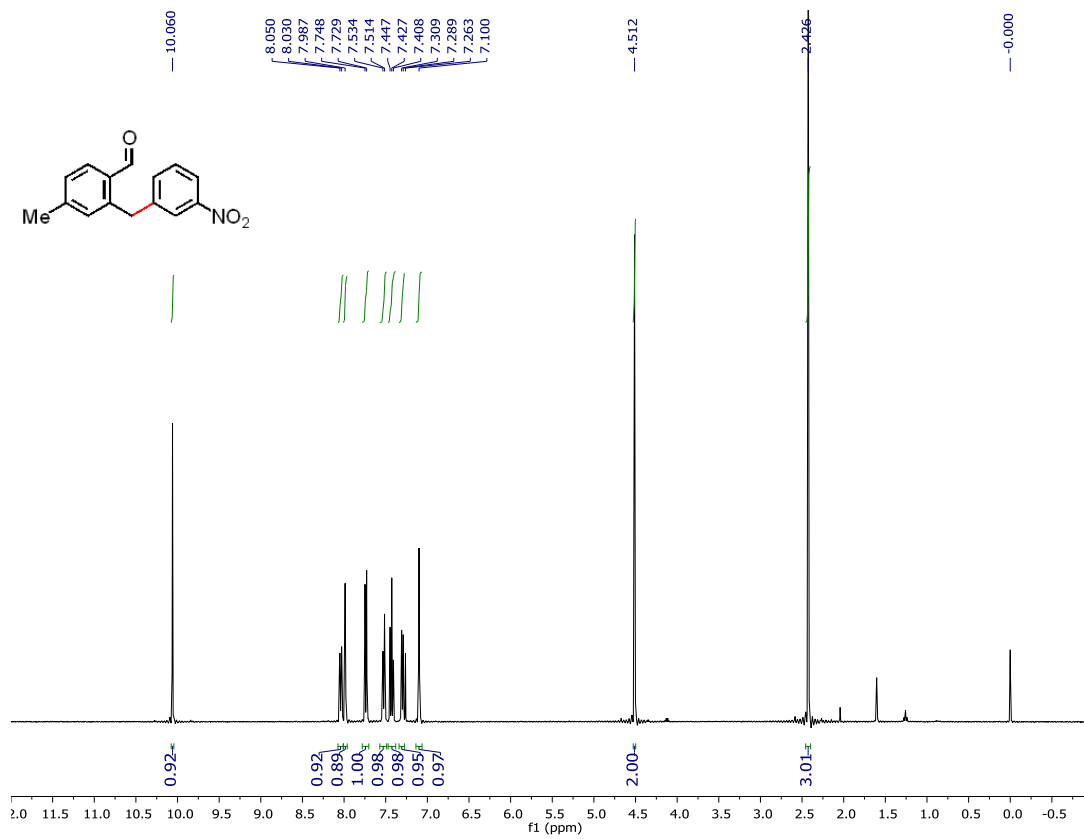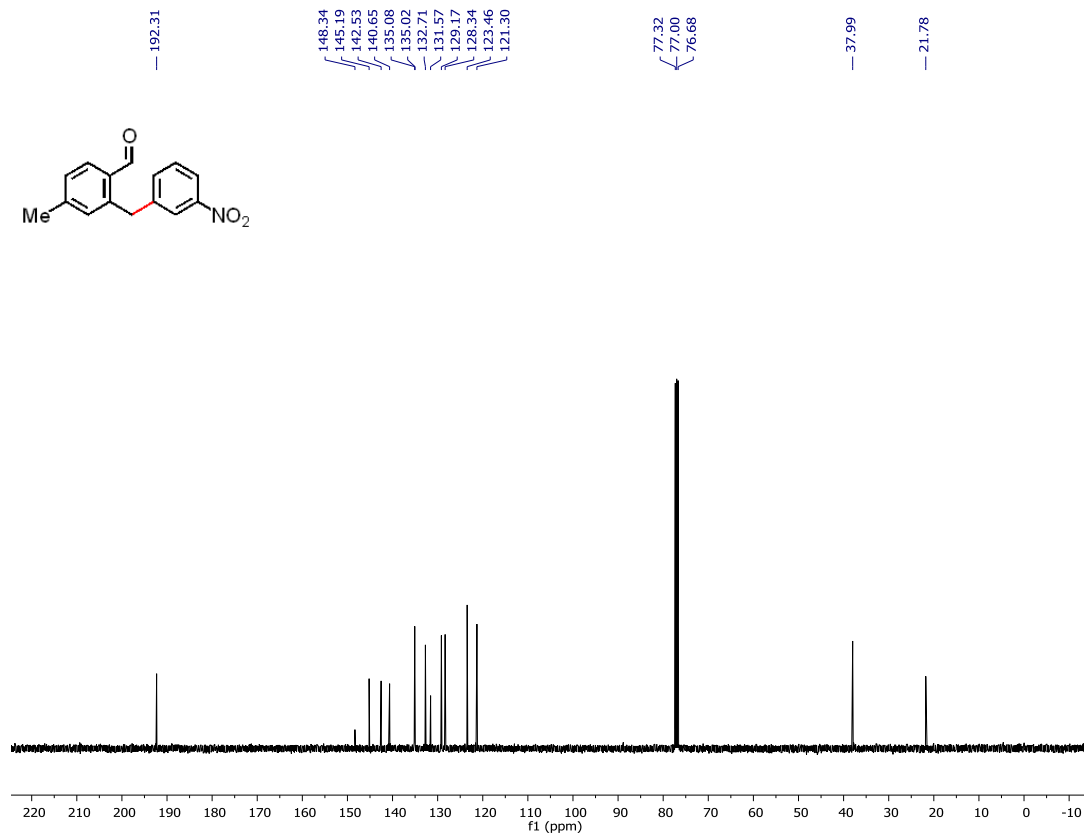

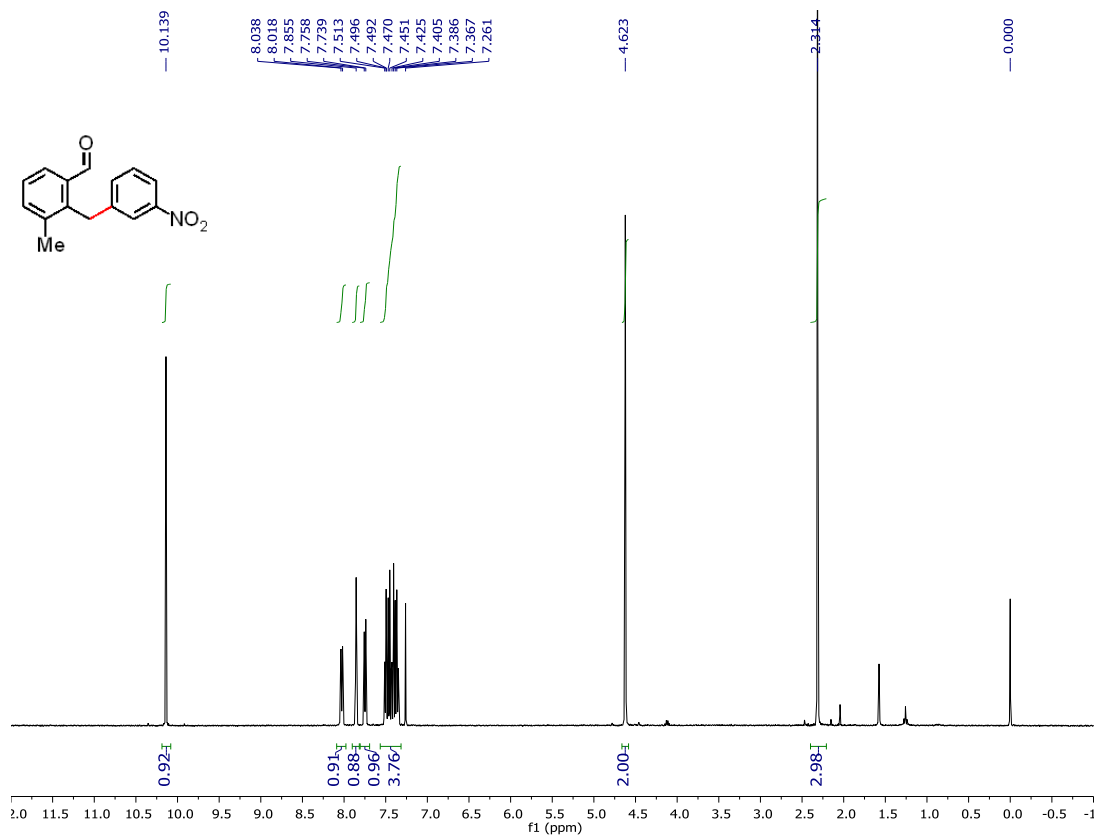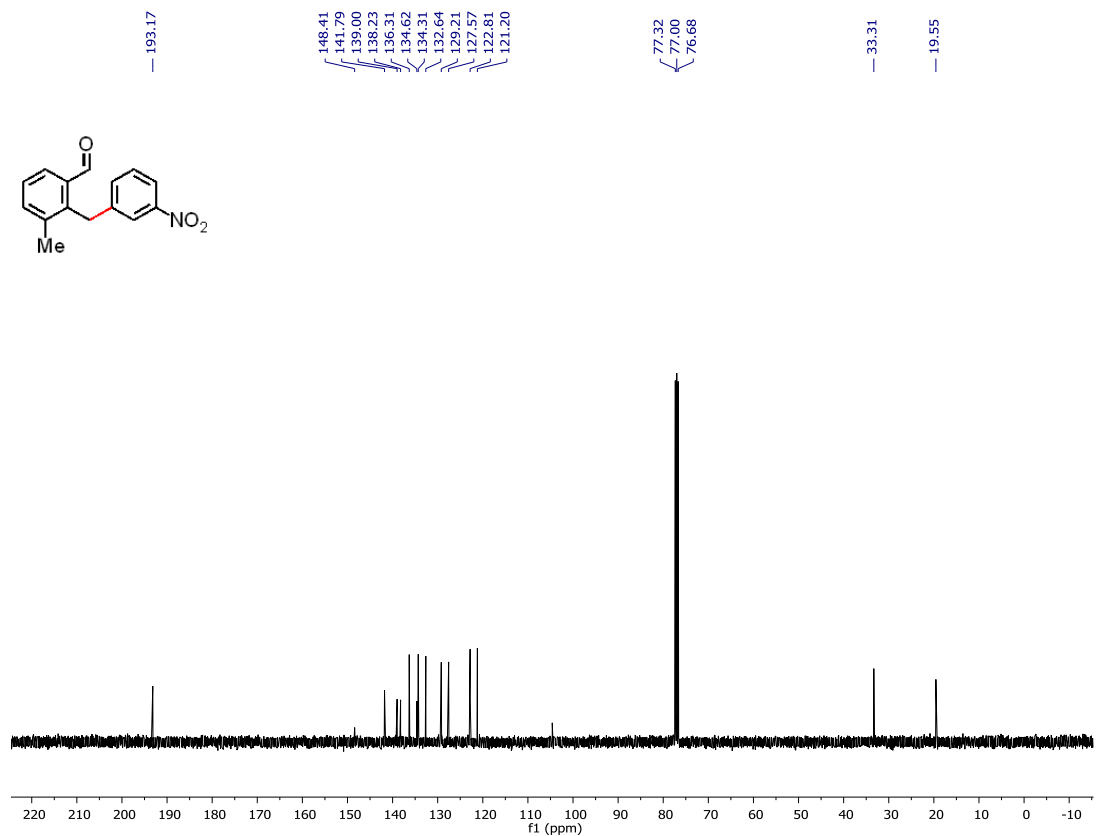

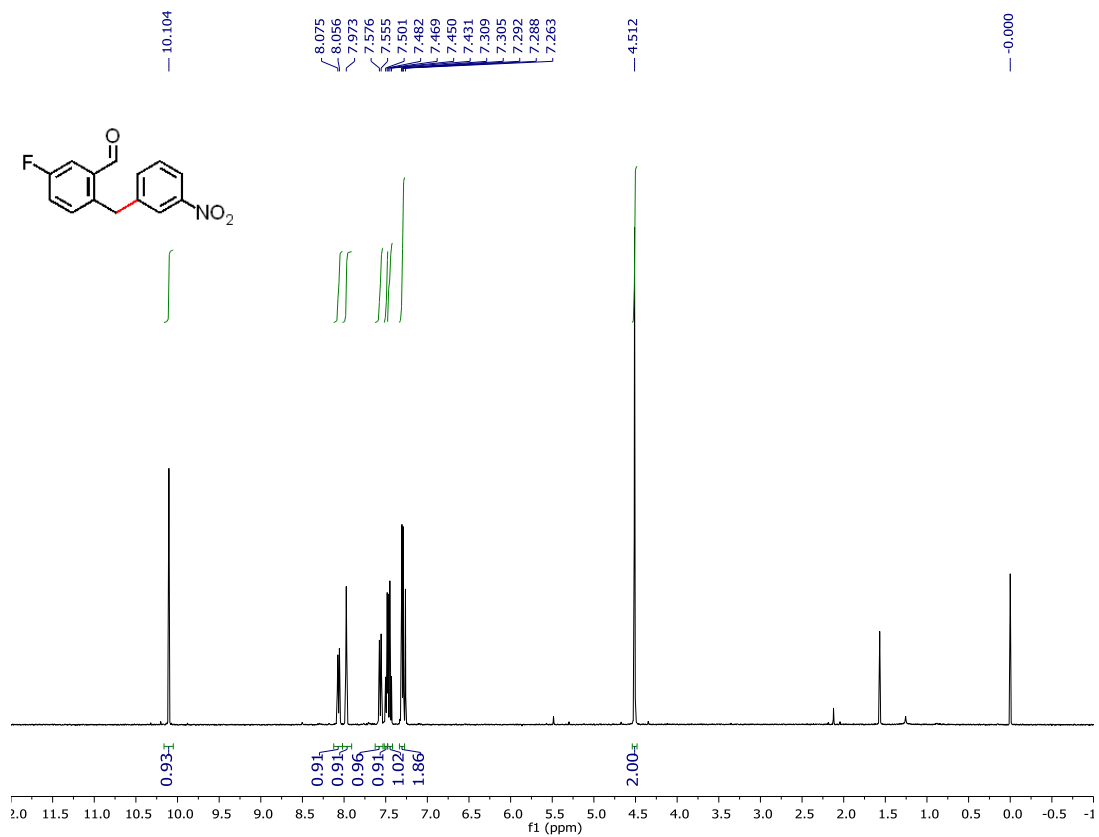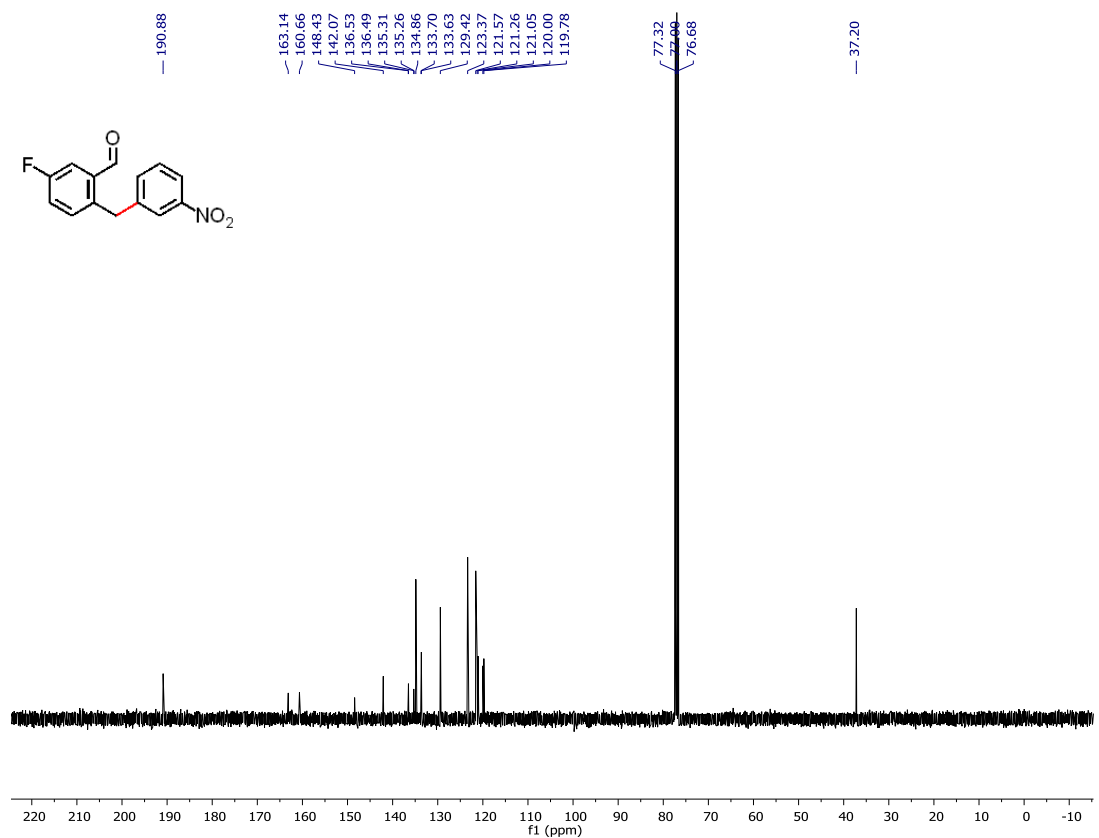

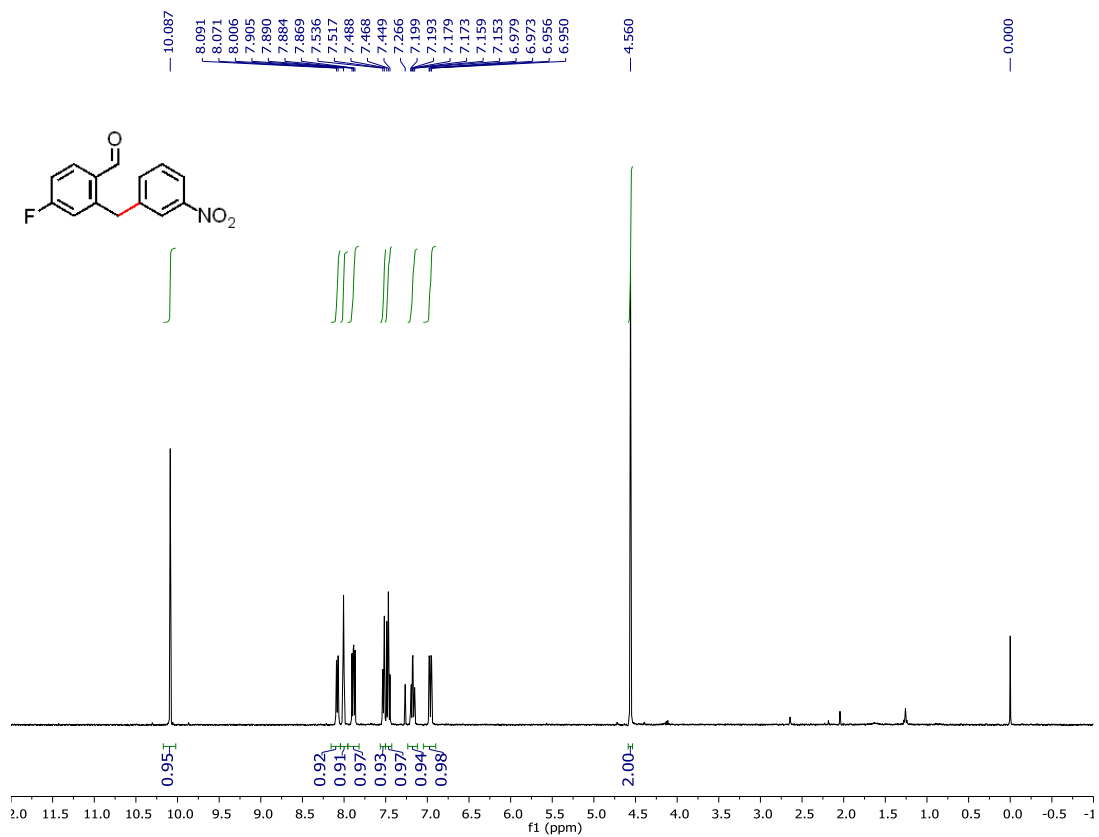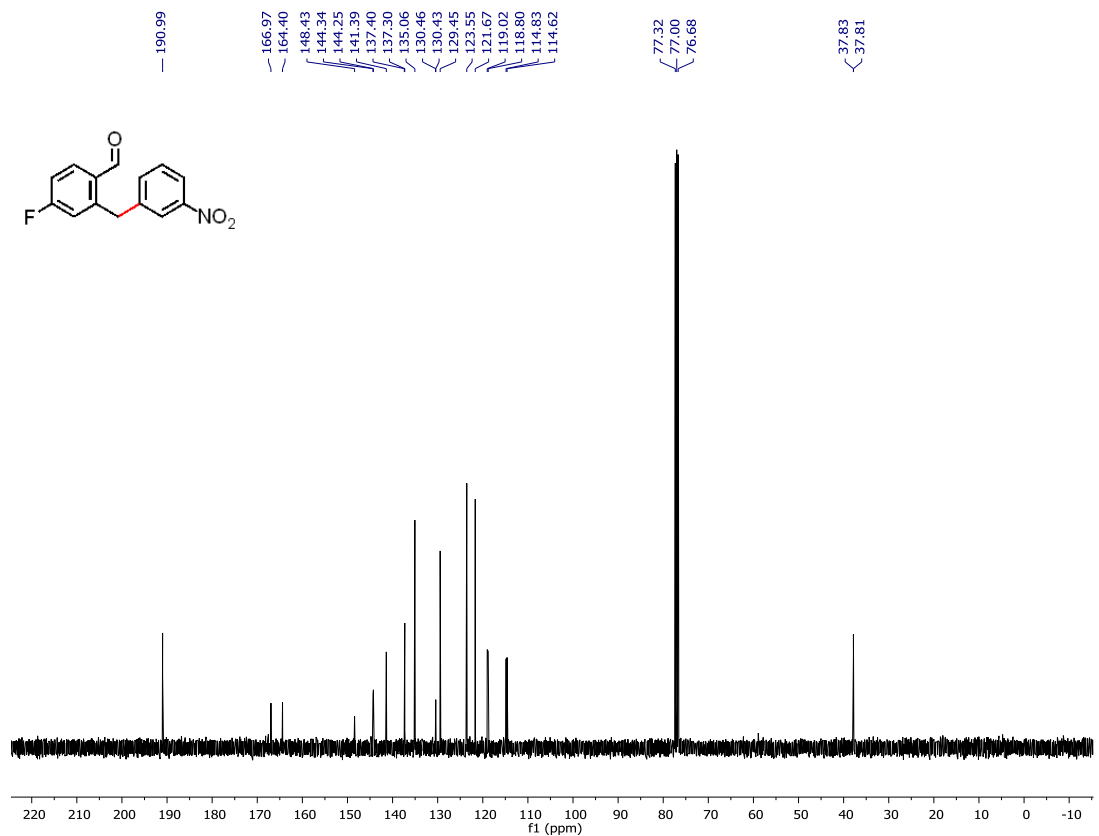

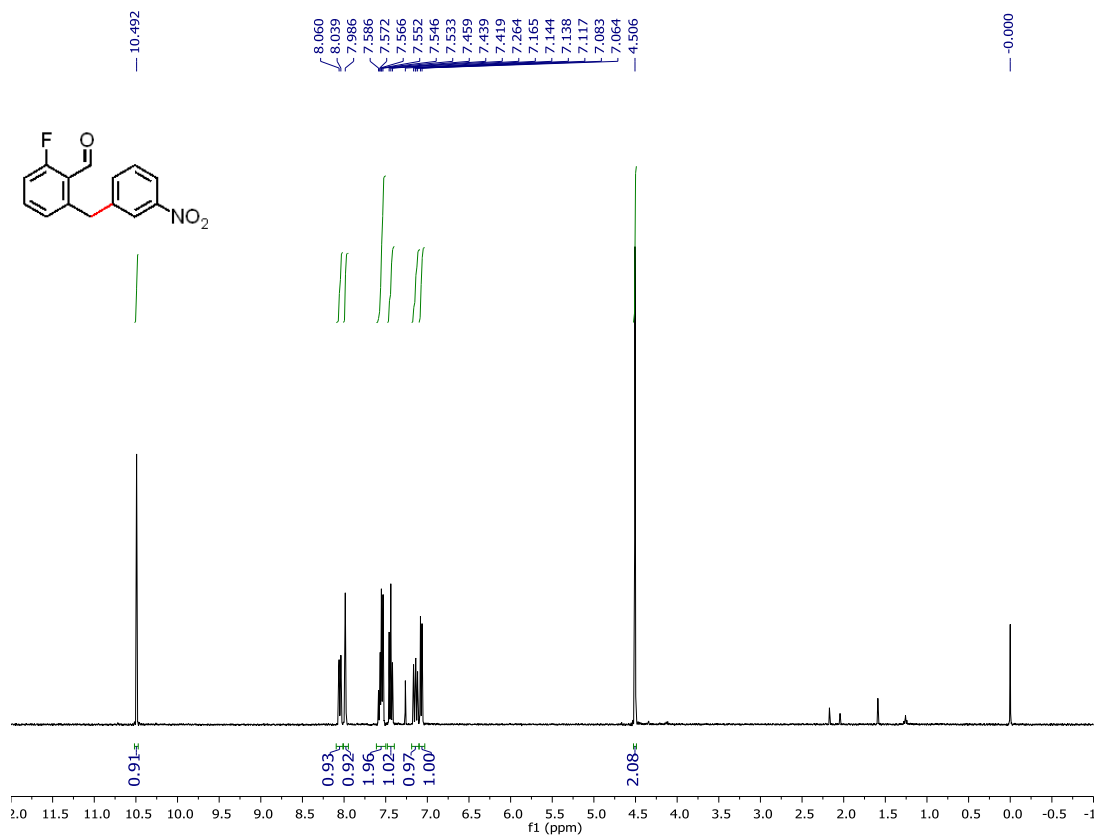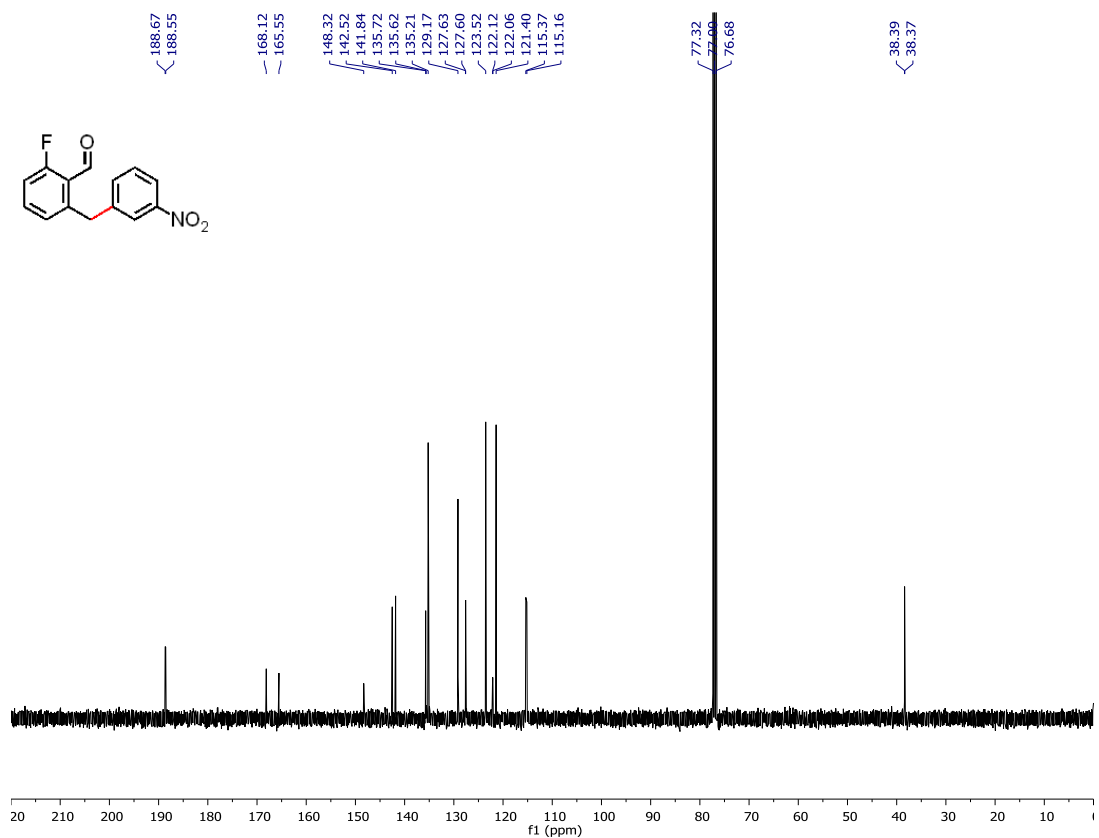



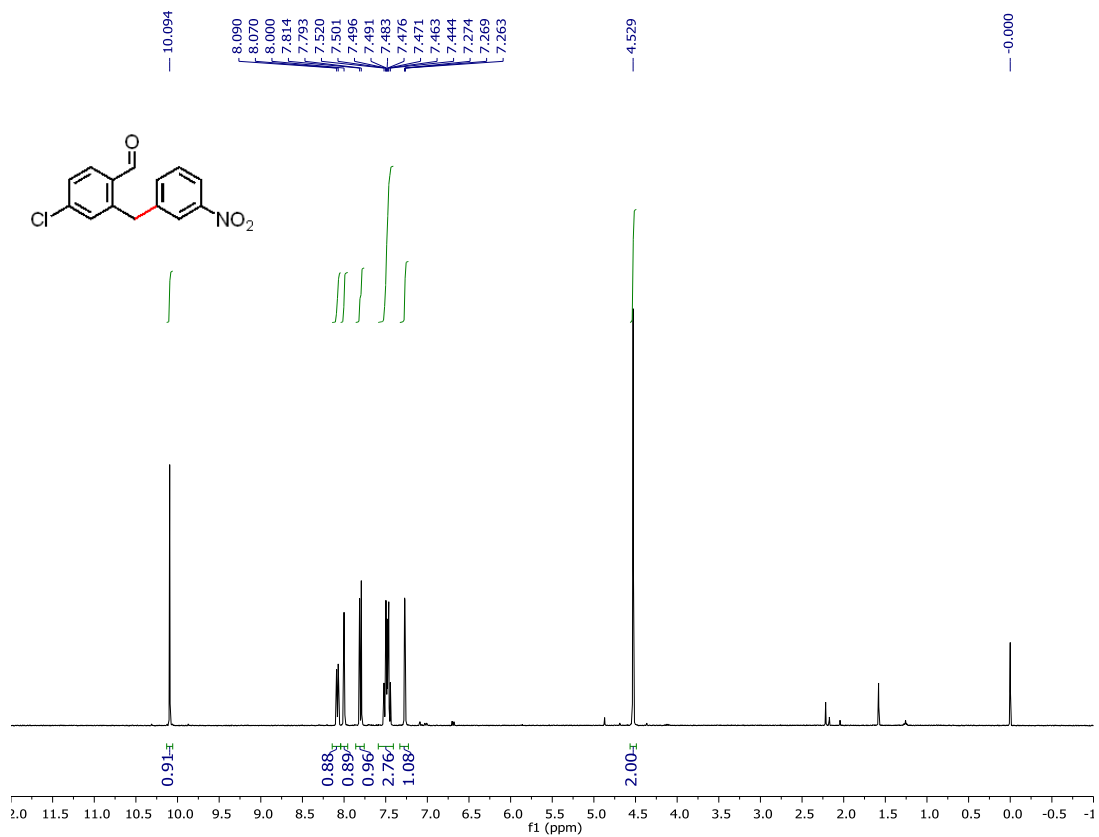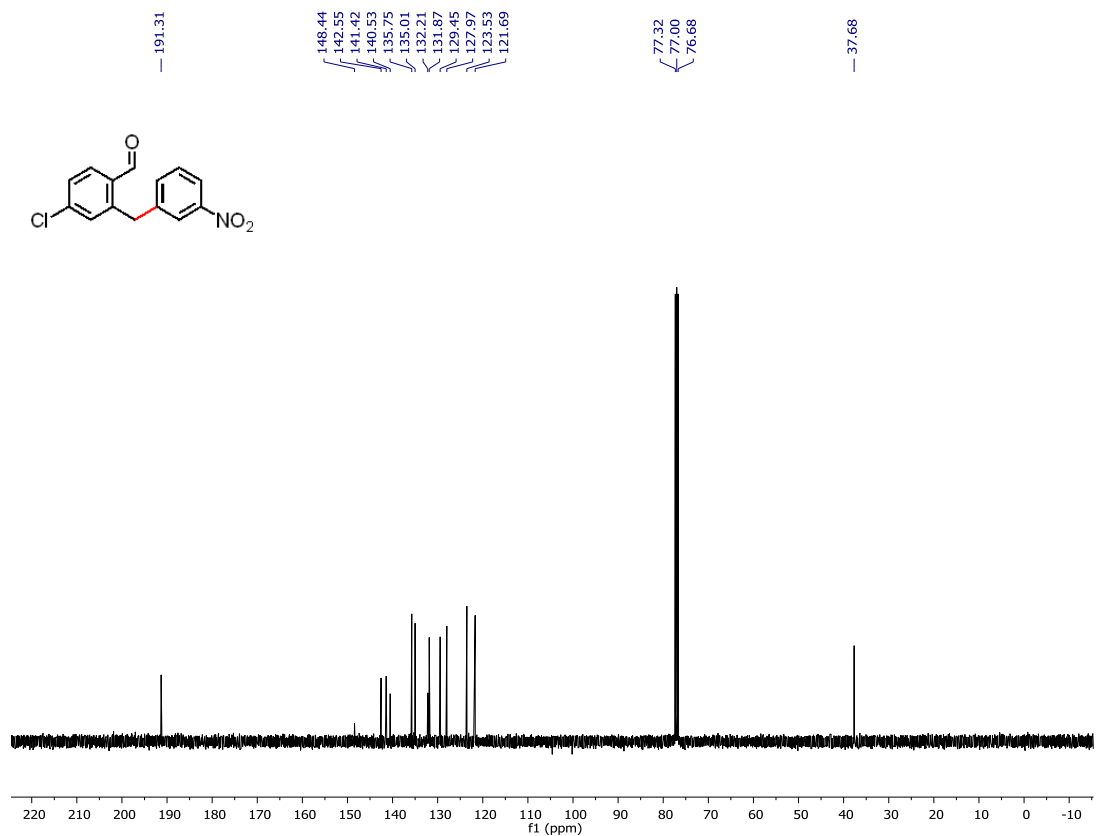

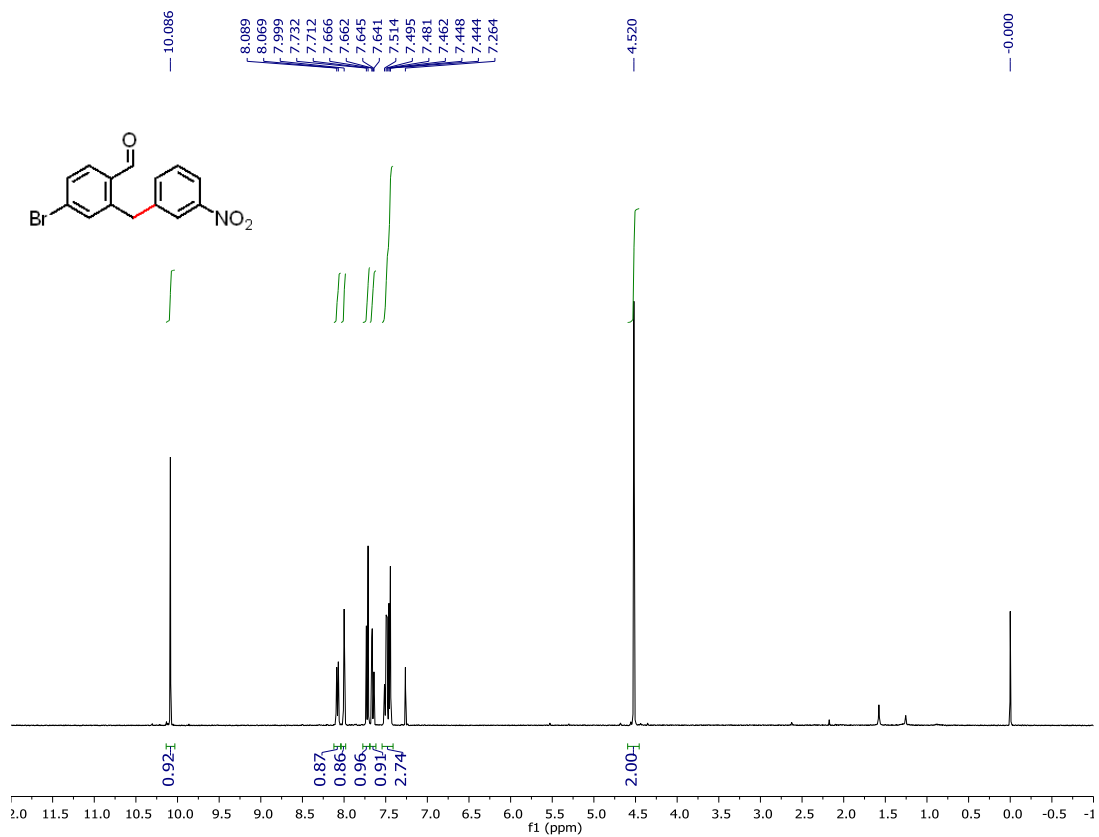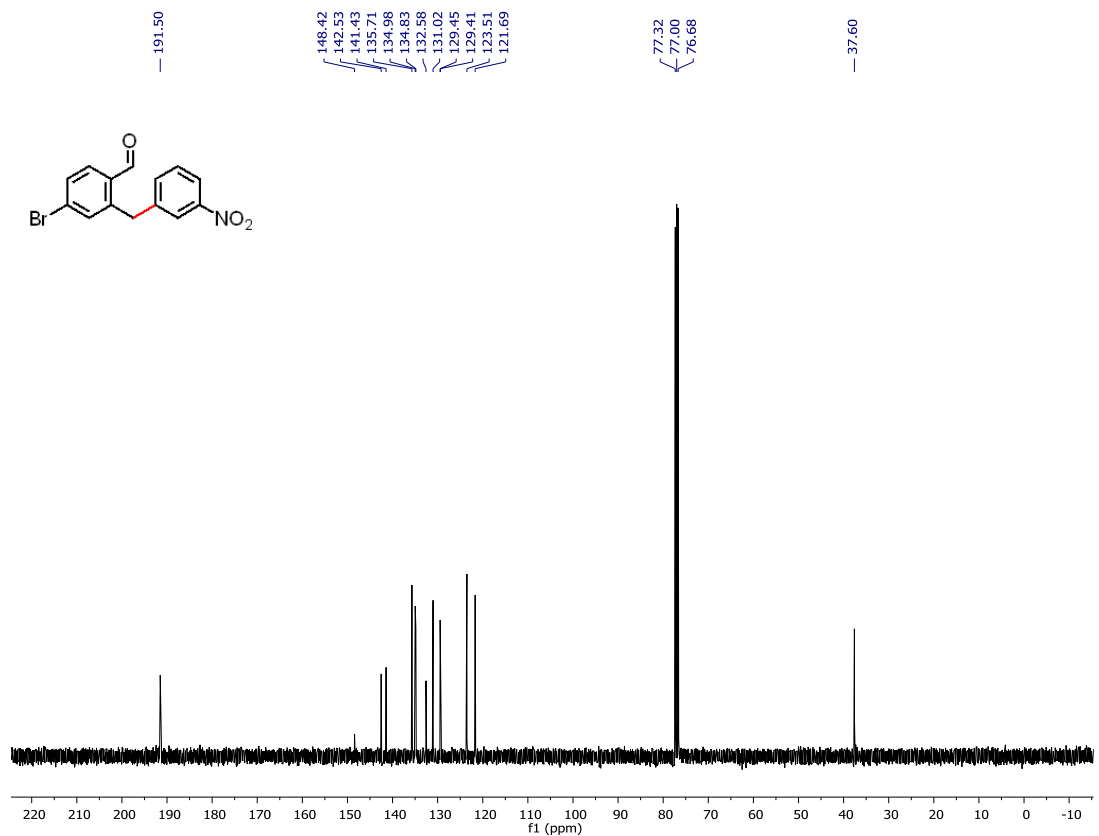

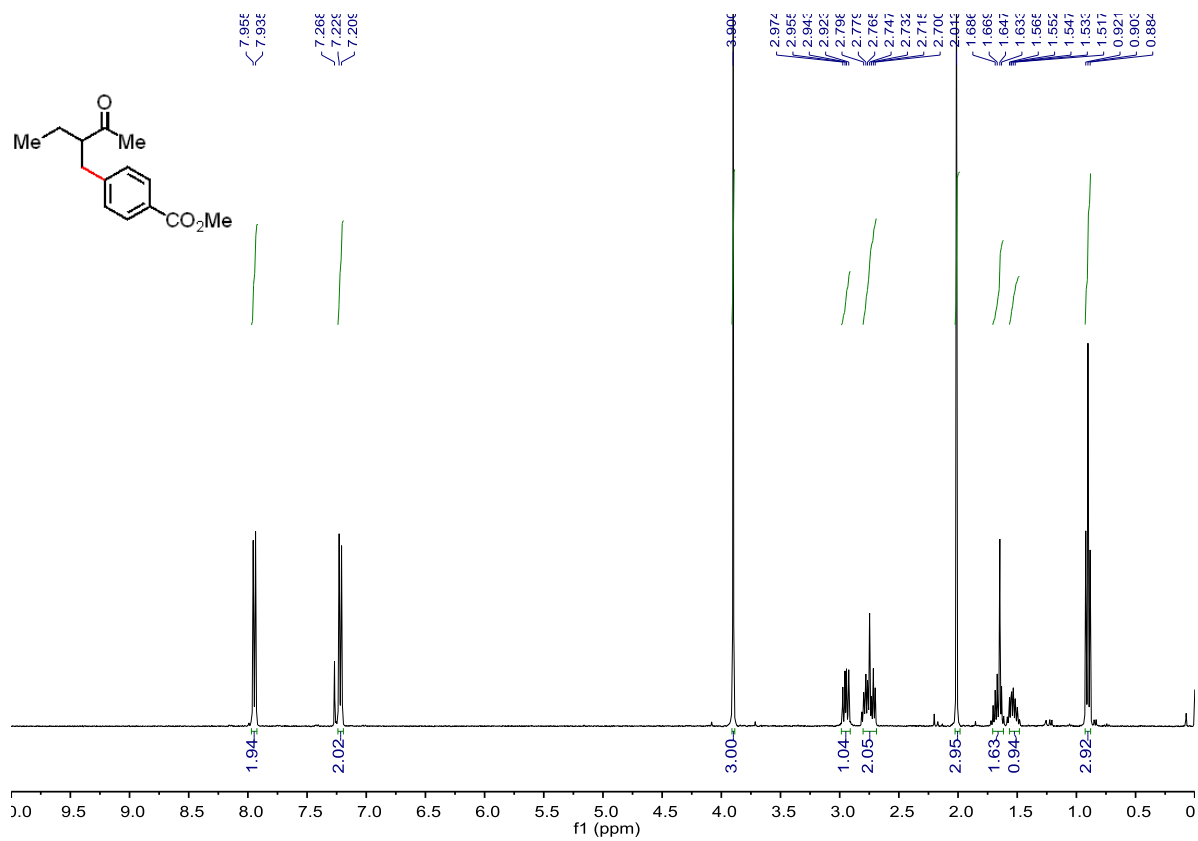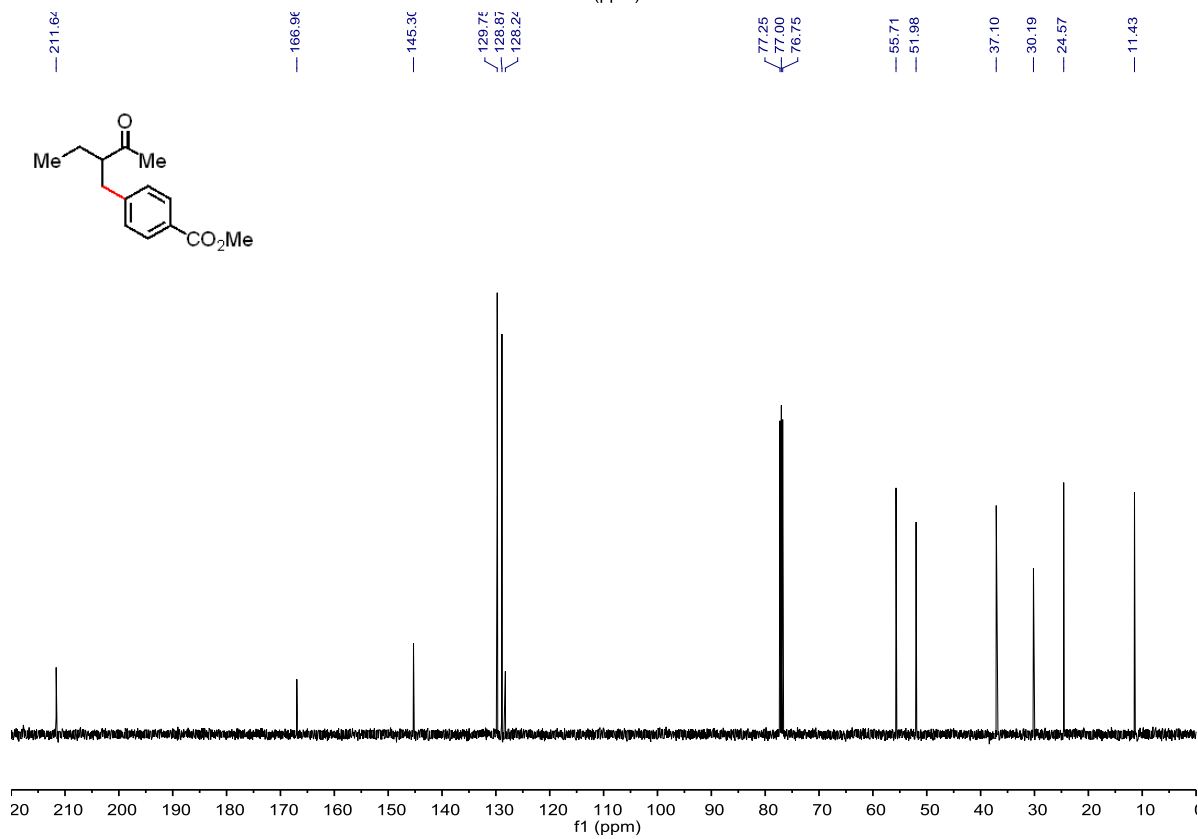

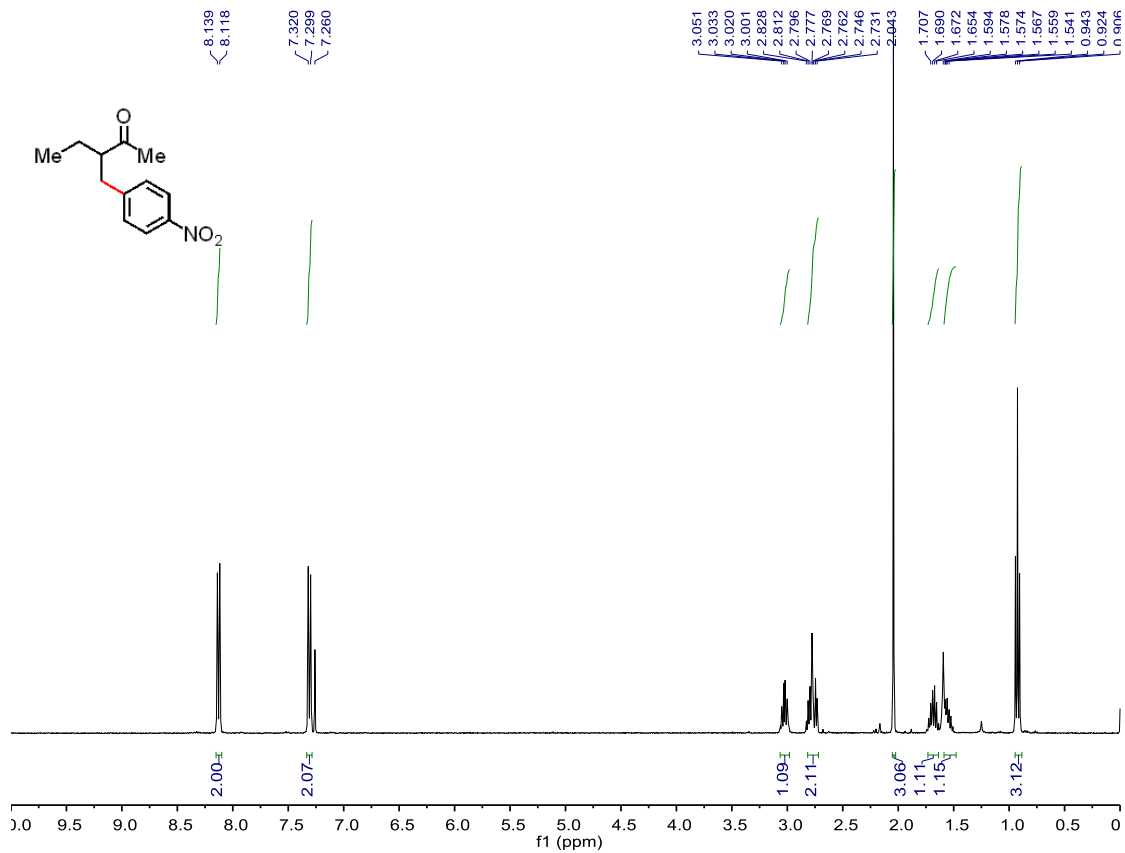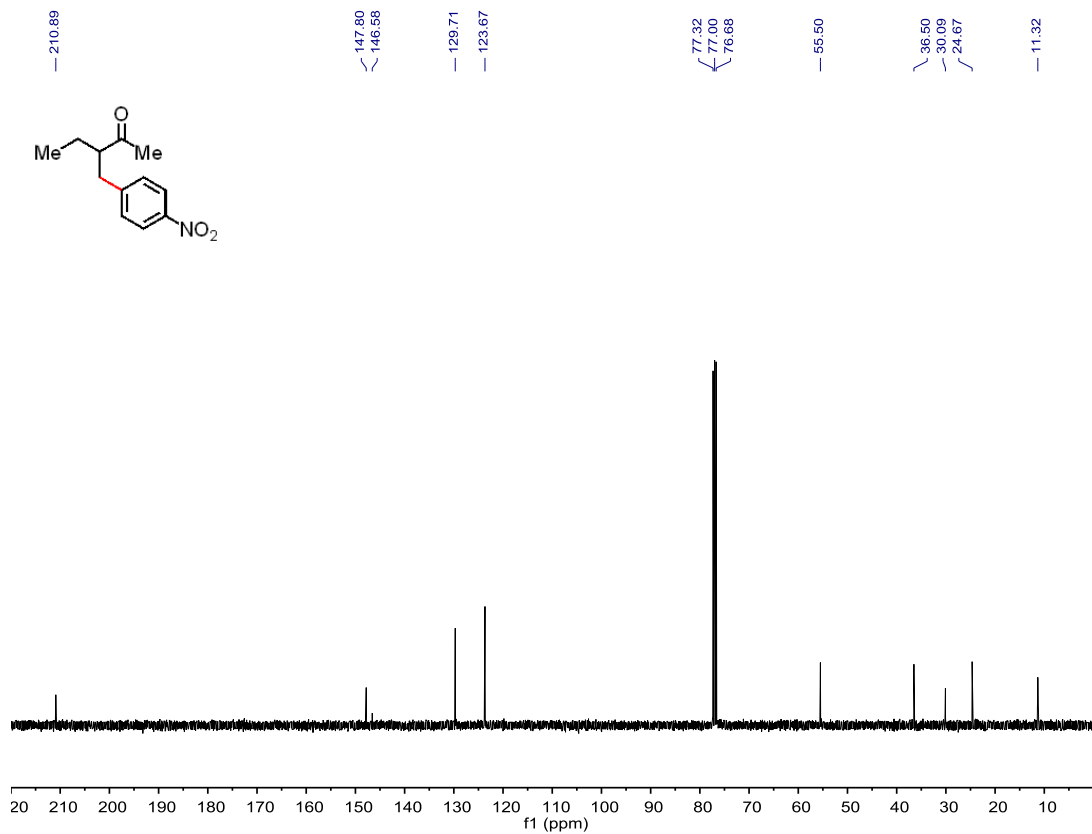

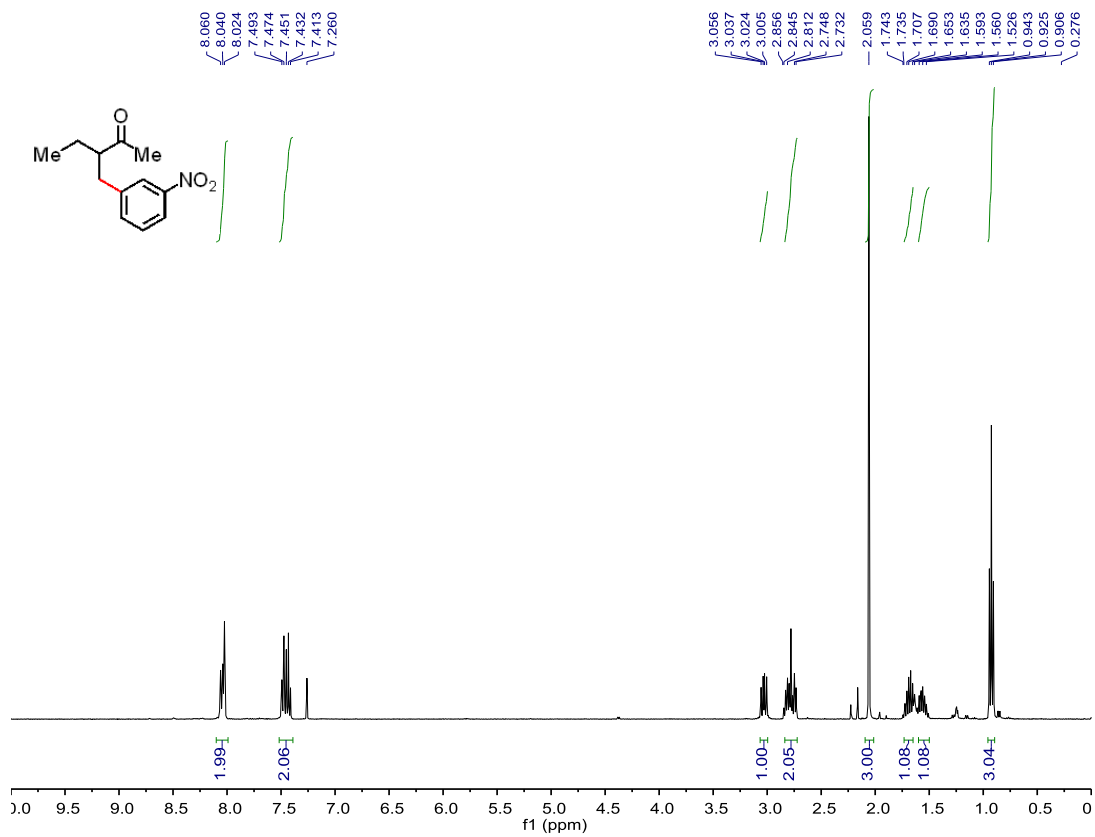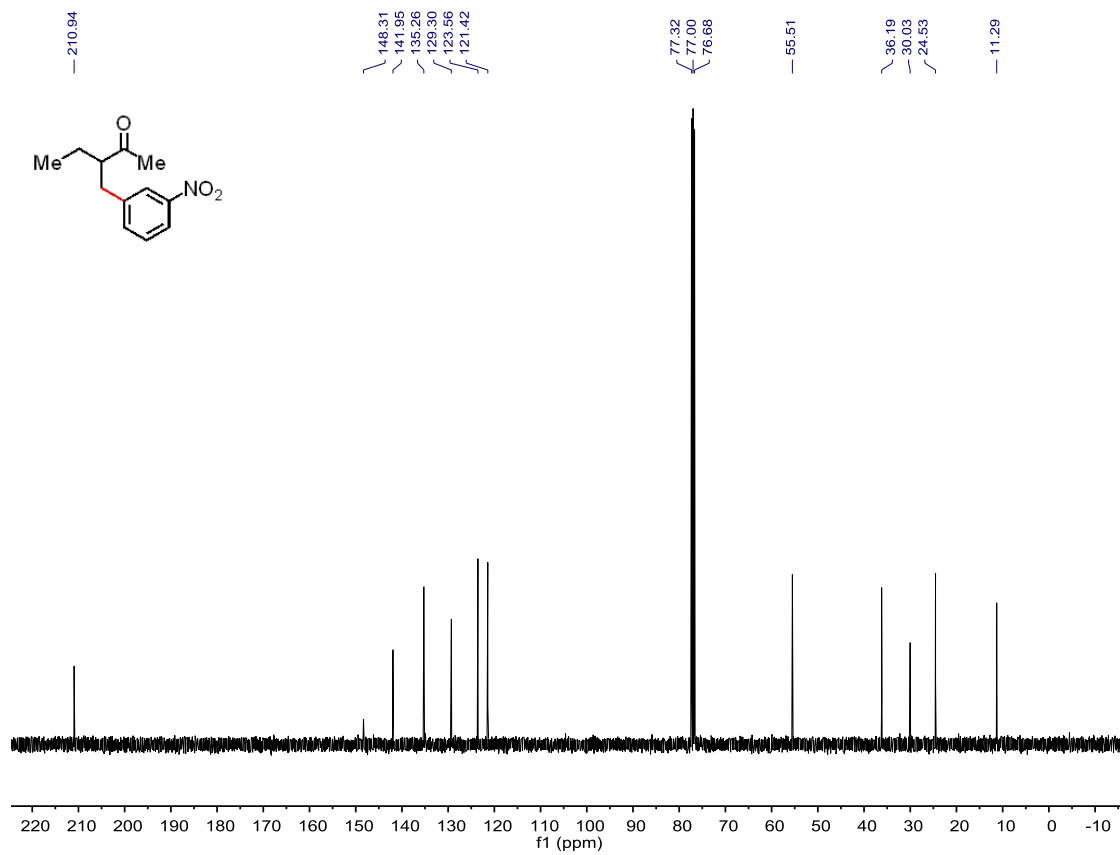

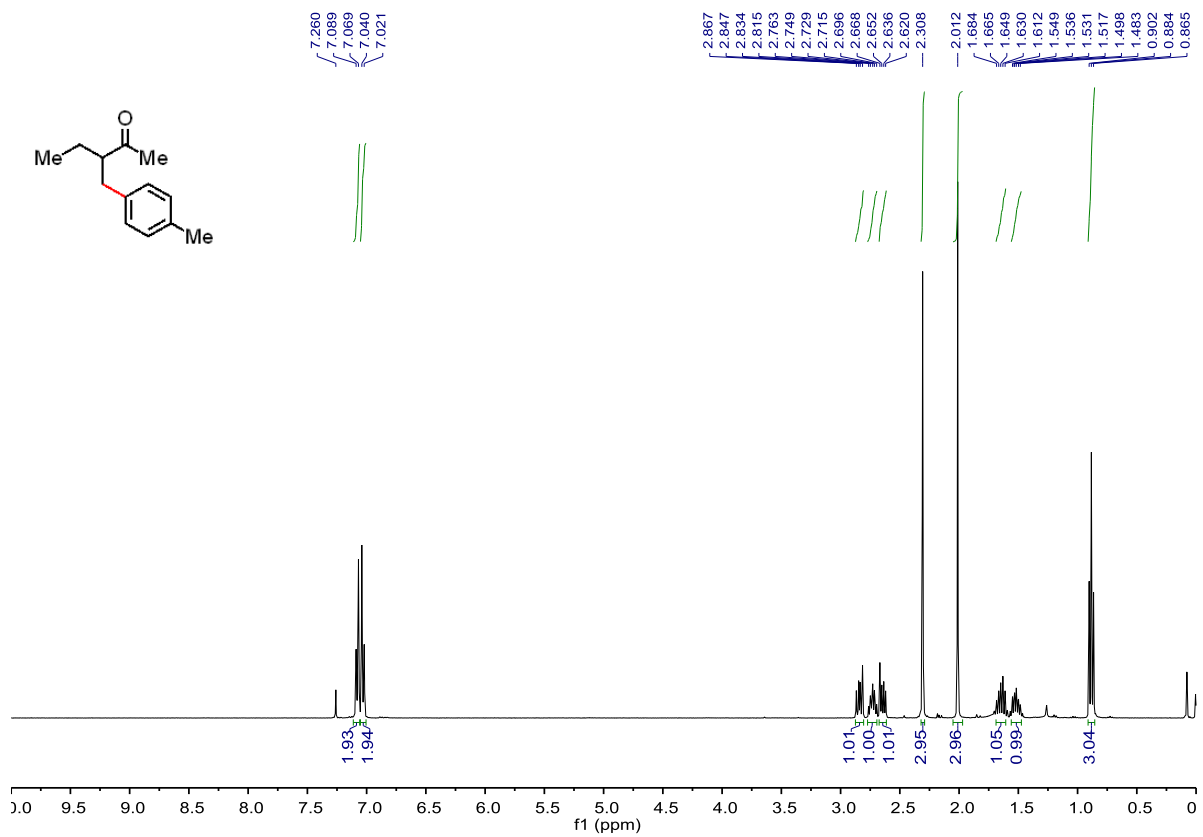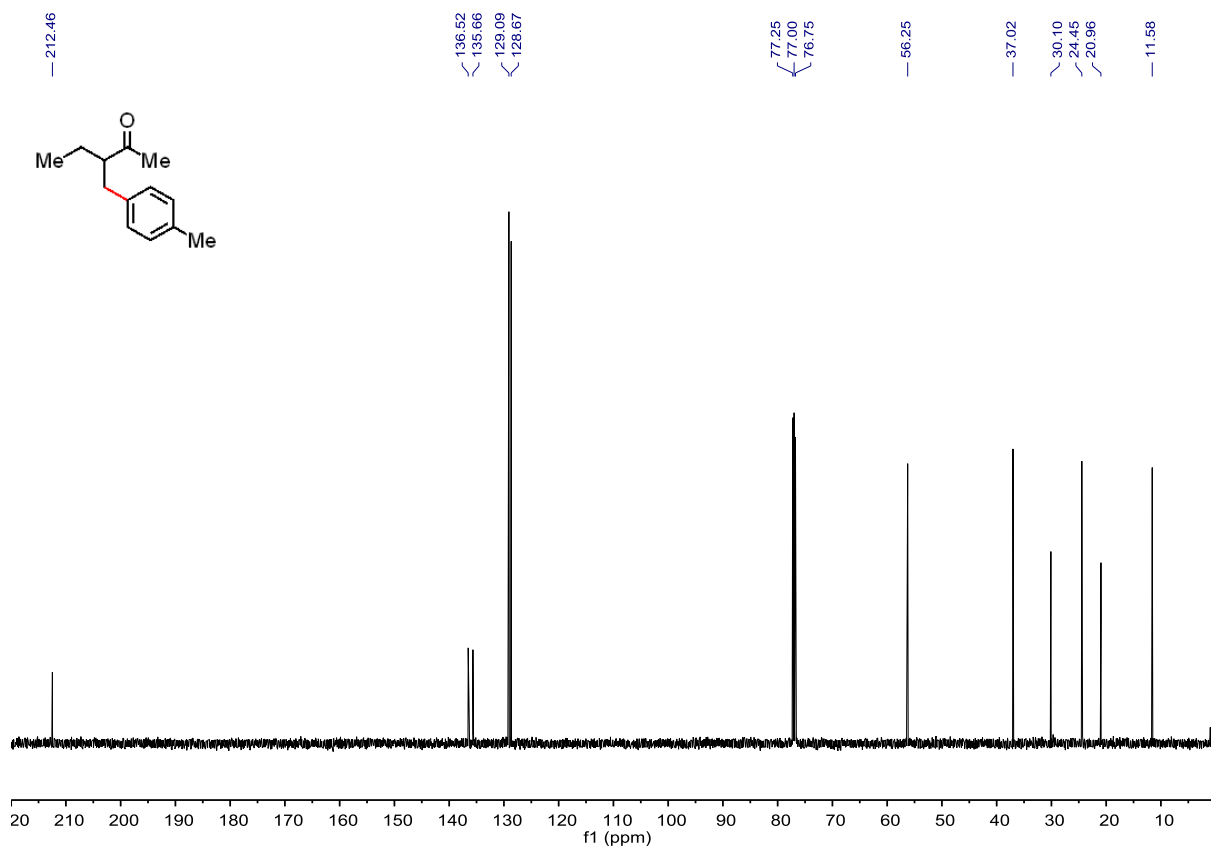

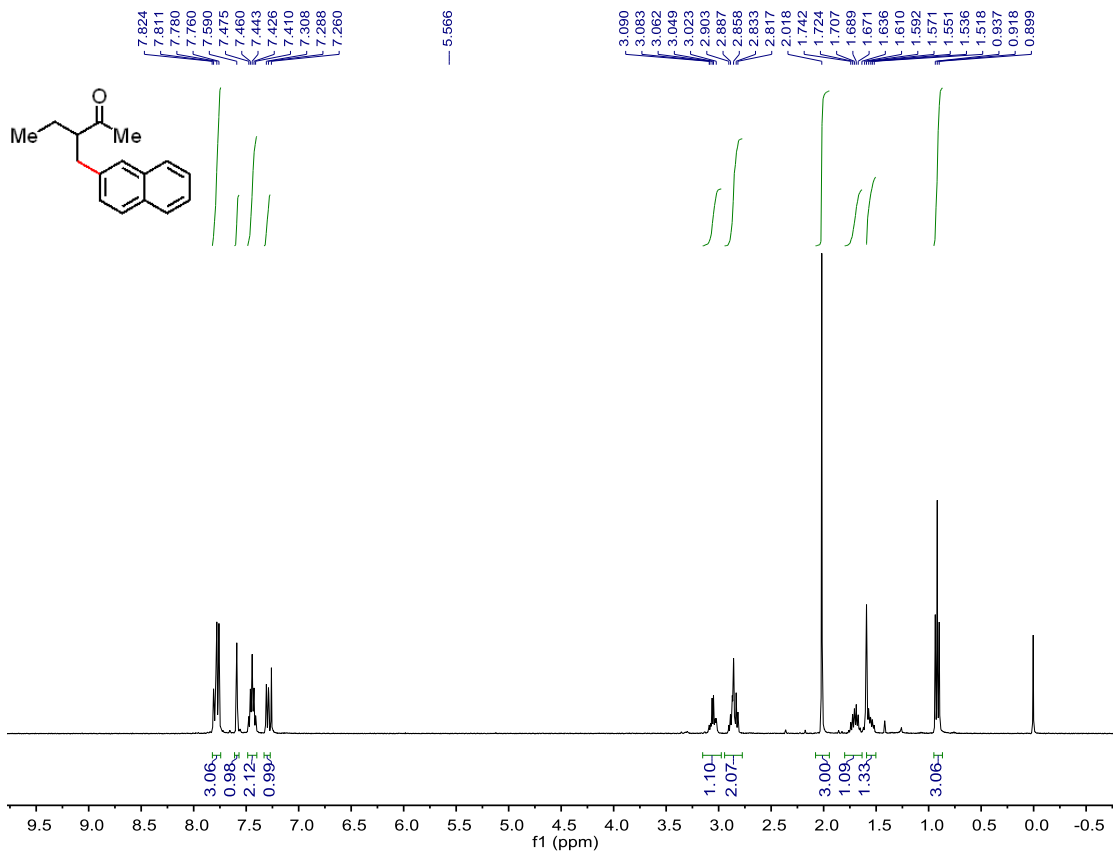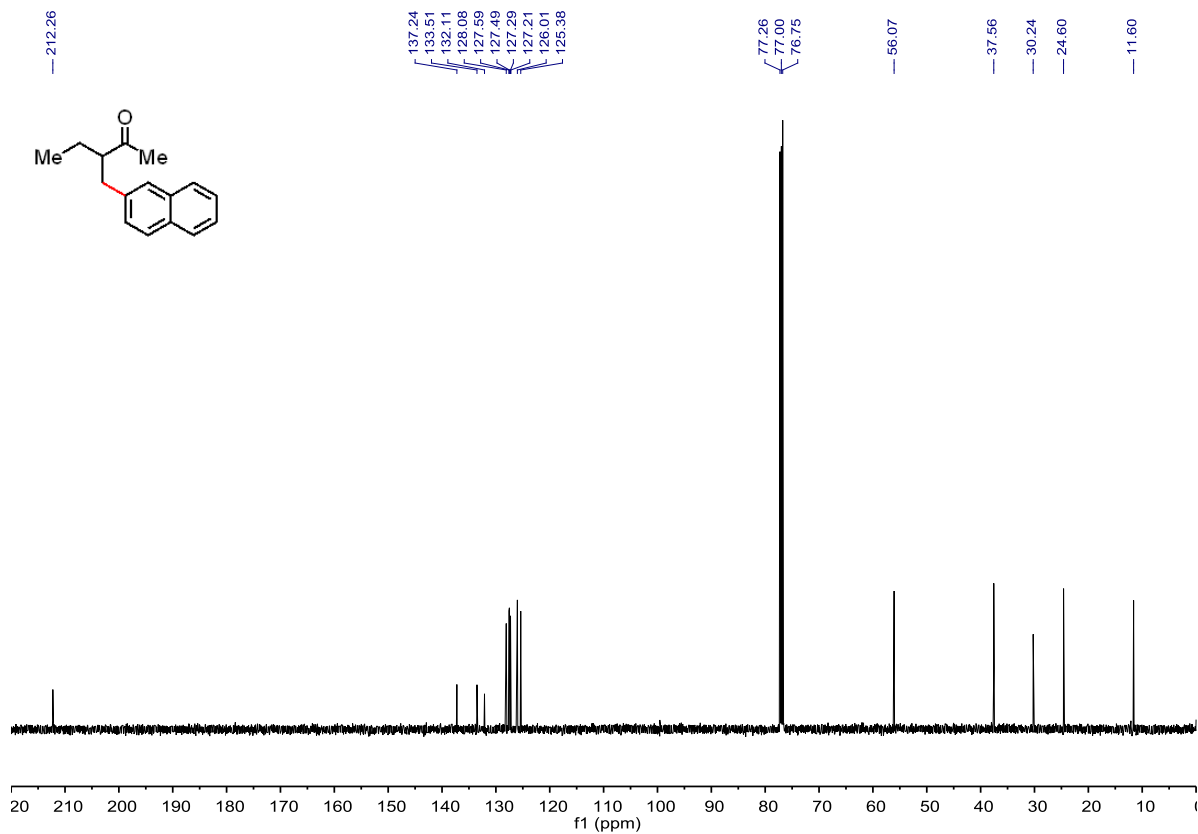

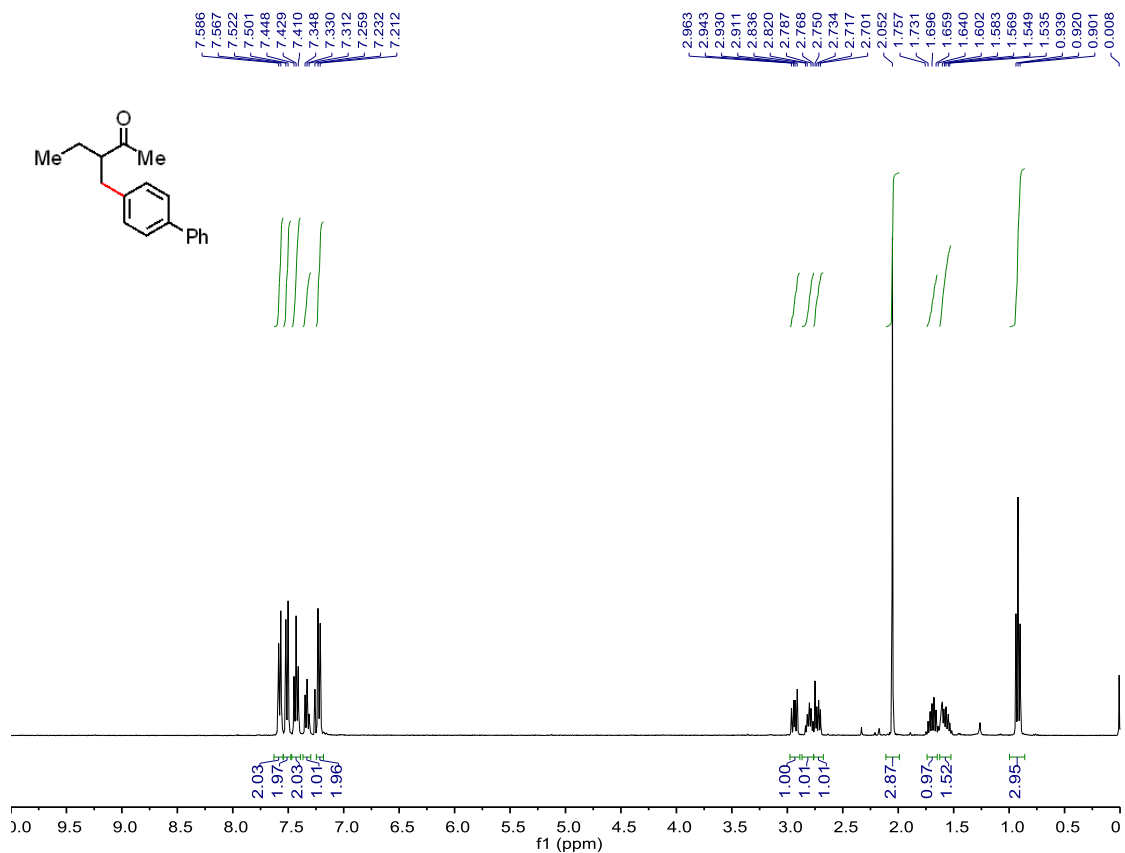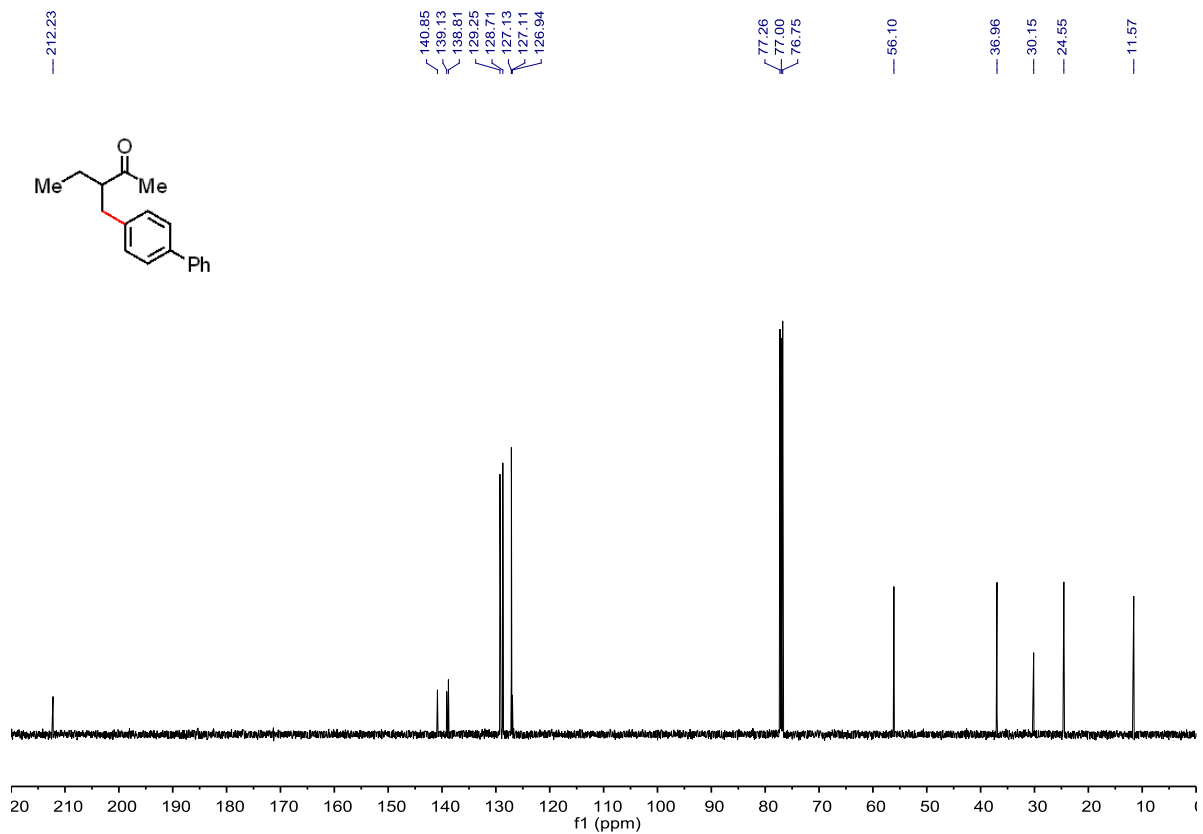



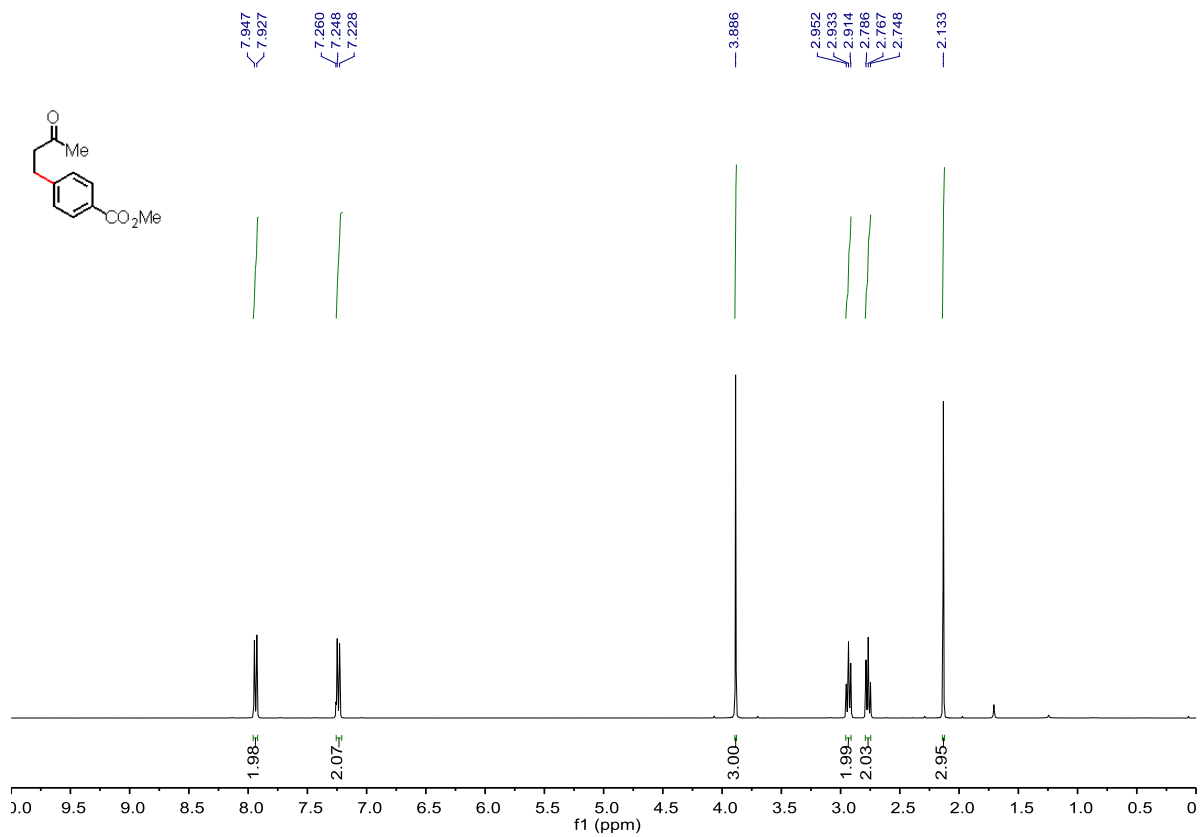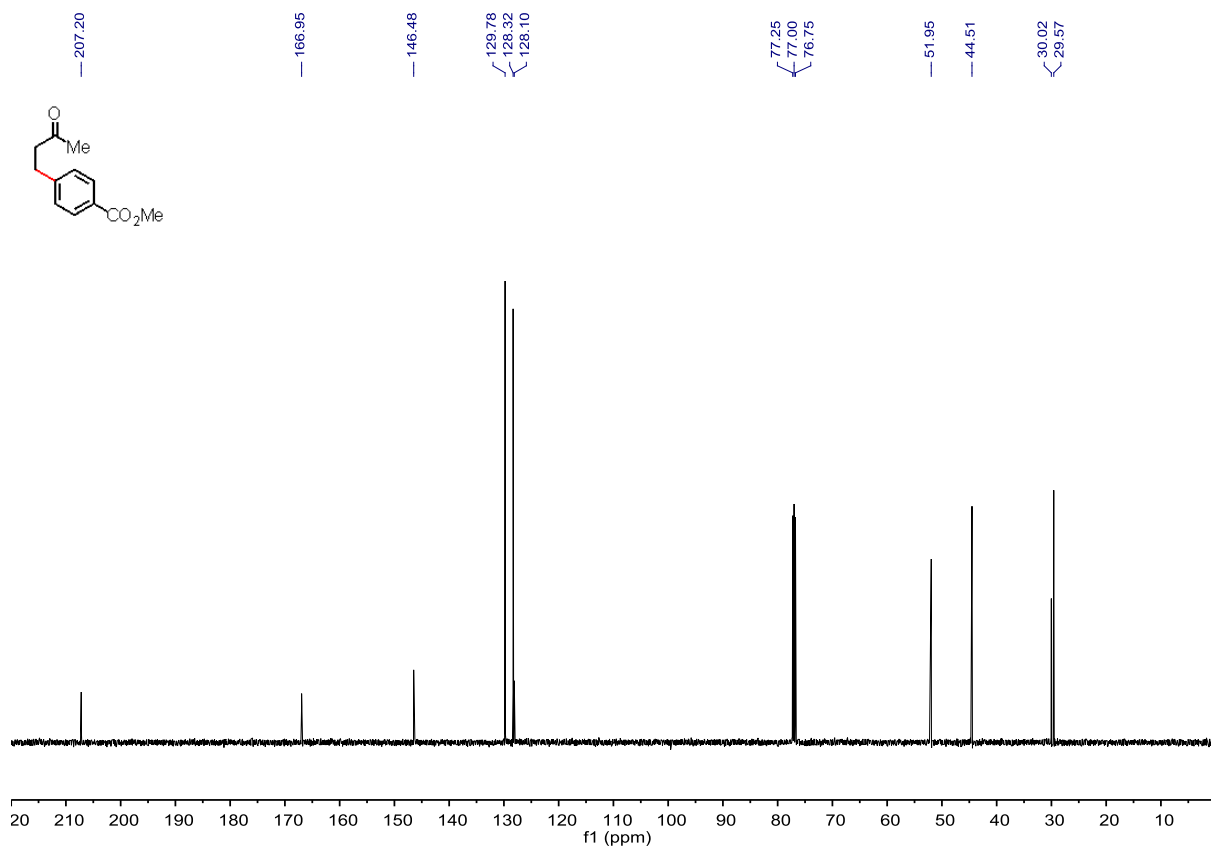

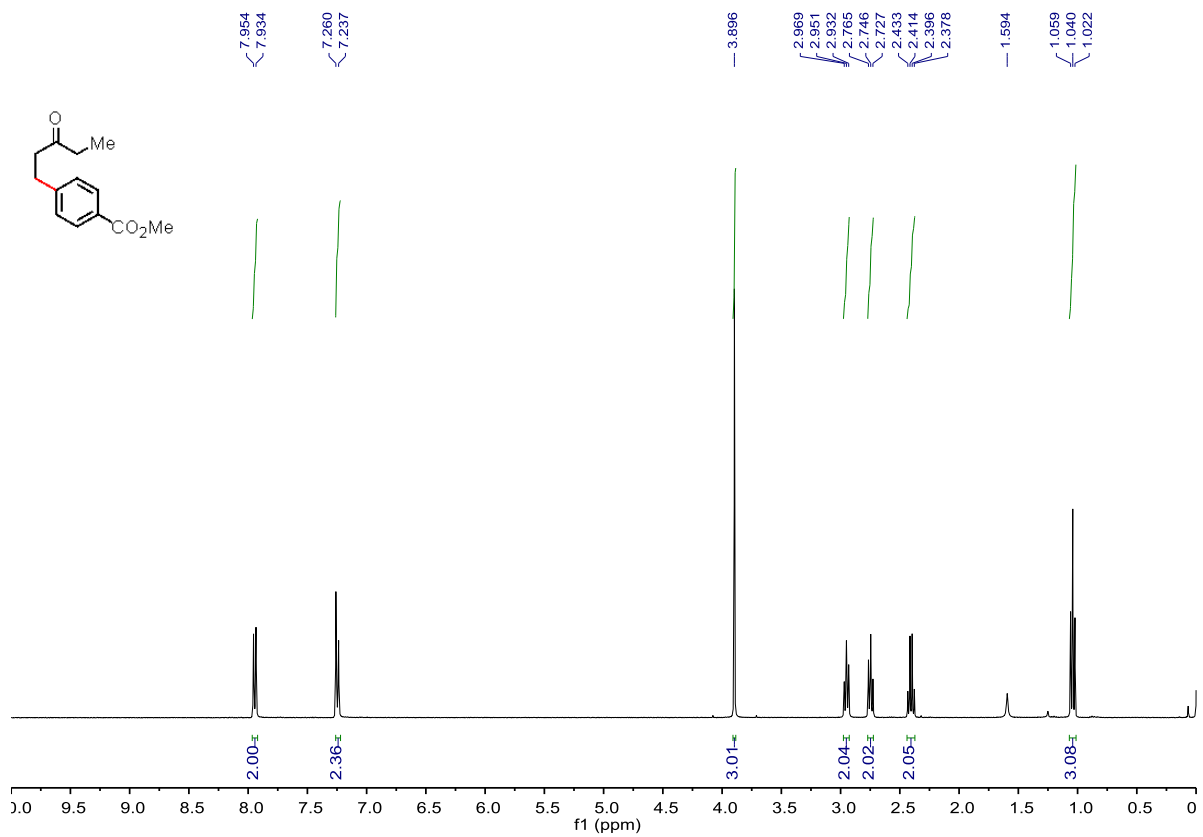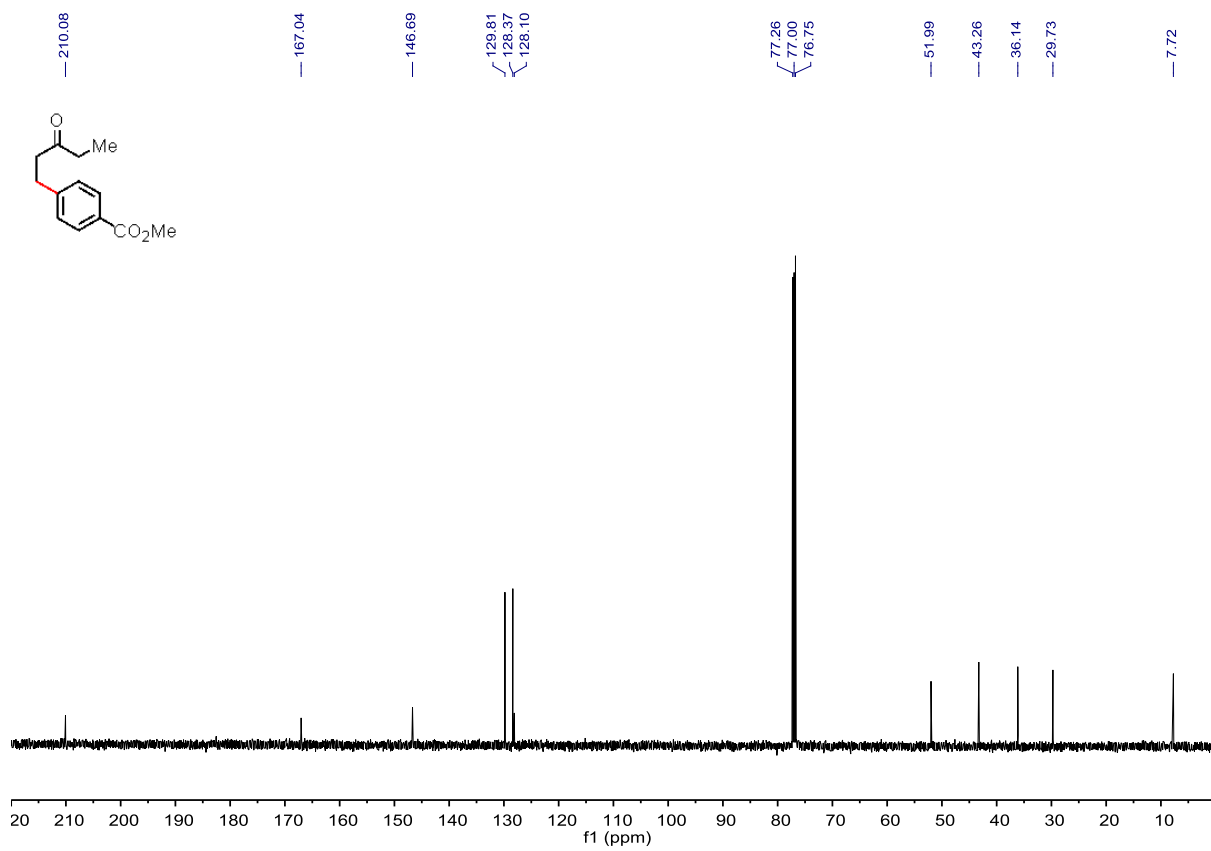

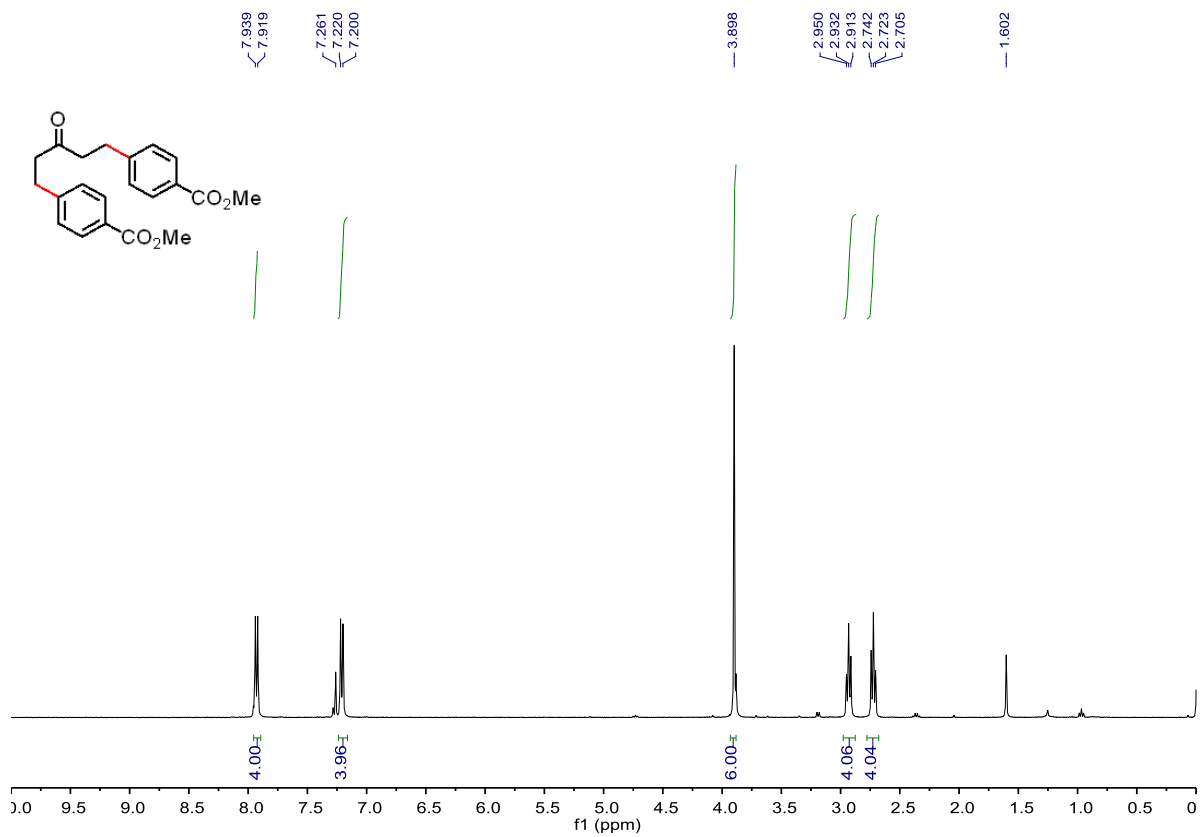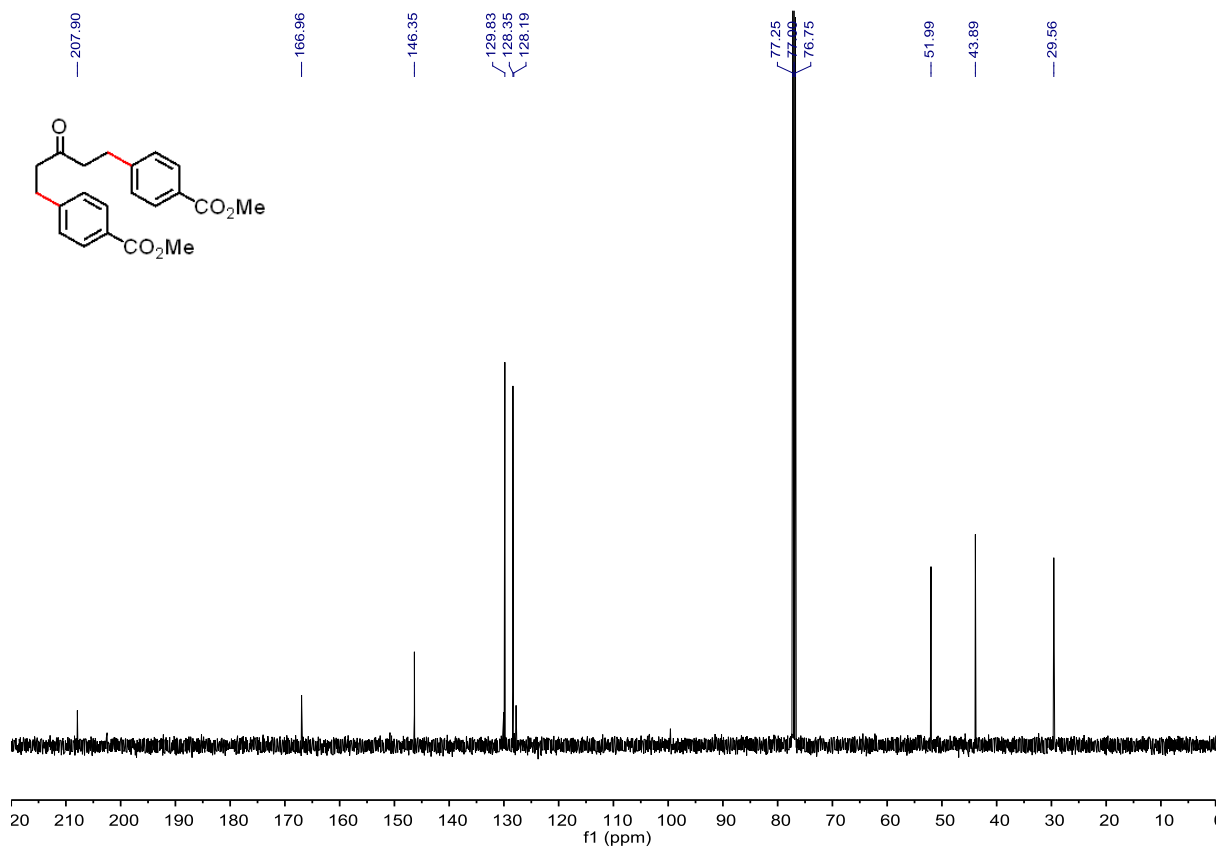

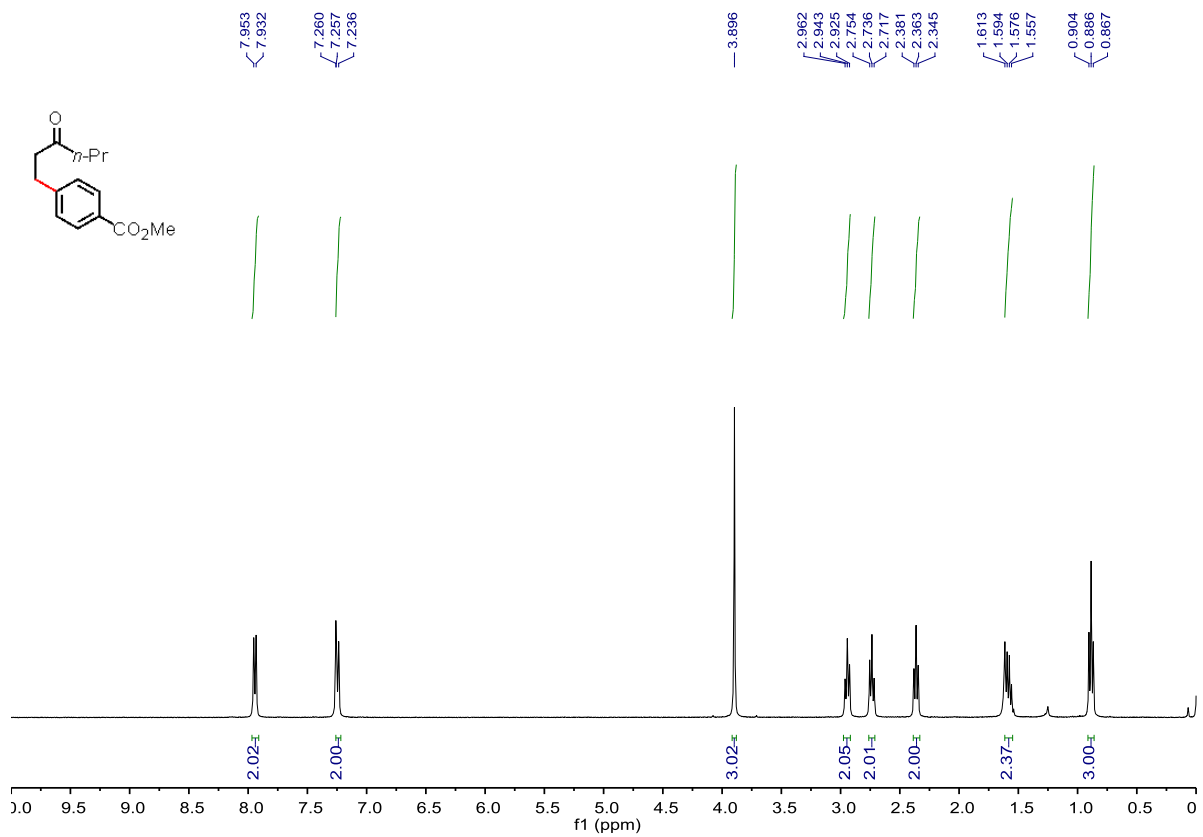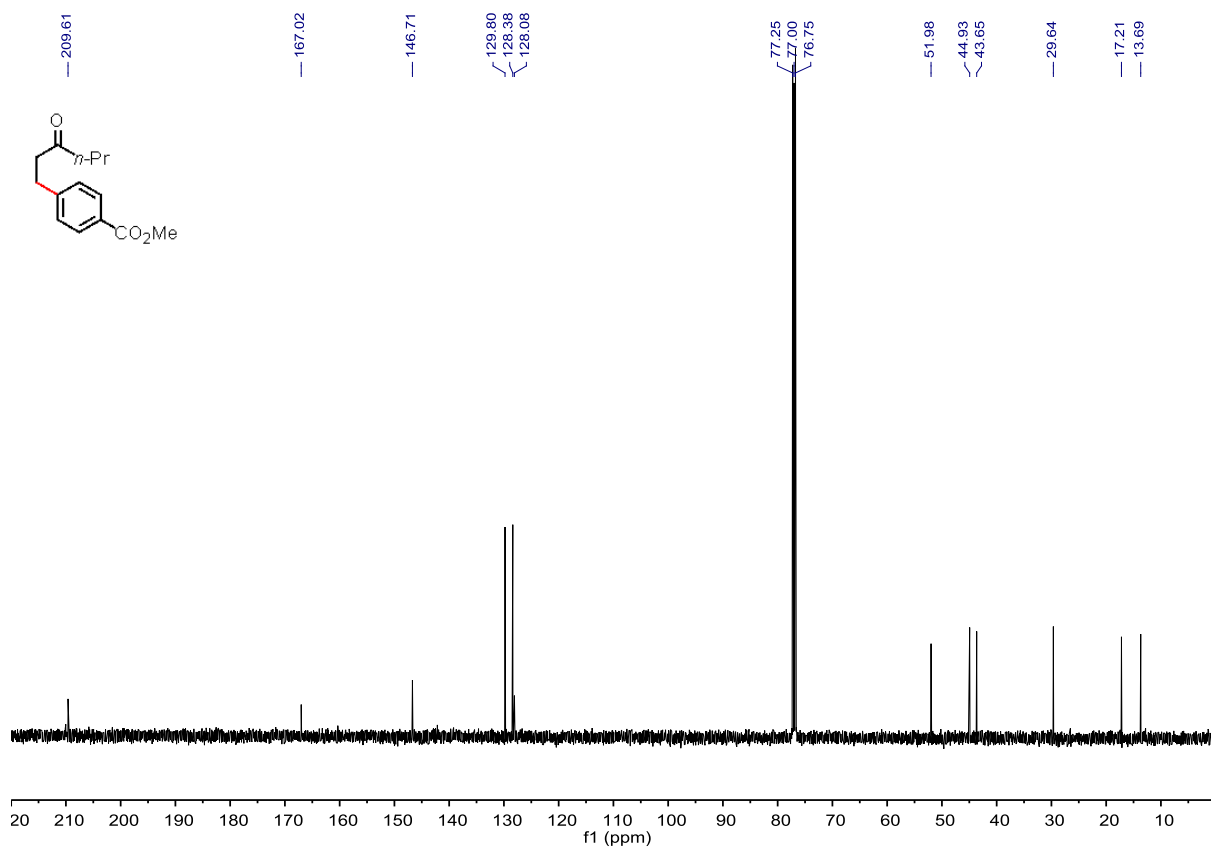

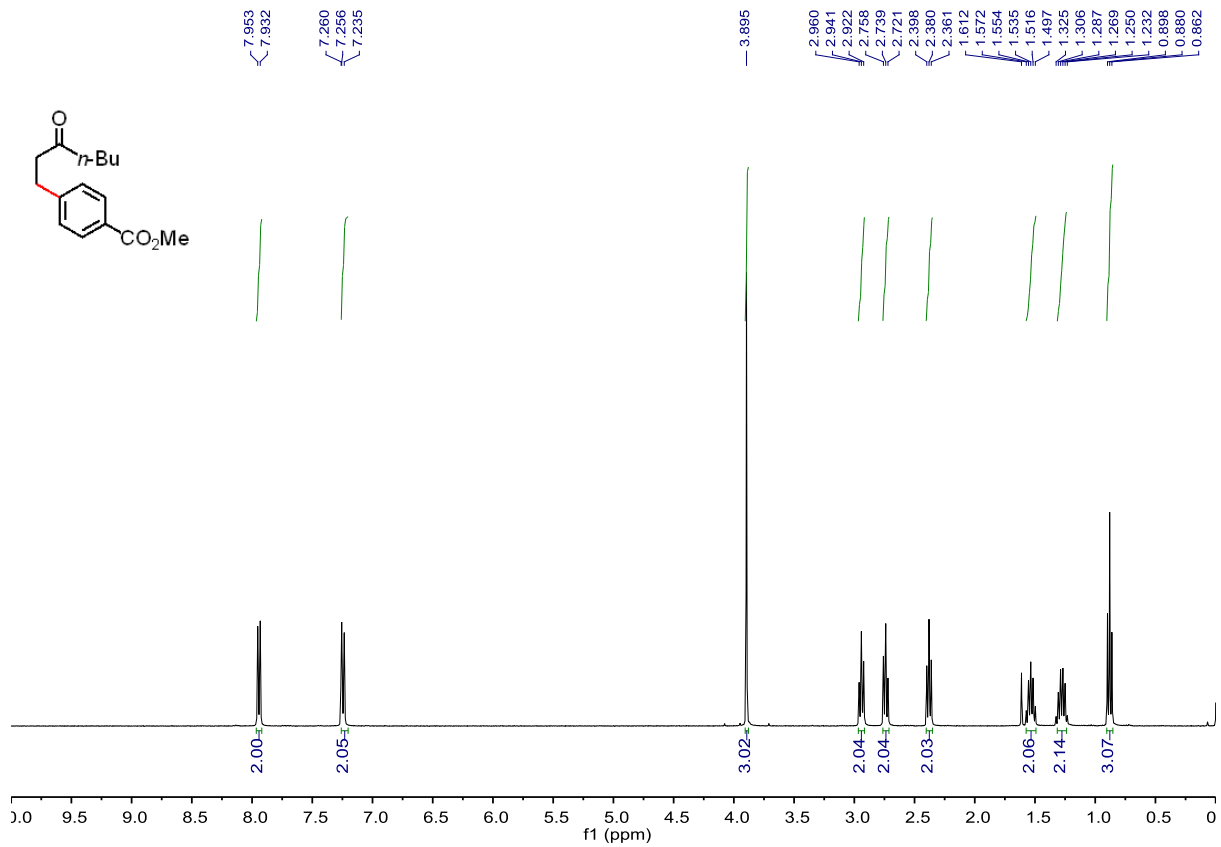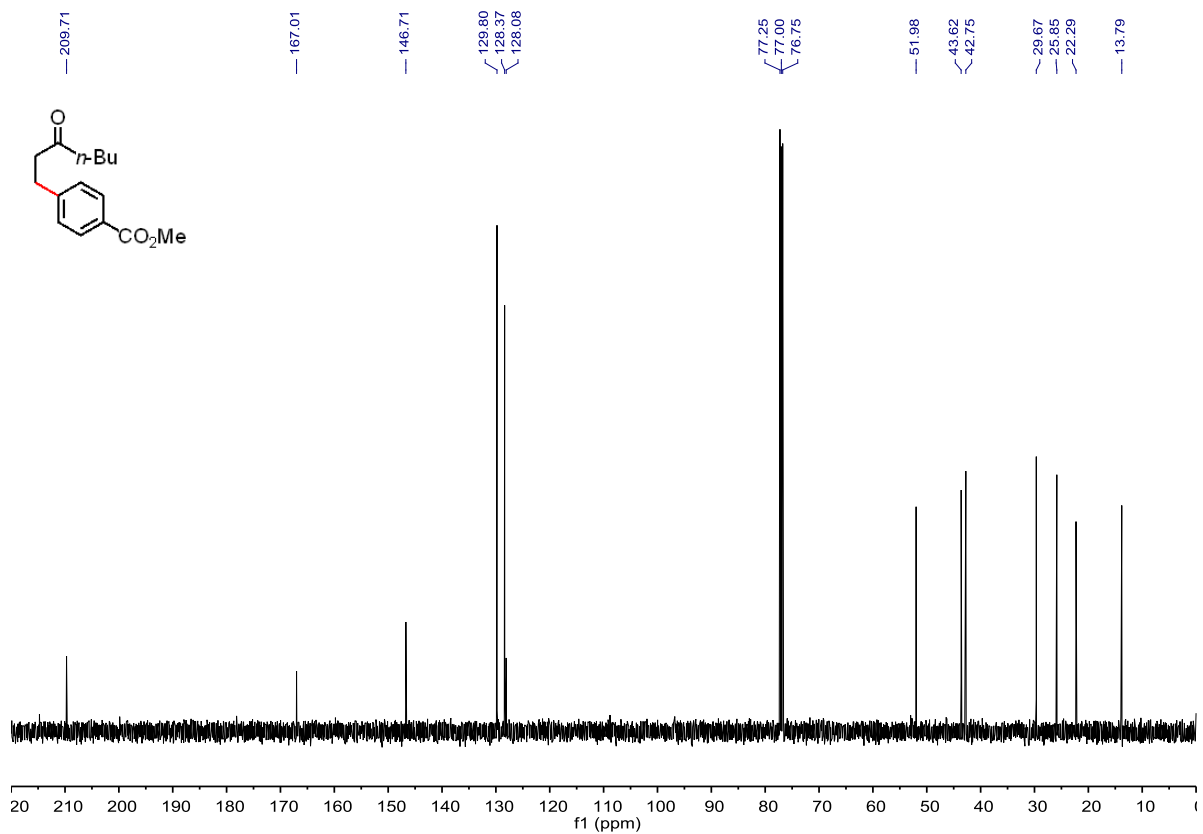

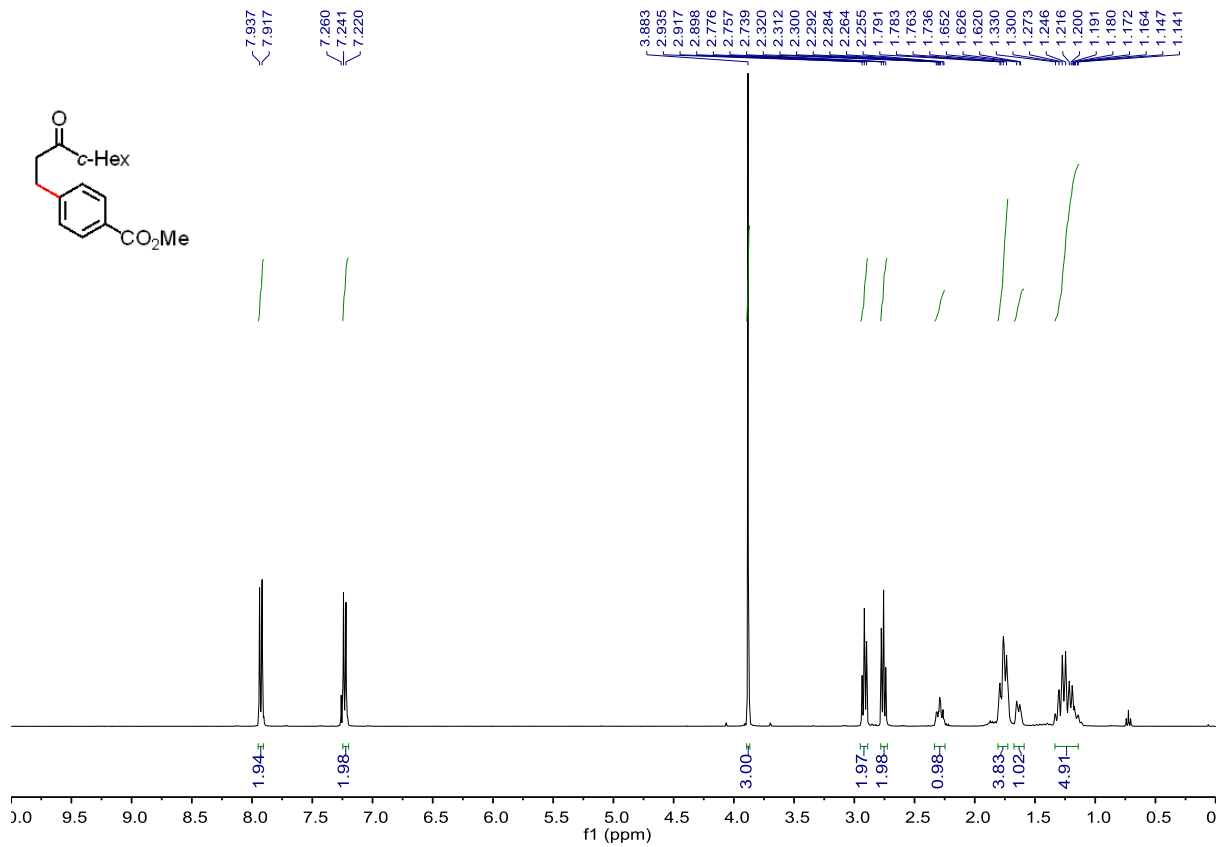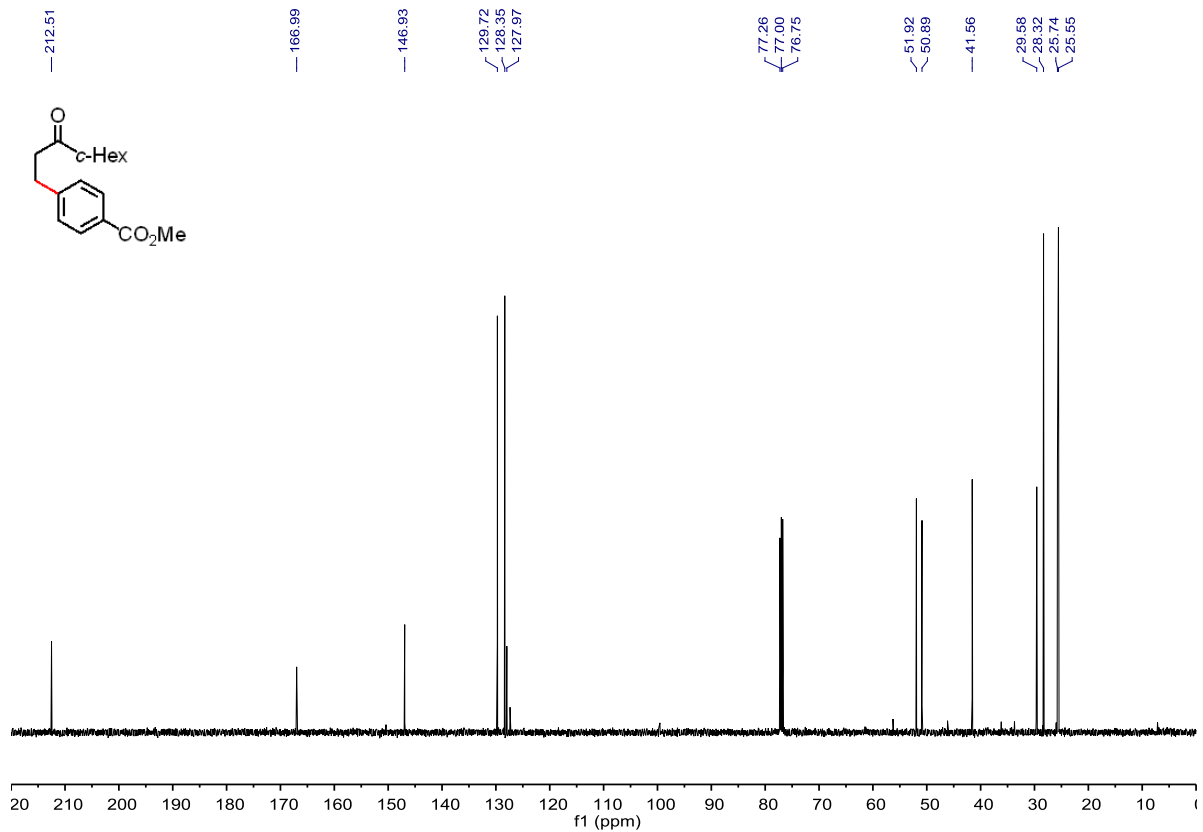

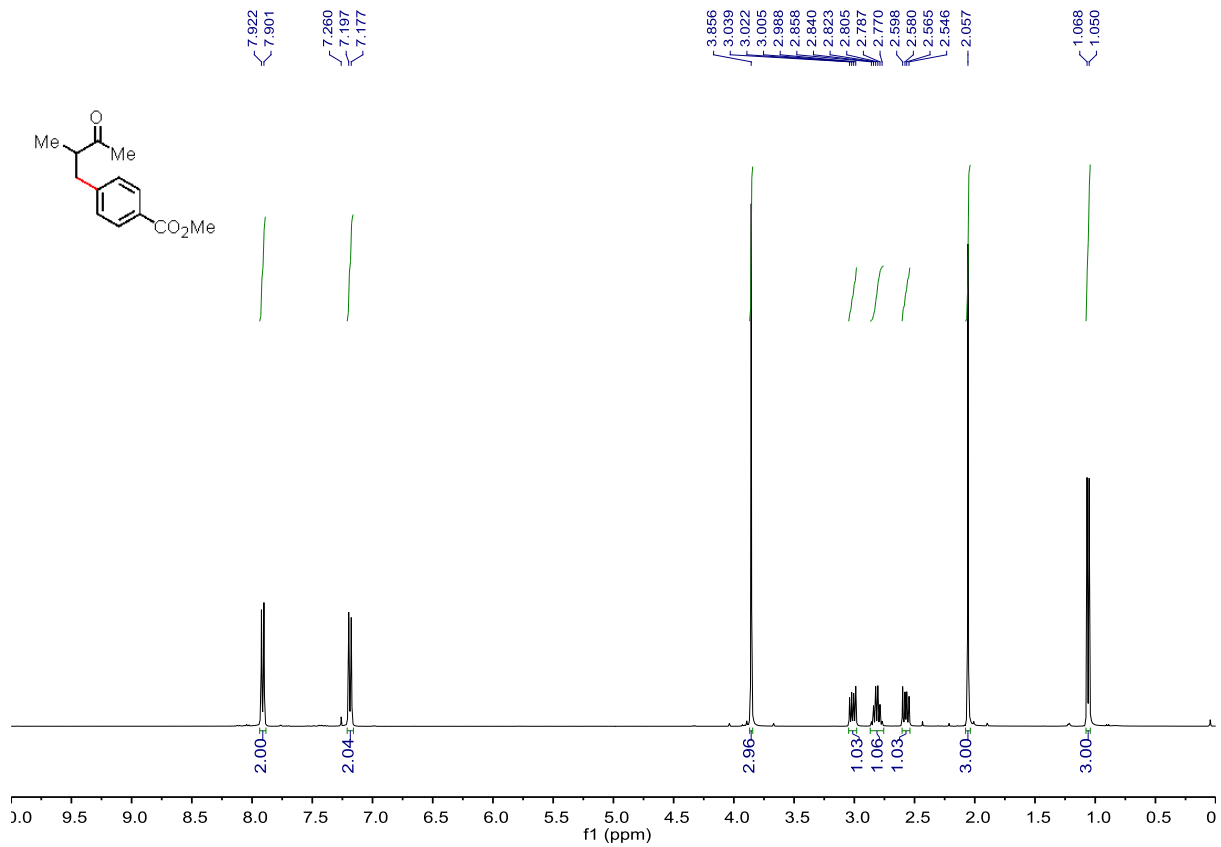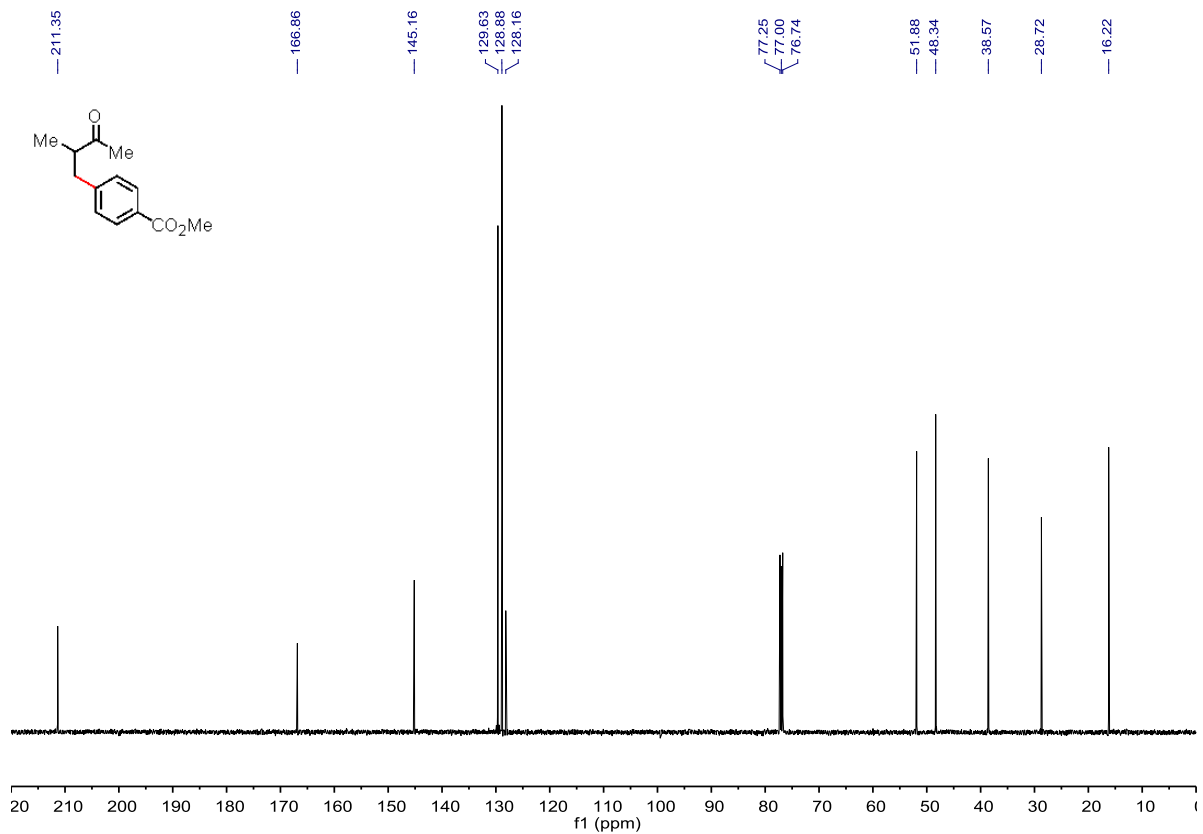

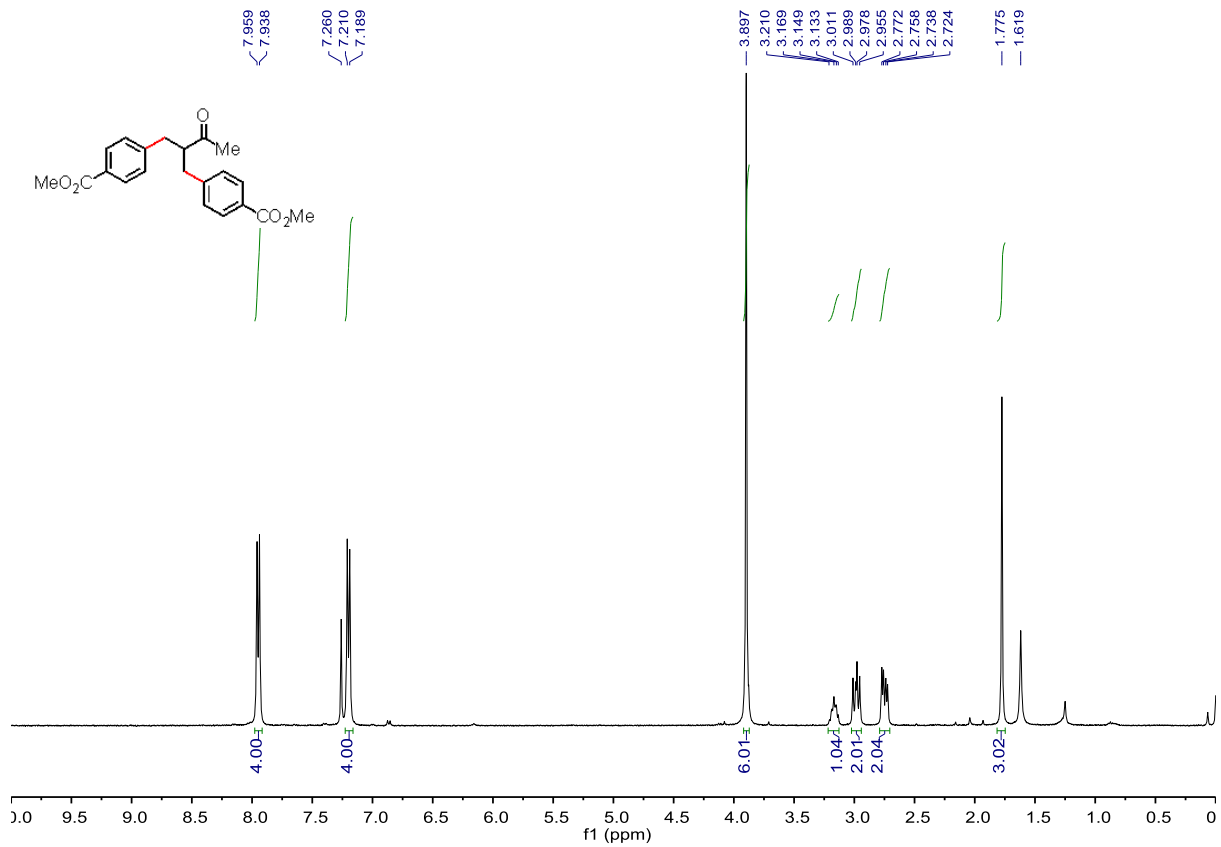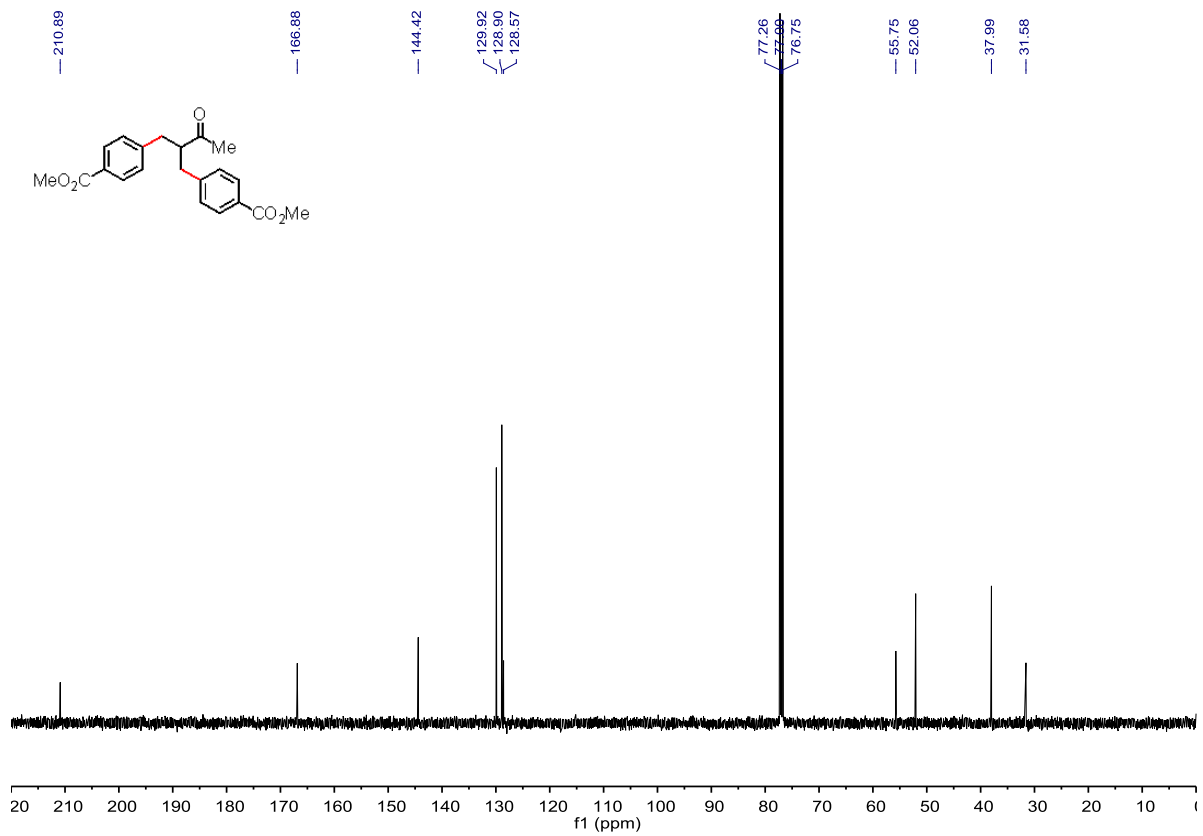



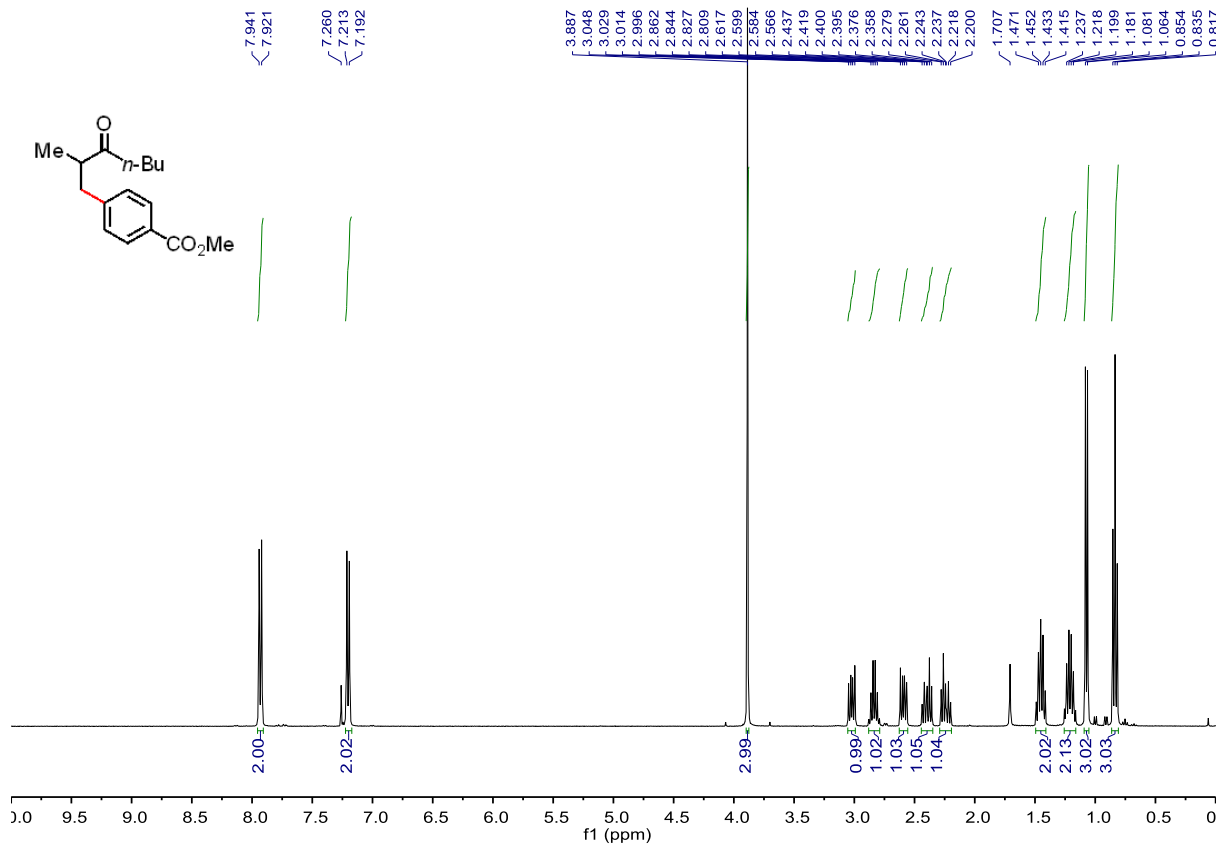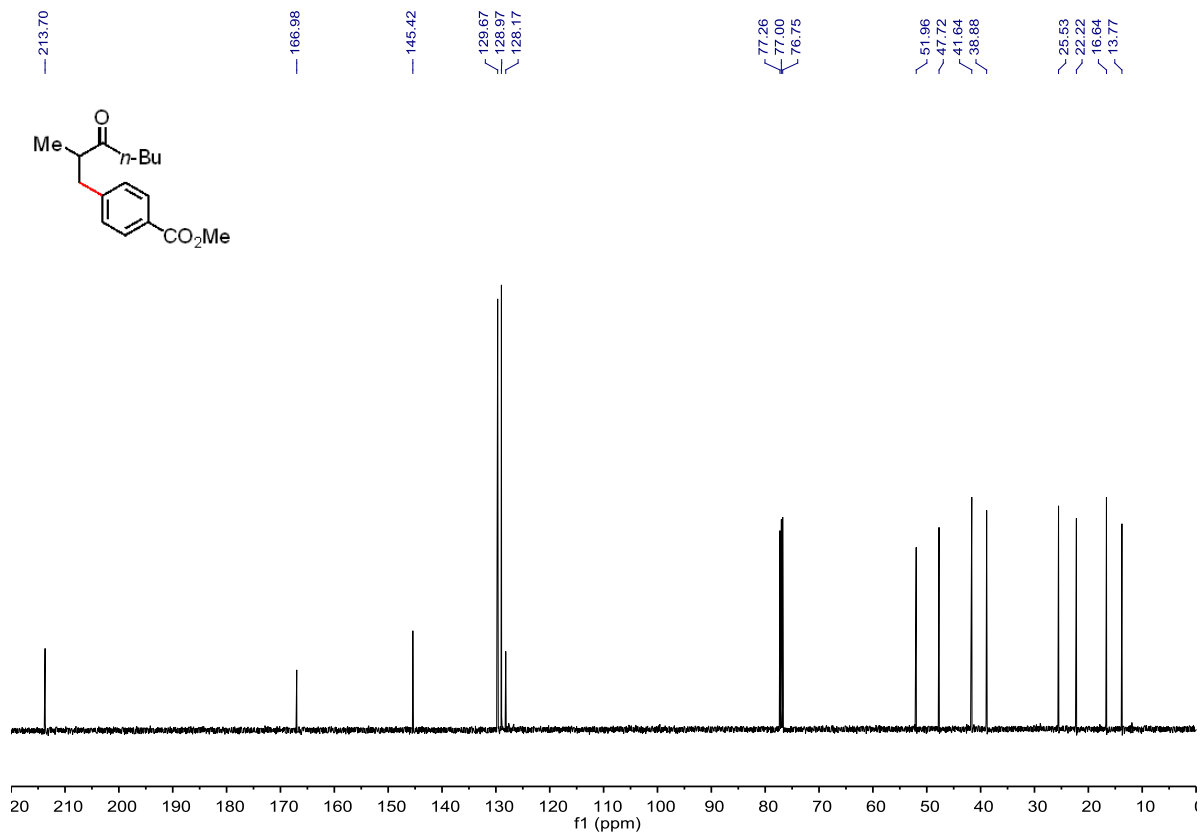

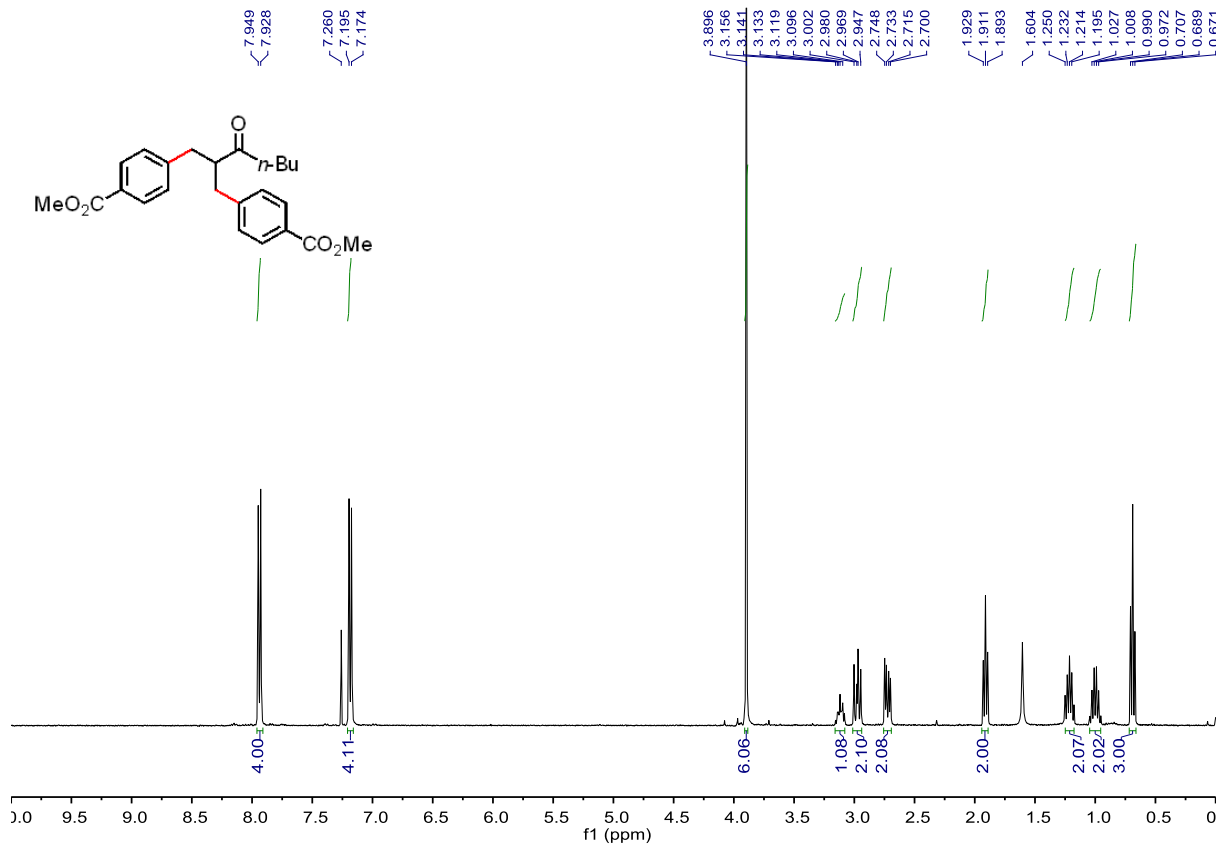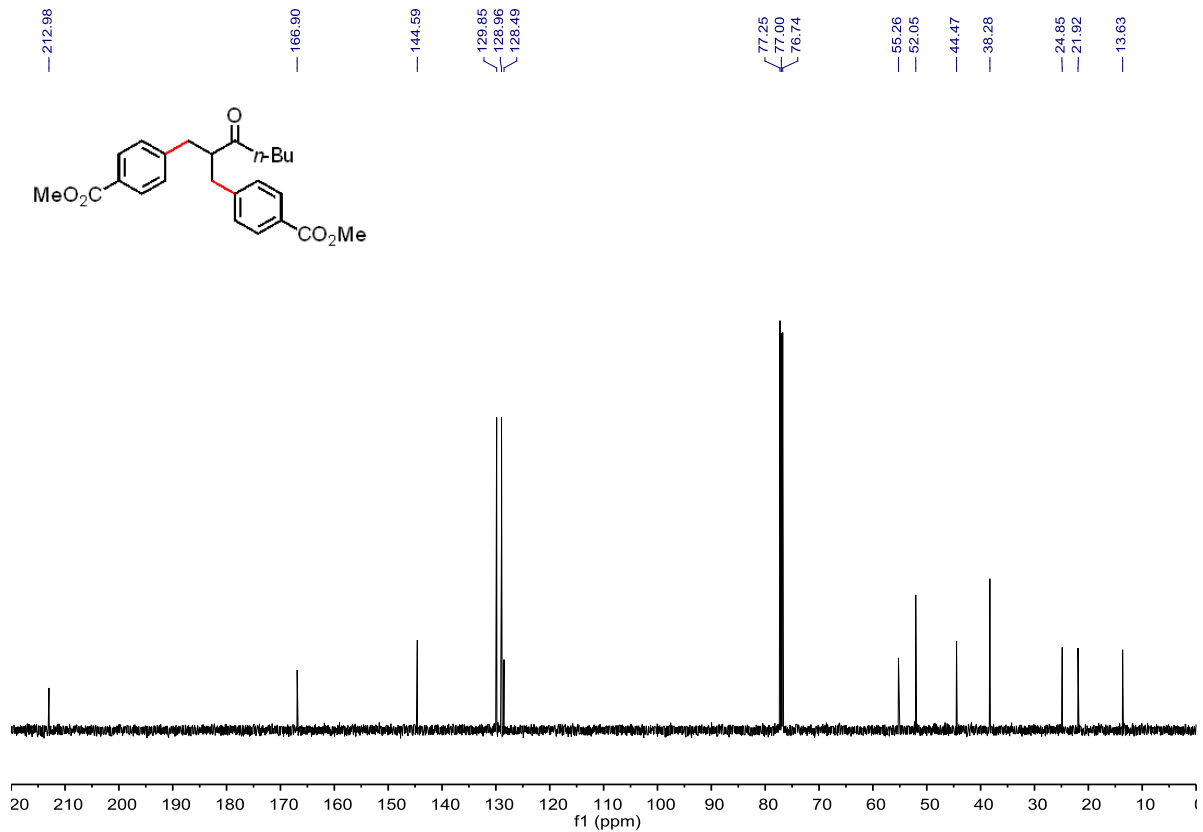

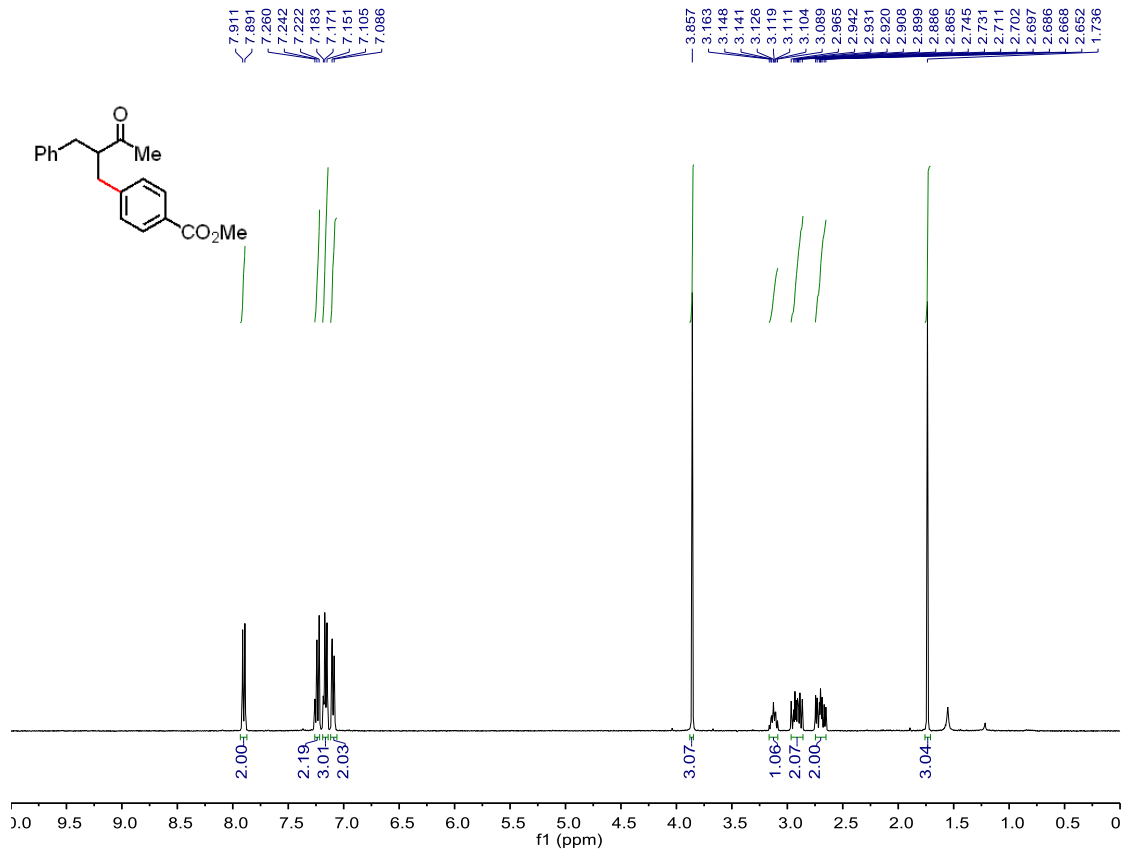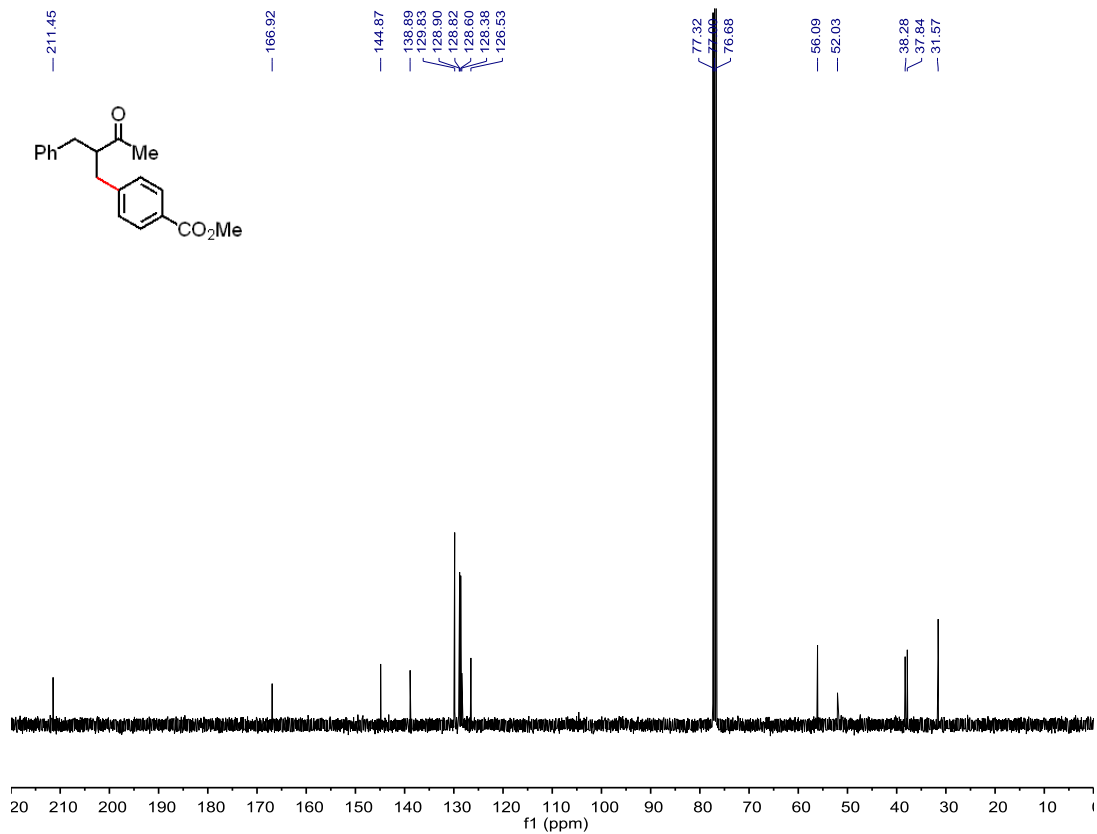

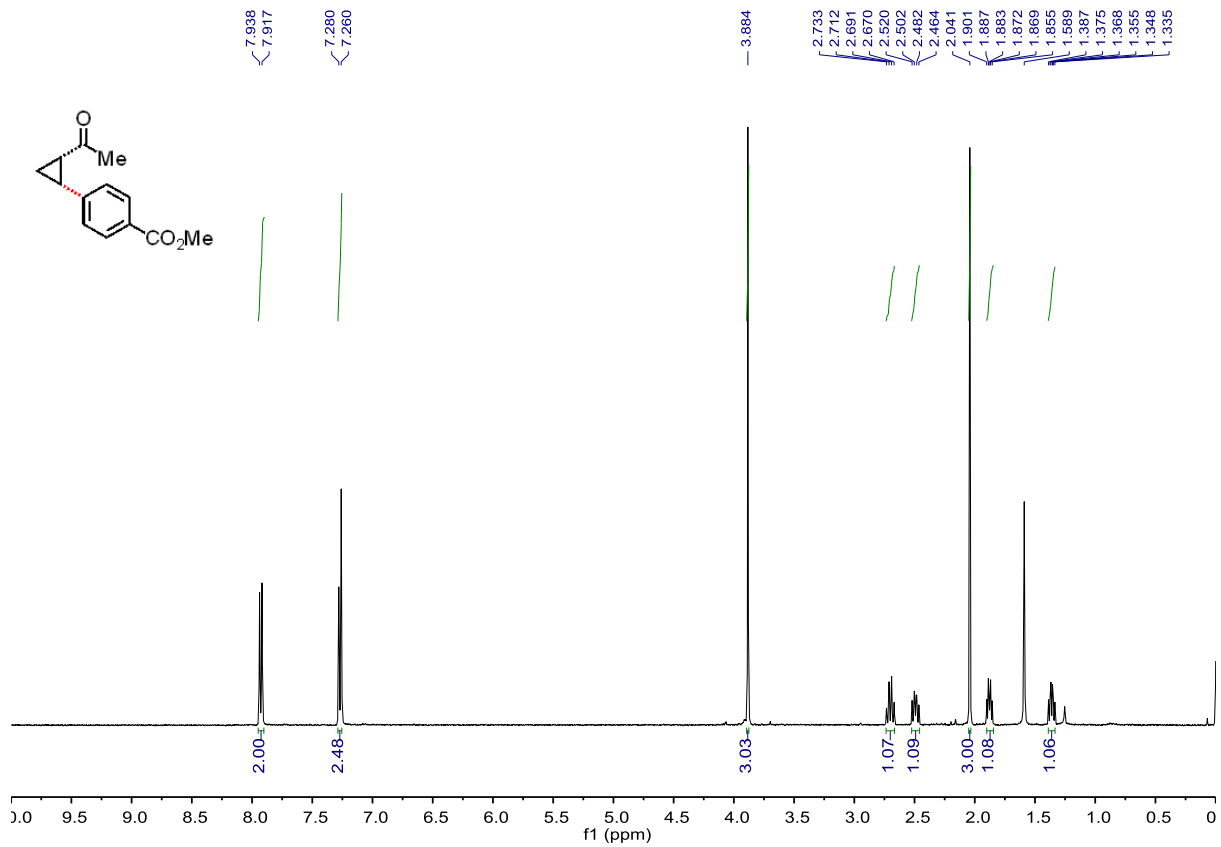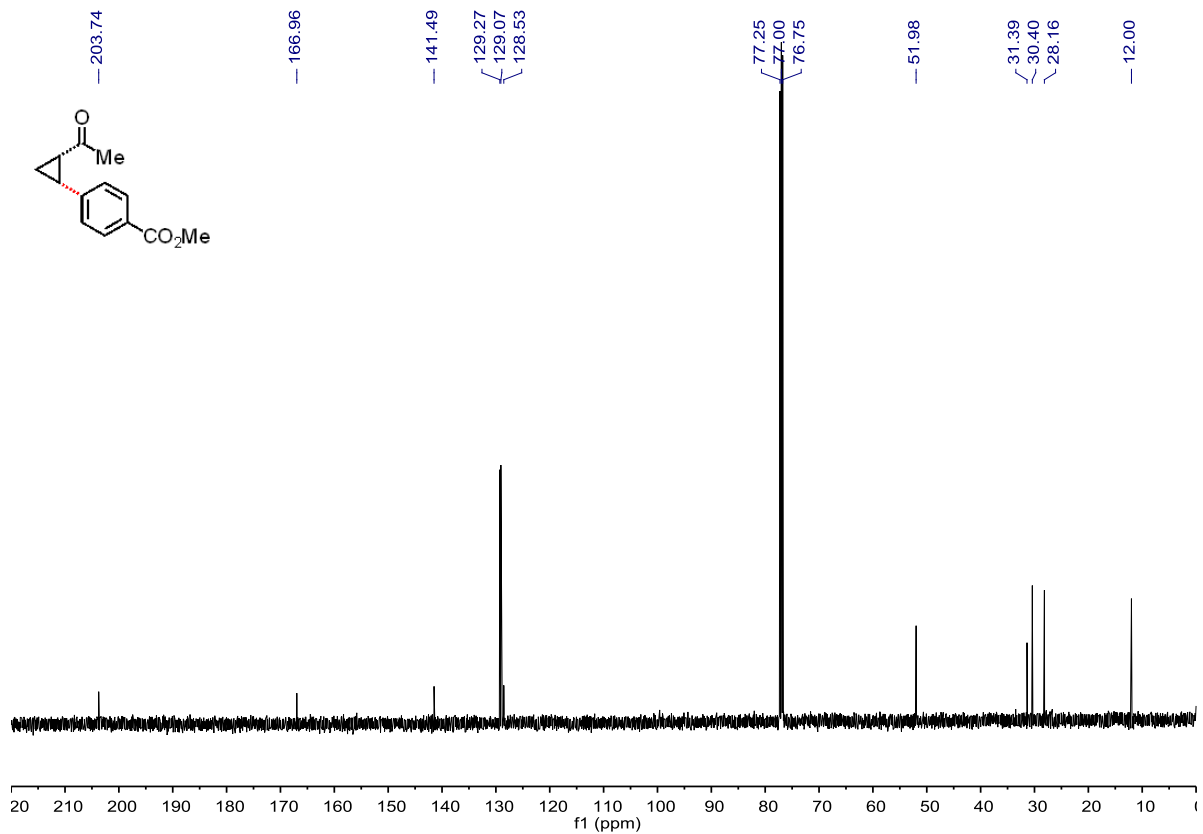

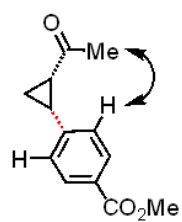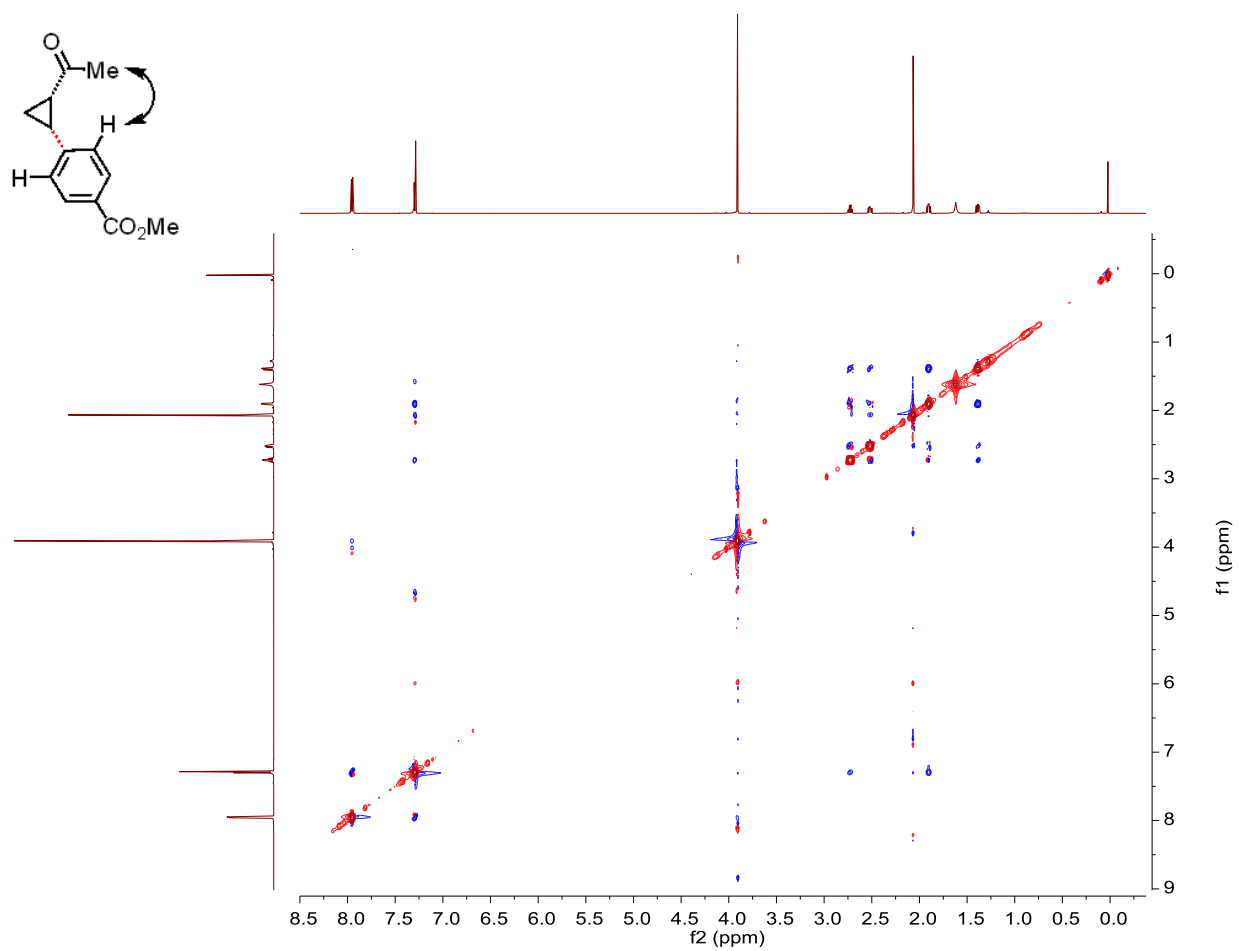

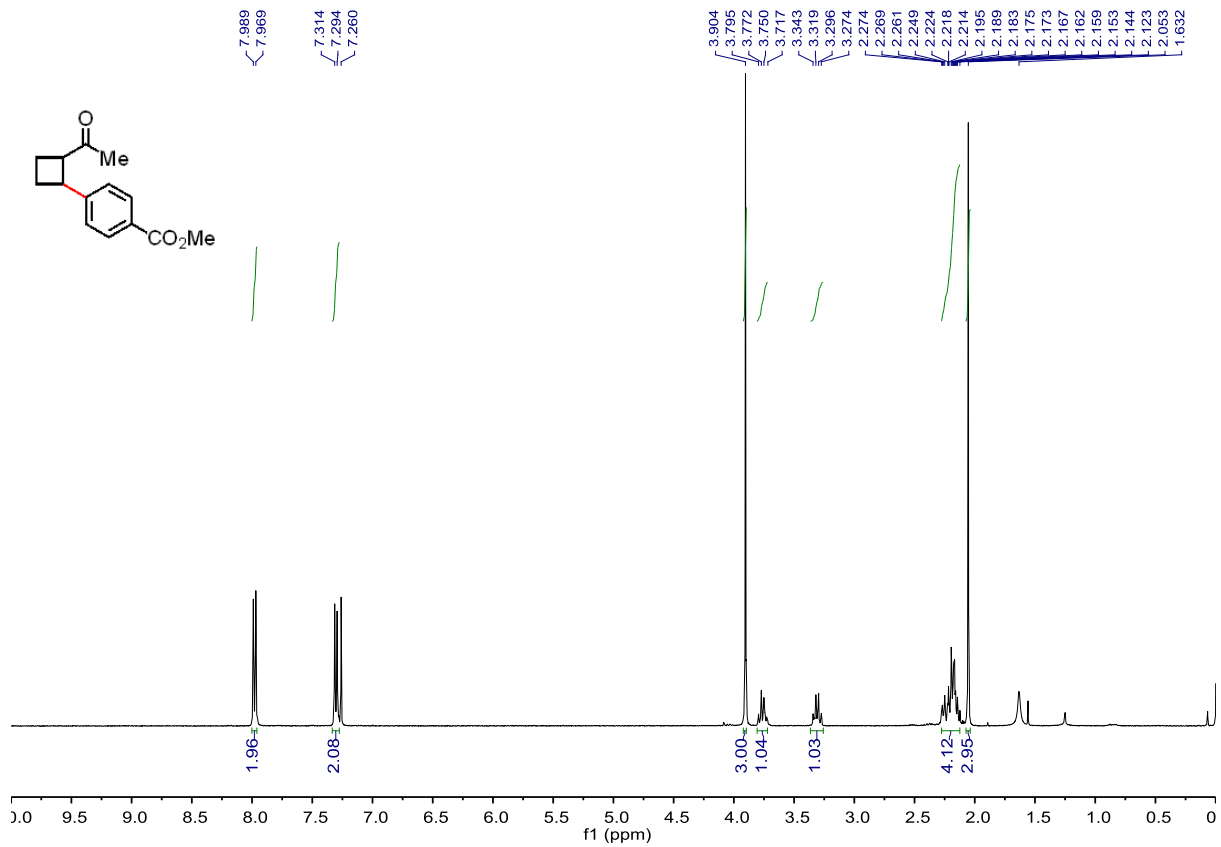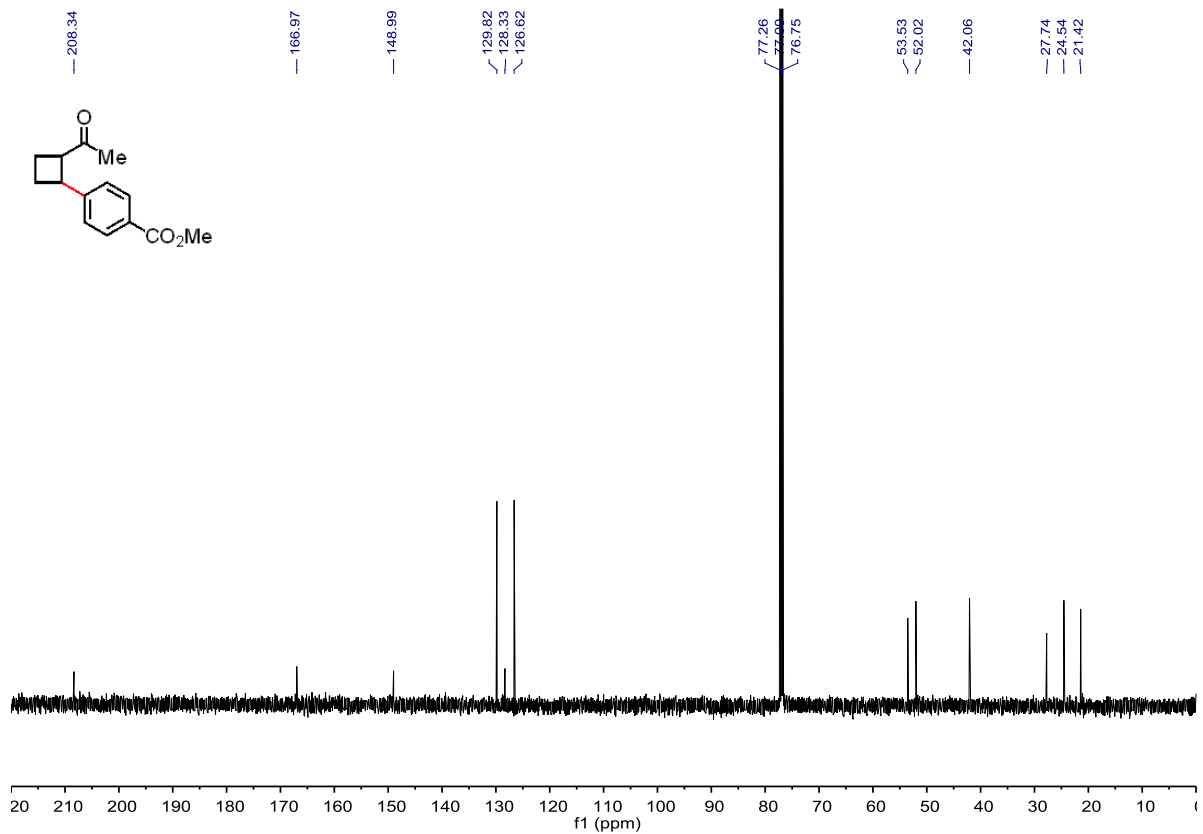

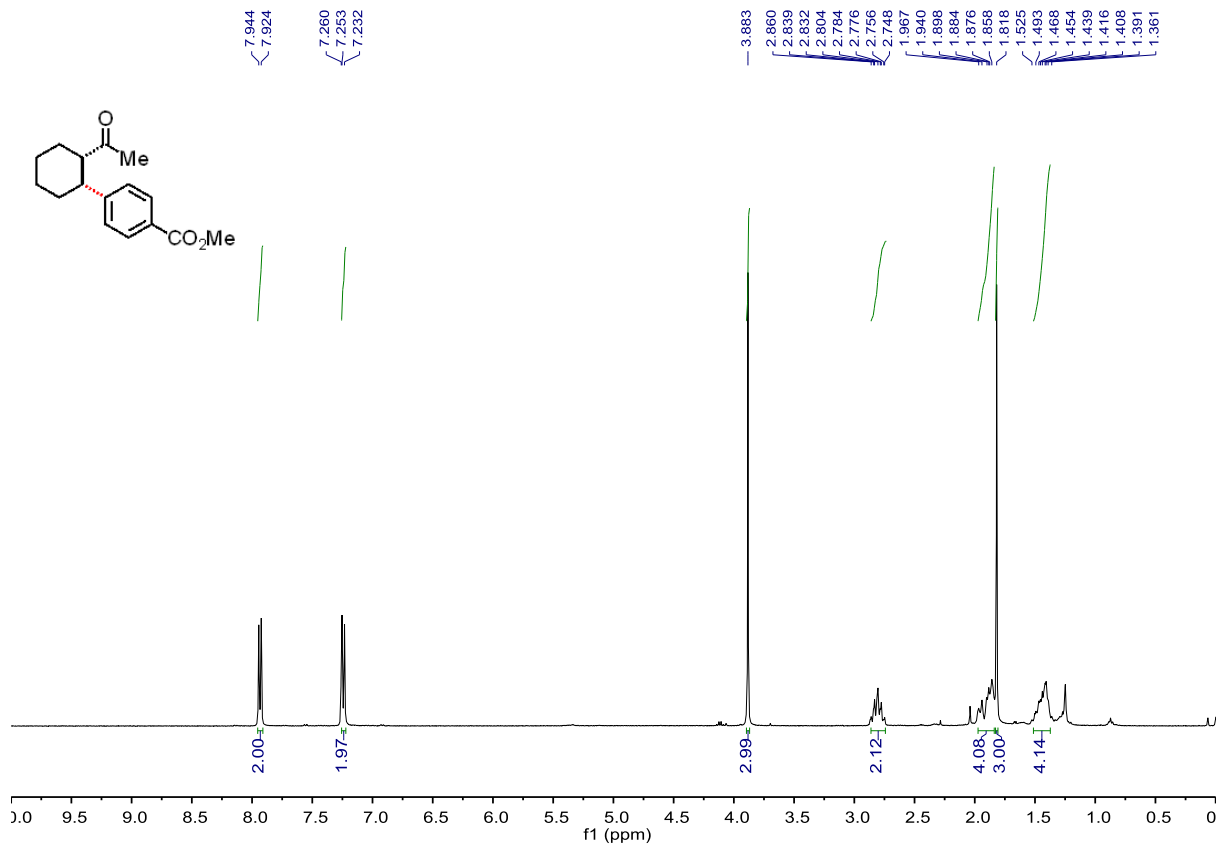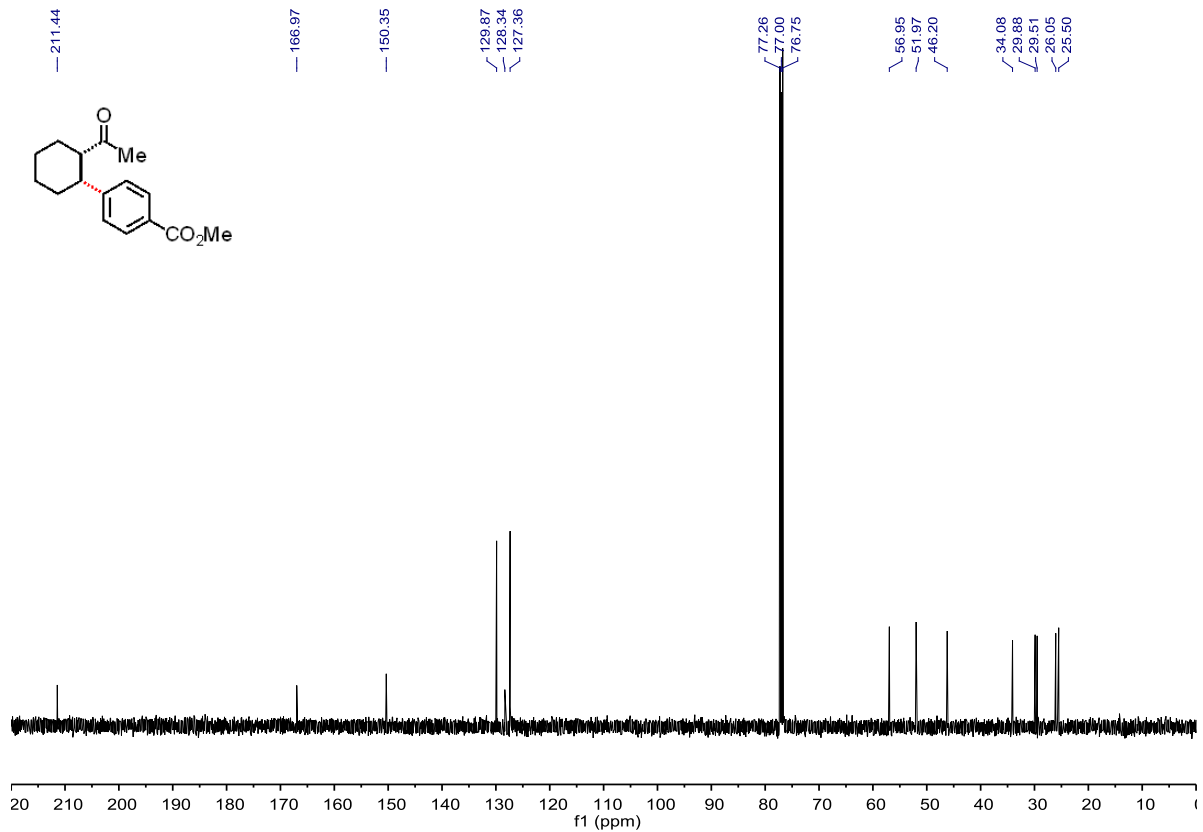

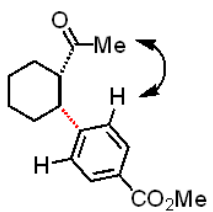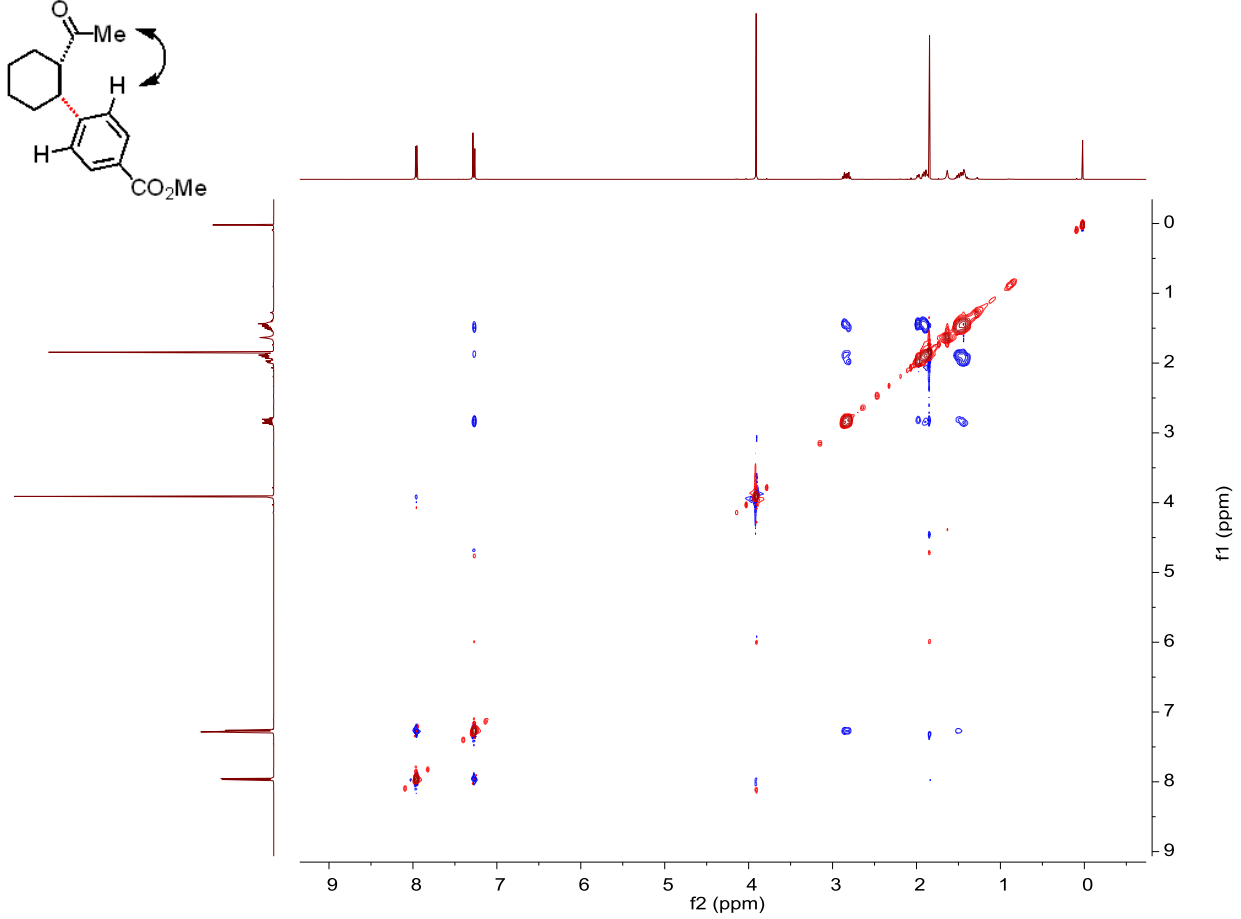



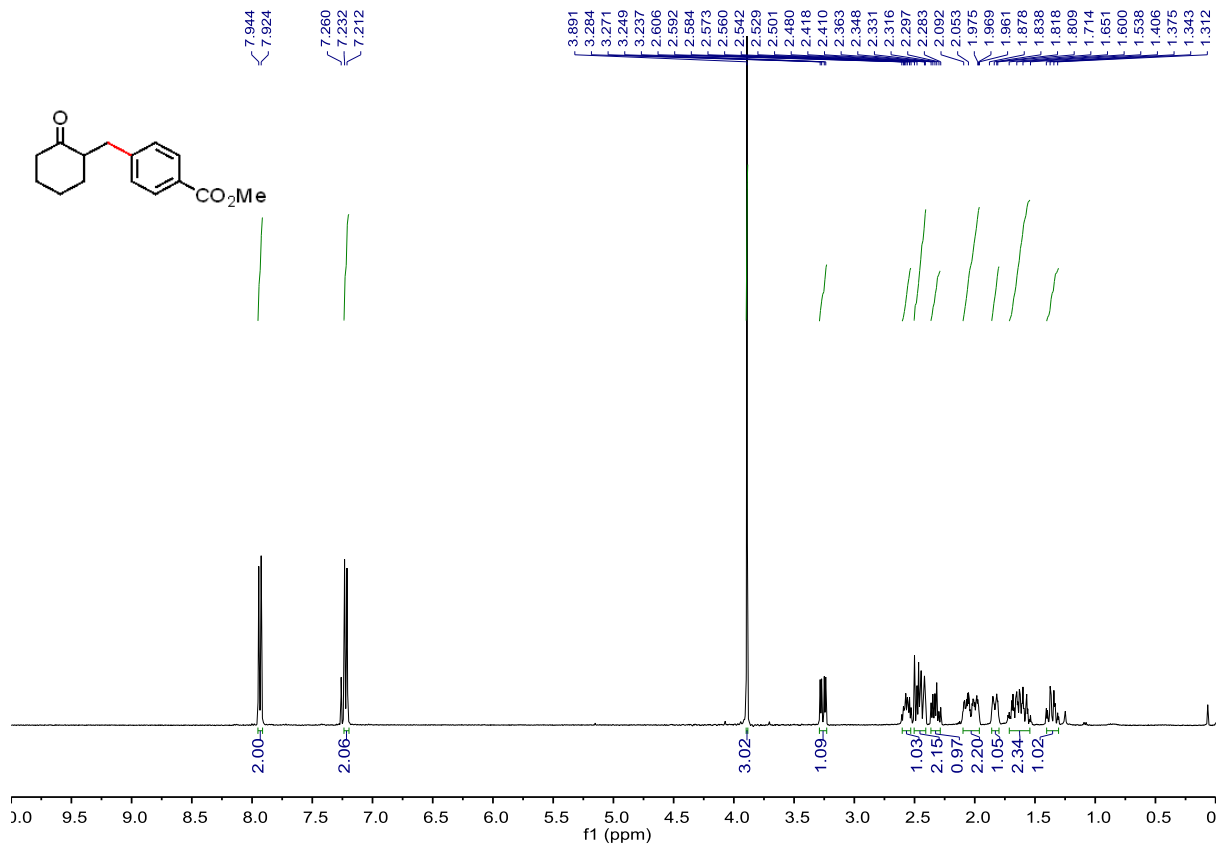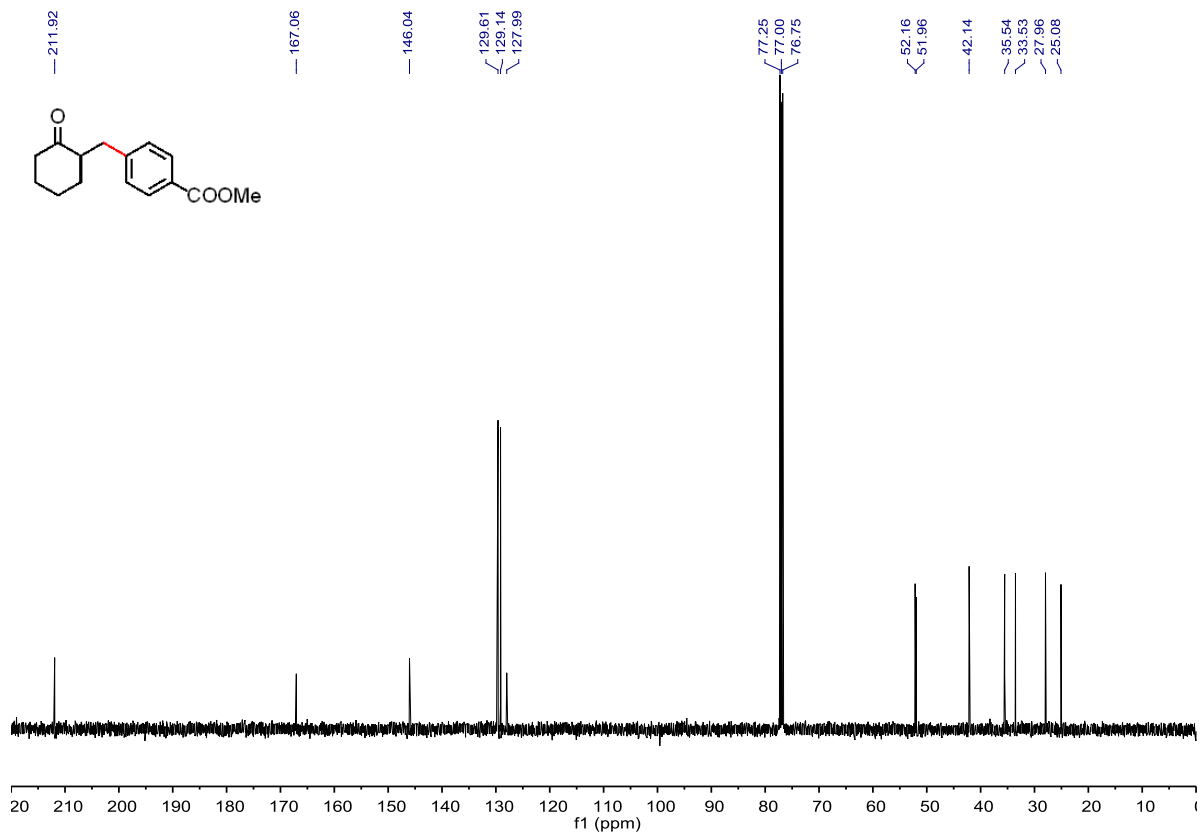

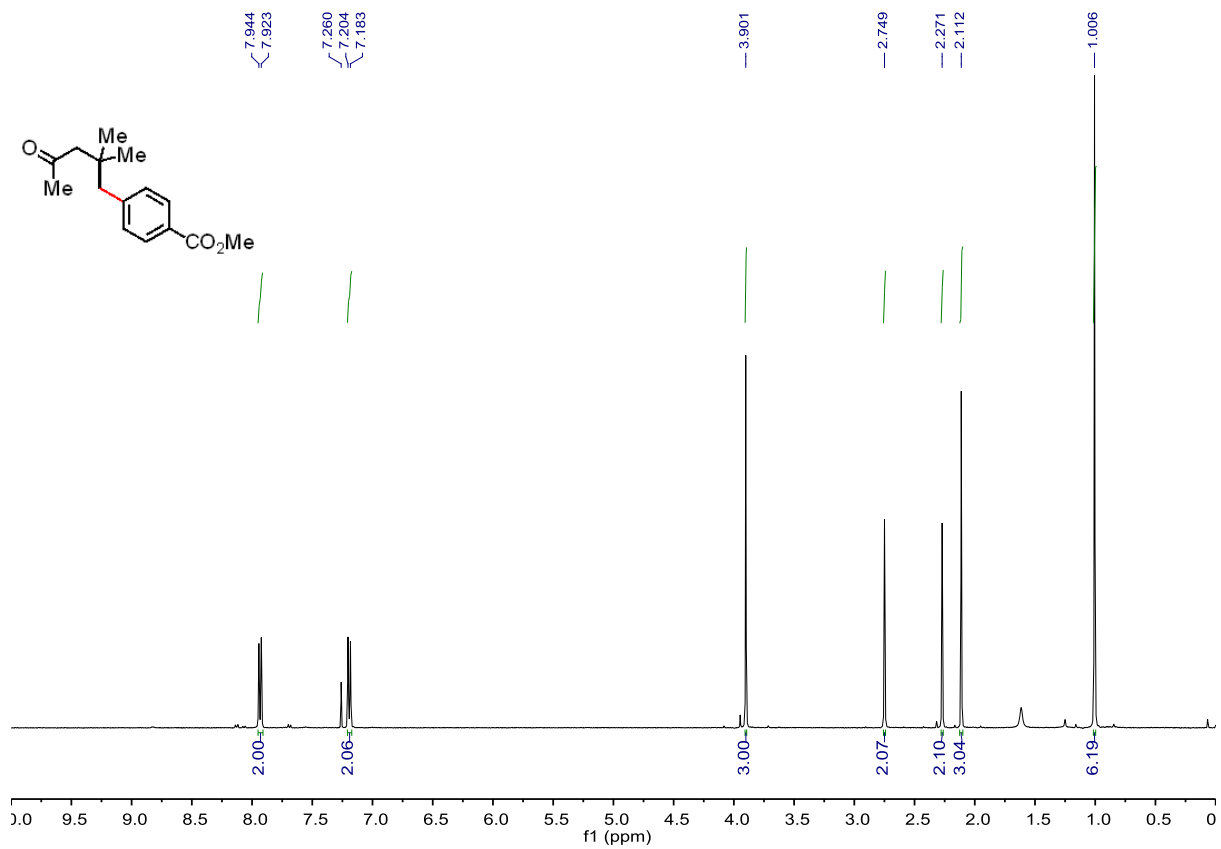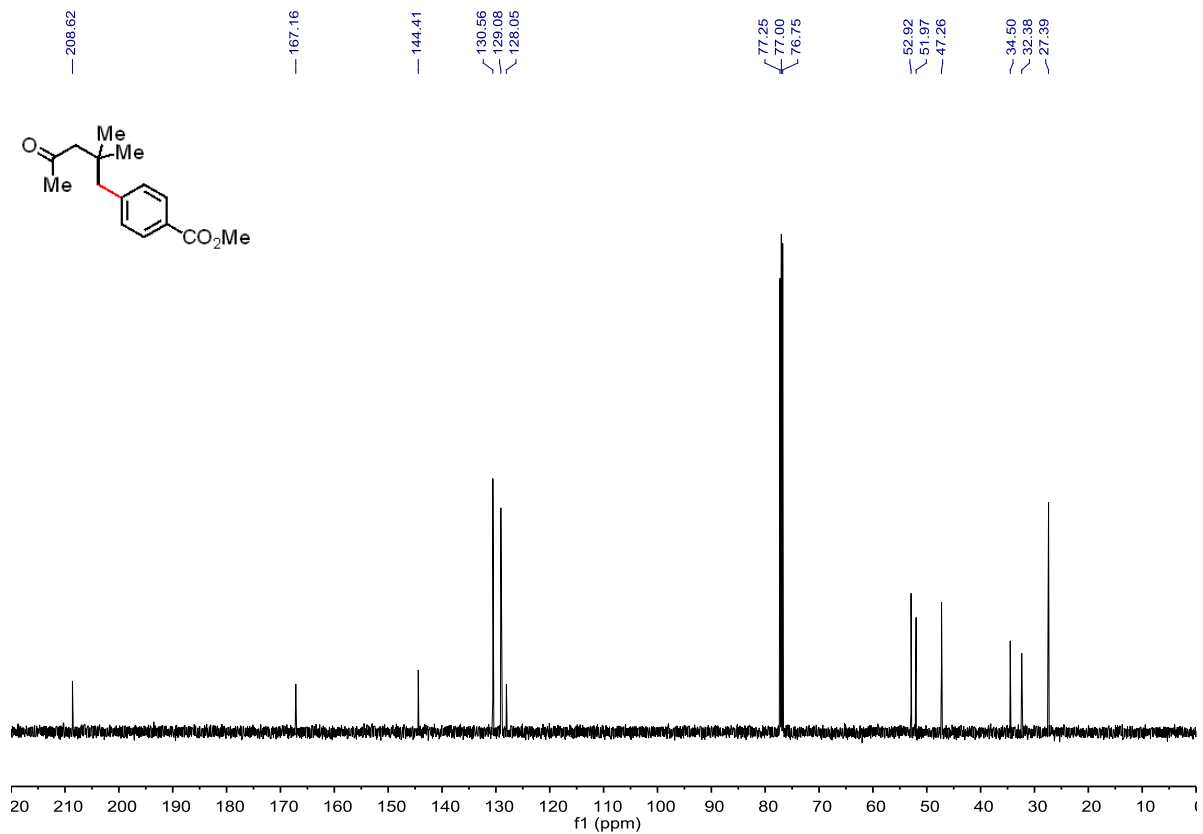

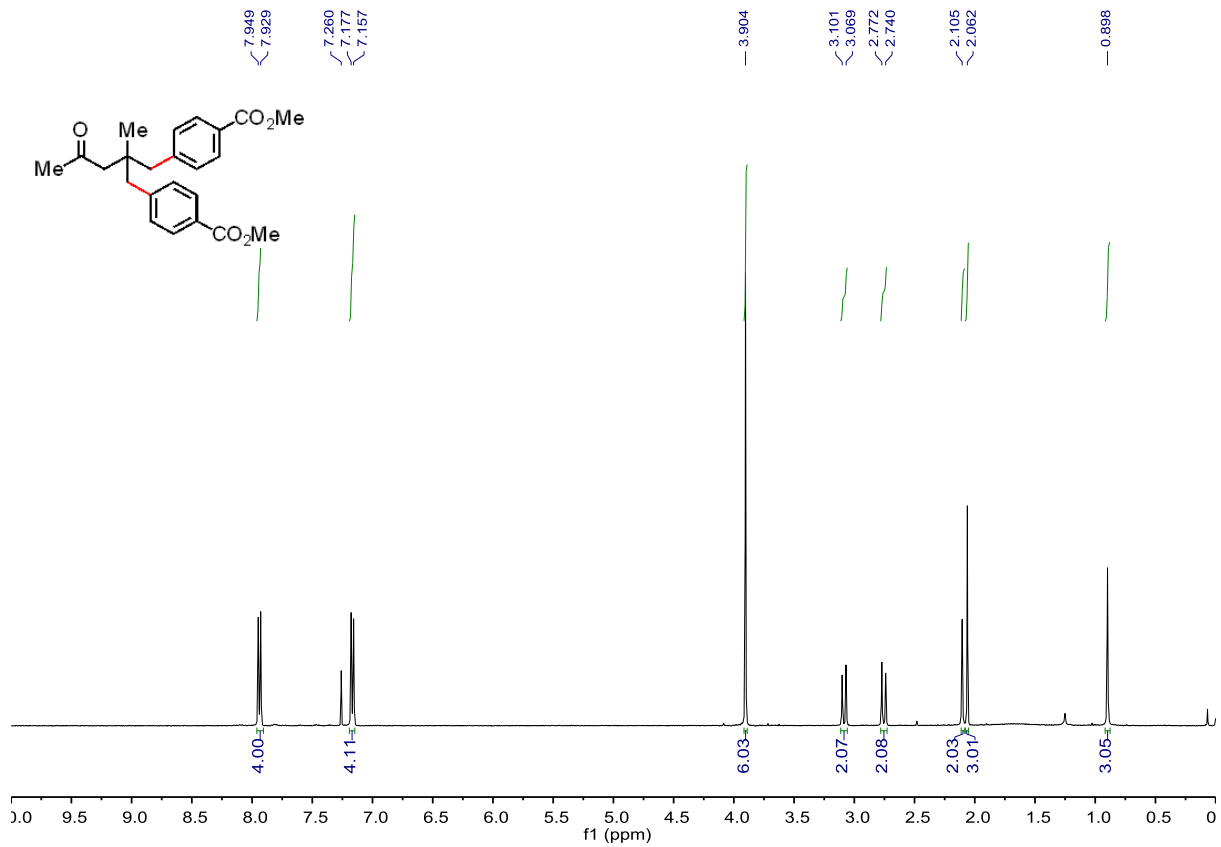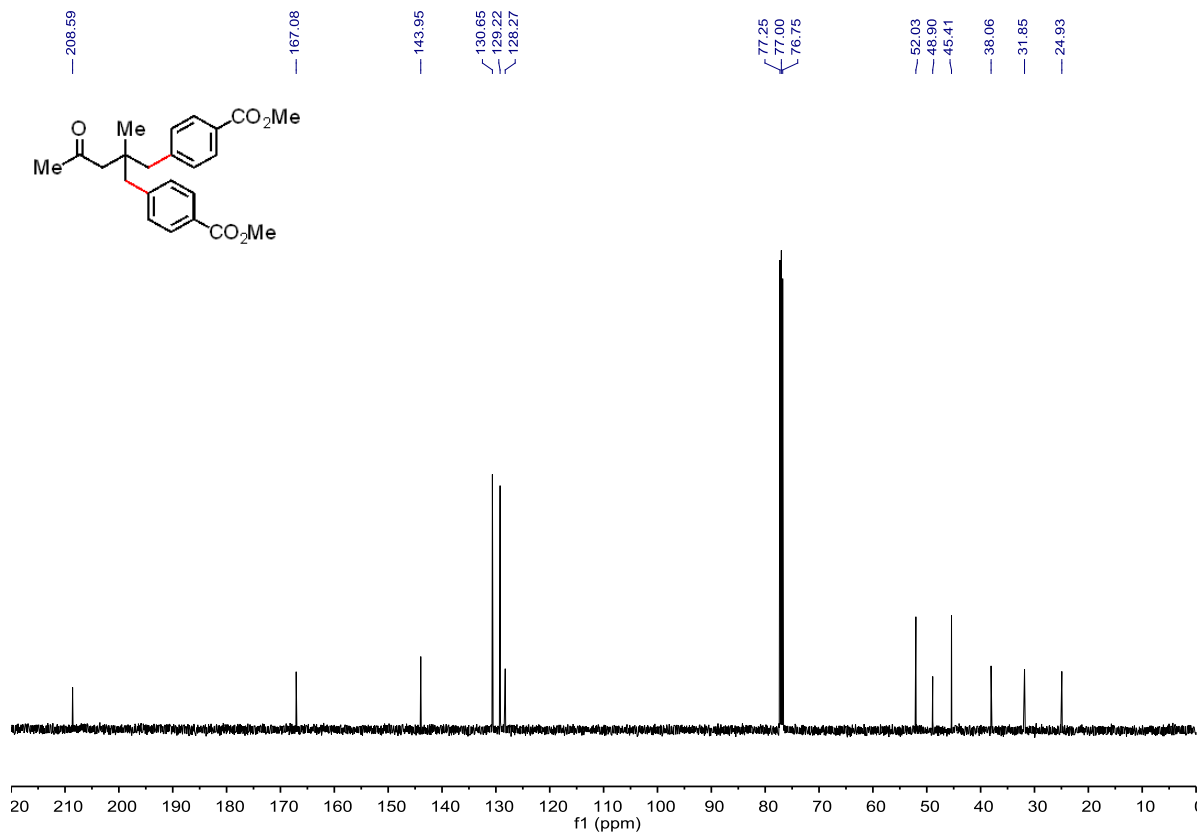

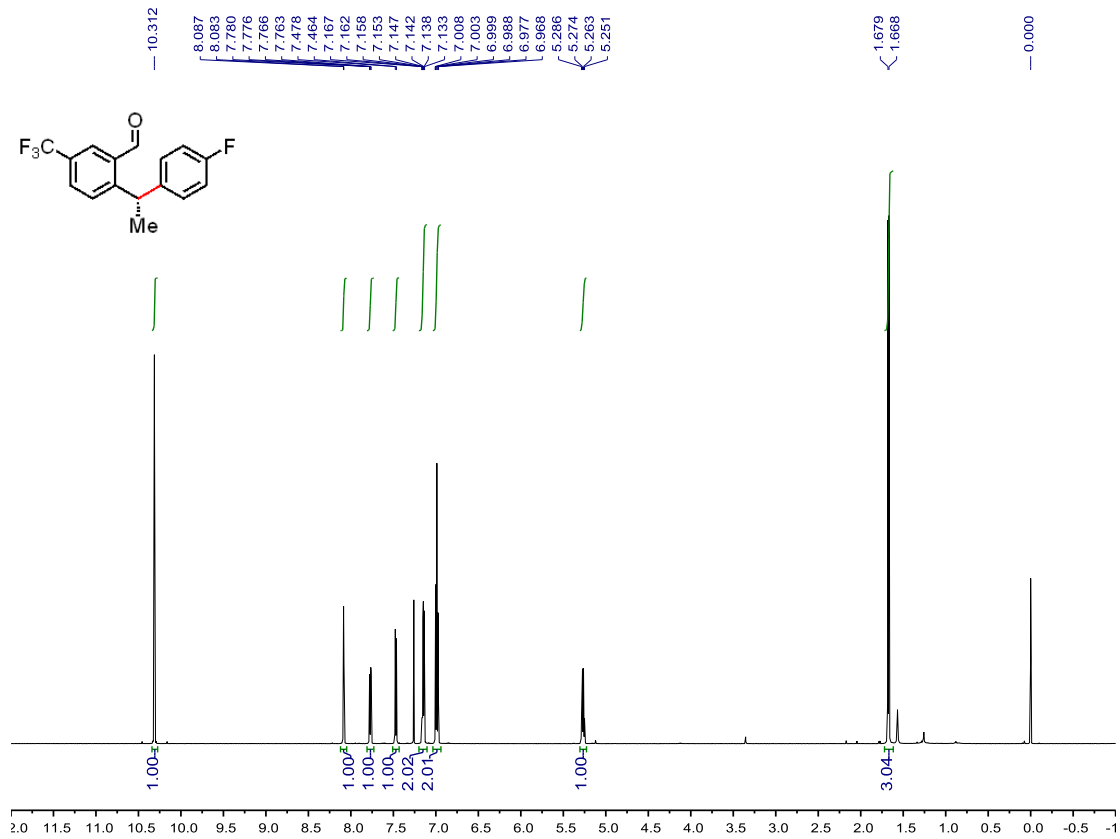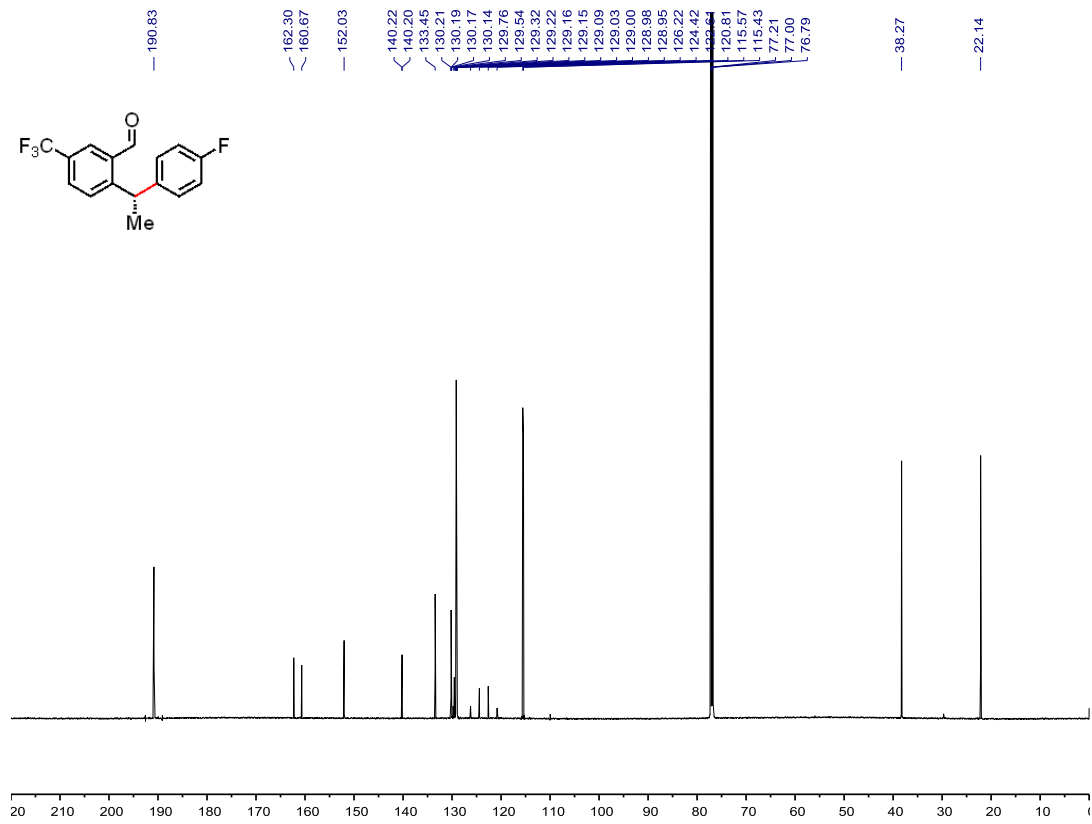

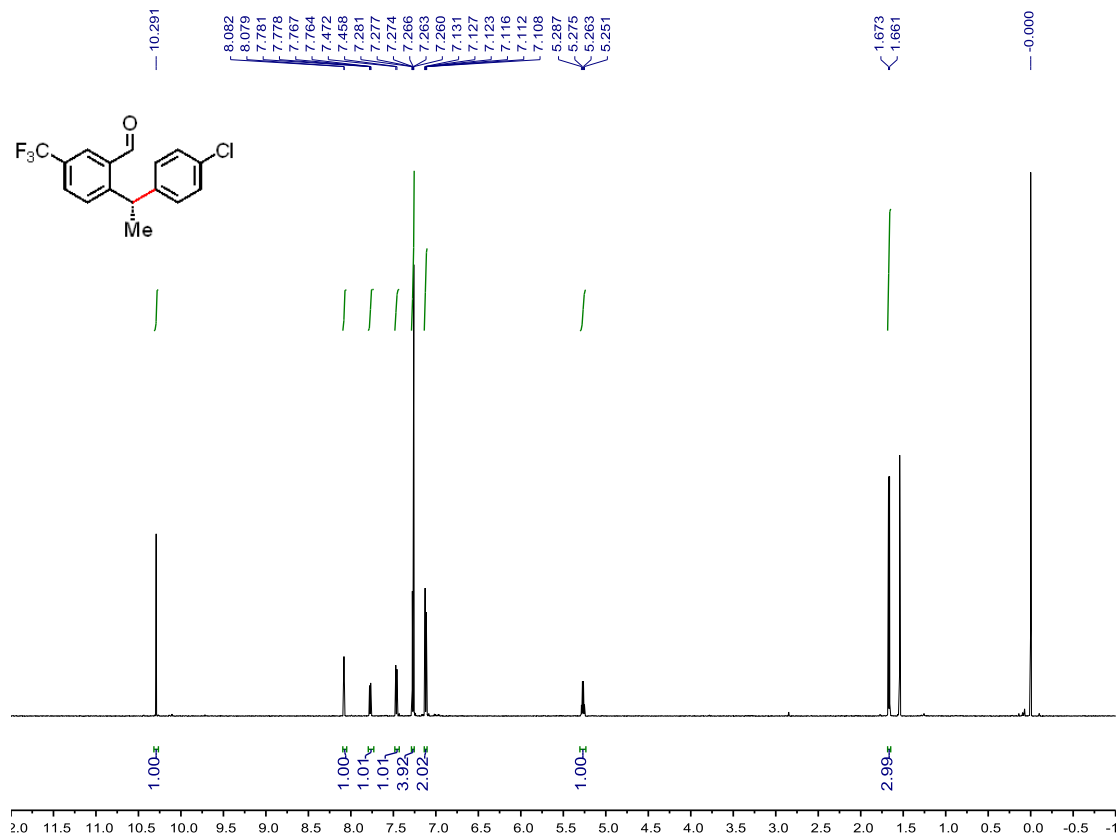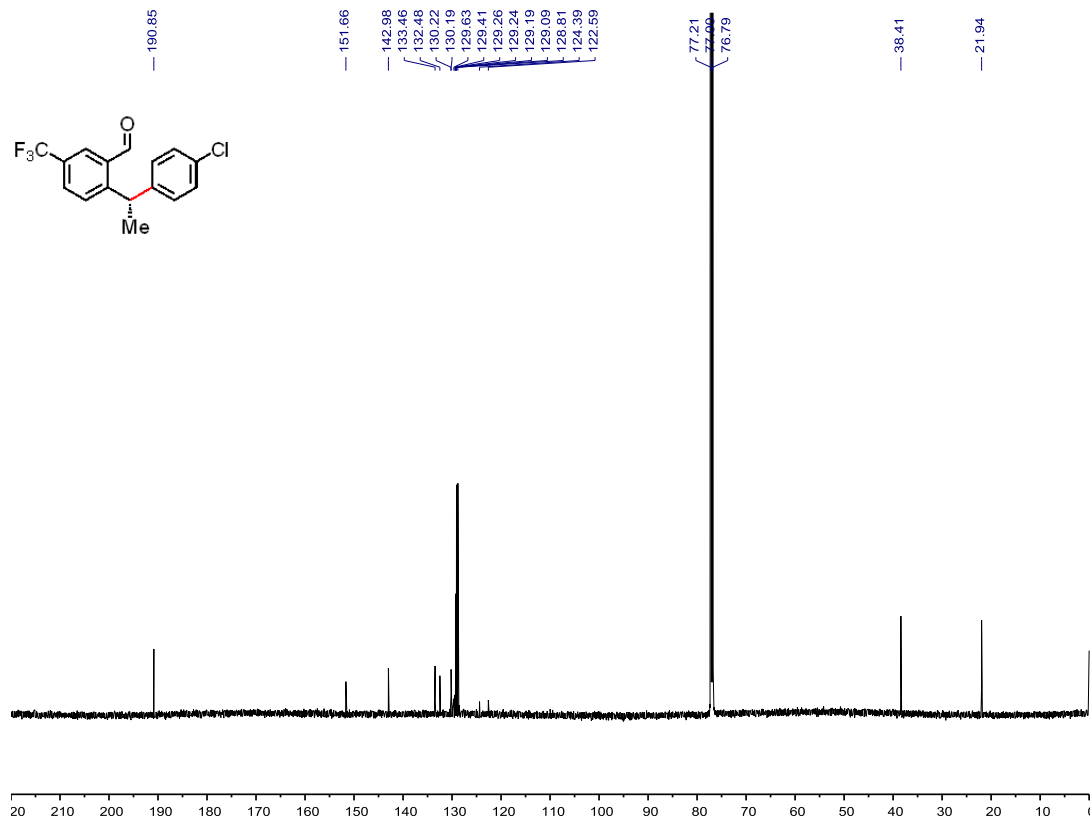

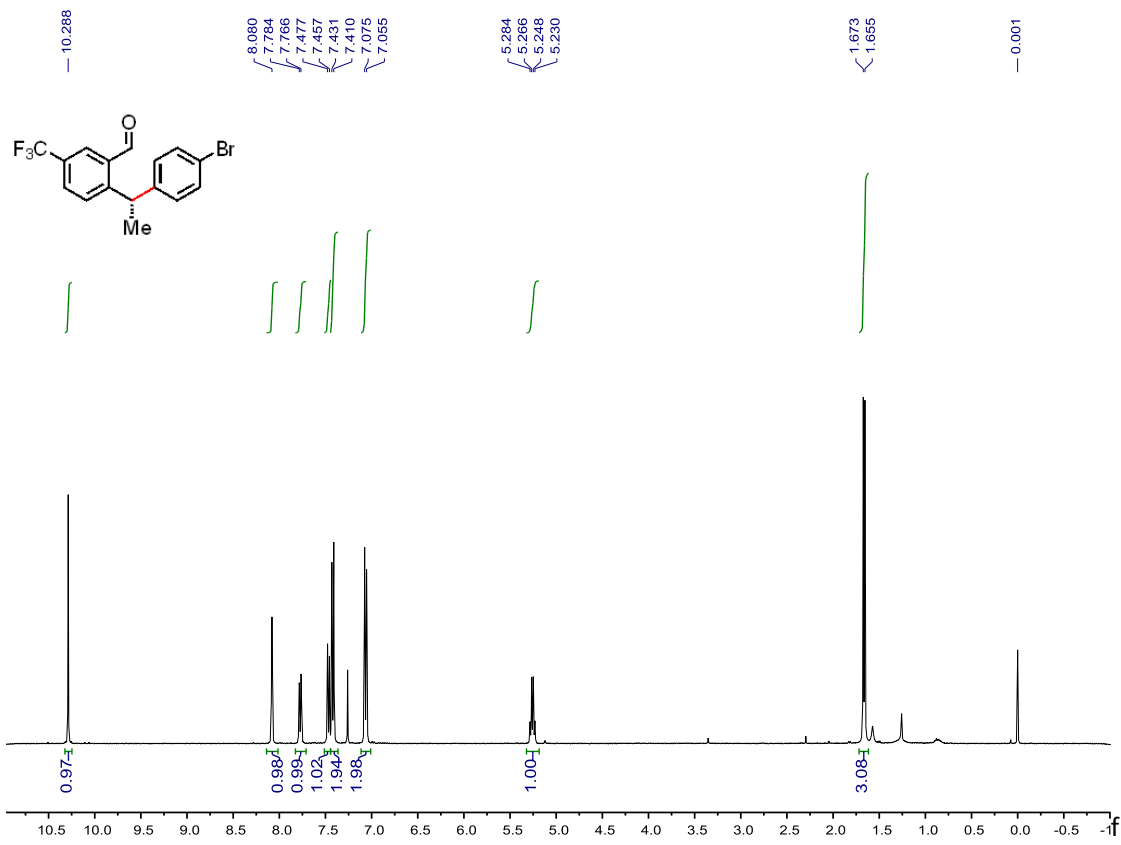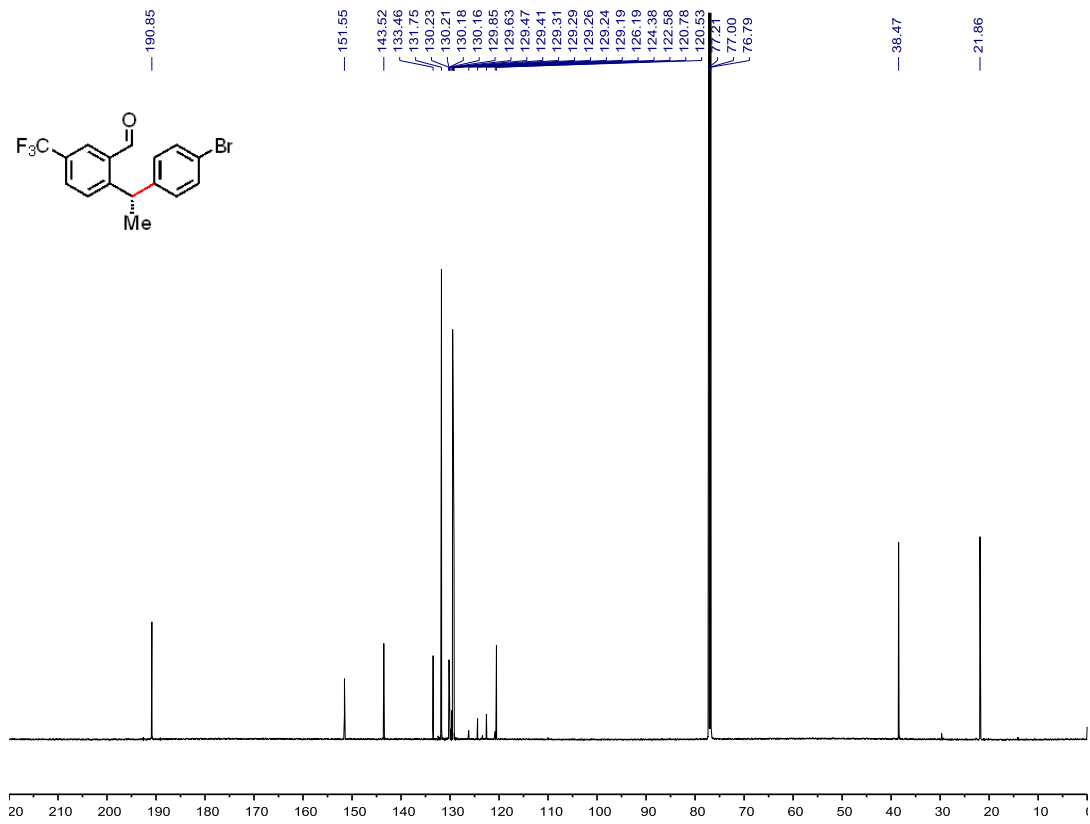

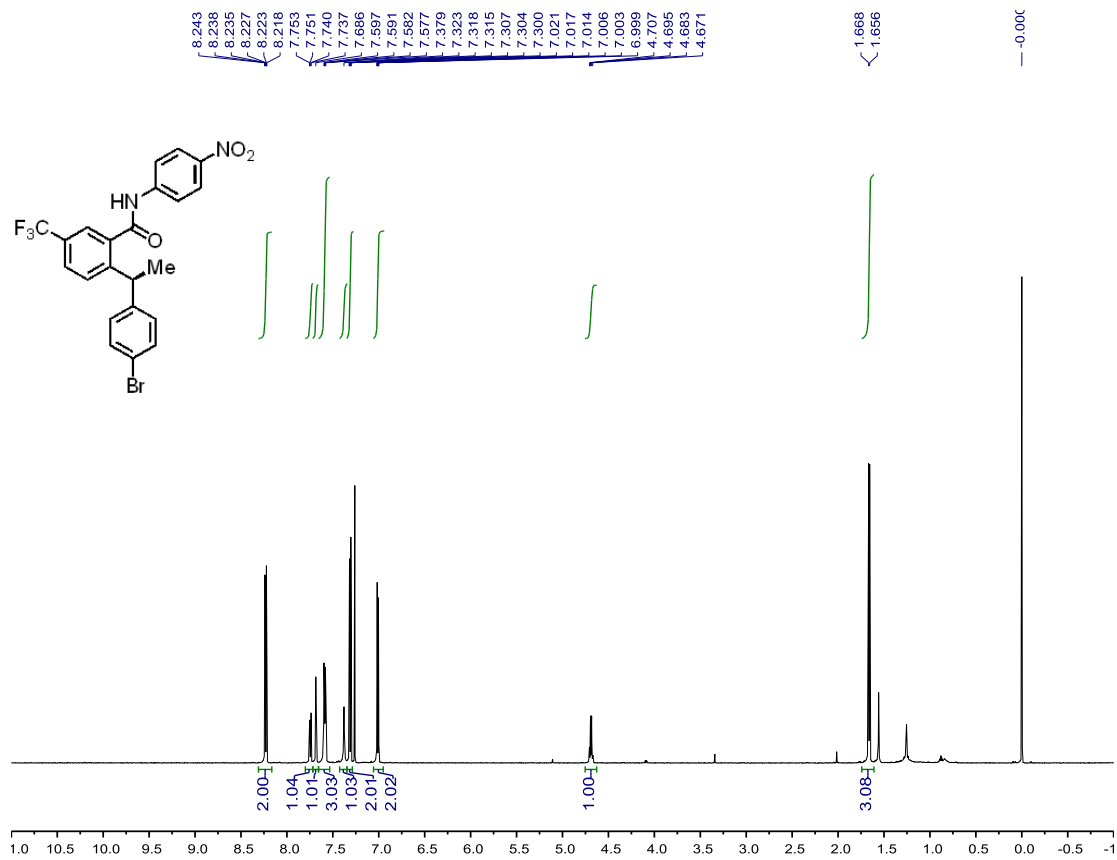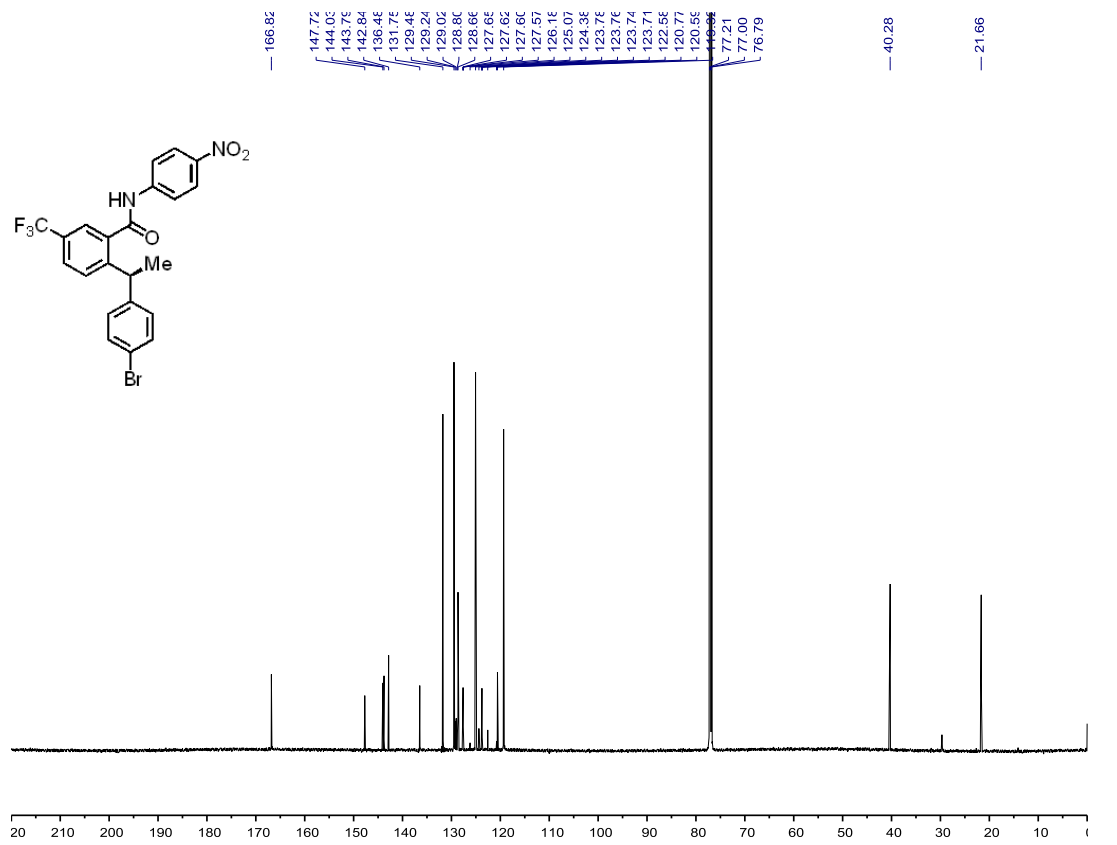

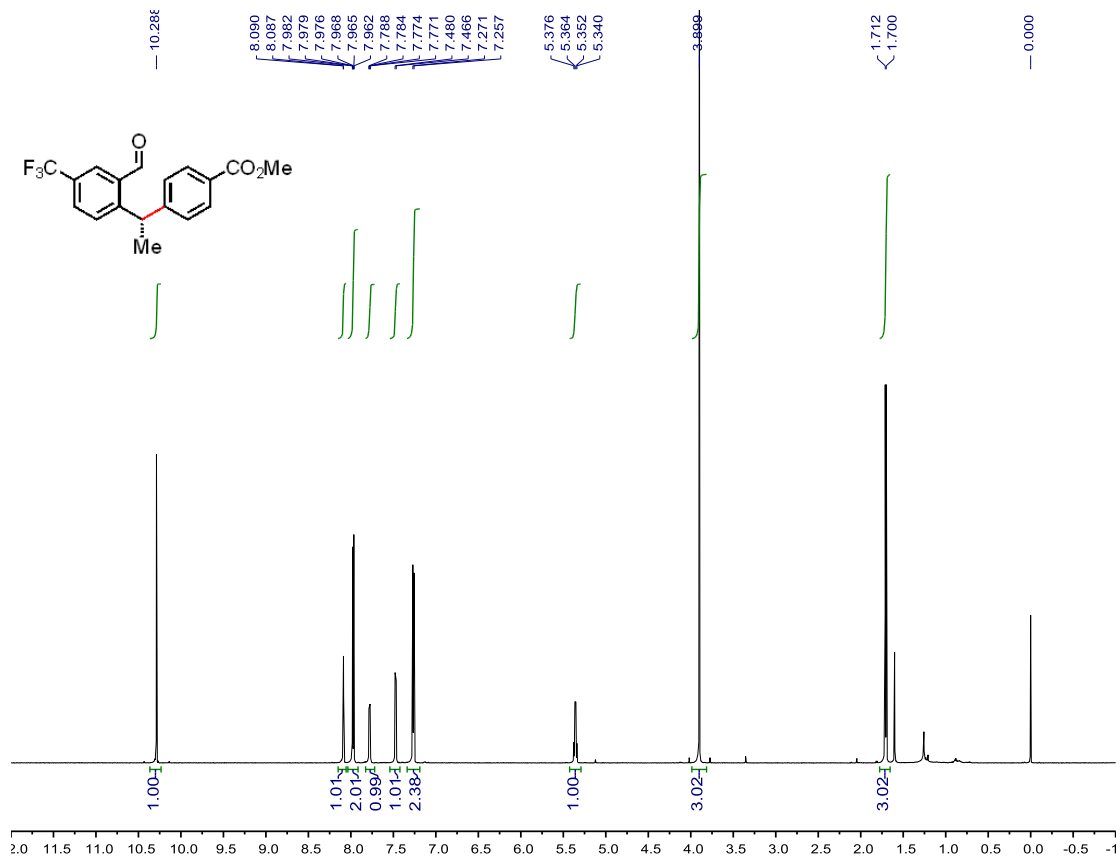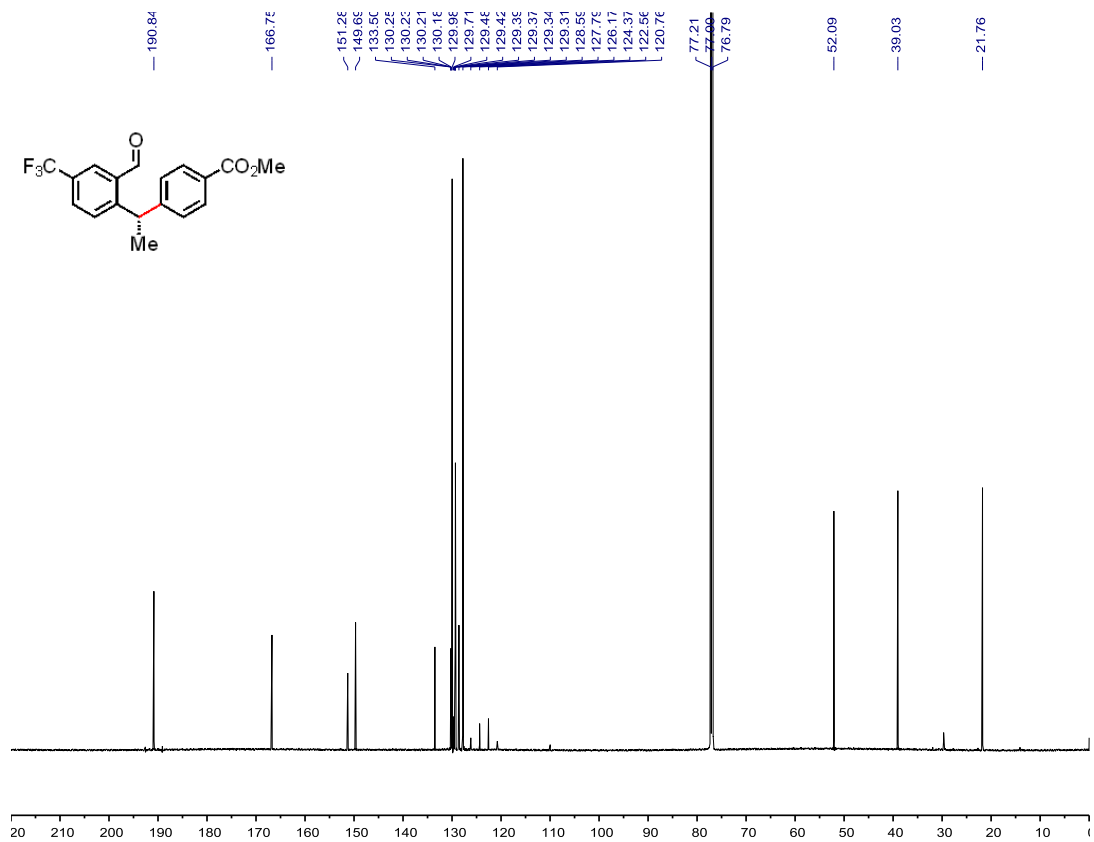



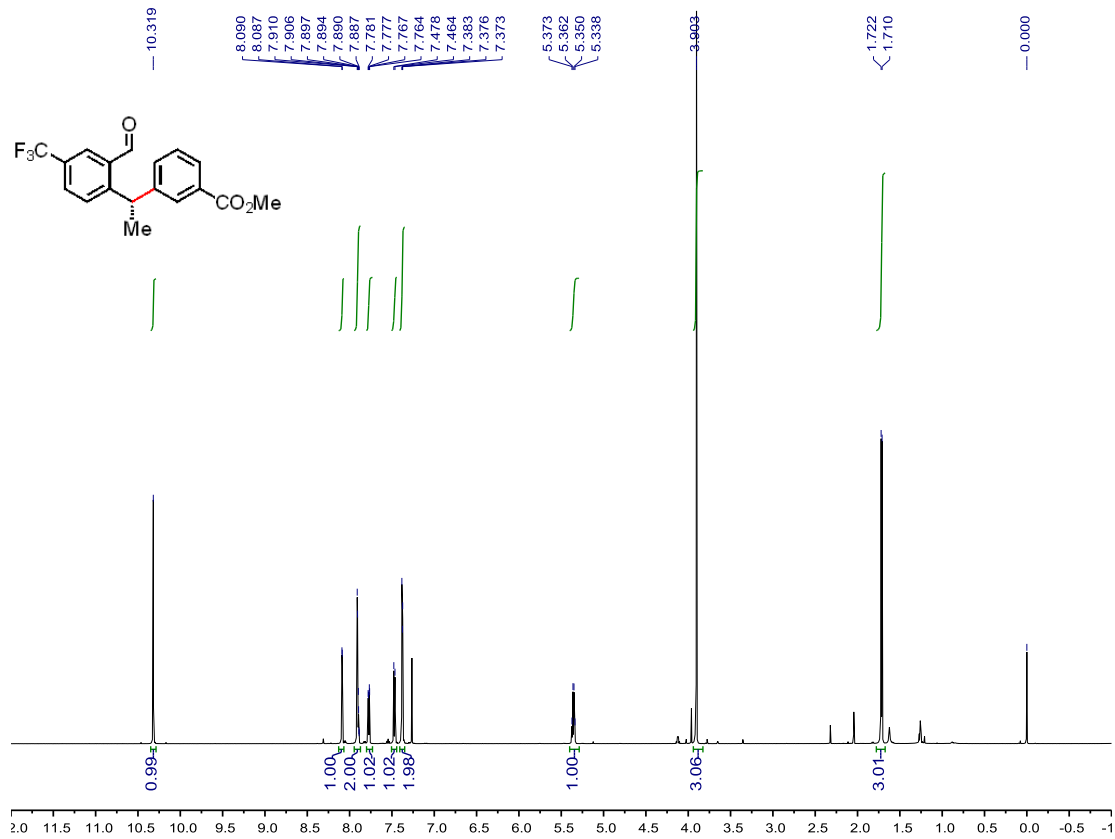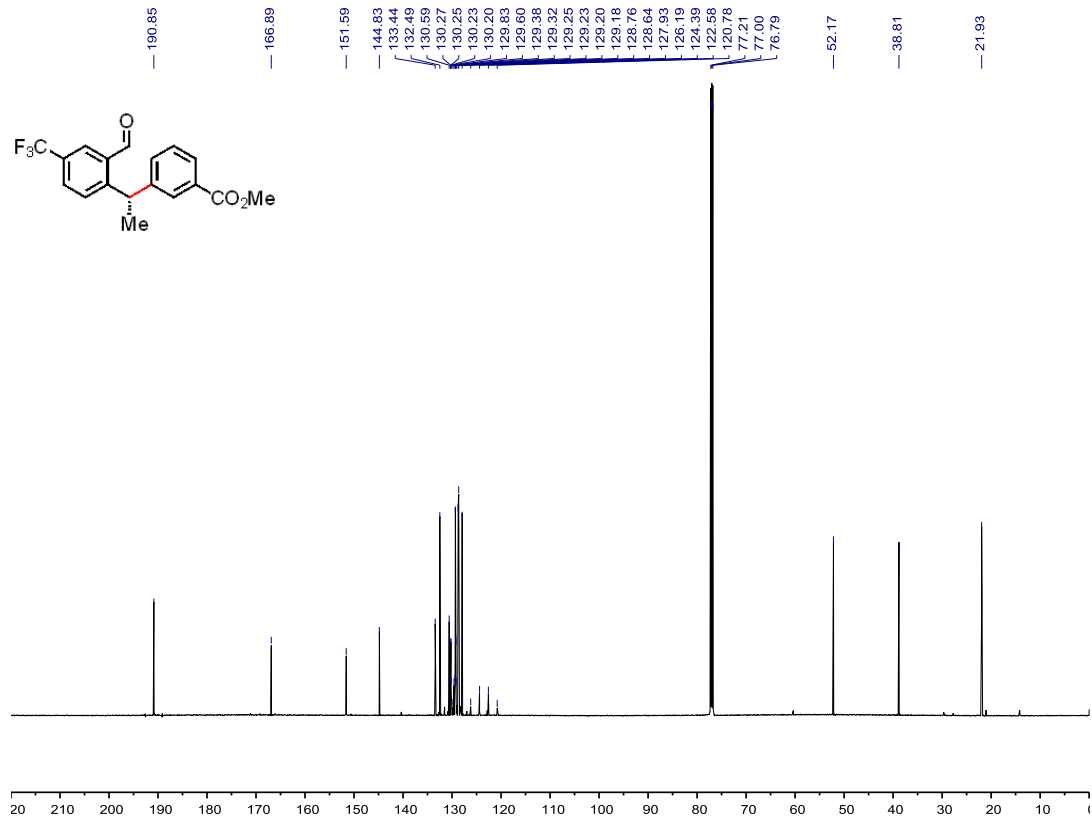

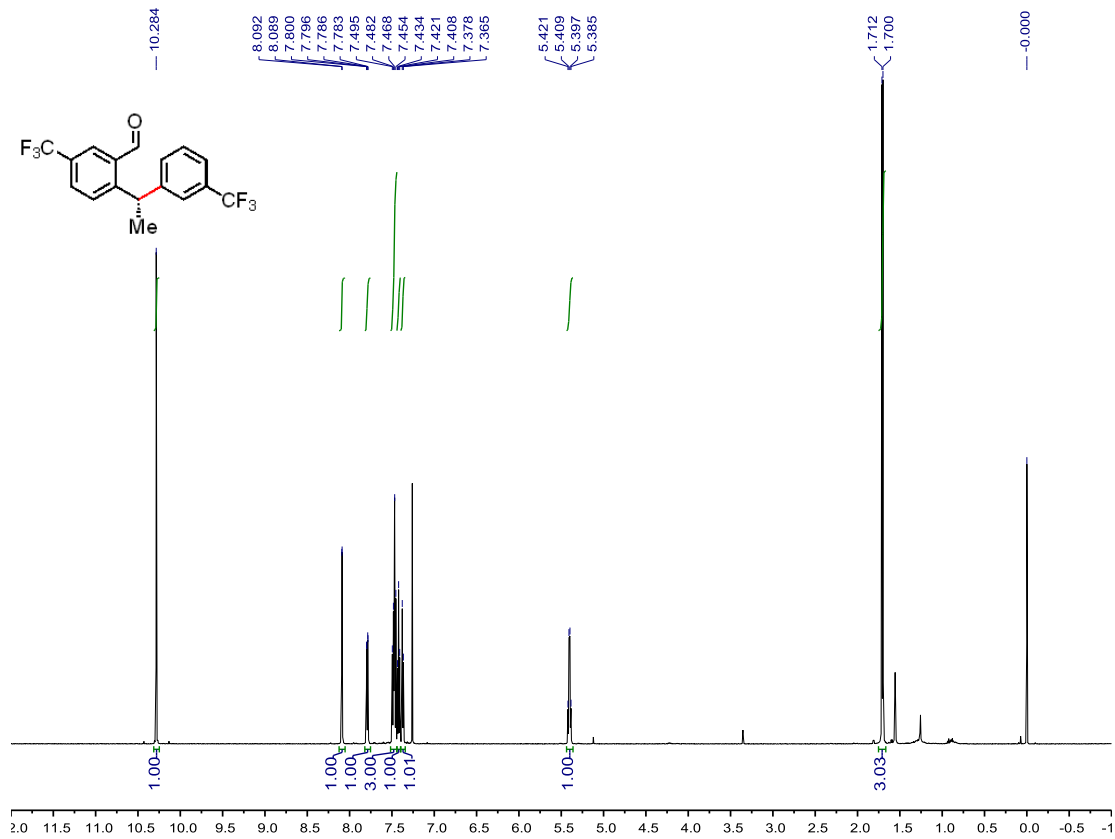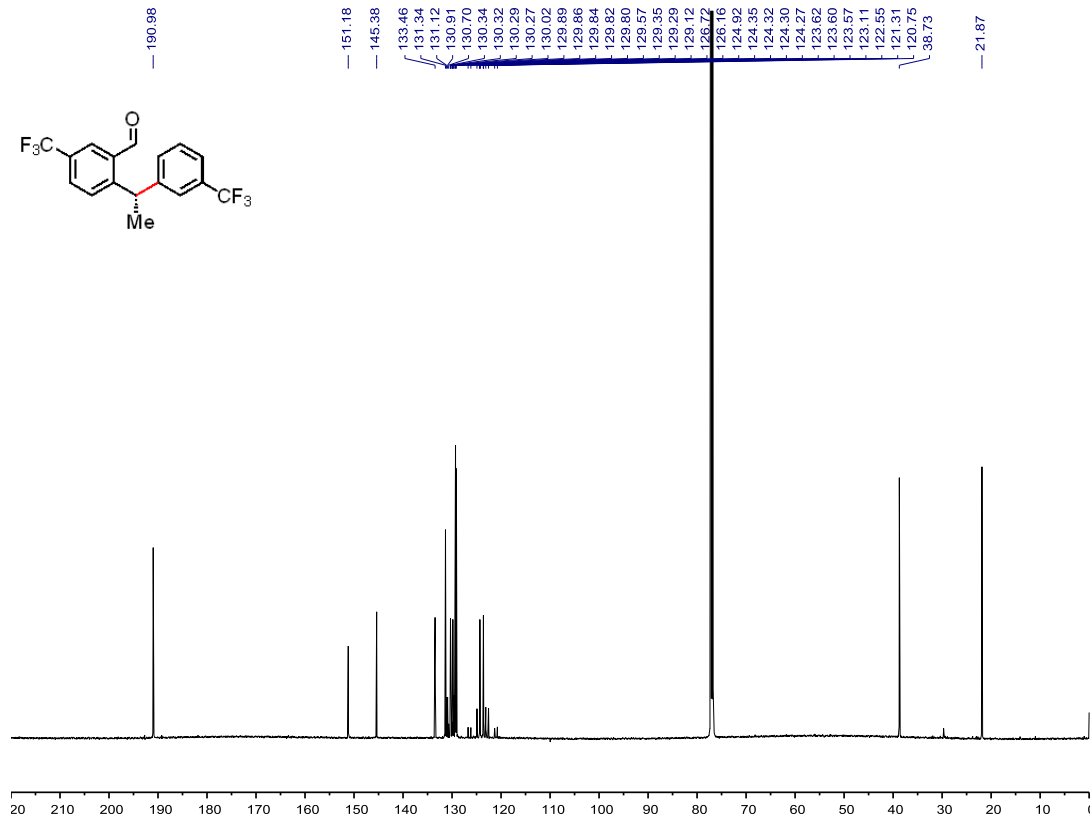

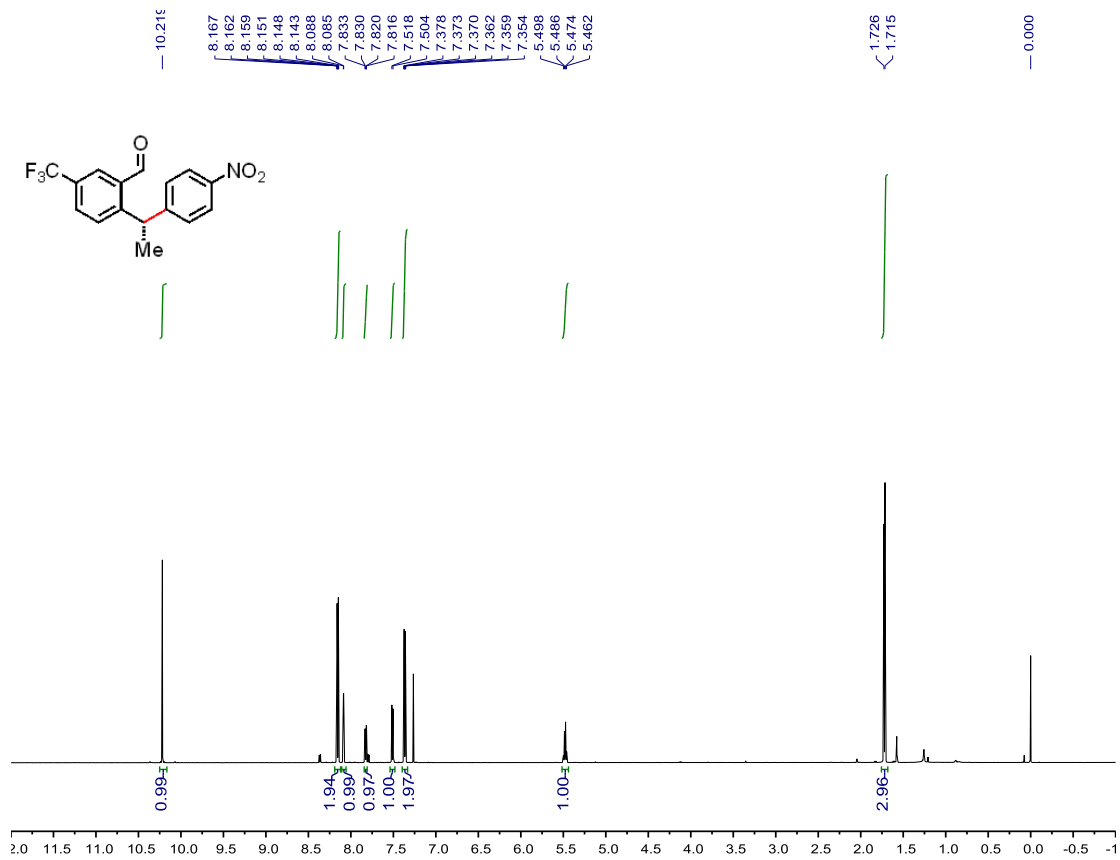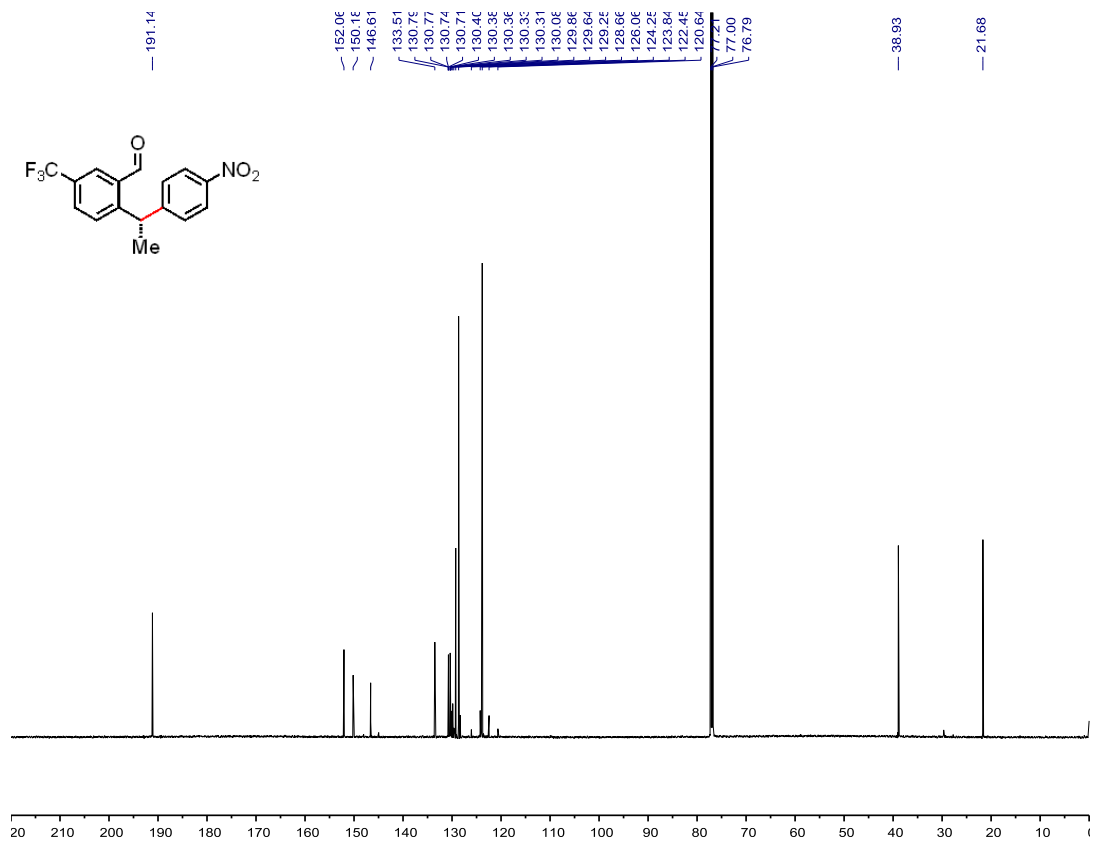

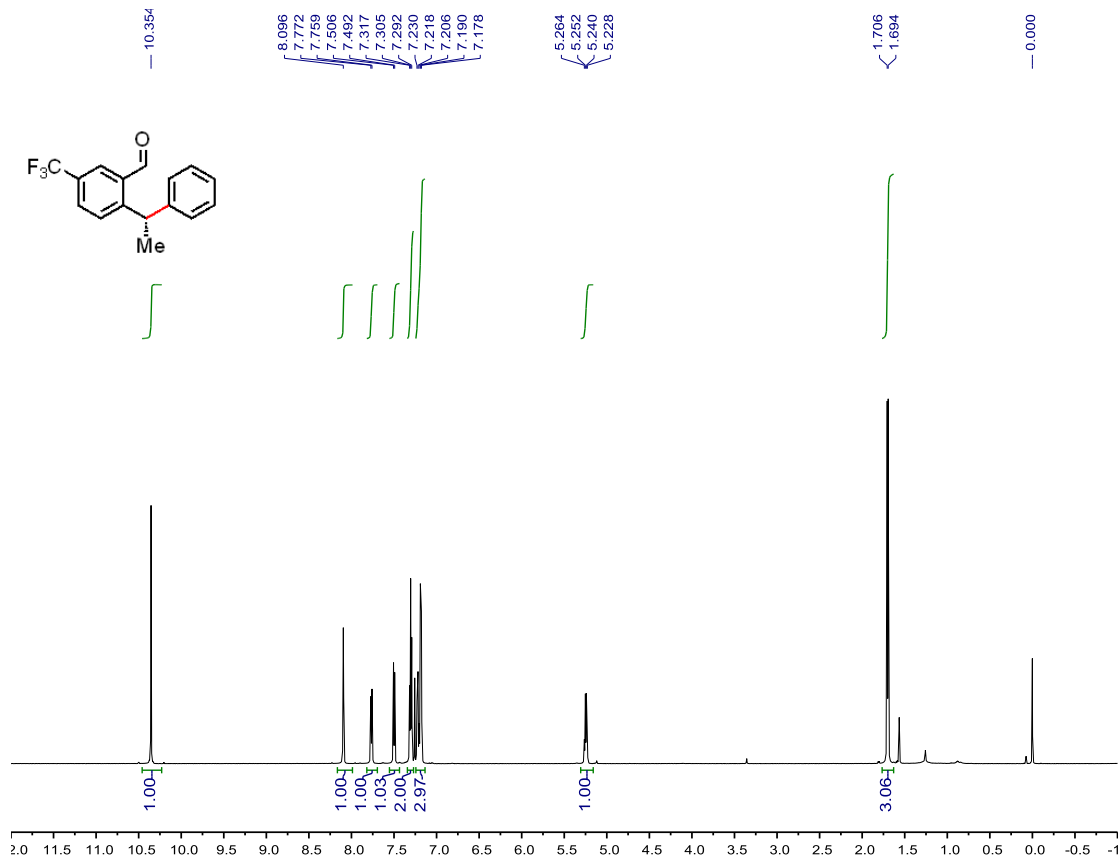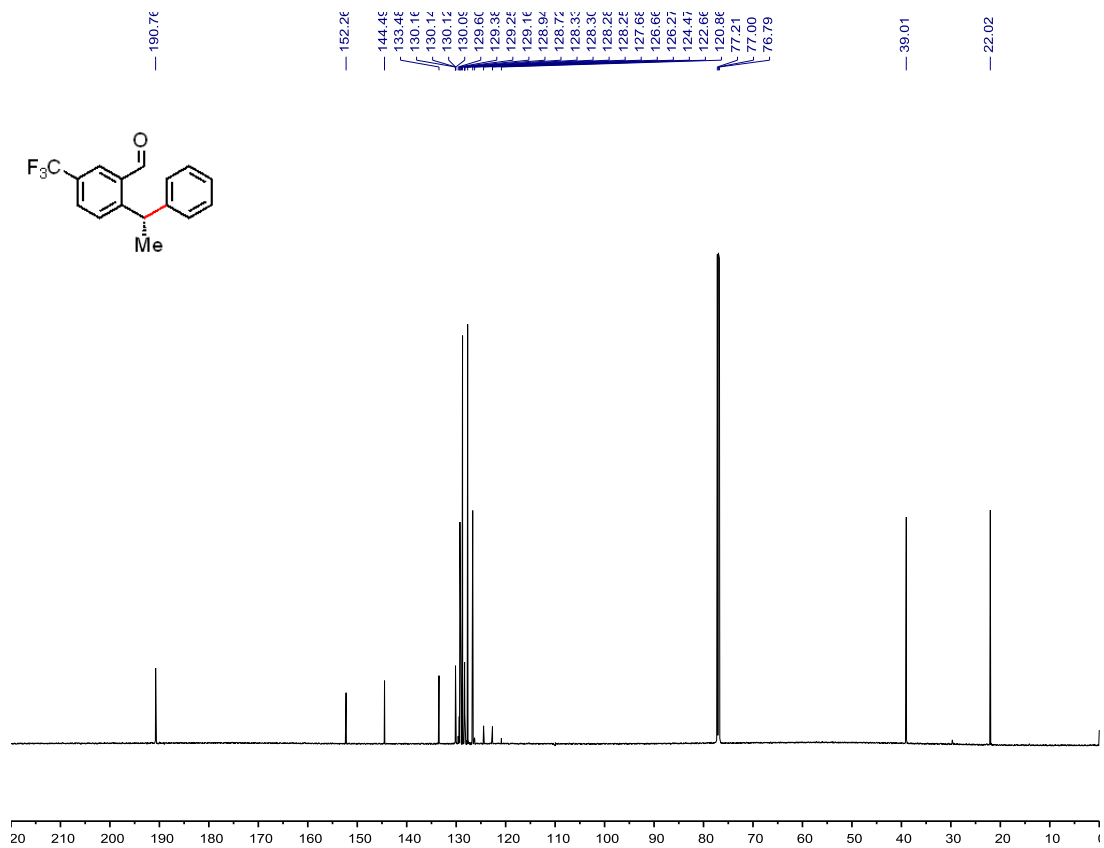

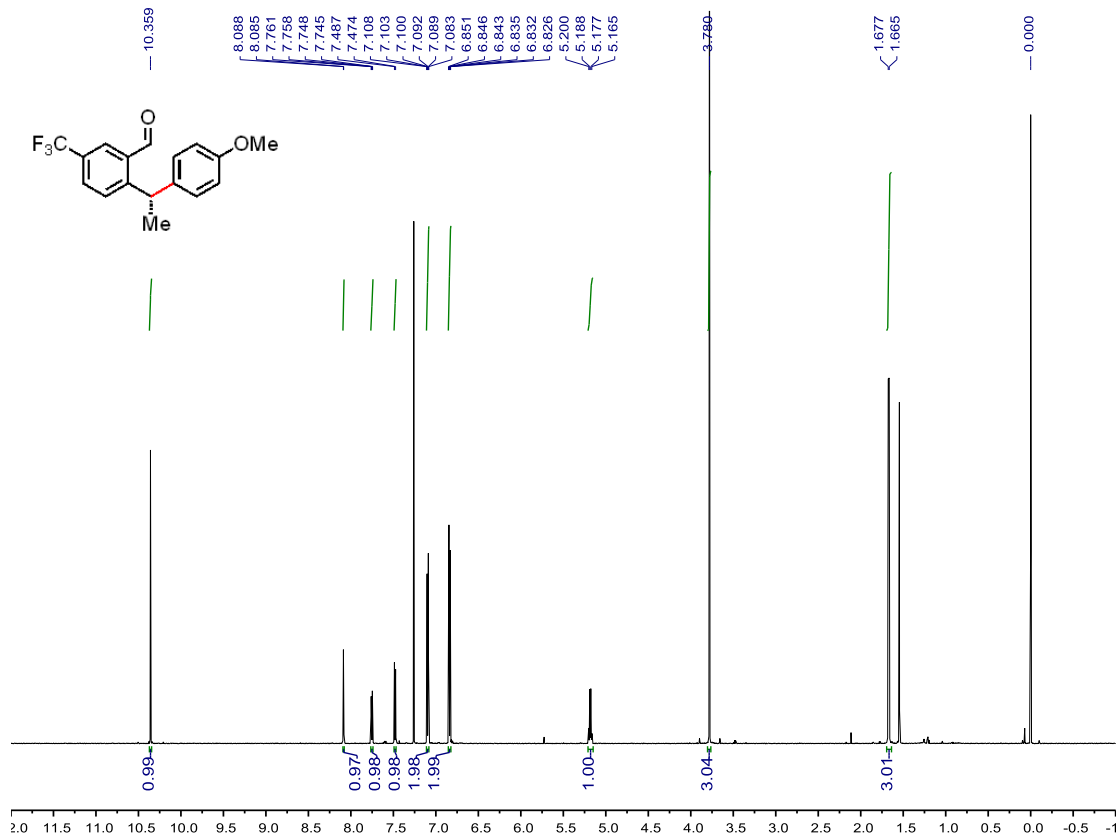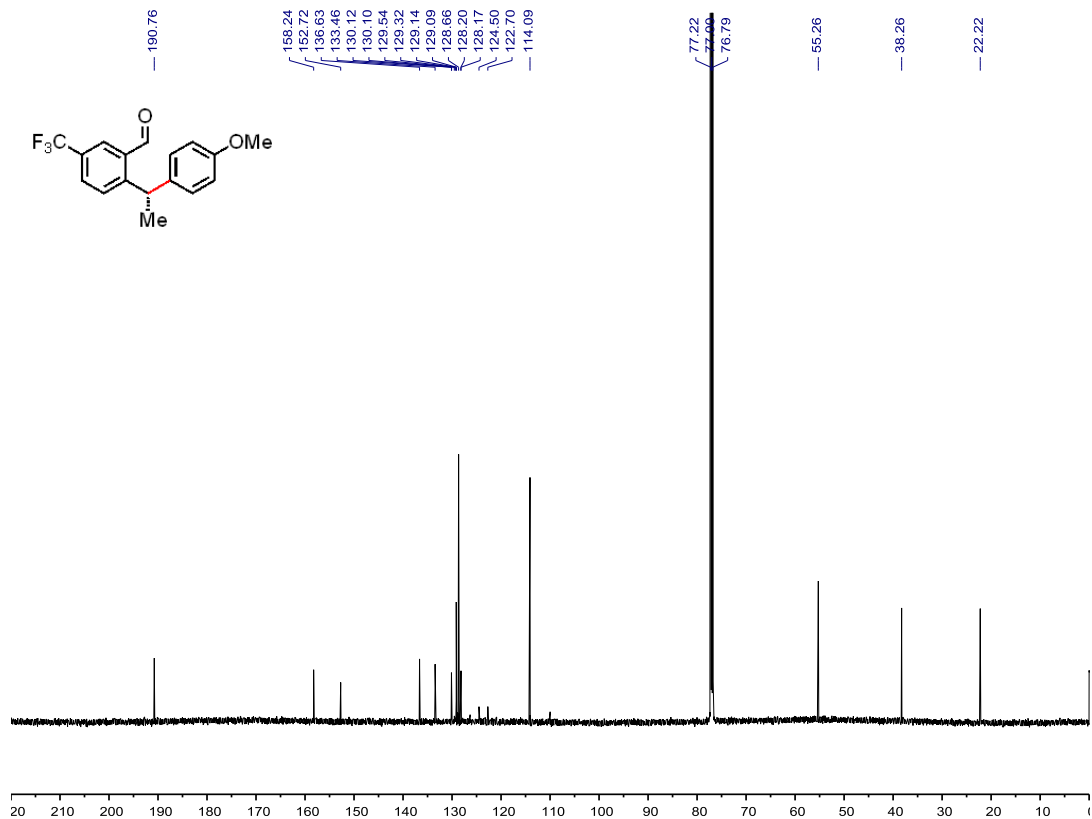

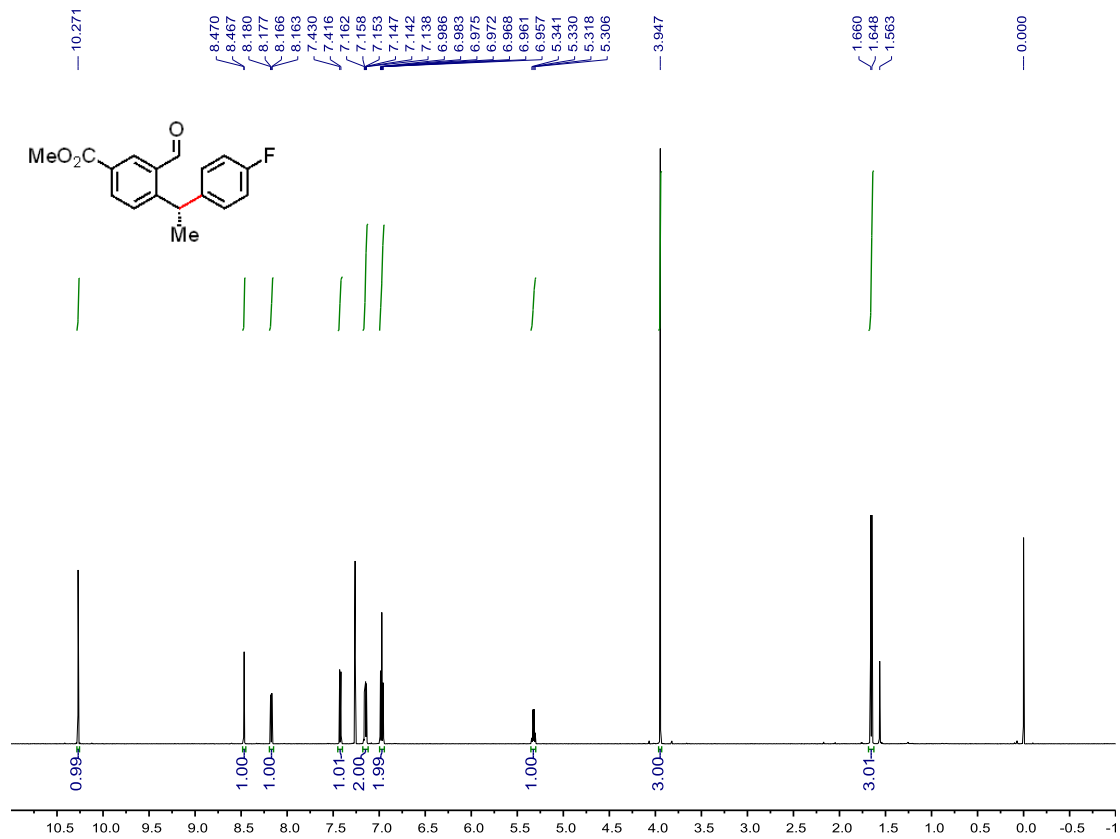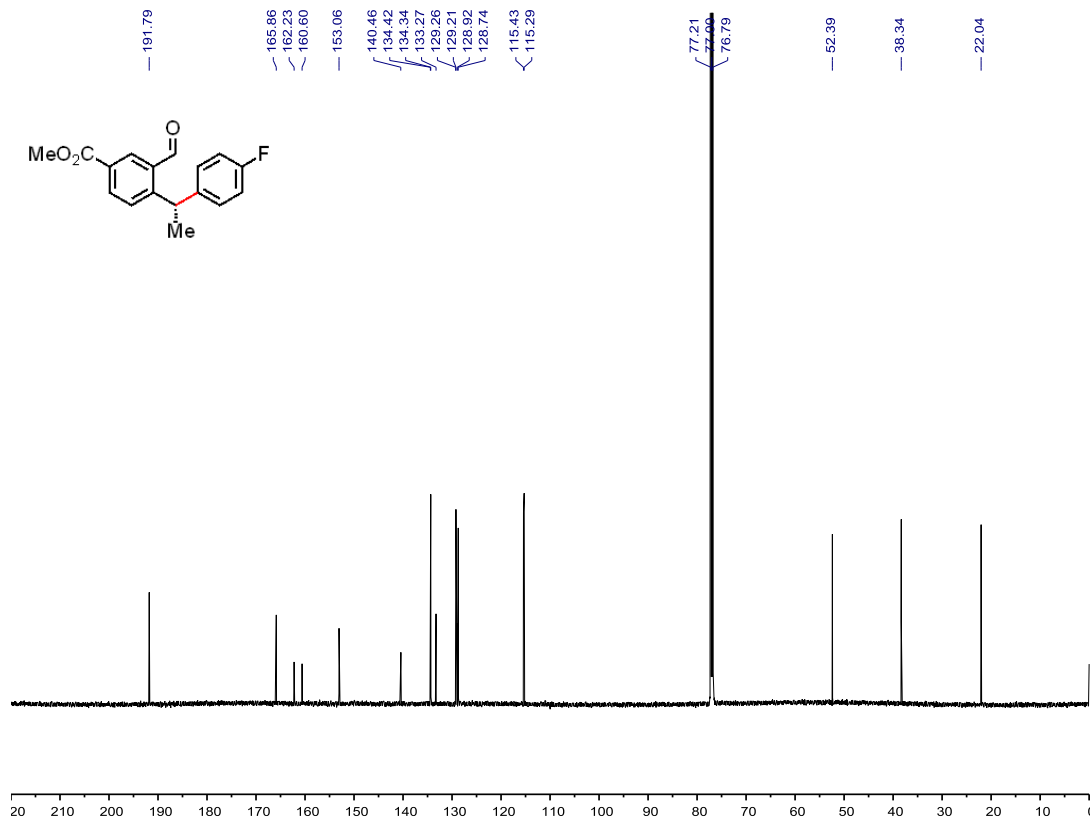

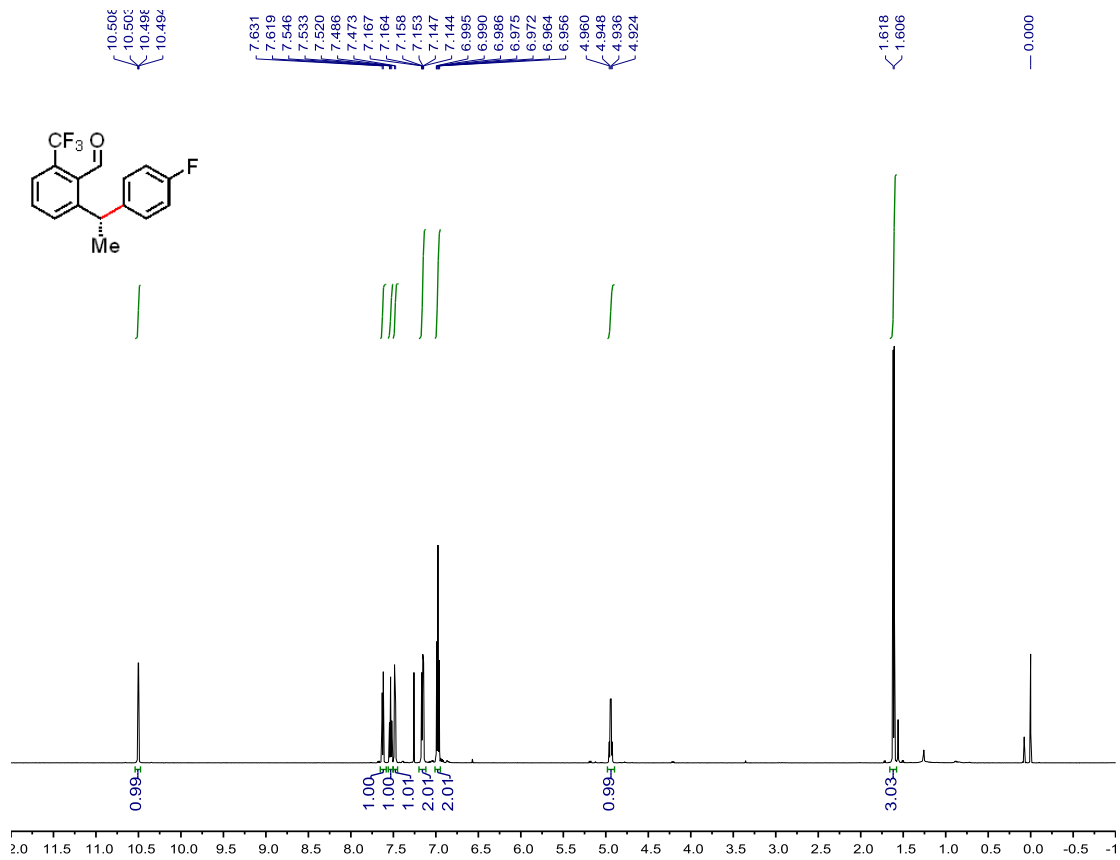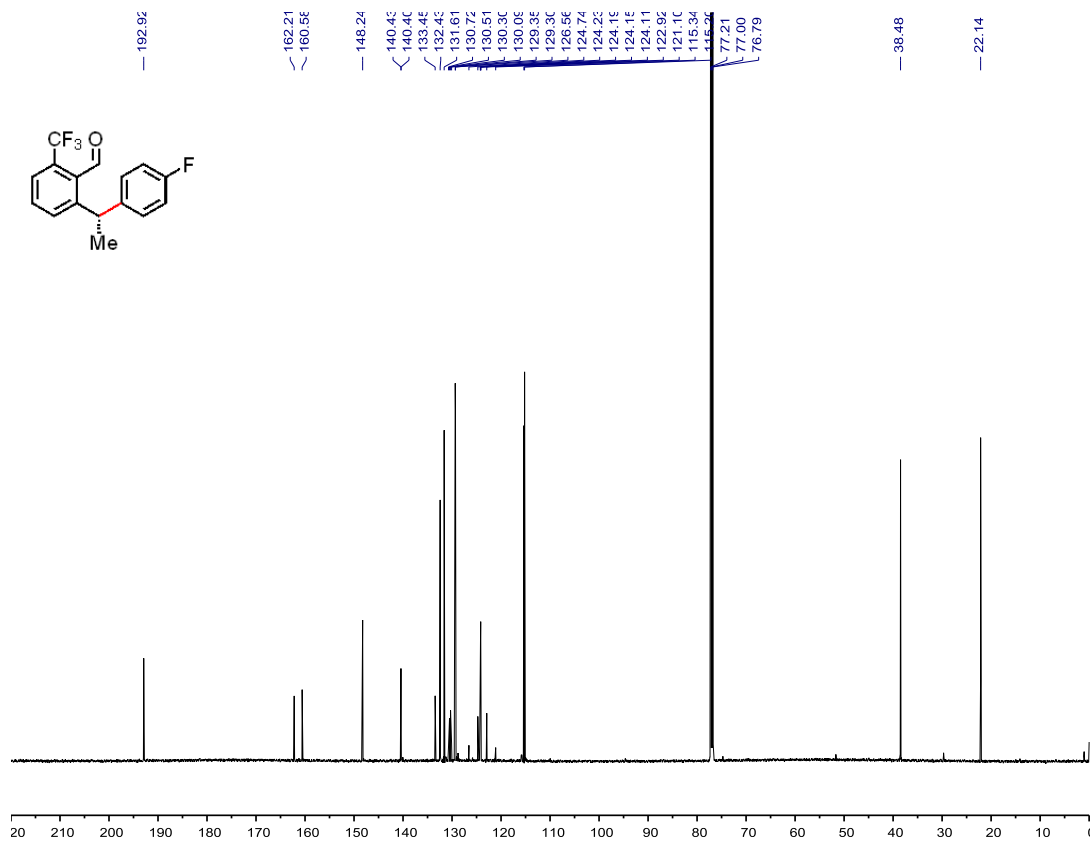

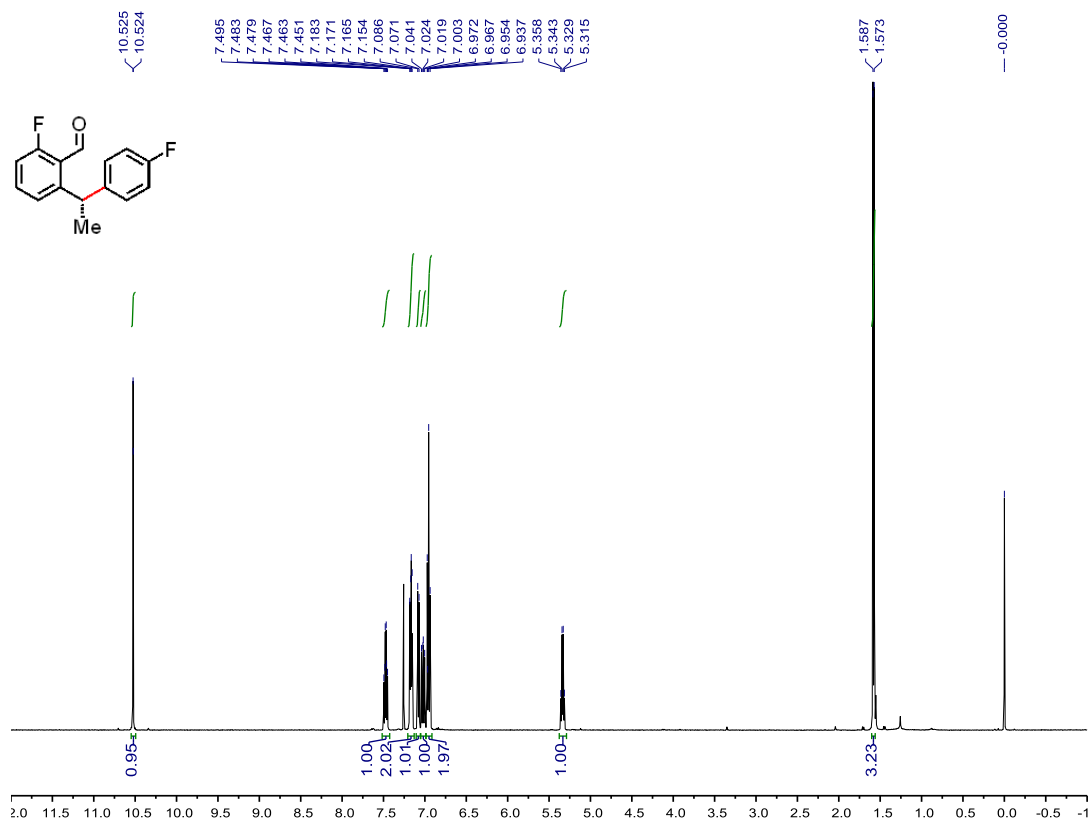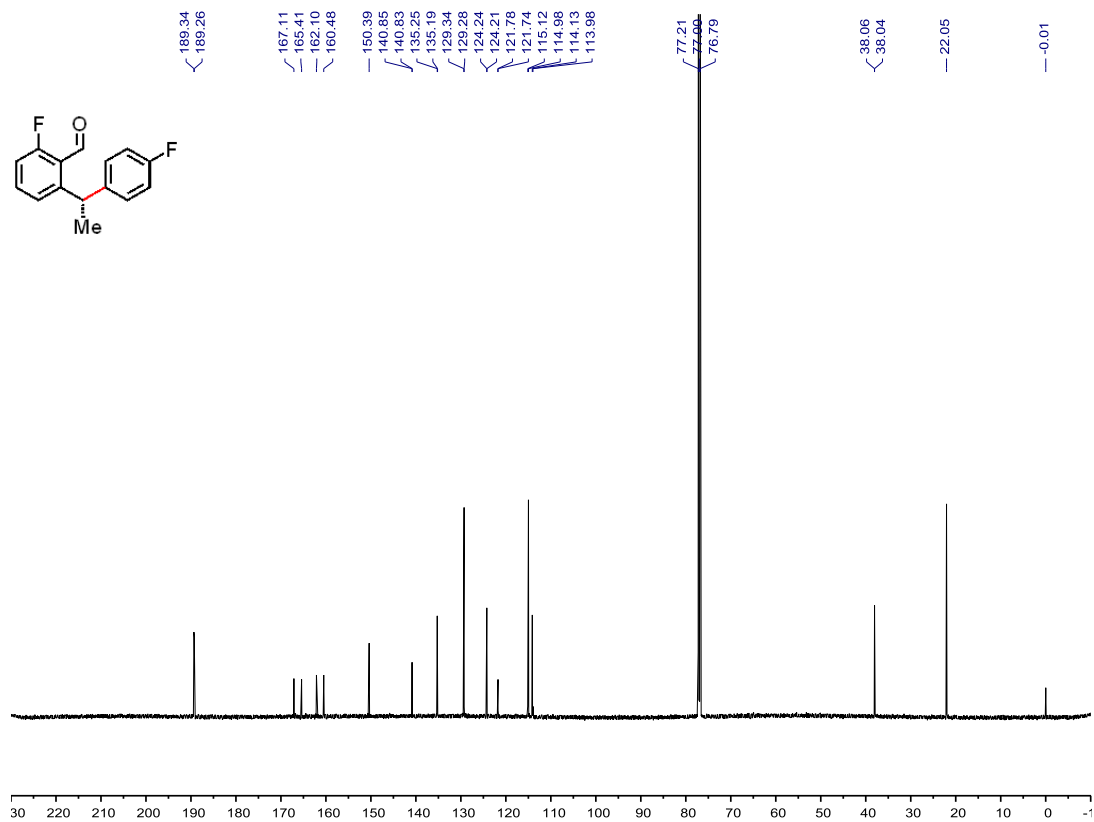



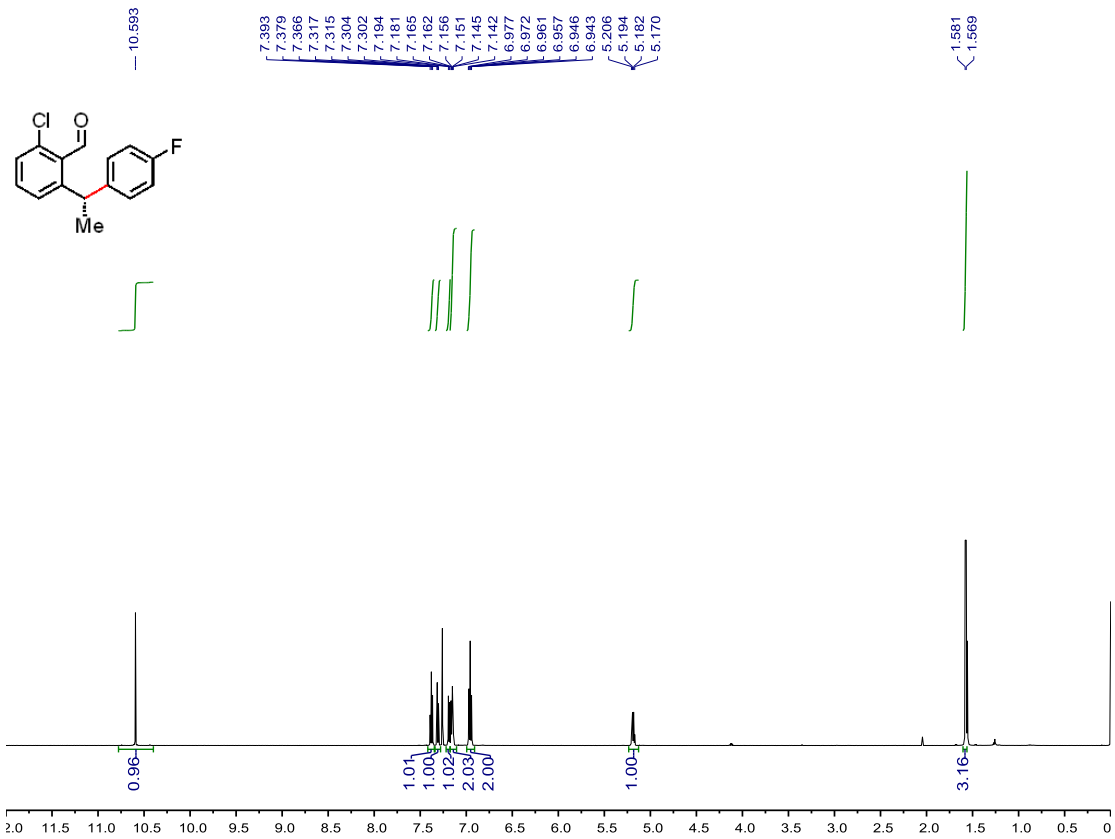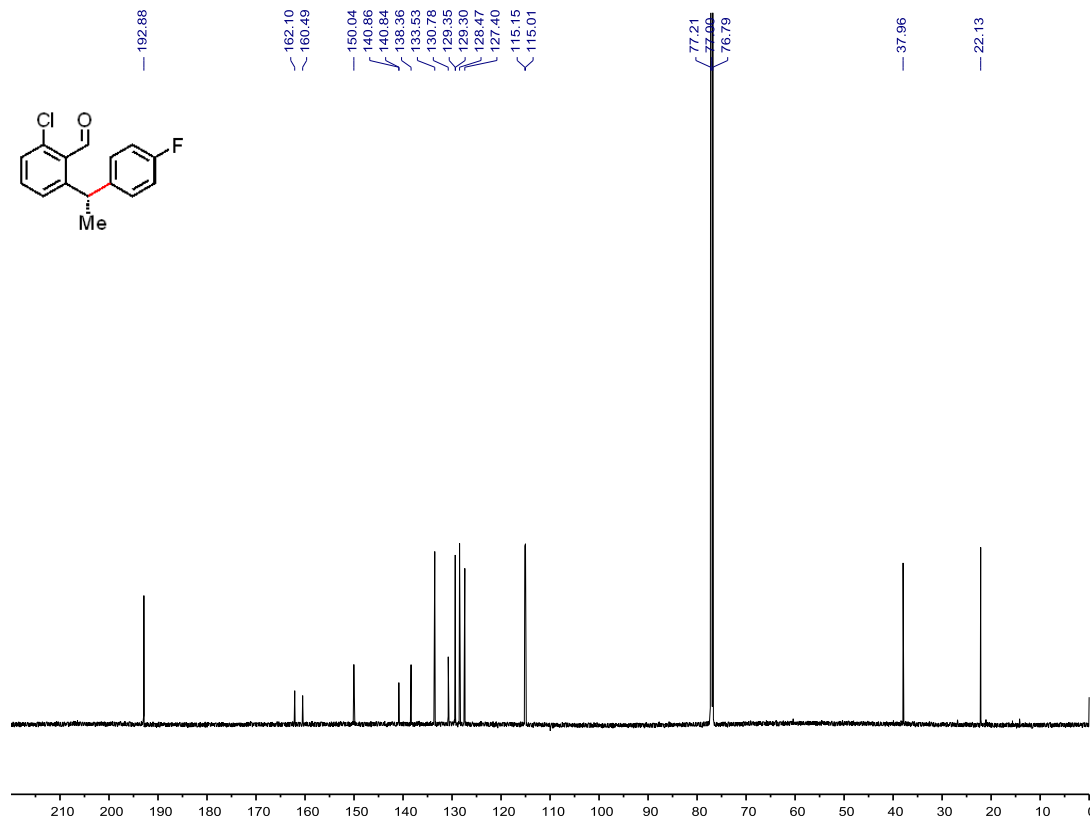

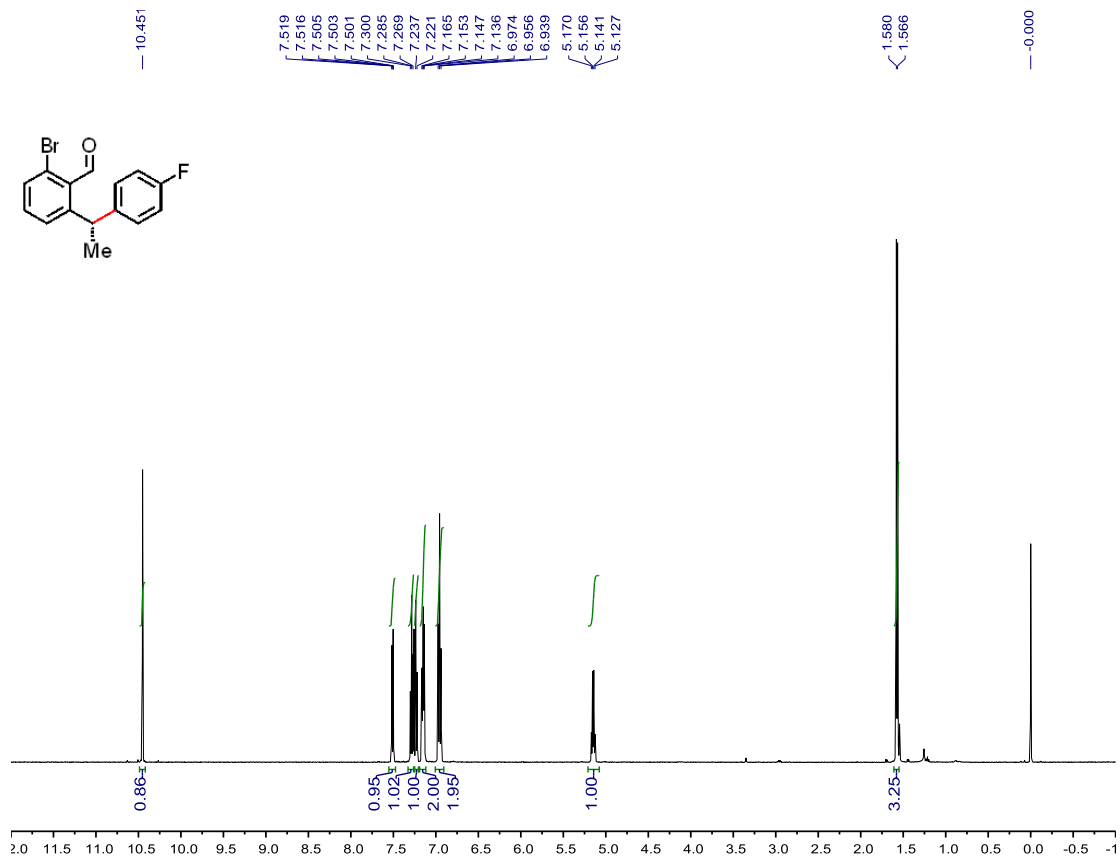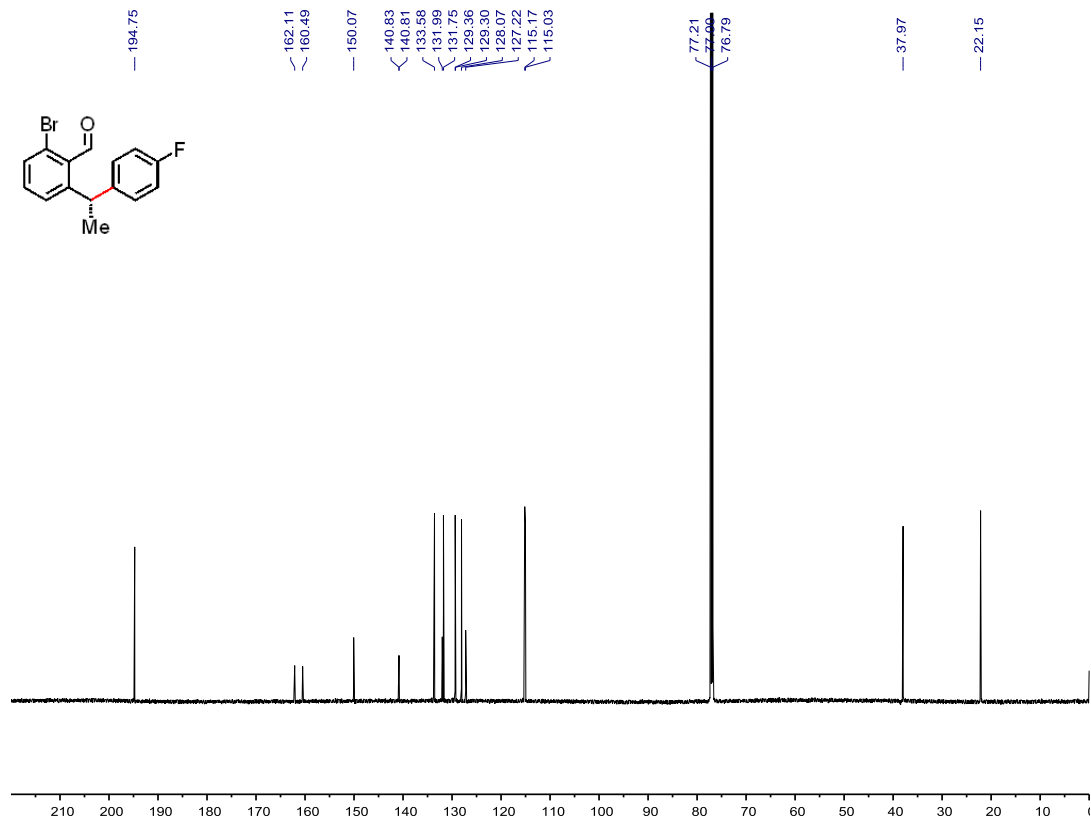

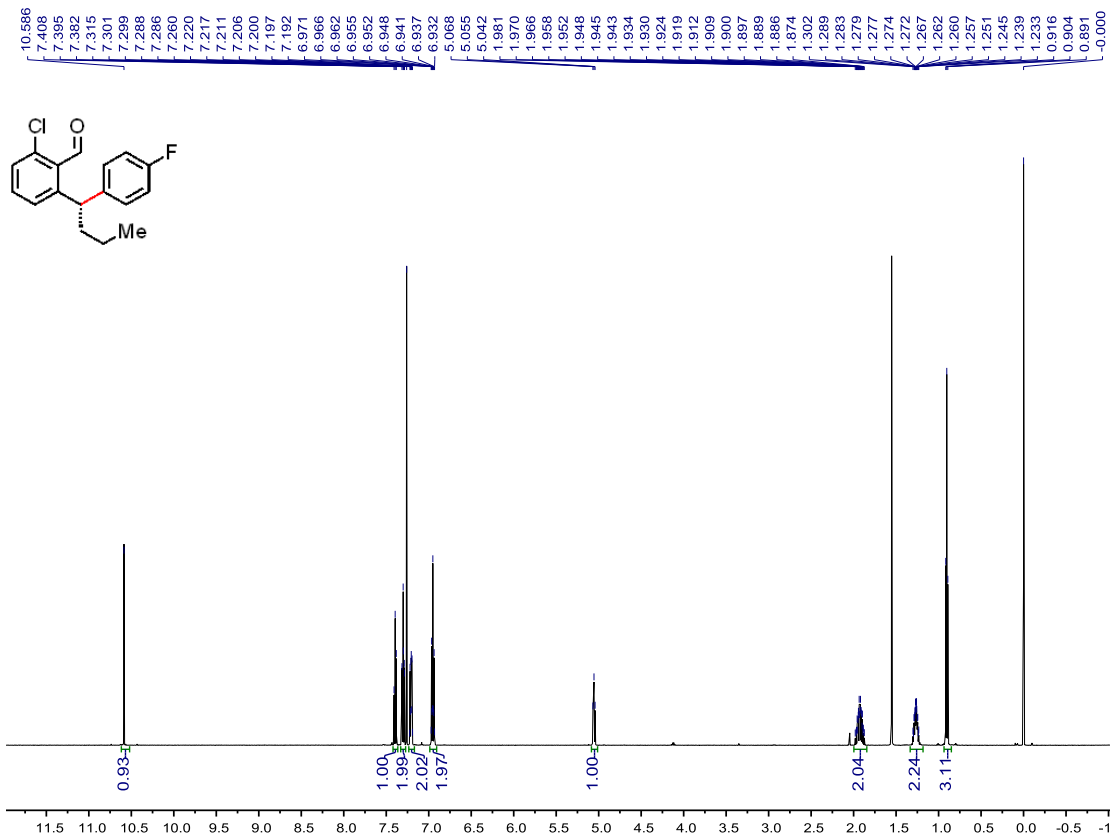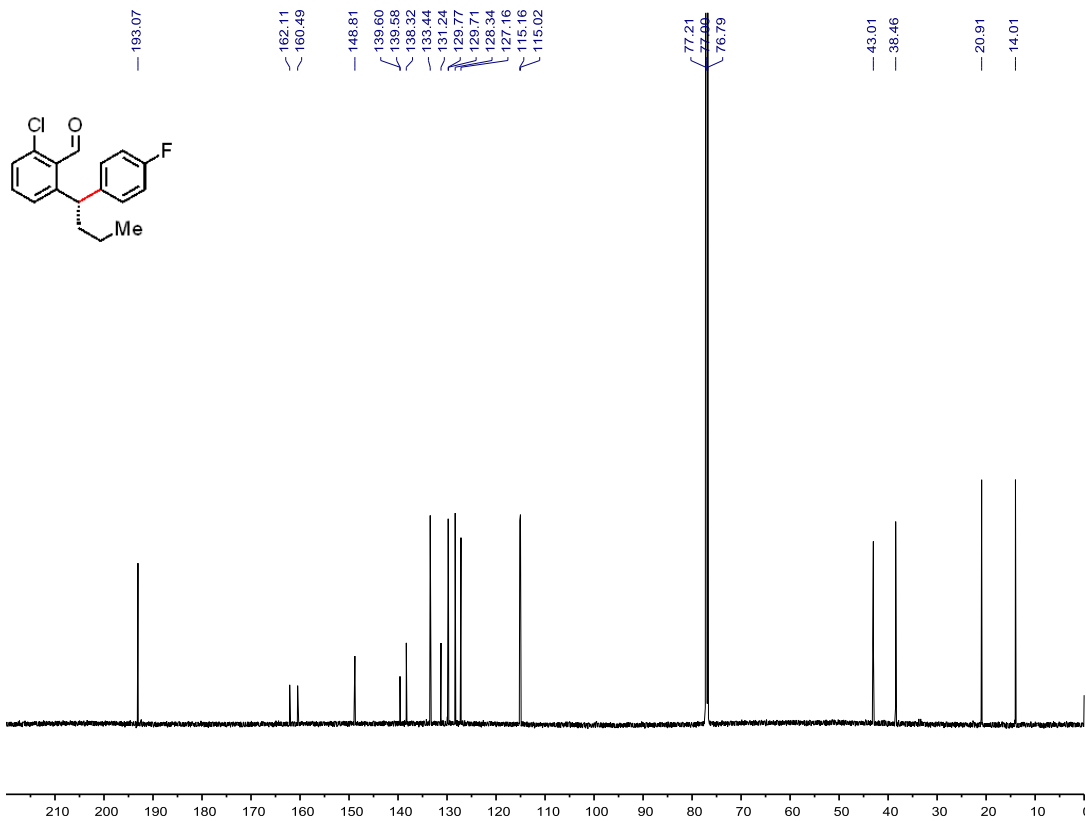

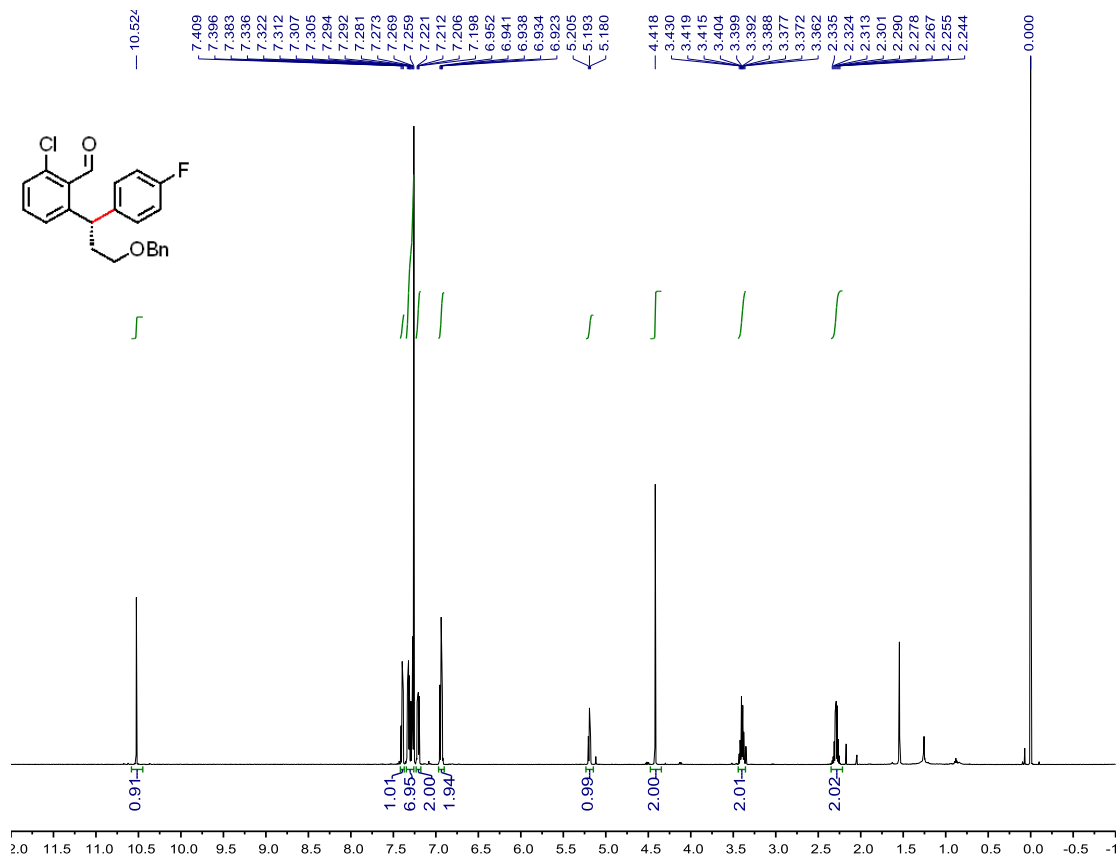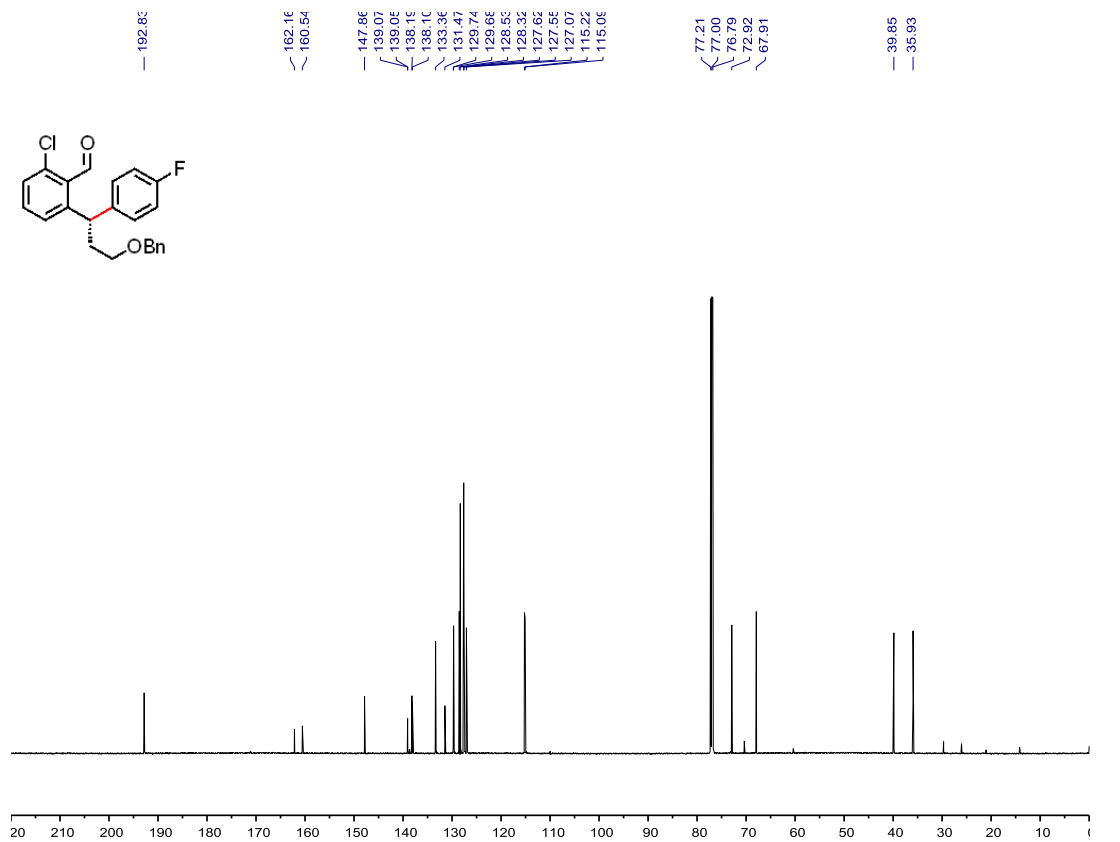

## HPLC Spectra

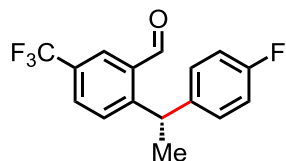

### Area % Report

Data File: C:\EZChrom Elite\Enterprise\Projects\Default\Data\KH\Transient Template\Supporting Information\KH-2-135-dilute-1%IPA-0.5ml-min-20min-AS-H

Method: C:\EZChrom Elite\Enterprise\Projects\Default\Method\A 20 min without fc 0.5 ml per min.met

Acquired: 9/12/2015 9:45:39 PM

Printed: 9/20/2015 4:09:30 PM

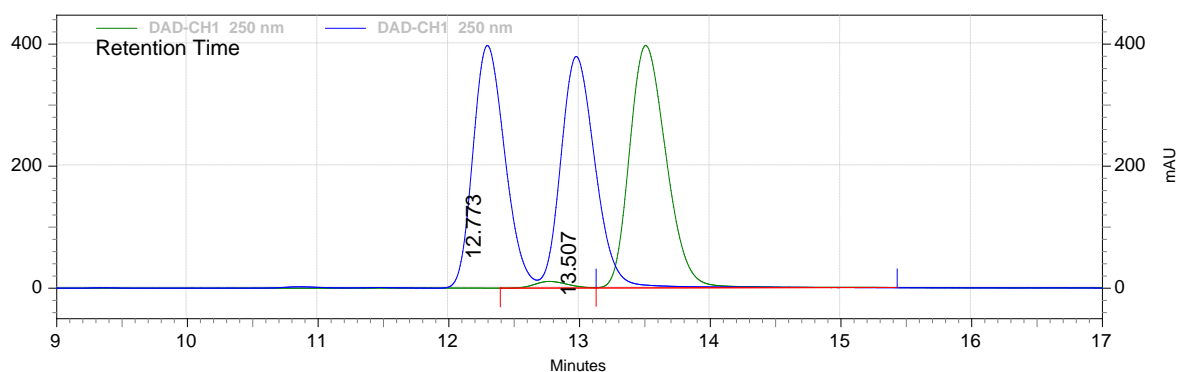

#### DAD-CH1 250 nm Results

| Retention Time | Area     | Area % | Height  | Height % |
|----------------|----------|--------|---------|----------|
| 12.773         | 753849   | 2.37   | 43391   | 2.66     |
| 13.507         | 31040381 | 97.63  | 1588913 | 97.34    |

|        |          |        |         |        |
|--------|----------|--------|---------|--------|
| Totals | 31794230 | 100.00 | 1632304 | 100.00 |
|--------|----------|--------|---------|--------|

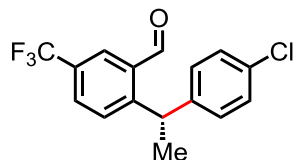

**Area % Report**

Data File: C:\EZChrom  
 Elite\Enterprise\Projects\Default\Data\HP\HP-1-043-5-report-1%IPA-0.5ml-30min-AS-H  
 Method: C:\EZChrom Elite\Enterprise\Projects\Default\Method\A 20 min without fc 0.5 ml per min.met  
 Acquired: 9/22/2015 2:21:20 PM  
 Printed: 9/22/2015 2:42:11 PM

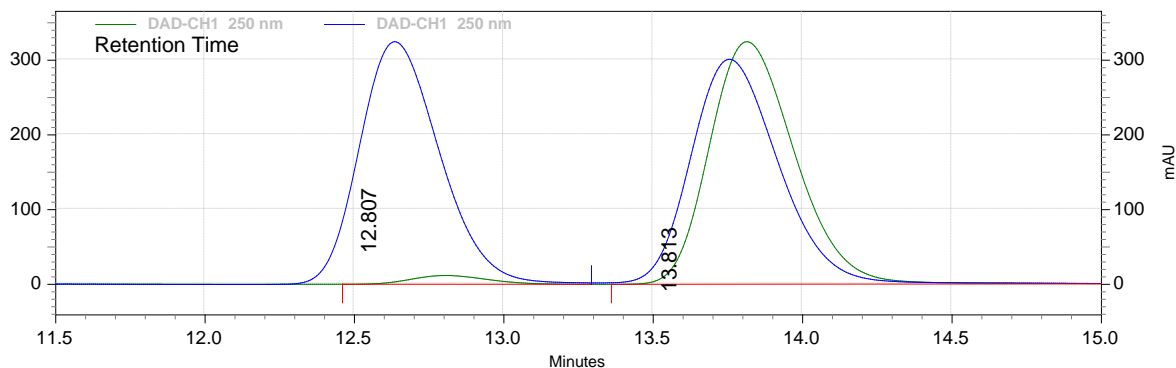

**DAD-CH1 250 nm Results**

| Retention Time | Area     | Area % | Height  | Height % |
|----------------|----------|--------|---------|----------|
| 12.807         | 833113   | 3.13   | 46902   | 3.49     |
| 13.813         | 25822746 | 96.87  | 1297870 | 96.51    |
| Totals         | 26655859 | 100.00 | 1344772 | 100.00   |

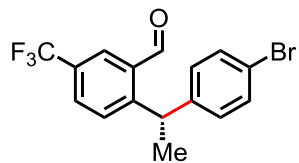

**Area % Report**

Data File: C:\EZChrom Elite\Enterprise\Projects\Default\Data\KH\Transient Template\Supporting Information\KH-2-134-1%IPA-0.5ml-20min-AS-H

Method: C:\EZChrom Elite\Enterprise\Projects\Default\Method\A 20 min without fc 0.5 ml per min.met

Acquired: 9/22/2015 12:14:02 AM

Printed: 9/22/2015 10:52:40 AM

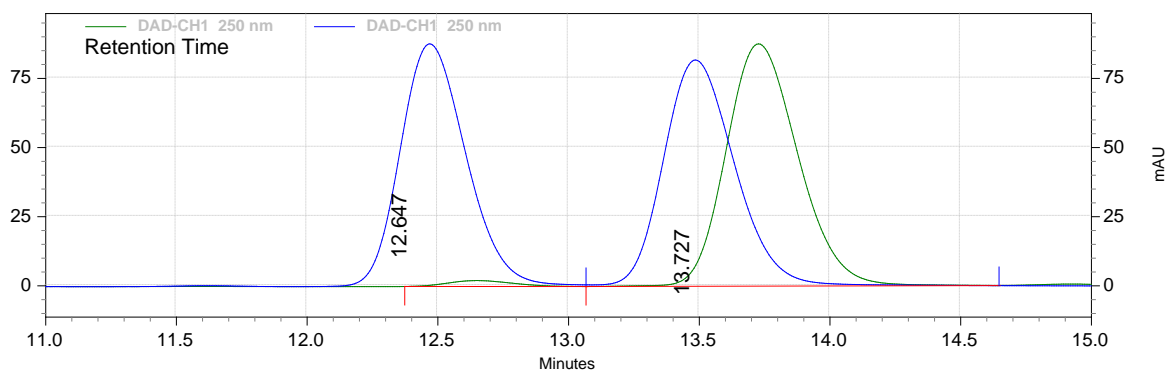

**DAD-CH1 250 nm Results**

| Retention Time | Area    | Area % | Height | Height % |
|----------------|---------|--------|--------|----------|
| 12.647         | 146092  | 2.14   | 8530   | 2.38     |
| 13.727         | 6692957 | 97.86  | 350195 | 97.62    |

|        |         |        |        |        |
|--------|---------|--------|--------|--------|
| Totals | 6839049 | 100.00 | 358725 | 100.00 |
|--------|---------|--------|--------|--------|

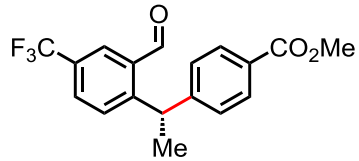

**Area % Report**

Data File: C:\EZChrom Elite\Enterprise\Projects\Default\Data\KH\Transient Template\Supporting Information\KH-2-132-A-10%IPA-0.5ml-min-30min-AS-H

Method: C:\EZChrom Elite\Enterprise\Projects\Default\Method\A 30 min without fc 0.5 ml per min.met

Acquired: 9/15/2015 3:20:38 PM

Printed: 9/15/2015 4:03:49 PM

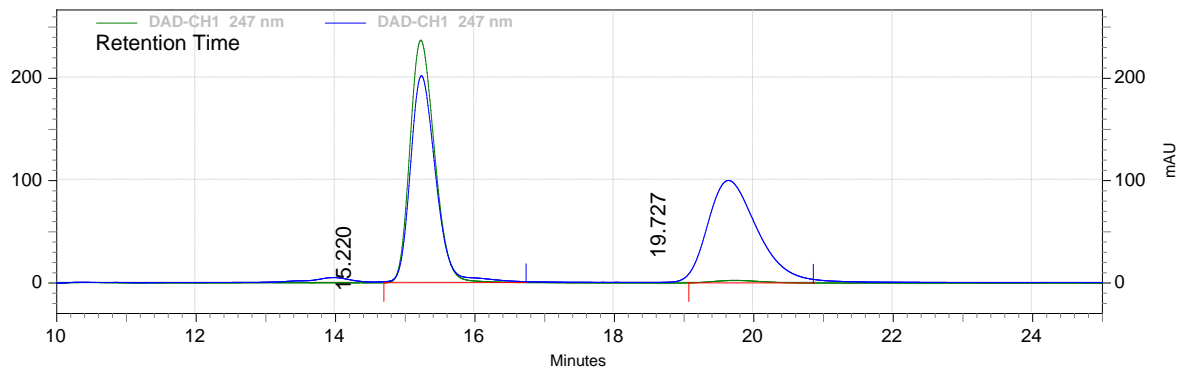

**DAD-CH1 247 nm Results**

| Retention Time | Area     | Area % | Height | Height % |
|----------------|----------|--------|--------|----------|
| 15.220         | 23241654 | 98.12  | 947263 | 98.98    |
| 19.727         | 445905   | 1.88   | 9791   | 1.02     |

|        |          |        |        |        |
|--------|----------|--------|--------|--------|
| Totals | 23687559 | 100.00 | 957054 | 100.00 |
|--------|----------|--------|--------|--------|



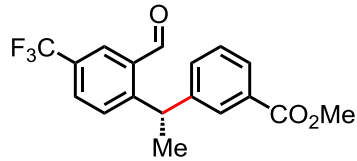

**Area % Report**

Data File: C:\EZChrom Elite\Enterprise\Projects\Default\Data\KH\Transient Template\Supporting Information\KH-2-132-B-5%IPA-0.5ml-min-30min-AS-H

Method: C:\EZChrom Elite\Enterprise\Projects\Default\Method\A 30 min without fc 0.5 ml per min.met

Acquired: 9/12/2015 11:59:54 PM

Printed: 9/20/2015 4:28:11 PM

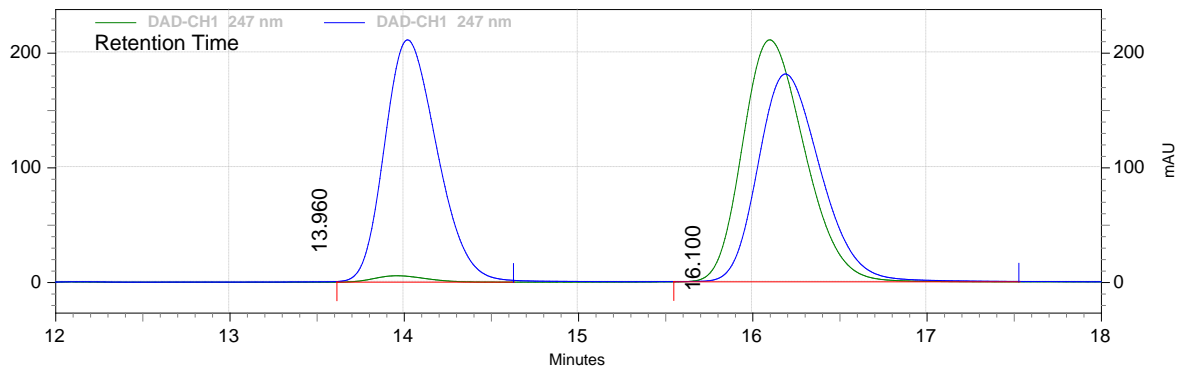

**DAD-CH1 247 nm Results**

| Retention Time | Area     | Area % | Height | Height % |
|----------------|----------|--------|--------|----------|
| 13.960         | 463549   | 2.17   | 22385  | 2.58     |
| 16.100         | 20944361 | 97.83  | 843898 | 97.42    |

|        |          |        |        |        |
|--------|----------|--------|--------|--------|
| Totals | 21407910 | 100.00 | 866283 | 100.00 |
|--------|----------|--------|--------|--------|

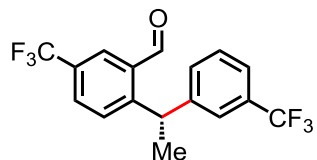

**Area % Report**

Data File: C:\EZChrom Elite\Enterprise\Projects\Default\Data\KH\Transient Template\Supporting Information\KH-2-149-B-1%IPA-0.5ml-min-20min-AS-H

Method: C:\EZChrom Elite\Enterprise\Projects\Default\Method\A 20 min without fc 0.5 ml per min.met

Acquired: 9/14/2015 9:02:34 PM

Printed: 9/20/2015 4:52:49 PM

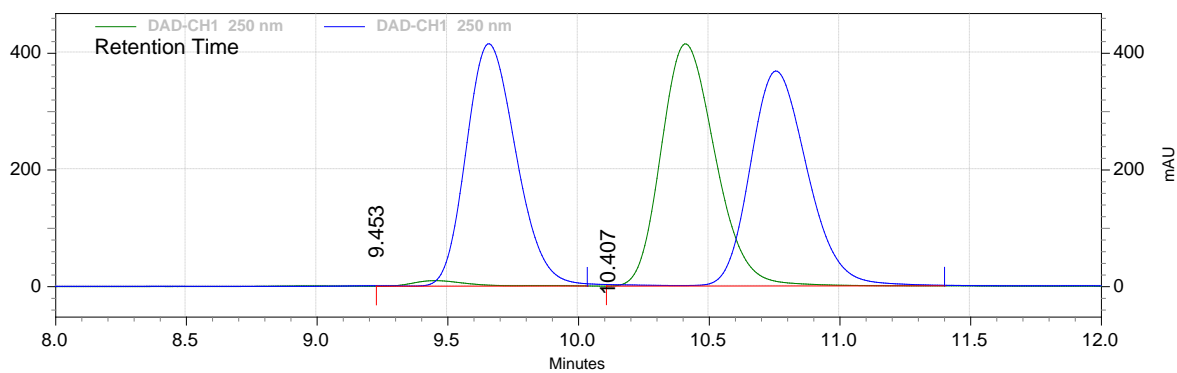

**DAD-CH1 250 nm Results**

| Retention Time | Area     | Area % | Height  | Height % |
|----------------|----------|--------|---------|----------|
| 9.453          | 561320   | 2.29   | 38231   | 2.25     |
| 10.407         | 23949861 | 97.71  | 1660094 | 97.75    |

|        |          |        |         |        |
|--------|----------|--------|---------|--------|
| Totals | 24511181 | 100.00 | 1698325 | 100.00 |
|--------|----------|--------|---------|--------|

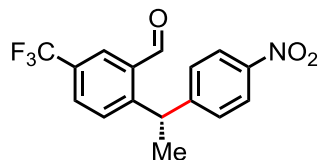

**Area % Report**

Data File: C:\EZChrom Elite\Enterprise\Projects\Default\Data\KH\Transient Template\Supporting Information\KH-2-154-C-20%IPA-0.5ml-min-30min-AS-H

Method: C:\EZChrom Elite\Enterprise\Projects\Default\Method\A 30 min without fc 0.5 ml per min.met

Acquired: 9/18/2015 8:36:05 PM

Printed: 9/18/2015 10:53:35 PM

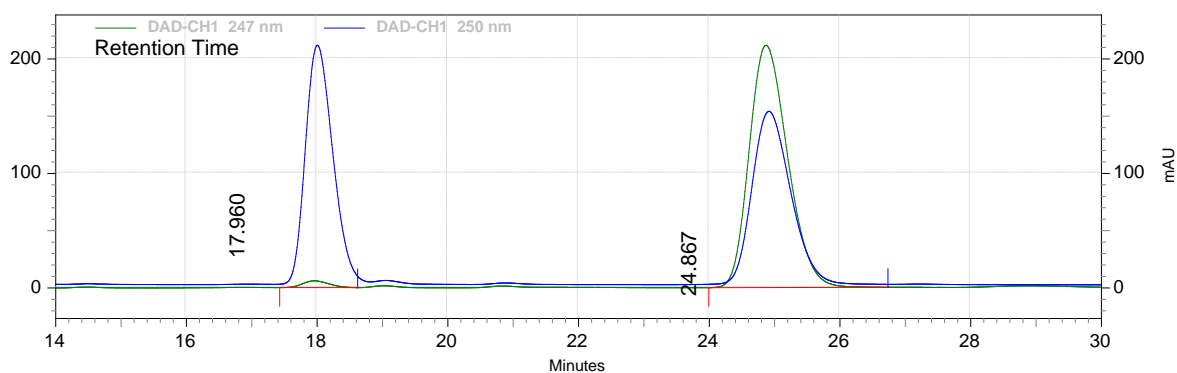

**DAD-CH1 247 nm Results**

| Retention Time | Area     | Area % | Height | Height % |
|----------------|----------|--------|--------|----------|
| 17.960         | 657590   | 1.86   | 23477  | 2.70     |
| 24.867         | 34618590 | 98.14  | 846528 | 97.30    |

|        |          |        |        |        |
|--------|----------|--------|--------|--------|
| Totals | 35276180 | 100.00 | 870005 | 100.00 |
|--------|----------|--------|--------|--------|

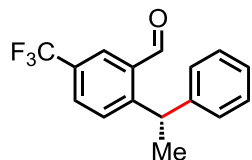

**Area % Report**

Data File: C:\EZChrom Elite\Enterprise\Projects\Default\Data\KH\Transient Template\Supporting Information\KH-3-075-A-1%IPA-0.5ml-min-30min-AS-H

Method: C:\EZChrom Elite\Enterprise\Projects\Default\Method\A 30 min without fc 0.5 ml per min.met

Acquired: 11/27/2015 6:25:56 PM

Printed: 11/29/2015 10:42:09 PM

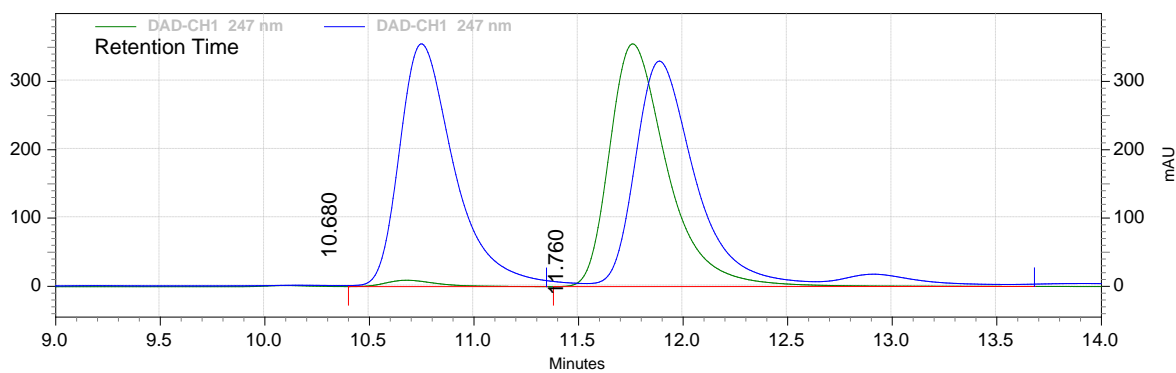

**DAD-CH1 247 nm Results**

| Retention Time | Area     | Area % | Height  | Height % |
|----------------|----------|--------|---------|----------|
| 10.680         | 632406   | 2.26   | 37047   | 2.54     |
| 11.760         | 27319853 | 97.74  | 1420980 | 97.46    |

|        |          |        |         |        |
|--------|----------|--------|---------|--------|
| Totals | 27952259 | 100.00 | 1458027 | 100.00 |
|--------|----------|--------|---------|--------|

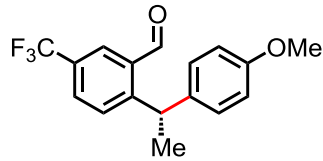

**Area % Report**

Data File: C:\EZChrom  
 Elite\Enterprise\Projects\Default\Data\HP\HP-1-052-report-3%IPA-0.5ml-30min-OD-H  
 Method: C:\EZChrom Elite\Enterprise\Projects\Default\Method\A 40 min without fc 0.5 ml per min.met  
 Acquired: 9/22/2015 4:09:22 PM  
 Printed: 9/22/2015 5:08:15 PM

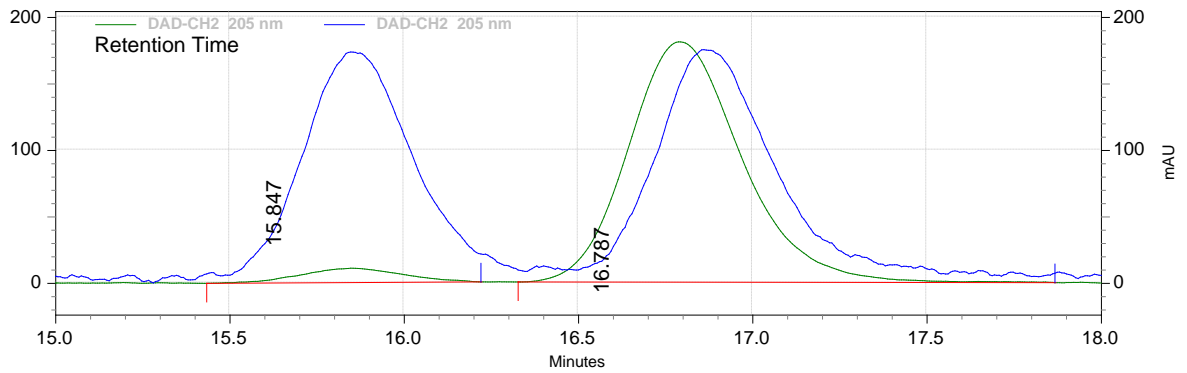

**DAD-CH1 250 nm Results**

| Retention Time | Area    | Area % | Height | Height % |
|----------------|---------|--------|--------|----------|
| 15.847         | 253676  | 5.00   | 12143  | 5.34     |
| 16.793         | 4821634 | 95.00  | 215333 | 94.66    |

|        |         |        |        |        |
|--------|---------|--------|--------|--------|
| Totals | 5075310 | 100.00 | 227476 | 100.00 |
|--------|---------|--------|--------|--------|

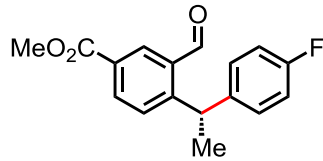

**Area % Report**

Data File: C:\EZChrom Elite\Enterprise\Projects\Default\Data\HP\HP-1-041-2-5%IPA-0.5ml-30min-AS-H  
 Method: C:\EZChrom Elite\Enterprise\Projects\Default\Method\A 30 min without fc 0.5 ml per min.met  
 Acquired: 9/14/2015 11:15:32 AM  
 Printed: 9/20/2015 6:16:51 PM

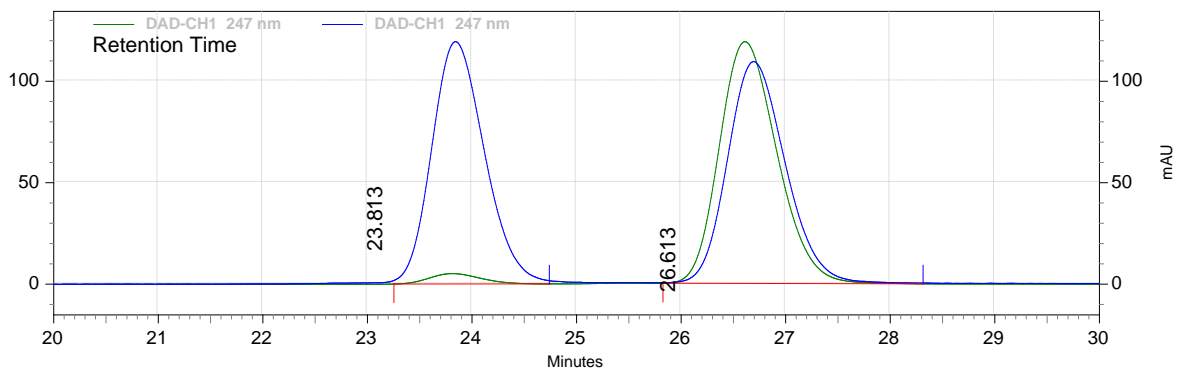

**DAD-CH1 247 nm Results**

| Retention Time | Area     | Area % | Height | Height % |
|----------------|----------|--------|--------|----------|
| 23.813         | 697192   | 3.67   | 20523  | 4.13     |
| 26.613         | 18298532 | 96.33  | 476628 | 95.87    |

|        |          |        |        |        |
|--------|----------|--------|--------|--------|
| Totals | 18995724 | 100.00 | 497151 | 100.00 |
|--------|----------|--------|--------|--------|

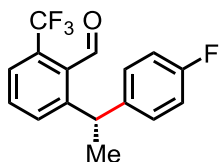

**Area % Report**

Data File: C:\EZChrom Elite\Enterprise\Projects\Default\Data\KH\Transient Template\Supporting Information\KH-2-150-A-1%IPA-0.5ml-min-20min-AS-H

Method: C:\EZChrom Elite\Enterprise\Projects\Default\Method\A 20 min without fc 0.5 ml per min.met

Acquired: 9/14/2015 7:15:56 PM

Printed: 9/20/2015 4:39:57 PM

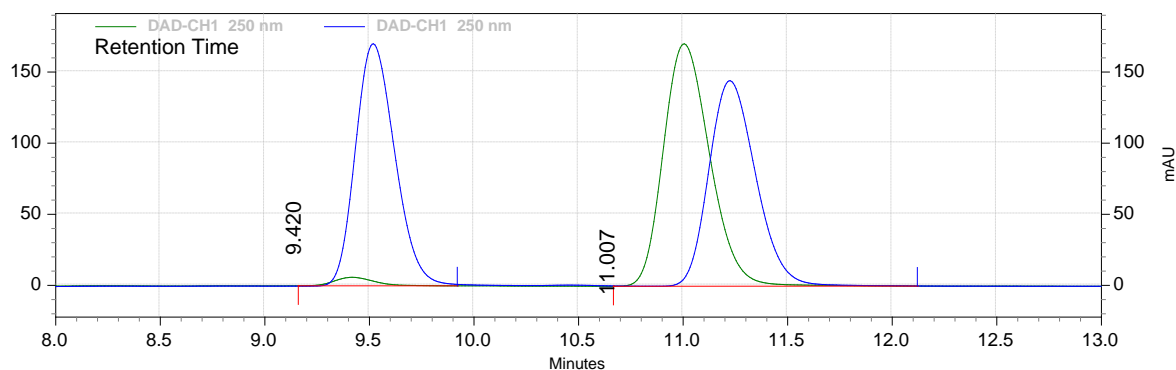

**DAD-CH1 250 nm Results**

| Retention Time | Area     | Area % | Height | Height % |
|----------------|----------|--------|--------|----------|
| 9.420          | 317834   | 2.93   | 23919  | 3.39     |
| 11.007         | 10535448 | 97.07  | 681885 | 96.61    |

|        |          |        |        |        |
|--------|----------|--------|--------|--------|
| Totals | 10853282 | 100.00 | 705804 | 100.00 |
|--------|----------|--------|--------|--------|

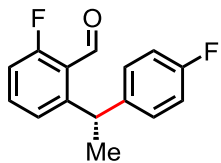

**Area % Report**

Data File: C:\EZChrom Elite\Enterprise\Projects\Default\Data\KH\Transient Template\Supporting Information\KH-2-091-B-3%IPA-0.5ml-min-40min-AS-H

Method: C:\EZChrom Elite\Enterprise\Projects\Default\Method\A 40 min without fc 0.5 ml per min.met

Acquired: 8/23/2015 2:39:20 PM

Printed: 8/23/2015 3:02:11 PM

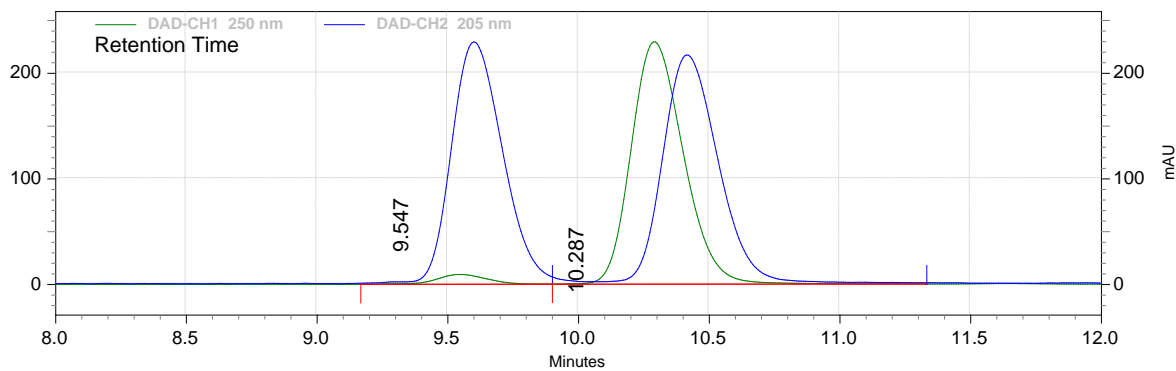

**DAD-CH1 250 nm Results**

| Retention Time | Area     | Area % | Height | Height % |
|----------------|----------|--------|--------|----------|
| 9.547          | 502990   | 3.79   | 37240  | 3.90     |
| 10.287         | 12759456 | 96.21  | 917668 | 96.10    |

|        |          |        |        |        |
|--------|----------|--------|--------|--------|
| Totals | 13262446 | 100.00 | 954908 | 100.00 |
|--------|----------|--------|--------|--------|



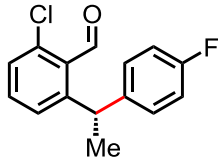

**Area % Report**

Data File: C:\EZChrom Elite\Enterprise\Projects\Default\Data\KH\Transient Template\Supporting Information\KH-2-088-B -3%IPA-0.5ml-min-20min-AS-H

Method: C:\EZChrom Elite\Enterprise\Projects\Default\Method\A 20 min without fc 0.5 ml per min.met

Acquired: 8/18/2015 5:46:32 PM

Printed: 9/19/2015 11:08:05 PM

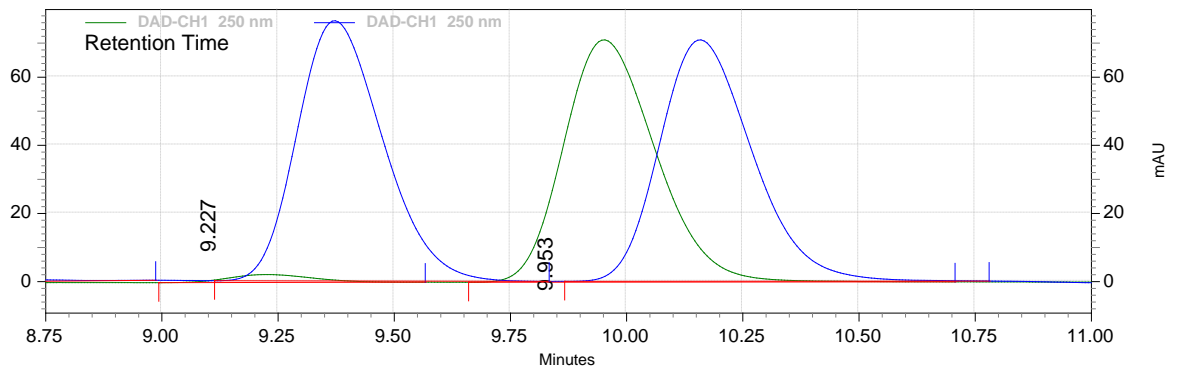

**DAD-CH1 250 nm Results**

| Retention Time | Area    | Area % | Height | Height % |
|----------------|---------|--------|--------|----------|
| 9.227          | 115704  | 2.88   | 9269   | 3.16     |
| 9.953          | 3904117 | 97.12  | 284443 | 96.84    |

|        |         |        |        |        |
|--------|---------|--------|--------|--------|
| Totals | 4019821 | 100.00 | 293712 | 100.00 |
|--------|---------|--------|--------|--------|

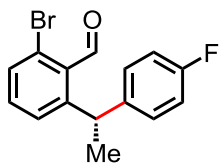

**Area % Report**

Data File: C:\EZChrom Elite\Enterprise\Projects\Default\Data\KH\Transient Template\Supporting Information\KH-2-104-3%IPA-0.5ml-min-20min-AS-H

Method: C:\EZChrom Elite\Enterprise\Projects\Default\Method\A 20 min without fc 0.5 ml per min.met

Acquired: 8/27/2015 3:59:18 PM

Printed: 8/27/2015 4:23:11 PM

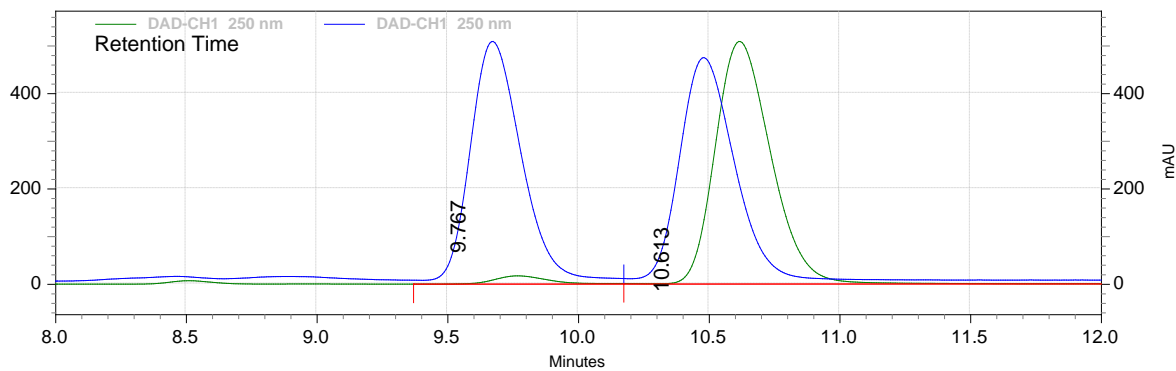

**DAD-CH1 250 nm Results**

| Retention Time | Area     | Area % | Height  | Height % |
|----------------|----------|--------|---------|----------|
| 9.767          | 978432   | 3.14   | 68694   | 3.26     |
| 10.613         | 30229310 | 96.86  | 2035371 | 96.74    |
| Totals         | 31207742 | 100.00 | 2104065 | 100.00   |

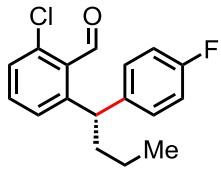

**Area % Report**

Data File: C:\EZChrom Elite\Enterprise\Projects\Default\Data\KH\Transient Template\Supporting Information\KH-2-093-B-1%IPA-0.5ml-min-90min-OD-H

Method: C:\EZChrom Elite\Enterprise\Projects\Default\Method\A 90 min without fc 0.5 ml per min.met

Acquired: 8/20/2015 3:12:37 PM

Printed: 9/19/2015 11:33:10 PM

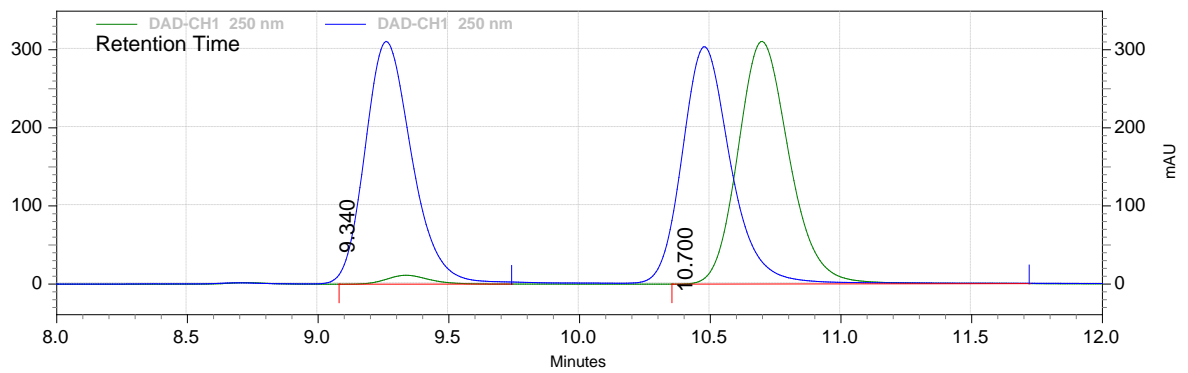

**DAD-CH1 250 nm Results**

| Retention Time | Area     | Area % | Height  | Height % |
|----------------|----------|--------|---------|----------|
| 9.340          | 517110   | 2.95   | 45223   | 3.51     |
| 10.700         | 16982876 | 97.05  | 1241936 | 96.49    |
| Totals         | 17499986 | 100.00 | 1287159 | 100.00   |

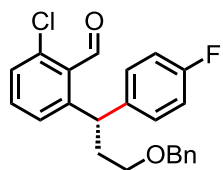

**Area % Report**

Data File: C:\EZChrom Elite\Enterprise\Projects\Default\Data\KH\Transient Template\Supporting Information\KH-2-101-C-1%IPA-0.5ml-min-45min-OD-H

Method: C:\EZChrom Elite\Enterprise\Projects\Default\Method\A 45 min without fc 0.5 ml per min.met

Acquired: 8/24/2015 9:53:48 PM

Printed: 9/20/2015 8:46:18 PM

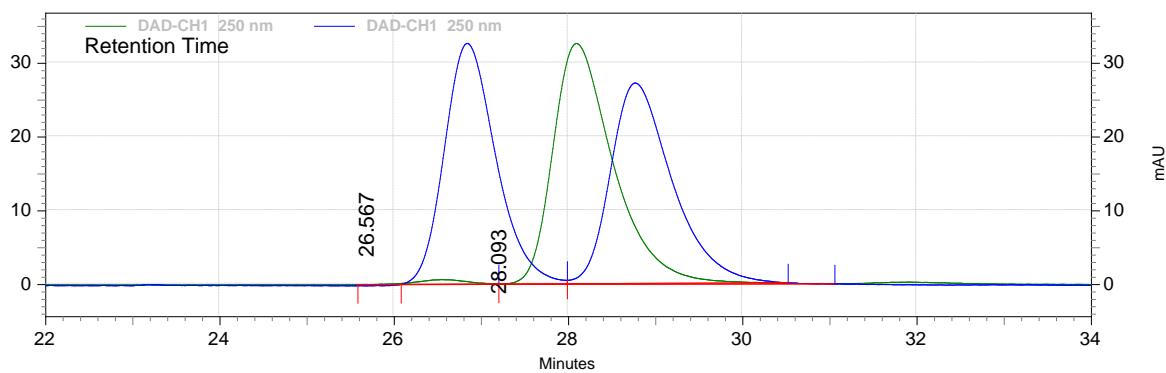

**DAD-CH1 250 nm Results**

| Retention Time | Area           | Area %        | Height        | Height %      |
|----------------|----------------|---------------|---------------|---------------|
| 26.567         | 107170         | 1.67          | 2603          | 1.96          |
| 28.093         | 6323075        | 98.33         | 130525        | 98.04         |
| <b>Totals</b>  | <b>6430245</b> | <b>100.00</b> | <b>133128</b> | <b>100.00</b> |

## X-Ray Crystallographic Data

Table S4. Crystal data and structure refinement for KH-3-008.

|                                  |                                                                                                   |
|----------------------------------|---------------------------------------------------------------------------------------------------|
| Report date                      | 2015-10-05                                                                                        |
| Identification code              | yu48                                                                                              |
| Empirical formula                | C22.80 H16 Br Cl2.39 D0.80 F3 N2 O3                                                               |
| Molecular formula                | C22 H16 Br F3 N2 O3, 0.8(C D Cl3)                                                                 |
| Formula weight                   | 589.28                                                                                            |
| Temperature                      | 100.0 K                                                                                           |
| Wavelength                       | 0.71073 Å                                                                                         |
| Crystal system                   | Orthorhombic                                                                                      |
| Space group                      | P2 <sub>1</sub> 2 <sub>1</sub> 2 <sub>1</sub>                                                     |
| Unit cell dimensions             | a = 9.5997(4) Å      α = 90 °<br>b = 15.9813(6) Å      β = 90 °<br>c = 16.1869(6) Å      γ = 90 ° |
| Volume                           | 2483.32(17) Å <sup>3</sup>                                                                        |
| Z                                | 4                                                                                                 |
| Density (calculated)             | 1.576 Mg/m <sup>3</sup>                                                                           |
| Absorption coefficient           | 1.963 mm <sup>-1</sup>                                                                            |
| F(000)                           | 1177                                                                                              |
| Crystal size                     | 0.22 x 0.13 x 0.08 mm <sup>3</sup>                                                                |
| Crystal color, habit             | colourless block                                                                                  |
| Theta range for data collection  | 2.467 to 27.162 °                                                                                 |
| Index ranges                     | -12 ≤ h ≤ 10, -19 ≤ k ≤ 20, -20 ≤ l ≤ 20                                                          |
| Reflections collected            | 24771                                                                                             |
| Independent reflections          | 5494 [R(int) = 0.0397]                                                                            |
| Completeness to theta = 26.000 ° | 99.9 %                                                                                            |
| Absorption correction            | Semi-empirical from equivalents                                                                   |
| Max. and min. transmission       | 0.4912 and 0.3754                                                                                 |
| Refinement method                | Full-matrix least-squares on F <sup>2</sup>                                                       |
| Data / restraints / parameters   | 5494 / 124 / 362                                                                                  |

|                                      |                                    |
|--------------------------------------|------------------------------------|
| Goodness-of-fit on $F^2$             | 1.041                              |
| Final R indices [ $I > 2\sigma(I)$ ] | R1 = 0.0340, wR2 = 0.0859          |
| R indices (all data)                 | R1 = 0.0430, wR2 = 0.0899          |
| Absolute structure parameter         | 0.012(4)                           |
| Extinction coefficient               | n/a                                |
| Largest diff. peak and hole          | 0.354 and -0.302 e.Å <sup>-3</sup> |

Table S5. Atomic coordinates ( $\times 10^4$ ) and equivalent isotropic displacement parameters ( $\text{\AA}^2 \times 10^3$ )

for KH-3-008.  $U(\text{eq})$  is defined as one third of the trace of the orthogonalized  $U_{ij}$  tensor.

|       | x        | y        | z        | $U(\text{eq})$ |
|-------|----------|----------|----------|----------------|
| Br(1) | 2426(1)  | 4649(1)  | 6008(1)  | 39(1)          |
| F(1A) | 4460(5)  | 10900(3) | 5282(4)  | 87(2)          |
| F(1B) | 2445(16) | 10451(9) | 5944(16) | 87(2)          |
| F(2A) | 2581(4)  | 10190(2) | 5281(2)  | 54(1)          |
| F(2B) | 4198(16) | 11140(7) | 5918(10) | 54(1)          |
| F(3A) | 3225(6)  | 10812(3) | 6348(2)  | 70(1)          |
| F(3B) | 3530(20) | 10487(9) | 4861(8)  | 70(1)          |
| O(1)  | 7286(2)  | 7630(2)  | 4762(1)  | 27(1)          |
| O(2)  | 6197(4)  | 4891(3)  | 1594(2)  | 83(1)          |
| O(3)  | 4874(4)  | 4086(2)  | 2335(2)  | 66(1)          |
| N(1)  | 5002(3)  | 7289(2)  | 4596(2)  | 22(1)          |
| N(2)  | 5488(4)  | 4752(3)  | 2209(3)  | 55(1)          |
| C(1)  | 6068(4)  | 6022(2)  | 6085(2)  | 28(1)          |
| C(2)  | 5100(4)  | 5403(2)  | 5931(2)  | 30(1)          |
| C(3)  | 3802(4)  | 5459(2)  | 6284(2)  | 28(1)          |
| C(4)  | 3465(4)  | 6108(2)  | 6818(2)  | 30(1)          |
| C(5)  | 4443(4)  | 6720(2)  | 6968(2)  | 28(1)          |
| C(6)  | 5761(4)  | 6695(2)  | 6596(2)  | 23(1)          |
| C(7)  | 6777(4)  | 7415(2)  | 6700(2)  | 25(1)          |
| C(8)  | 7405(4)  | 7454(2)  | 7567(2)  | 32(1)          |
| C(9)  | 6039(3)  | 8220(2)  | 6435(2)  | 23(1)          |
| C(10) | 5686(4)  | 8847(2)  | 7002(2)  | 28(1)          |
| C(11) | 4935(4)  | 9540(2)  | 6769(2)  | 28(1)          |
| C(12) | 4511(3)  | 9633(2)  | 5954(2)  | 27(1)          |
| C(13) | 4852(4)  | 9027(2)  | 5373(2)  | 24(1)          |
| C(14) | 5619(4)  | 8328(2)  | 5608(2)  | 20(1)          |
| C(15) | 3704(4)  | 10384(3) | 5699(2)  | 34(1)          |
| C(16) | 6060(4)  | 7719(2)  | 4957(2)  | 21(1)          |
| C(17) | 5164(3)  | 6652(2)  | 3991(2)  | 21(1)          |
| C(18) | 4228(4)  | 5997(2)  | 3998(2)  | 25(1)          |
| C(19) | 4332(4)  | 5366(2)  | 3420(2)  | 32(1)          |
| C(20) | 5362(4)  | 5412(3)  | 2833(2)  | 36(1)          |
| C(21) | 6302(4)  | 6074(3)  | 2796(2)  | 36(1)          |
| C(22) | 6212(4)  | 6698(2)  | 3386(2)  | 30(1)          |

|        |          |         |         |       |
|--------|----------|---------|---------|-------|
| Cl(1A) | 2301(9)  | 2557(3) | 5294(3) | 83(2) |
| Cl(1B) | 1584(7)  | 2553(4) | 5370(4) | 45(1) |
| Cl(2A) | 966(10)  | 1856(6) | 3900(6) | 71(3) |
| Cl(2B) | 1057(11) | 1697(8) | 3834(7) | 39(2) |
| Cl(3A) | 3255(8)  | 2966(4) | 3647(4) | 69(2) |
| Cl(3B) | 3044(12) | 3041(8) | 3899(5) | 73(3) |
| C(1A)  | 2494(11) | 2218(5) | 4297(5) | 47(2) |
| D(1A)  | 3147     | 1731    | 4315    | 56    |
| C(1B)  | 1539(16) | 2605(8) | 4311(8) | 47(2) |
| D(1B)  | 781      | 3014    | 4180    | 56    |

---



Table S6. Bond lengths [ $\text{\AA}$ ] and angles [ $^\circ$ ] for KH-3-008.

---

|             |           |
|-------------|-----------|
| Br(1)-C(3)  | 1.903(4)  |
| F(1A)-C(15) | 1.290(5)  |
| F(1B)-C(15) | 1.276(15) |
| F(2A)-C(15) | 1.309(5)  |
| F(2B)-C(15) | 1.346(13) |
| F(3A)-C(15) | 1.335(5)  |
| F(3B)-C(15) | 1.377(14) |
| O(1)-C(16)  | 1.227(4)  |
| O(2)-N(2)   | 1.226(6)  |
| O(3)-N(2)   | 1.233(6)  |
| N(1)-H(1)   | 0.94(3)   |
| N(1)-C(16)  | 1.358(4)  |
| N(1)-C(17)  | 1.421(4)  |
| N(2)-C(20)  | 1.465(5)  |
| C(1)-H(1A)  | 0.9500    |
| C(1)-C(2)   | 1.381(5)  |
| C(1)-C(6)   | 1.389(5)  |
| C(2)-H(2)   | 0.9500    |
| C(2)-C(3)   | 1.373(5)  |
| C(3)-C(4)   | 1.388(5)  |
| C(4)-H(4)   | 0.9500    |
| C(4)-C(5)   | 1.378(5)  |
| C(5)-H(5)   | 0.9500    |
| C(5)-C(6)   | 1.401(5)  |
| C(6)-C(7)   | 1.518(5)  |
| C(7)-H(7)   | 1.0000    |
| C(7)-C(8)   | 1.529(5)  |
| C(7)-C(9)   | 1.530(5)  |
| C(8)-H(8A)  | 0.9800    |
| C(8)-H(8B)  | 0.9800    |
| C(8)-H(8C)  | 0.9800    |
| C(9)-C(10)  | 1.400(5)  |
| C(9)-C(14)  | 1.410(5)  |
| C(10)-H(10) | 0.9500    |

|              |           |
|--------------|-----------|
| C(10)-C(11)  | 1.375(5)  |
| C(11)-H(11)  | 0.9500    |
| C(11)-C(12)  | 1.388(5)  |
| C(12)-C(13)  | 1.390(5)  |
| C(12)-C(15)  | 1.487(5)  |
| C(13)-H(13)  | 0.9500    |
| C(13)-C(14)  | 1.390(5)  |
| C(14)-C(16)  | 1.496(5)  |
| C(17)-C(18)  | 1.380(5)  |
| C(17)-C(22)  | 1.406(5)  |
| C(18)-H(18)  | 0.9500    |
| C(18)-C(19)  | 1.379(5)  |
| C(19)-H(19)  | 0.9500    |
| C(19)-C(20)  | 1.374(6)  |
| C(20)-C(21)  | 1.392(6)  |
| C(21)-H(21)  | 0.9500    |
| C(21)-C(22)  | 1.384(5)  |
| C(22)-H(22)  | 0.9500    |
| Cl(1A)-C(1A) | 1.713(10) |
| Cl(1B)-C(1B) | 1.717(13) |
| Cl(2A)-C(1A) | 1.703(13) |
| Cl(2B)-C(1B) | 1.708(15) |
| Cl(3A)-C(1A) | 1.752(11) |
| Cl(3B)-C(1B) | 1.737(16) |
| C(1A)-D(1A)  | 1.0000    |
| C(1B)-D(1B)  | 1.0000    |

|                  |          |
|------------------|----------|
| C(16)-N(1)-H(1)  | 116(4)   |
| C(16)-N(1)-C(17) | 125.2(3) |
| C(17)-N(1)-H(1)  | 115(4)   |
| O(2)-N(2)-O(3)   | 123.8(4) |
| O(2)-N(2)-C(20)  | 118.3(5) |
| O(3)-N(2)-C(20)  | 117.9(4) |
| C(2)-C(1)-H(1A)  | 119.4    |
| C(2)-C(1)-C(6)   | 121.3(3) |
| C(6)-C(1)-H(1A)  | 119.4    |

|                   |          |
|-------------------|----------|
| C(1)-C(2)-H(2)    | 120.4    |
| C(3)-C(2)-C(1)    | 119.3(3) |
| C(3)-C(2)-H(2)    | 120.4    |
| C(2)-C(3)-Br(1)   | 119.2(3) |
| C(2)-C(3)-C(4)    | 121.3(3) |
| C(4)-C(3)-Br(1)   | 119.5(3) |
| C(3)-C(4)-H(4)    | 120.6    |
| C(5)-C(4)-C(3)    | 118.8(4) |
| C(5)-C(4)-H(4)    | 120.6    |
| C(4)-C(5)-H(5)    | 119.4    |
| C(4)-C(5)-C(6)    | 121.3(3) |
| C(6)-C(5)-H(5)    | 119.4    |
| C(1)-C(6)-C(5)    | 118.0(3) |
| C(1)-C(6)-C(7)    | 121.1(3) |
| C(5)-C(6)-C(7)    | 120.7(3) |
| C(6)-C(7)-H(7)    | 107.3    |
| C(6)-C(7)-C(8)    | 112.7(3) |
| C(6)-C(7)-C(9)    | 108.0(3) |
| C(8)-C(7)-H(7)    | 107.3    |
| C(8)-C(7)-C(9)    | 114.0(3) |
| C(9)-C(7)-H(7)    | 107.3    |
| C(7)-C(8)-H(8A)   | 109.5    |
| C(7)-C(8)-H(8B)   | 109.5    |
| C(7)-C(8)-H(8C)   | 109.5    |
| H(8A)-C(8)-H(8B)  | 109.5    |
| H(8A)-C(8)-H(8C)  | 109.5    |
| H(8B)-C(8)-H(8C)  | 109.5    |
| C(10)-C(9)-C(7)   | 122.0(3) |
| C(10)-C(9)-C(14)  | 117.7(3) |
| C(14)-C(9)-C(7)   | 120.2(3) |
| C(9)-C(10)-H(10)  | 119.2    |
| C(11)-C(10)-C(9)  | 121.6(3) |
| C(11)-C(10)-H(10) | 119.2    |
| C(10)-C(11)-H(11) | 120.0    |
| C(10)-C(11)-C(12) | 120.0(3) |
| C(12)-C(11)-H(11) | 120.0    |

|                   |           |
|-------------------|-----------|
| C(11)-C(12)-C(13) | 120.0(3)  |
| C(11)-C(12)-C(15) | 120.2(3)  |
| C(13)-C(12)-C(15) | 119.8(3)  |
| C(12)-C(13)-H(13) | 120.0     |
| C(12)-C(13)-C(14) | 119.9(3)  |
| C(14)-C(13)-H(13) | 120.0     |
| C(9)-C(14)-C(16)  | 120.5(3)  |
| C(13)-C(14)-C(9)  | 120.7(3)  |
| C(13)-C(14)-C(16) | 118.7(3)  |
| F(1A)-C(15)-F(2A) | 110.1(4)  |
| F(1A)-C(15)-F(3A) | 106.1(4)  |
| F(1A)-C(15)-C(12) | 111.6(4)  |
| F(1B)-C(15)-F(2B) | 100.2(11) |
| F(1B)-C(15)-F(3B) | 100.4(13) |
| F(1B)-C(15)-C(12) | 118.4(6)  |
| F(2A)-C(15)-F(3A) | 104.1(4)  |
| F(2A)-C(15)-C(12) | 112.5(3)  |
| F(2B)-C(15)-F(3B) | 101.3(10) |
| F(2B)-C(15)-C(12) | 117.9(6)  |
| F(3A)-C(15)-C(12) | 112.0(3)  |
| F(3B)-C(15)-C(12) | 115.7(6)  |
| O(1)-C(16)-N(1)   | 123.3(3)  |
| O(1)-C(16)-C(14)  | 121.8(3)  |
| N(1)-C(16)-C(14)  | 114.9(3)  |
| C(18)-C(17)-N(1)  | 117.8(3)  |
| C(18)-C(17)-C(22) | 120.8(3)  |
| C(22)-C(17)-N(1)  | 121.4(3)  |
| C(17)-C(18)-H(18) | 119.9     |
| C(17)-C(18)-C(19) | 120.1(3)  |
| C(19)-C(18)-H(18) | 119.9     |
| C(18)-C(19)-H(19) | 120.6     |
| C(20)-C(19)-C(18) | 118.9(4)  |
| C(20)-C(19)-H(19) | 120.6     |
| C(19)-C(20)-N(2)  | 119.9(4)  |
| C(19)-C(20)-C(21) | 122.4(4)  |
| C(21)-C(20)-N(2)  | 117.7(4)  |

|                     |          |
|---------------------|----------|
| C(20)-C(21)-H(21)   | 120.7    |
| C(22)-C(21)-C(20)   | 118.6(4) |
| C(22)-C(21)-H(21)   | 120.7    |
| C(17)-C(22)-H(22)   | 120.4    |
| C(21)-C(22)-C(17)   | 119.2(4) |
| C(21)-C(22)-H(22)   | 120.4    |
| Cl(1A)-C(1A)-Cl(3A) | 113.3(6) |
| Cl(1A)-C(1A)-D(1A)  | 106.7    |
| Cl(2A)-C(1A)-Cl(1A) | 111.7(7) |
| Cl(2A)-C(1A)-Cl(3A) | 111.4(6) |
| Cl(2A)-C(1A)-D(1A)  | 106.7    |
| Cl(3A)-C(1A)-D(1A)  | 106.7    |
| Cl(1B)-C(1B)-Cl(3B) | 112.4(8) |
| Cl(1B)-C(1B)-D(1B)  | 105.2    |
| Cl(2B)-C(1B)-Cl(1B) | 114.6(9) |
| Cl(2B)-C(1B)-Cl(3B) | 113.1(9) |
| Cl(2B)-C(1B)-D(1B)  | 105.2    |
| Cl(3B)-C(1B)-D(1B)  | 105.2    |

Table S7. Anisotropic displacement parameters ( $\text{\AA}^2 \times 10^3$ ) for KH-3-008. The anisotropic

displacement factor exponent takes the form:  $-2\pi^2 [ h^2 a^{*2} U^{11} + \dots + 2 h k a^* b^* U^{12} ]$

|       | U <sup>11</sup> | U <sup>22</sup> | U <sup>33</sup> | U <sup>23</sup> | U <sup>13</sup> | U <sup>12</sup> |
|-------|-----------------|-----------------|-----------------|-----------------|-----------------|-----------------|
| Br(1) | 40(1)           | 30(1)           | 49(1)           | 4(1)            | -10(1)          | -10(1)          |
| F(1A) | 55(2)           | 44(2)           | 161(5)          | 55(3)           | 29(3)           | 17(2)           |
| F(1B) | 55(2)           | 44(2)           | 161(5)          | 55(3)           | 29(3)           | 17(2)           |
| F(2A) | 55(2)           | 36(2)           | 72(2)           | -13(2)          | -34(2)          | 17(2)           |
| F(2B) | 55(2)           | 36(2)           | 72(2)           | -13(2)          | -34(2)          | 17(2)           |
| F(3A) | 103(3)          | 53(2)           | 52(2)           | -21(2)          | -17(2)          | 50(2)           |
| F(3B) | 103(3)          | 53(2)           | 52(2)           | -21(2)          | -17(2)          | 50(2)           |
| O(1)  | 15(1)           | 38(1)           | 29(1)           | -7(1)           | 0(1)            | 0(1)            |
| O(2)  | 35(2)           | 125(3)          | 90(3)           | -81(3)          | 10(2)           | -1(2)           |
| O(3)  | 48(2)           | 48(2)           | 103(3)          | -50(2)          | -32(2)          | 16(2)           |
| N(1)  | 15(1)           | 25(2)           | 25(1)           | -5(1)           | -1(1)           | 0(1)            |
| N(2)  | 24(2)           | 66(3)           | 75(3)           | -46(2)          | -15(2)          | 17(2)           |
| C(1)  | 26(2)           | 26(2)           | 31(2)           | 1(2)            | 3(2)            | 6(2)            |
| C(2)  | 34(2)           | 22(2)           | 34(2)           | 3(2)            | -3(2)           | 4(2)            |
| C(3)  | 28(2)           | 20(2)           | 34(2)           | 5(2)            | -6(2)           | -3(2)           |
| C(4)  | 25(2)           | 31(2)           | 35(2)           | 7(2)            | 2(2)            | 0(2)            |
| C(5)  | 29(2)           | 23(2)           | 31(2)           | 0(2)            | 1(2)            | 3(2)            |
| C(6)  | 25(2)           | 23(2)           | 23(2)           | 6(1)            | -1(1)           | 3(2)            |
| C(7)  | 23(2)           | 28(2)           | 24(2)           | 3(2)            | 1(1)            | 1(2)            |
| C(8)  | 29(2)           | 35(2)           | 31(2)           | -1(2)           | -7(2)           | -2(2)           |
| C(9)  | 18(2)           | 24(2)           | 27(2)           | -2(1)           | -1(1)           | -3(1)           |
| C(10) | 26(2)           | 31(2)           | 26(2)           | -3(2)           | -1(2)           | -3(2)           |
| C(11) | 29(2)           | 26(2)           | 30(2)           | -9(2)           | 2(1)            | -6(2)           |
| C(12) | 20(2)           | 22(2)           | 39(2)           | -3(2)           | -4(2)           | -2(2)           |
| C(13) | 21(2)           | 25(2)           | 25(2)           | -3(1)           | -2(1)           | -3(1)           |
| C(14) | 14(2)           | 22(2)           | 25(2)           | -2(1)           | 1(1)            | -4(1)           |
| C(15) | 37(2)           | 27(2)           | 39(2)           | -7(2)           | -3(2)           | 5(2)            |
| C(16) | 21(2)           | 20(2)           | 22(2)           | 2(1)            | -1(1)           | -1(1)           |
| C(17) | 17(2)           | 22(2)           | 23(2)           | -1(1)           | -3(1)           | 6(1)            |

|        |        |       |       |        |        |        |
|--------|--------|-------|-------|--------|--------|--------|
| C(18)  | 19(2)  | 25(2) | 31(2) | -1(2)  | -4(2)  | 5(1)   |
| C(19)  | 23(2)  | 24(2) | 50(2) | -10(2) | -10(2) | 4(2)   |
| C(20)  | 24(2)  | 39(2) | 44(2) | -21(2) | -12(2) | 13(2)  |
| C(21)  | 25(2)  | 50(2) | 33(2) | -13(2) | 1(2)   | 8(2)   |
| C(22)  | 25(2)  | 33(2) | 31(2) | -6(2)  | 2(2)   | 0(2)   |
| CI(1A) | 134(4) | 62(2) | 54(2) | -24(2) | -40(3) | 29(3)  |
| CI(1B) | 64(3)  | 37(2) | 36(2) | 0(2)   | -1(2)  | -2(2)  |
| CI(2A) | 103(4) | 53(4) | 58(3) | 2(3)   | -31(3) | -11(3) |
| CI(2B) | 45(3)  | 40(4) | 32(2) | -7(2)  | -6(2)  | -14(2) |
| CI(3A) | 87(4)  | 48(2) | 73(4) | 7(2)   | -36(3) | -14(2) |
| CI(3B) | 84(4)  | 83(5) | 50(4) | 5(3)   | 5(3)   | -44(3) |
| C(1A)  | 58(5)  | 34(4) | 48(3) | 0(3)   | -20(4) | 7(4)   |
| C(1B)  | 58(5)  | 34(4) | 48(3) | 0(3)   | -20(4) | 7(4)   |

---

Table S8. Hydrogen coordinates ( $\times 10^4$ ) and isotropic displacement parameters ( $\text{\AA}^2 \times 10^3$ ) for KH-3-008.

|       | x        | y        | z        | U(eq) |
|-------|----------|----------|----------|-------|
| H(1)  | 4160(40) | 7260(40) | 4890(40) | 104   |
| H(1A) | 6963     | 5987     | 5836     | 33    |
| H(2)  | 5328     | 4942     | 5586     | 36    |
| H(4)  | 2576     | 6129     | 7075     | 37    |
| H(5)  | 4220     | 7168     | 7331     | 33    |
| H(7)  | 7562     | 7320     | 6305     | 30    |
| H(8A) | 8056     | 7925     | 7601     | 48    |
| H(8B) | 7902     | 6931     | 7683     | 48    |
| H(8C) | 6659     | 7530     | 7974     | 48    |
| H(10) | 5972     | 8791     | 7561     | 33    |
| H(11) | 4705     | 9956     | 7166     | 34    |
| H(13) | 4561     | 9090     | 4815     | 29    |
| H(18) | 3510     | 5980     | 4402     | 30    |
| H(19) | 3701     | 4908     | 3427     | 39    |
| H(21) | 6990     | 6097     | 2374     | 43    |
| H(22) | 6852     | 7151     | 3383     | 36    |

Table S9. Hydrogen bonds for KH-3-008 [ $\text{\AA}$  and  $^\circ$ ].

| D-H...A            | d(D-H)  | d(H...A) | d(D...A) | $\angle$ (DHA) |
|--------------------|---------|----------|----------|----------------|
| N(1)-H(1)...O(1)#1 | 0.94(3) | 1.89(3)  | 2.810(4) | 164(6)         |

Symmetry transformations used to generate equivalent atoms:

#1  $x-1/2, -y+3/2, -z+1$



## References

- 1 J. M. Brown, Selectivity and mechanism in catalytic asymmetric synthesis. *Chem. Soc. Rev.* **22**, 25–41 (1993).
- 2 A. H. Hoveyda, D. A. Evans, G. C. Fu, Substrate-directable chemical reactions. *Chem. Rev.* **93**, 1307–1370 (1993).
- 3 C. G. Hartung, V. Snieckus, in *Modern Arene Chemistry*, D. Astruc, Ed. (Wiley-VCH, Weinheim, Germany, 2004), pp. 330–367.
- 4 R. A. Johnson, K. B. Sharpless, in *Catalytic Asymmetric Synthesis*, I. Ojima, Ed. (Wiley-VCH, Weinheim, Germany, ed. 2, 2005), pp. 231–280.
- 5 Z. Li, H. Yamamoto, Hydroxamic acids in asymmetric synthesis. *Acc. Chem. Res.* **46**, 506–518 (2013).
- 6 X. Chen, K. M. Engle, D.-H. Wang, J.-Q. Yu, Palladium(II)-catalyzed C–H activation/C–C cross-coupling reactions: versatility and practicality. *Angew. Chem. Int. Ed.* **48**, 5094–5115 (2009).
- 7 O. Daugulis, H.-Q. Do, D. Shabashov, Palladium- and copper-catalyzed arylation of carbon–hydrogen bonds. *Acc. Chem. Res.* **42**, 1074–1086 (2009).
- 8 L. Ackermann, R. Vicente, A. Kapdi, Transition-metal-catalyzed direct arylations of (hetero)arenes via C–H bond cleavage. *Angew. Chem. Int. Ed.* **48**, 9792–9826 (2009).
- 9 L. V. Desai, K. L. Hull, M. S. Sanford, Palladium-catalyzed oxygenation of unactivated sp<sup>3</sup> C–H bonds. *J. Am. Chem. Soc.* **126**, 9542–9543 (2004).
- 10 D. A. Colby, R. G. Bergman, J. A. Ellman, Rhodium-catalyzed C–C bond formation via heteroatom-directed C–H bond activation. *Chem. Rev.* **110**, 624–655 (2010).
- 11 J. Wencel-Delord, T. Dröge, F. Liu, F. Glorius, Towards mild metal-catalyzed C–H bond activation. *Chem. Soc. Rev.* **40**, 4740–4761 (2011).
- 12 C.-H. Jun, H. Lee, J.-B. Hong, Chelation-assisted intermolecular hydroacylation: direct synthesis of ketone from aldehyde and 1-alkene. *J. Org. Chem.* **62**, 1200–1201 (1997).
- 13 F. Mo, G. Dong, Regioselective ketone  $\alpha$ -alkylation with simple olefins via dual activation. *Science*, **345**, 68–72 (2014).
- 14 R. B. Bedford, S. J. Coles, M. B. Hursthouse, M. E. Limmert, The catalytic intermolecular orthoarylation of phenols. *Angew. Chem. Int. Ed.* **42**, 112–114 (2003).
- 15 T. E. Lightburn, M. T. Dombrowski, K. L. Tan, Catalytic scaffolding ligands: an efficient strategy for directing reactions. *J. Am. Chem. Soc.* **130**, 9210–9211 (2008).
- 16 C. U. Grünanger, B. Breit, Branched-regioselective hydroformylation with catalytic amounts of a reversibly bound directing group. *Angew. Chem. Int. Ed.* **47**, 7346–7349 (2008).
- 17 D.-H. Wang, M. Wasa, R. Giri, J.-Q. Yu, Pd(II)-catalyzed cross-coupling of sp<sup>3</sup> C–H bonds with sp<sup>2</sup> and sp<sup>3</sup> boronic acids using air as the oxidant. *J. Am. Chem. Soc.* **130**, 7190–7191 (2008).
- 18 J. He, S. Li, Y. Deng, H. Fu, B. N. Laforteza, J. E. Spangler, A. Homs, J.-Q. Yu, Ligand-controlled C(sp<sup>3</sup>)–H arylation and olefination in synthesis of unnatural chiral  $\alpha$ -amino acids. *Science* **343**, 1216–1220 (2014).
- 19 B.-F. Shi, N. Maugel, Y.-H. Zhang, J.-Q. Yu, Pd<sup>II</sup>-catalyzed enantioselective activation of C(sp<sup>2</sup>)–H

- and C(sp<sup>3</sup>)-H bonds using monoprotected amino acids as chiral ligands. *Angew. Chem. Int. Ed.* **47**, 4882–4886 (2008).
- 20 D.-H. Wang, K. M. Engle, B.-F. Shi, J.-Q. Yu, Ligand-enabled reactivity and selectivity in a synthetically versatile aryl C-H olefination. *Science* **327**, 315–319 (2010).
  - 21 W. Gong, G. Zhang, T. Liu, R. Giri, J.-Q. Yu, Site-selective C(sp<sup>3</sup>)-H functionalization of di-, tri-, and tetrapeptides at the N-terminus. *J. Am. Chem. Soc.* **136**, 16940–16946 (2014).
  - 22 F. C. McIntire, Some Schiff bases of free amino acids. *J. Am. Chem. Soc.* **69**, 1377–1380 (1947).
  - 23 R. C. Larock, *Comprehensive Organic Transformations* (Wiley, New York, ed. 2, 1999), pp. 1197–1620.
  - 24 M. T. Pirnot, D. A. Rankic, D. B. C. Martin, D. W. C. MacMillan, Photoredox activation for the direct  $\beta$ -arylation of ketones and aldehydes. *Science* **339**, 1593–1596 (2013).
  - 25 Z. Huang, G. Dong, Catalytic direct  $\beta$ -arylation of simple ketones with aryl Iodides. *J. Am. Chem. Soc.* **135**, 17747–17750 (2013).
  - 26 T. Kang, Y. Kim, D. Lee, Z. Wang, S. Chang, Iridium-catalyzed intermolecular amidation of sp<sup>3</sup> C-H bonds: late-stage functionalization of an unactivated methyl group. *J. Am. Chem. Soc.* **136**, 4141–4144 (2014).
  - 27 P. Gao, W. Guo, J. Xue, Y. Zhao, Y. Yuan, Y. Xia, Z. Shi, Iridium(III)-catalyzed direct arylation of C-H bonds with diaryliodonium salts. *J. Am. Chem. Soc.* **137**, 12231–12240 (2015).
  - 28 M. Nakanishi, D. Katayev, C. Besnard, E. P. Kündig, Fused indolines by palladium-catalyzed asymmetric C-C coupling involving an unactivated methylene group. *Angew. Chem. Int. Ed.* **50**, 7438–7441 (2011).
  - 29 S. Anas, A. Cordi, H. B. Kagan, Enantioselective synthesis of 2-methyl indolines by palladium catalysed asymmetric C(sp<sup>3</sup>)-H/cyclisation. *Chem. Commun.* **47**, 11483–11485 (2011).
  - 30 T. Saget, S. J. Lemouzy, N. Cramer, Chiral monodentate phosphines and bulky carboxylic acids: cooperative effects in palladium-catalyzed enantioselective C(sp<sup>3</sup>)-H functionalization. *Angew. Chem. Int. Ed.* **51**, 2238–2242 (2012).
  - 31 G. Cahiez, F. Lepifre, P. Ramiandrasoa, Manganese-catalyzed substitution of activated aryl halides (X = Cl, Br and F) and aryl ethers by organomagnesium reagents. *Synthesis* 2138–2144 (1999).
